# Supplementary material for: Deciphering the shape selective conformational equilibrium of E- and Z-locked azobenzene–tetraethylammonium ion in regulating photo-switchable K+-ion channel blocking
Source: Royal Society of Chemistry journal article supplement (doi:10.1039/d4cp01604a), 2024-01-01
Supplement: d4cp01604a6.pdf [file d4cp01604a6.pdf]

## *Representative structures from Hierarchical clustering result*

# **Deciphering the Shape Selective Conformational Equilibrium of *E*- and *Z*-Locked Azobenzene-Tetraethyl Ammonium Ion in Regulating Photo-switchable K<sup>+</sup>-ion Channel Blocking**

Rinsha Cholasseri<sup>a</sup> and Susmita De<sup>\*b</sup>

<sup>a</sup>Theoretical and Computational Chemistry Laboratory, Department of Chemistry, National Institute of Technology Calicut, Kozhikode, Kerala, India - 673 601.

<sup>b</sup>Department of Chemistry, University of Calicut, Calicut University P. O., Malappuram, Kerala, India - 673 635. E-mail: [susmita@uoc.ac.in](mailto:susmita@uoc.ac.in)

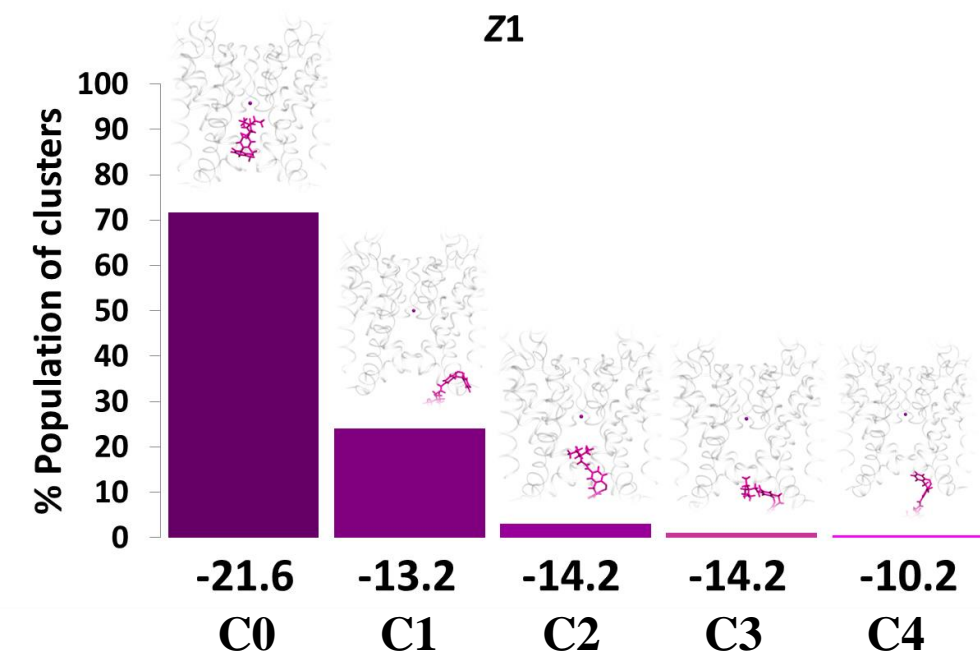

Cn (n = 0 – 1) indicate different clusters. The percentage population of clusters is given on the Y-axis. Corresponding binding energy (B.E.) is given in kcal/mol on the X-axis. Protein is represented in new cartoon model with K<sup>+</sup>-ion (purple ball), and Z-LAB-TEA is shown in stick model (magenta colour).

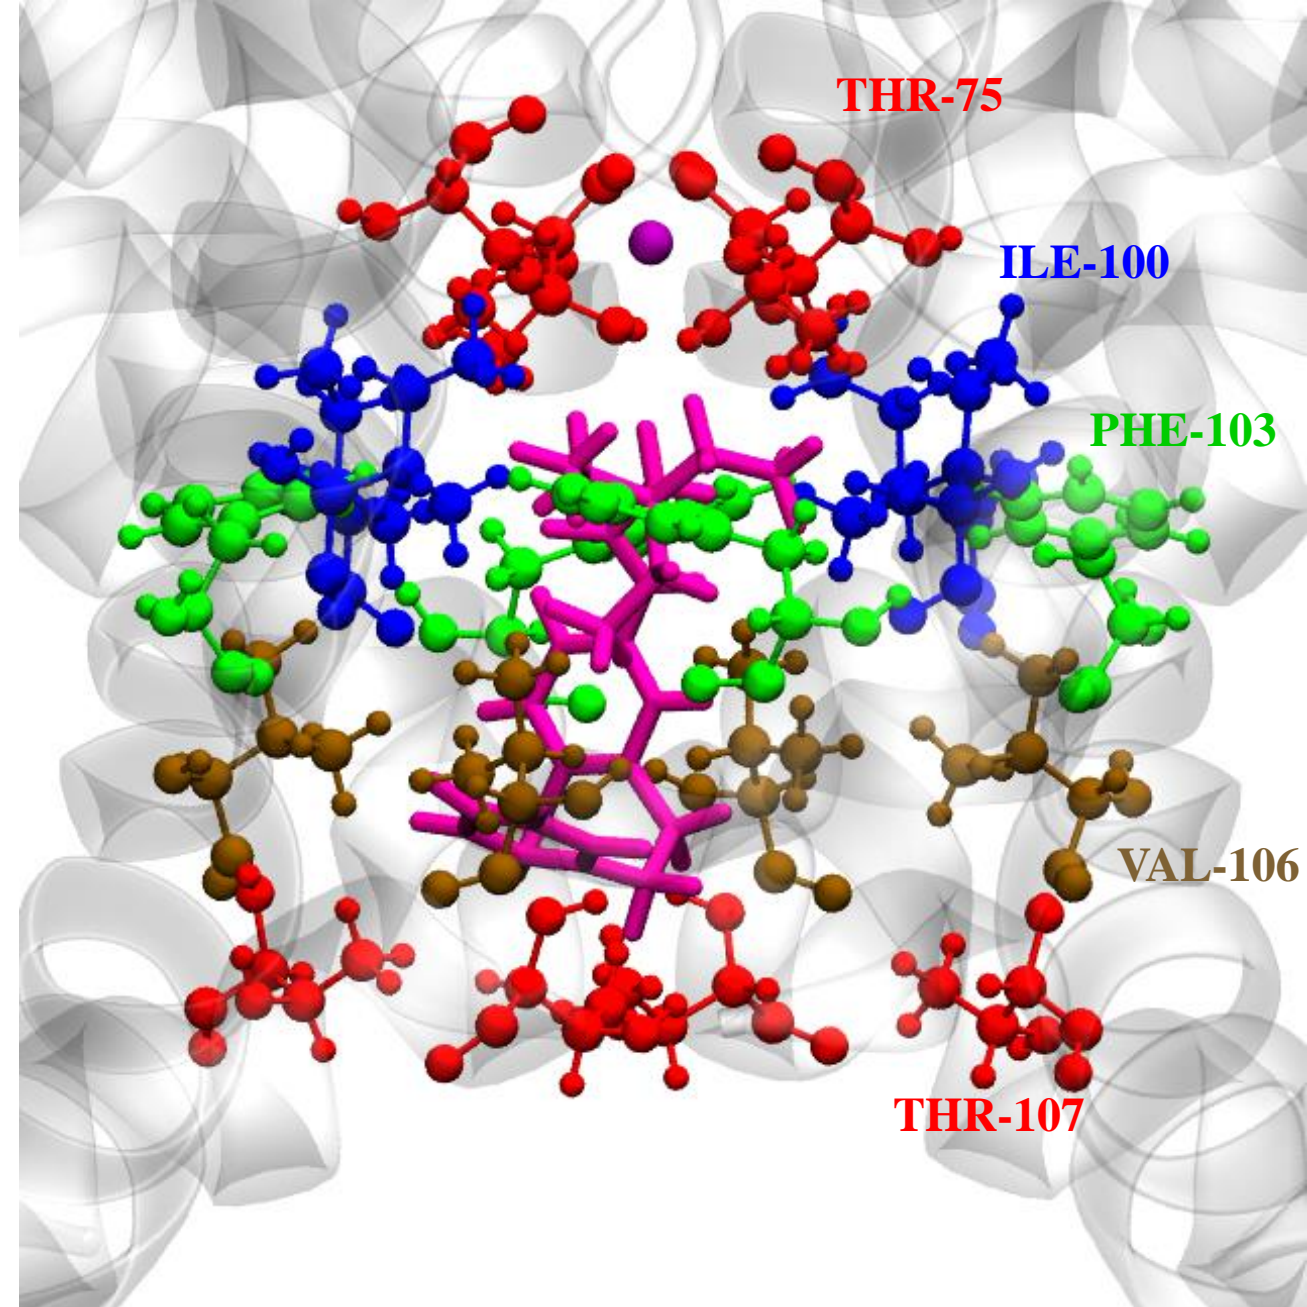

Z1(C0)

MM/PBSA Binding energy = -21.6 kcal/mol<sup>2</sup>

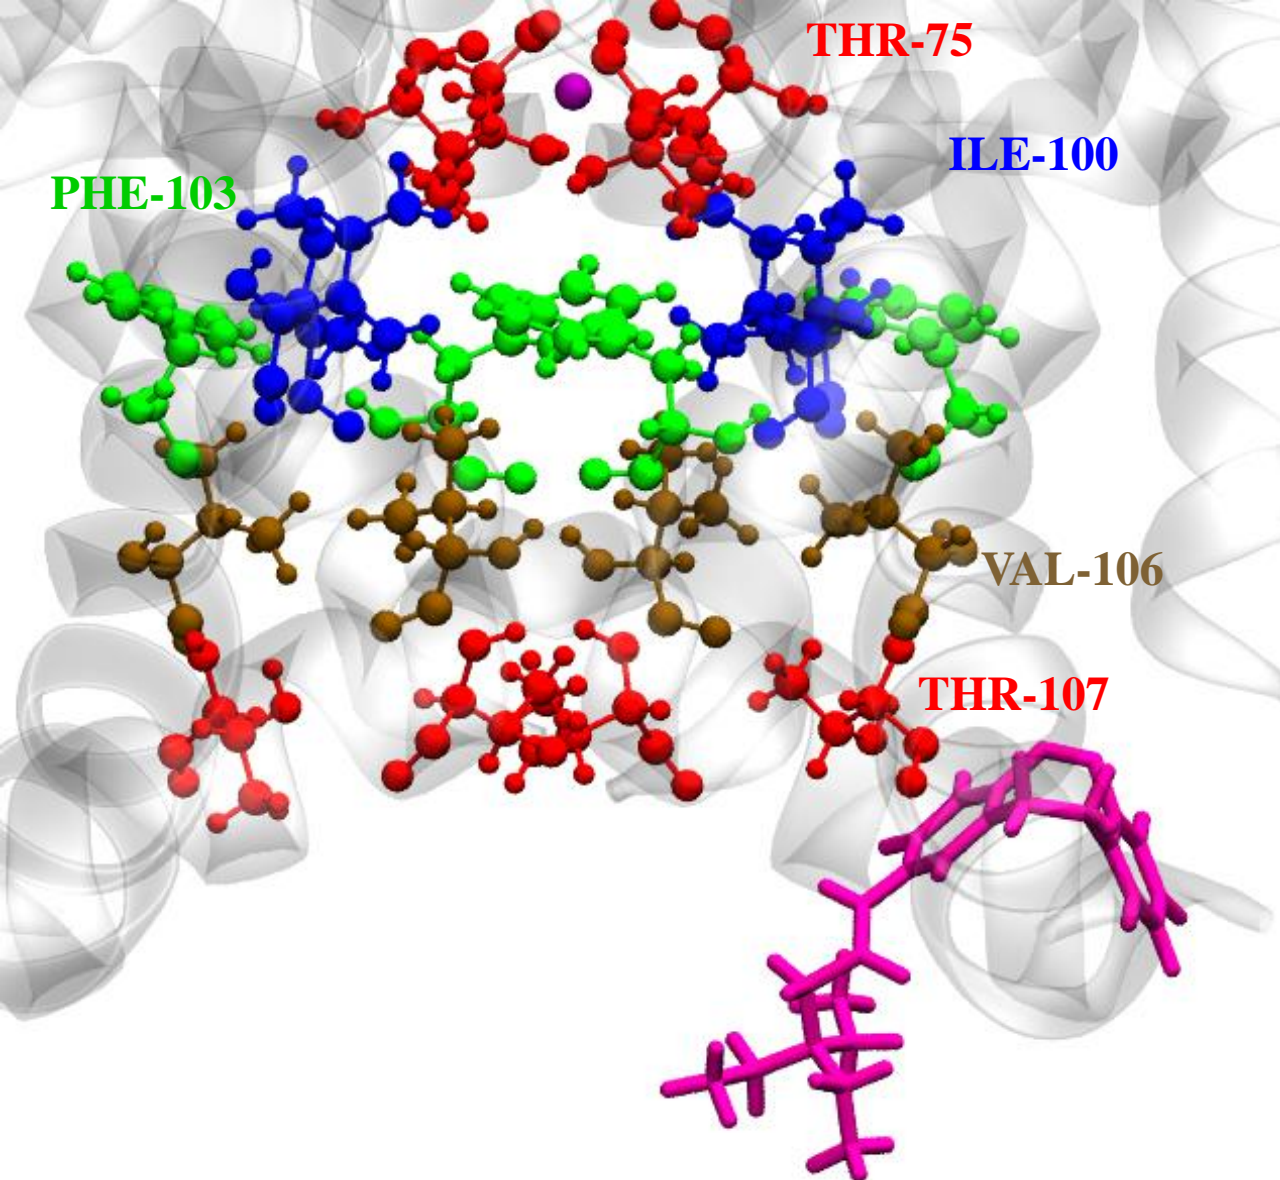

**Z1 (C1)**

**MM/PBSA Binding energy = -13.2 kcal/mol**

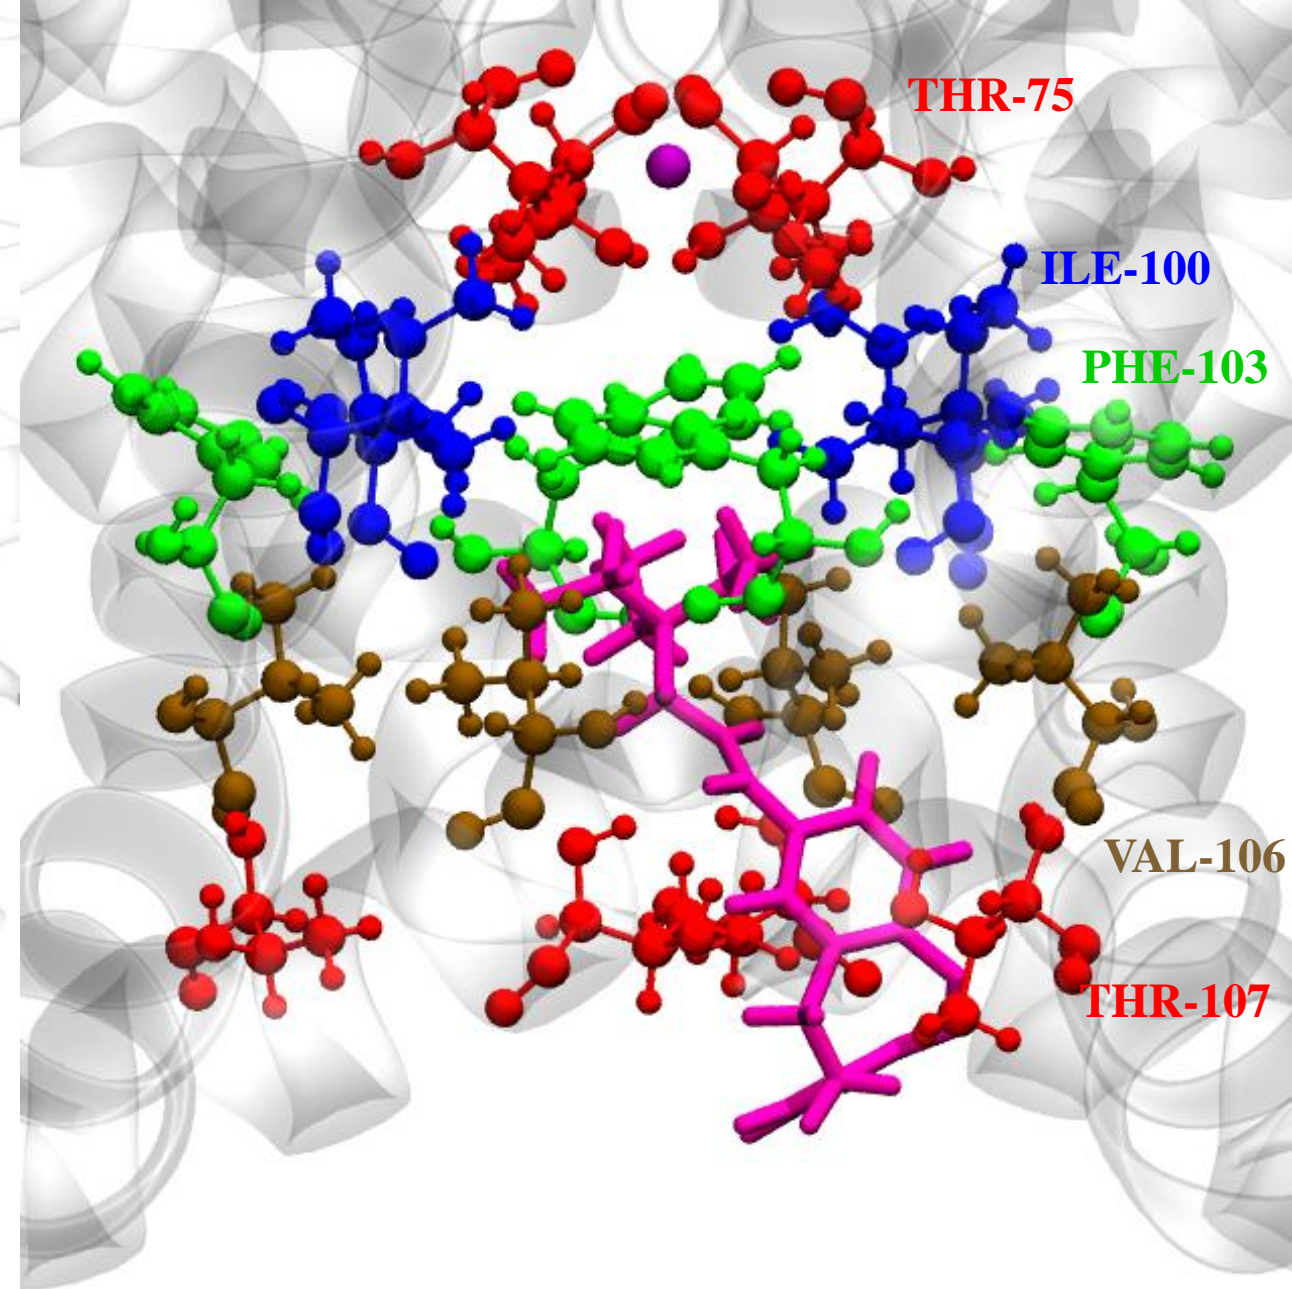

**Z1 (C2)**

**MM/PBSA Binding energy = -14.2 kcal/mol<sup>3</sup>**

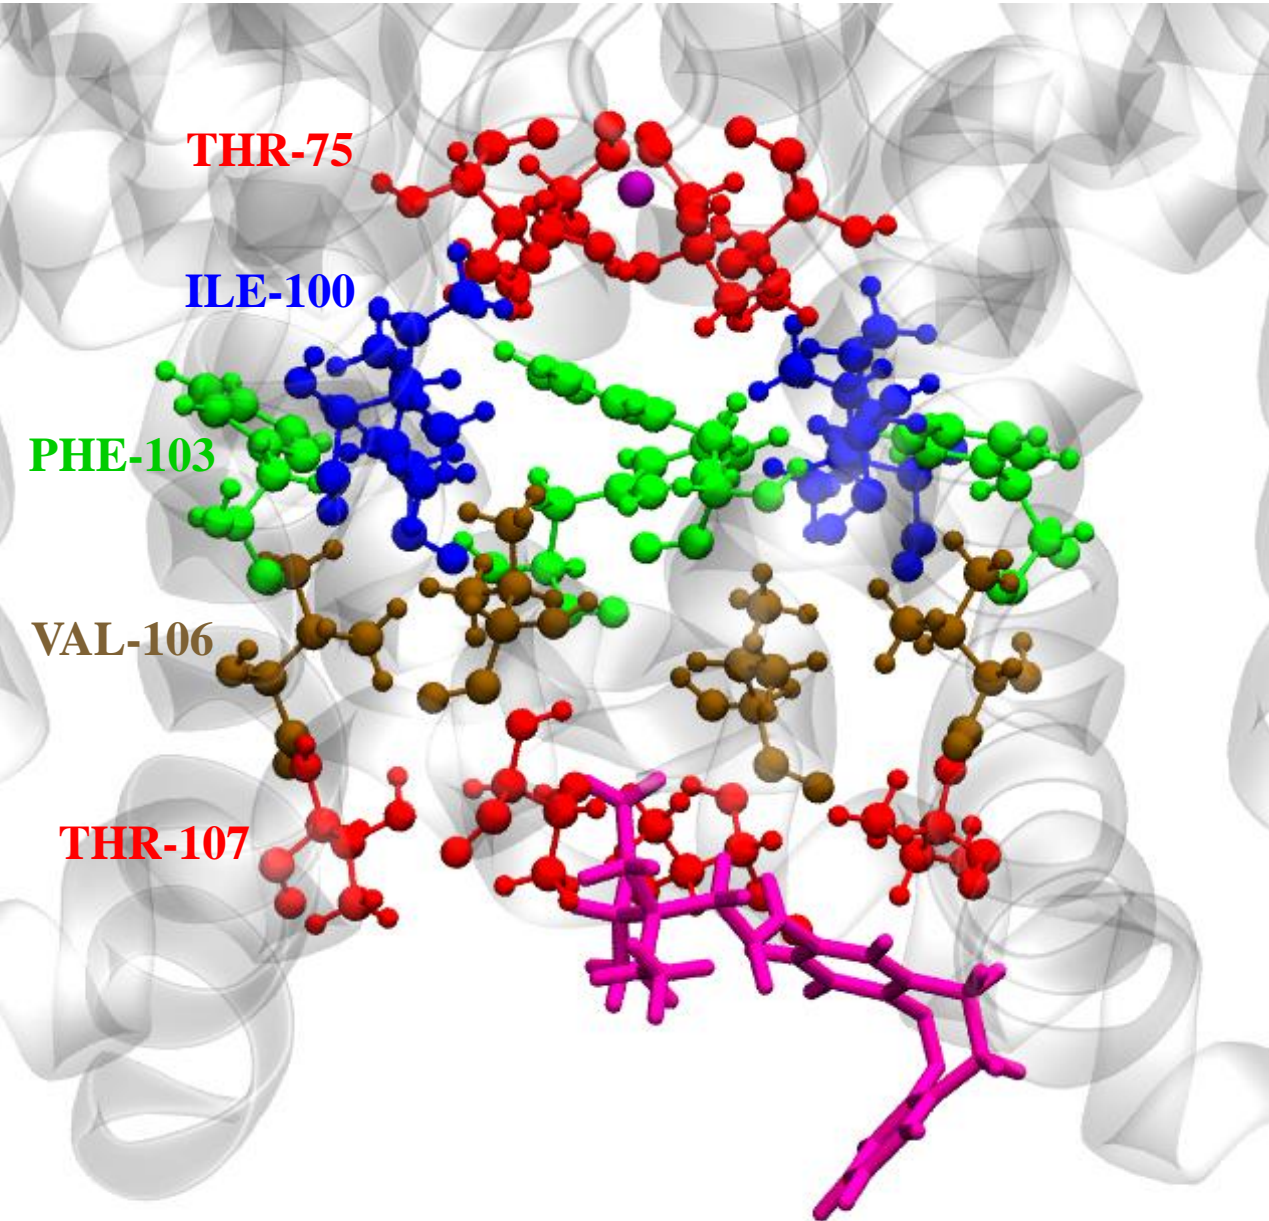

**Z1 (C3)**

**MM/PBSA Binding energy = -14.2 kcal/mol**

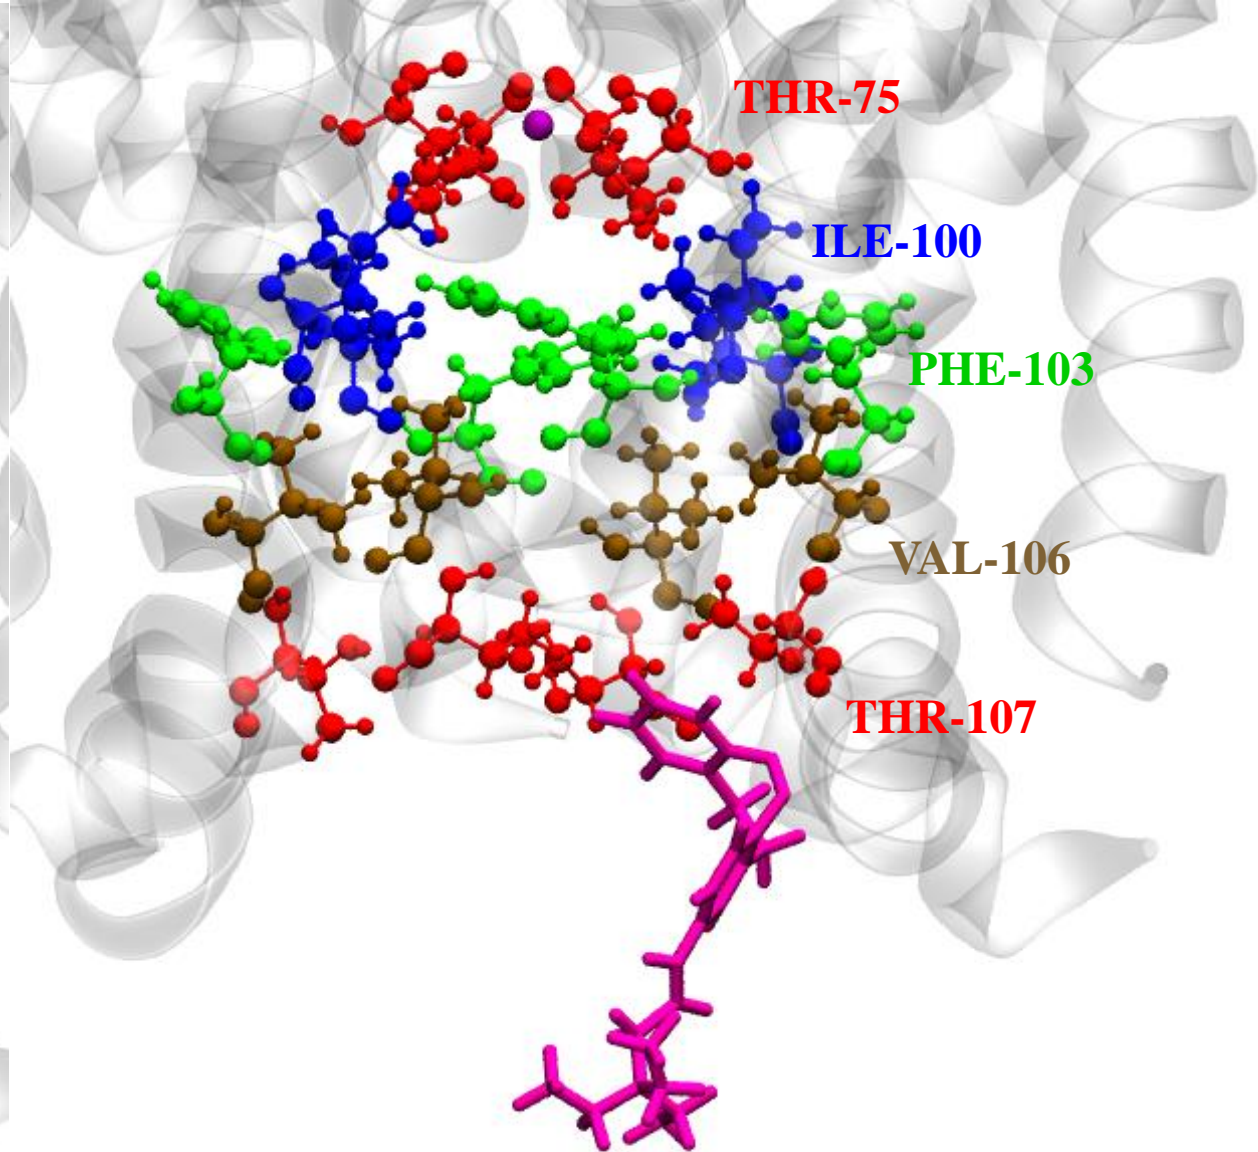

**Z1 (C4)**

**MM/PBSA Binding energy = -10.2 kcal/mol<sup>4</sup>**

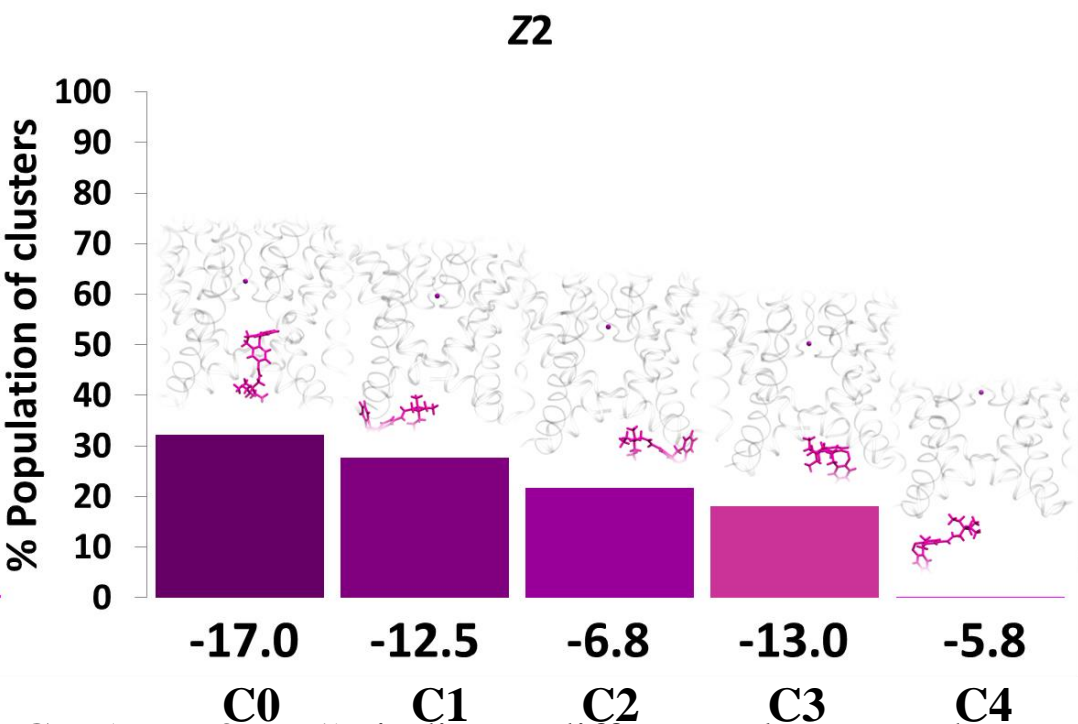

$C_n$  ( $n = 0 - 1$ ) indicate different clusters. The percentage population of clusters is given on the Y-axis. Corresponding binding energy (B.E.) is given in kcal/mol on the X-axis. Protein is represented in new cartoon model with  $K^+$ -ion (purple ball), and Z-LAB-TEA is shown in stick model (magenta colour).

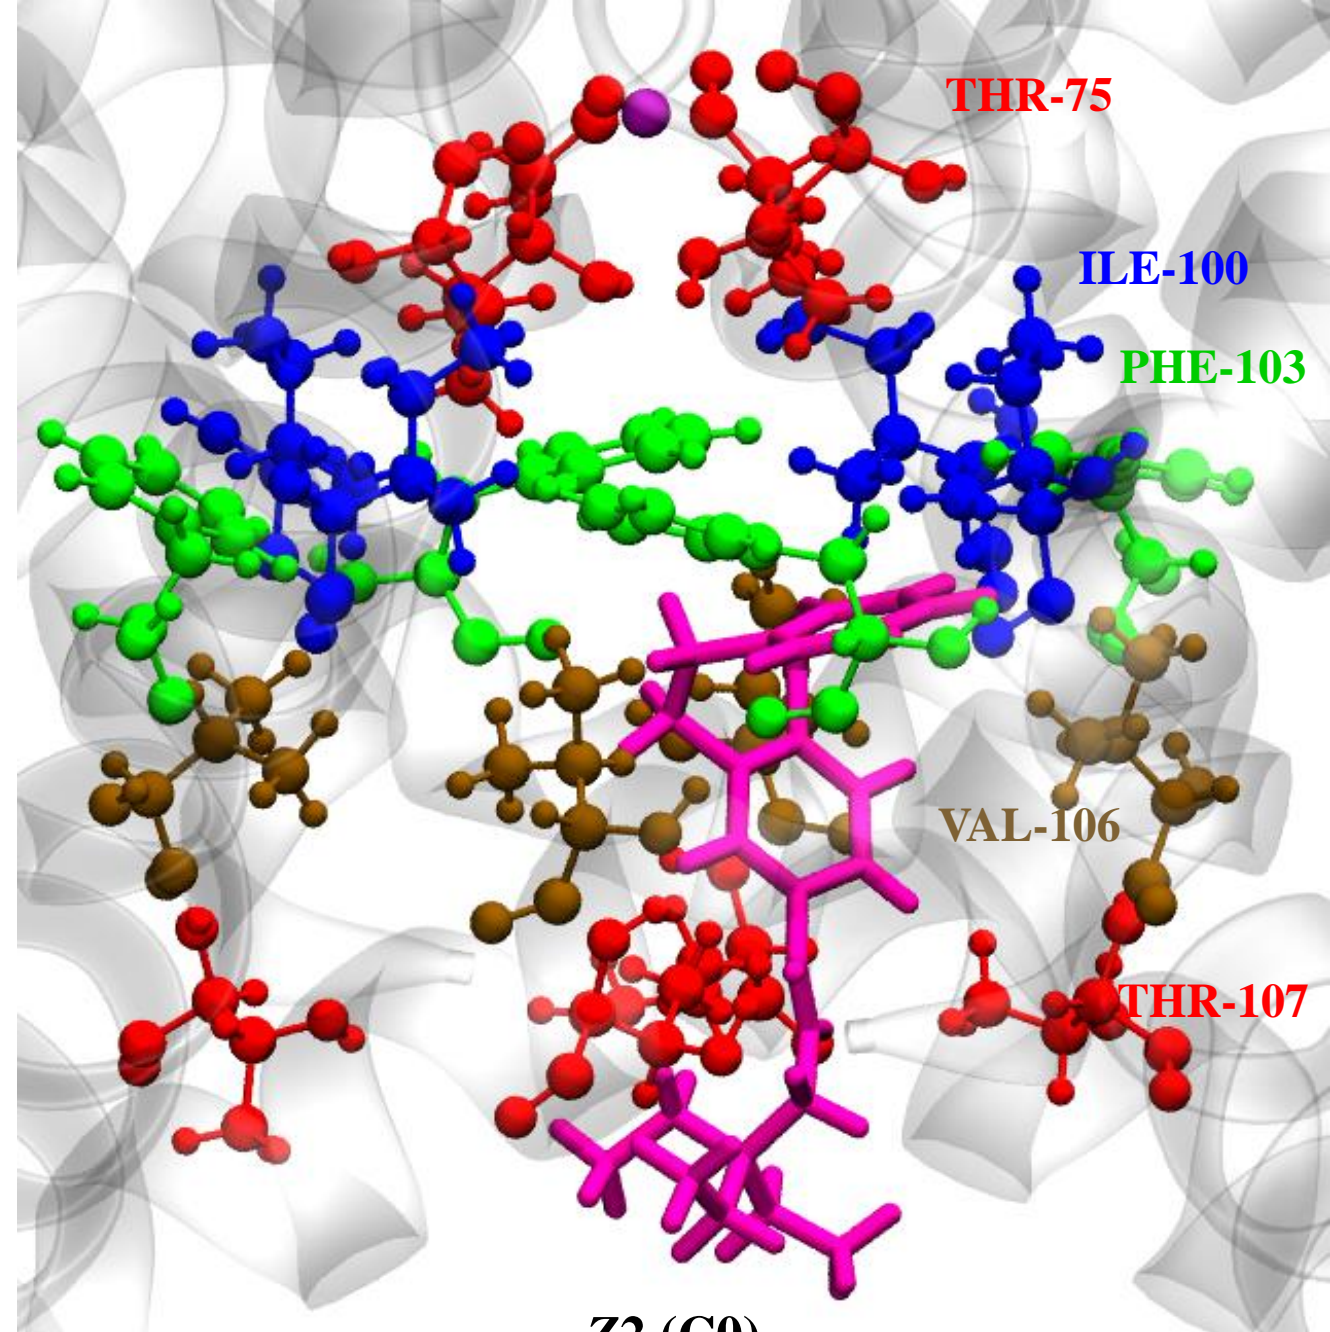

**MM/PBSA Binding energy = -17.0 kcal/mol<sup>5</sup>**

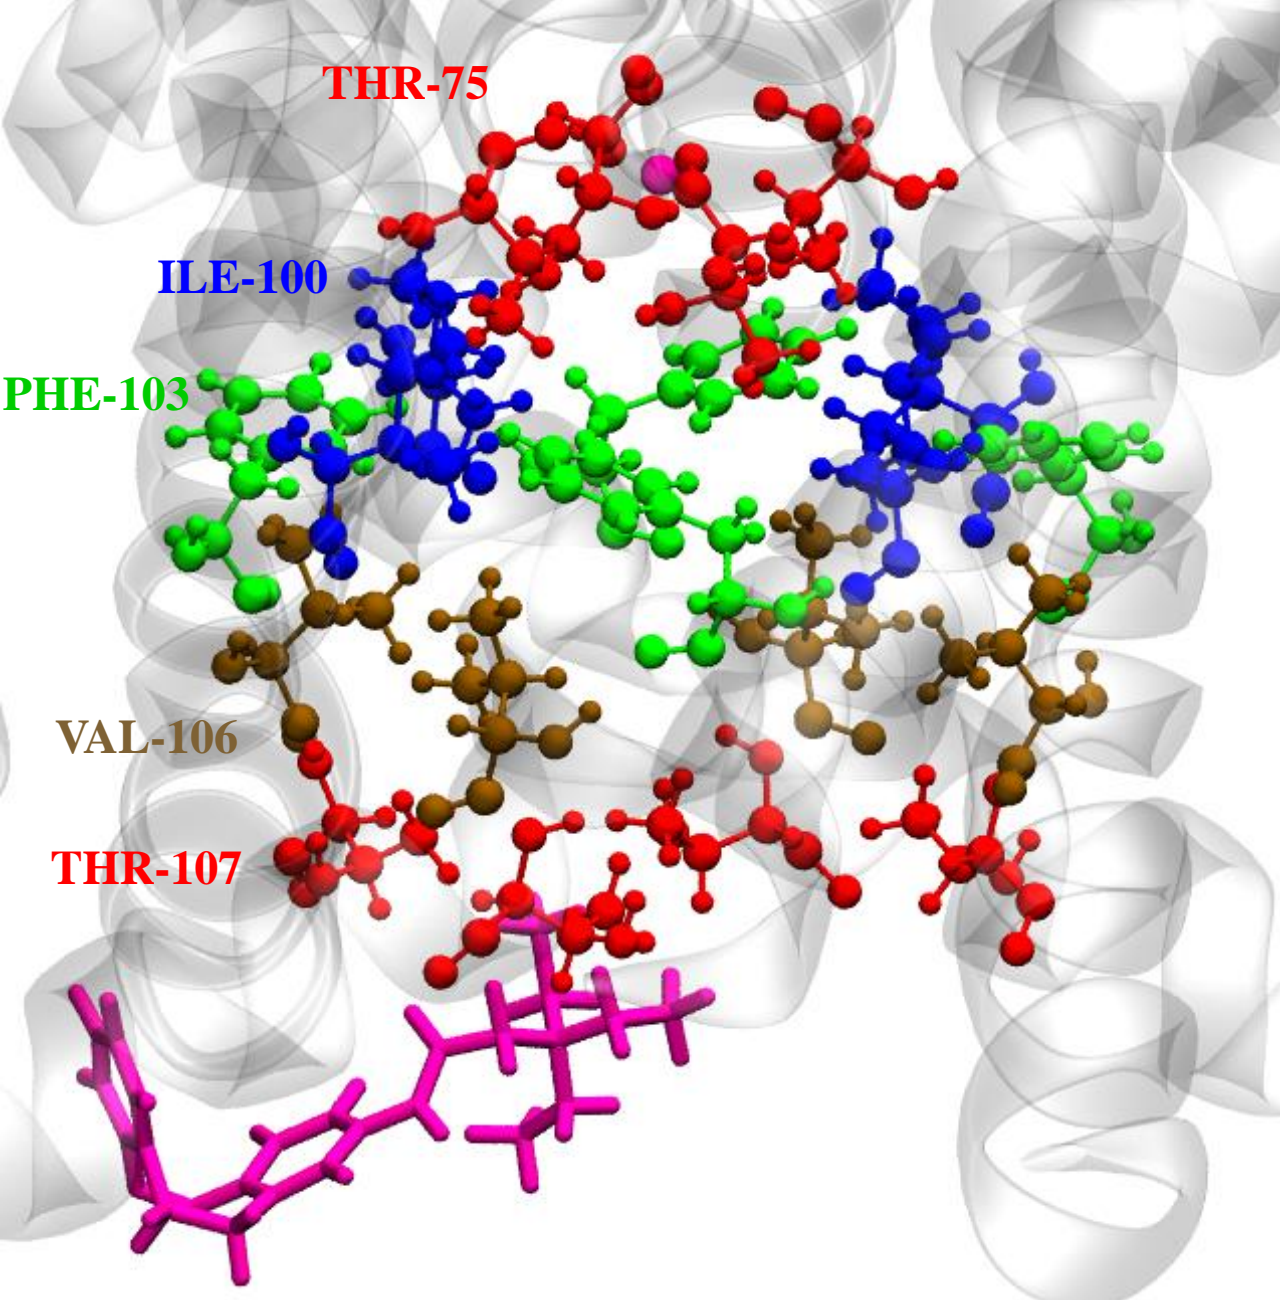

**Z2 (C1)**

**MM/PBSA Binding energy = -12.5 kcal/mol**

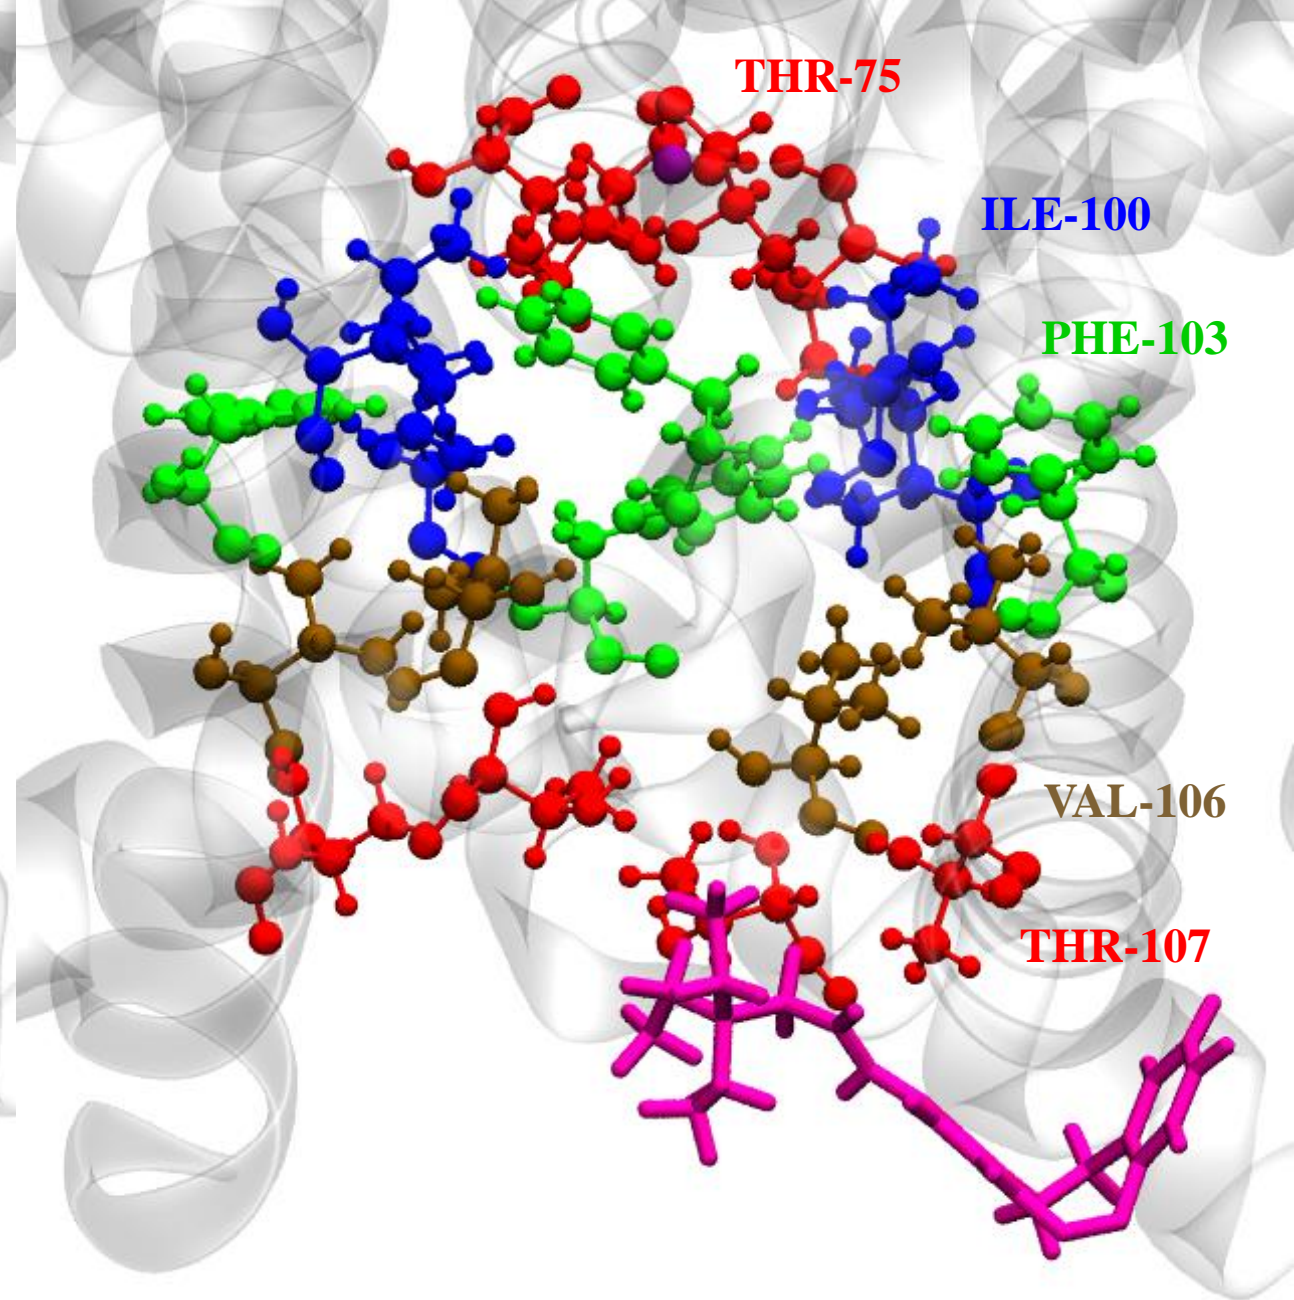

**Z2 (C2)**

**MM/PBSA Binding energy = -6.8 kcal/mol**

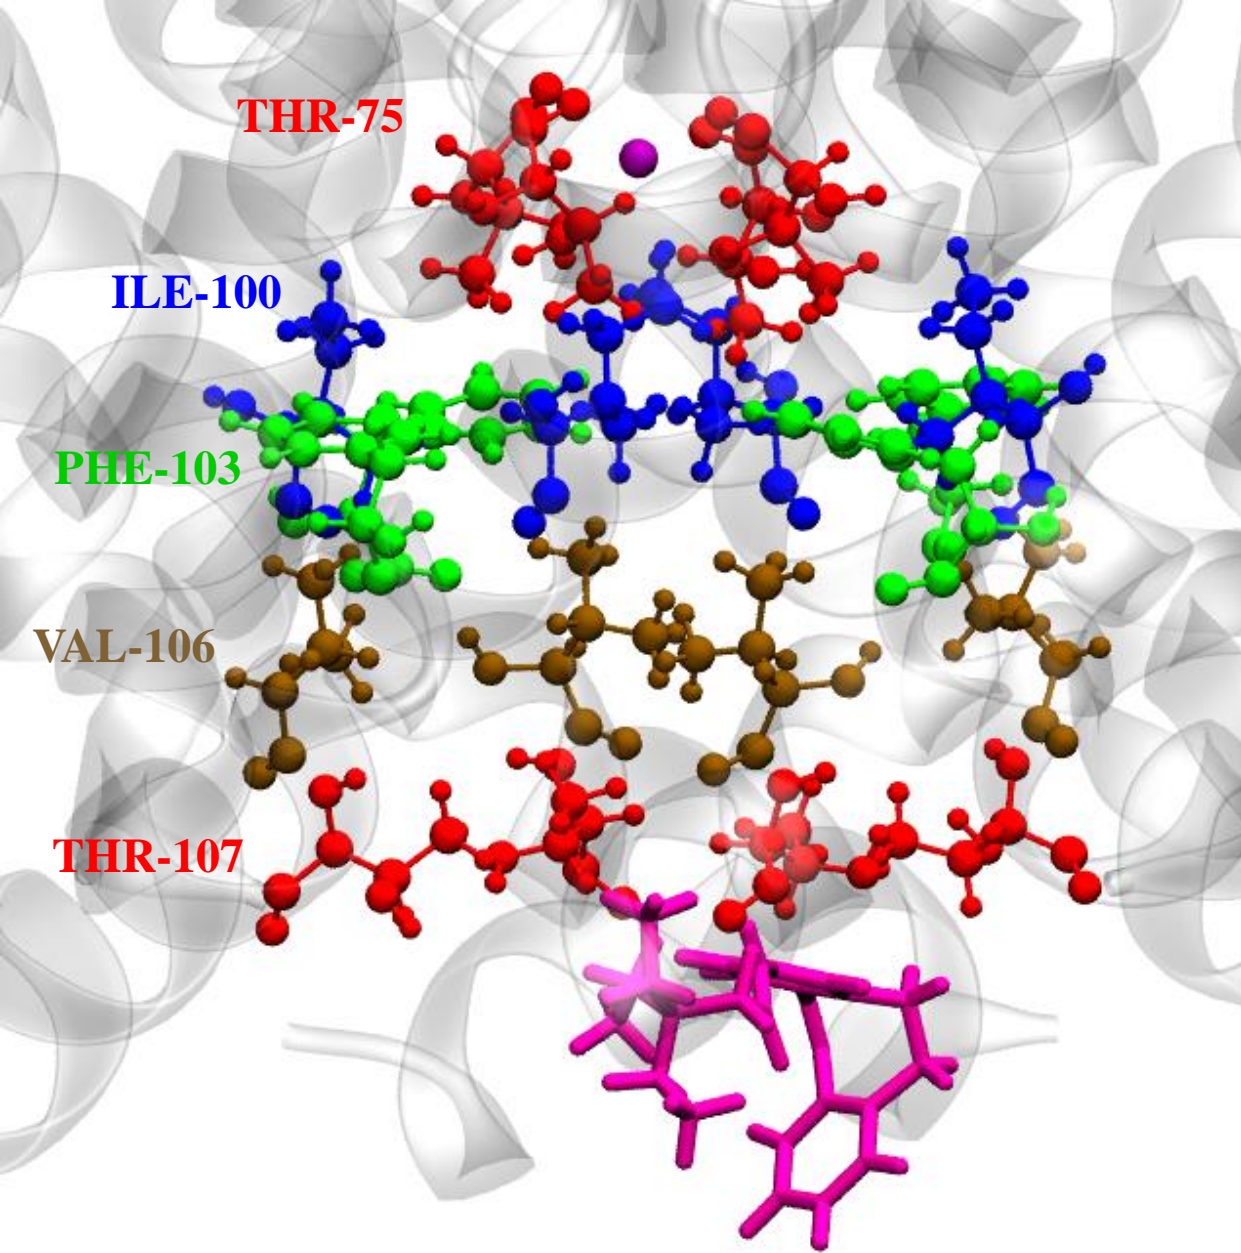

**Z2 (C3)**

**MM/PBSA Binding energy = -13.0 kcal/mol**

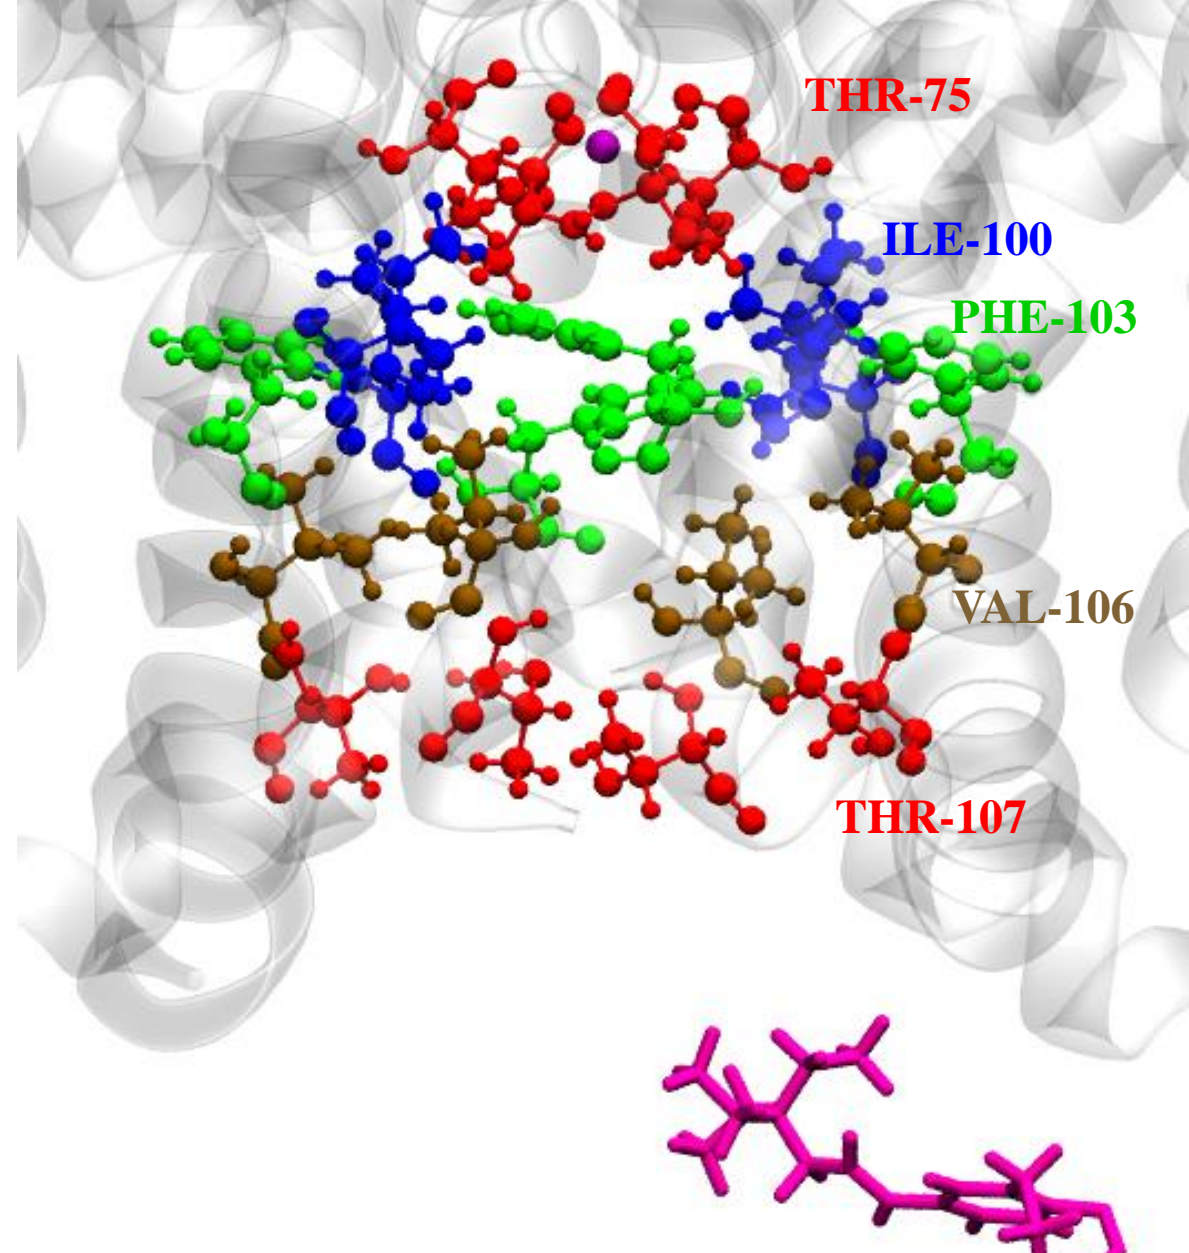

**Z2 (C4)**

**MM/PBSA Binding energy = -5.8 kcal/mol**

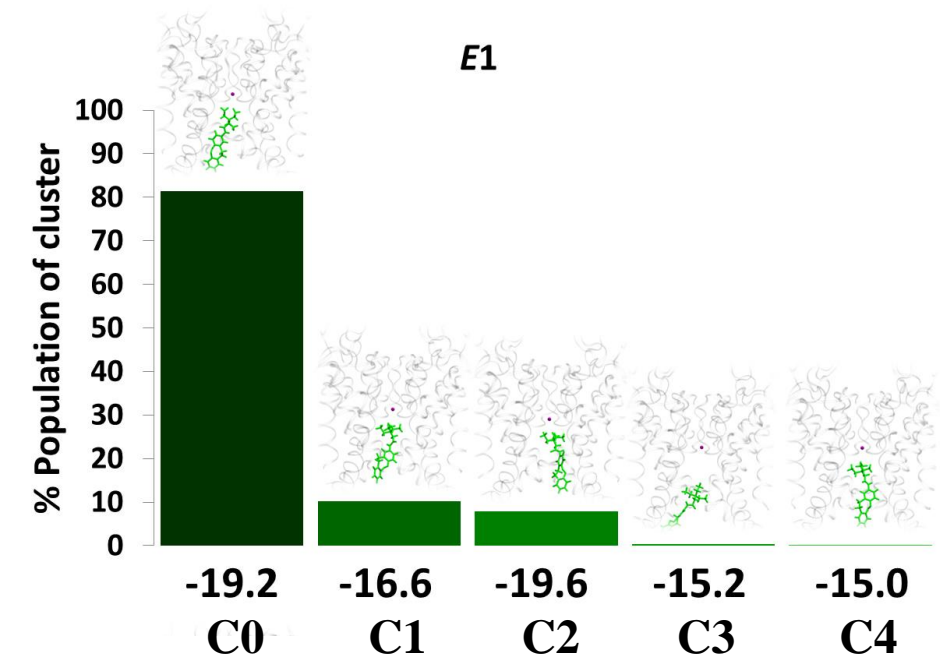

C<sub>n</sub> (n = 0 – 1) indicate different clusters. The percentage population of clusters is given on the Y-axis. Corresponding binding energy (B.E.) is given in kcal/mol on the X-axis. Protein is represented in new cartoon model with K<sup>+</sup>-ion (purple ball), and *E*-LAB-TEA is shown in stick model (green colour).

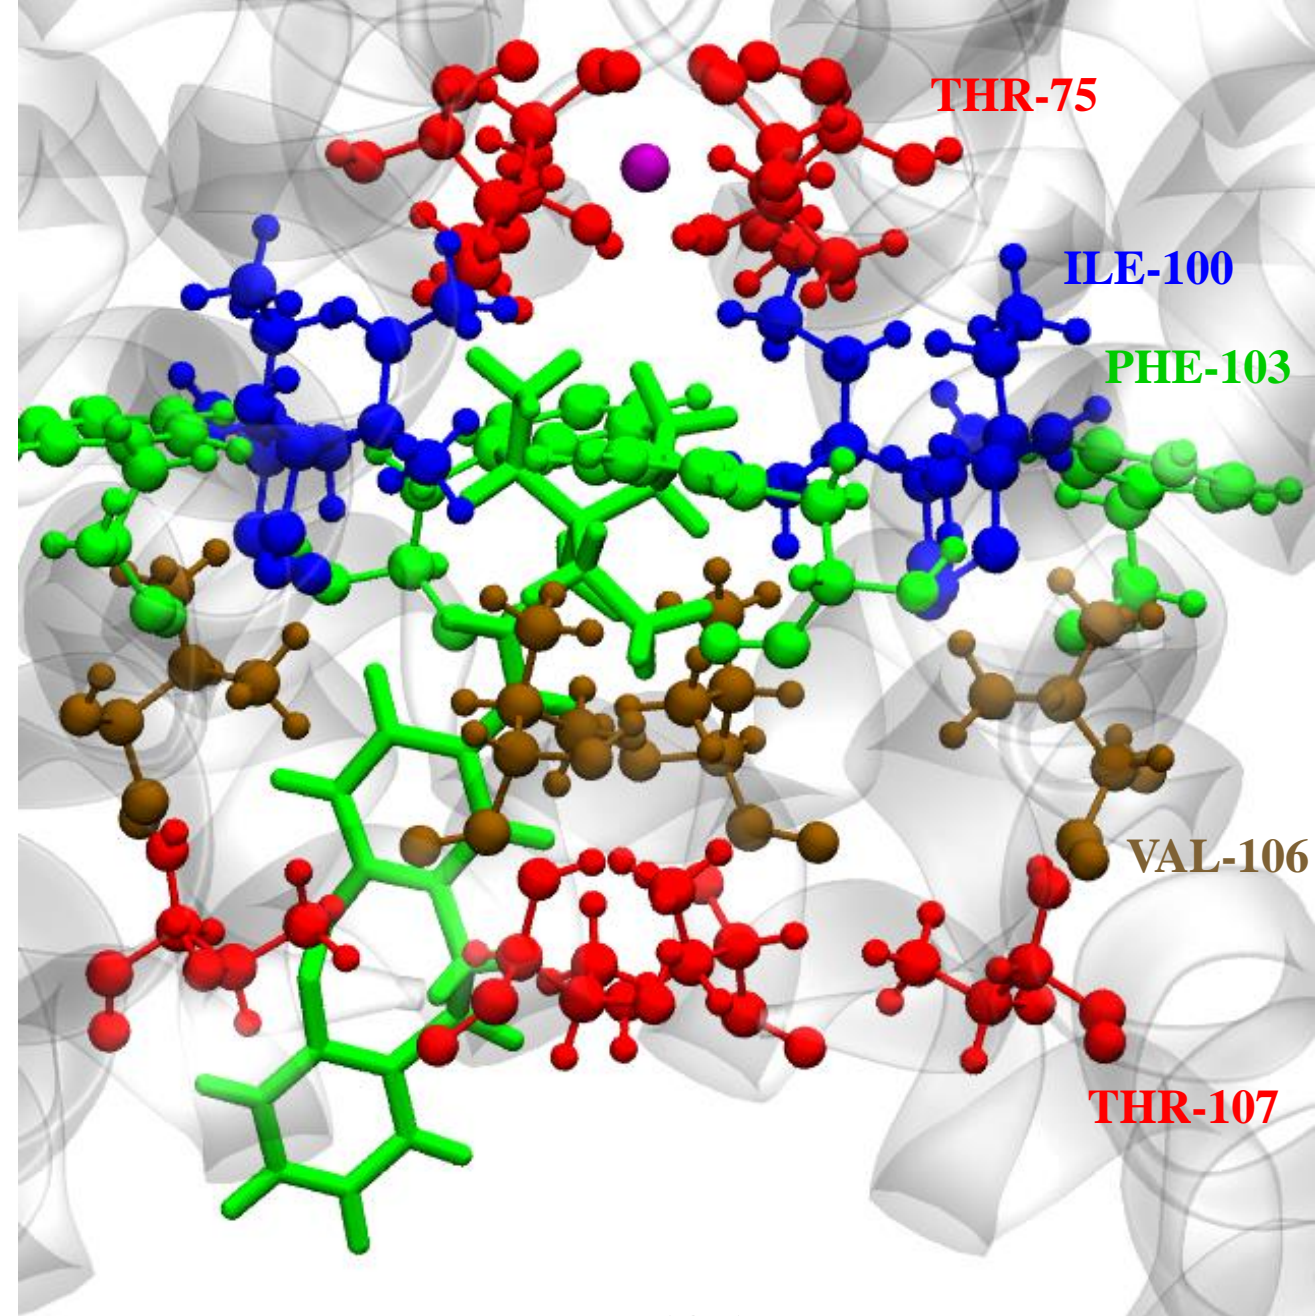

*E1* (C0)  
MM/PBSA Binding energy = -19.2 kcal/mol<sup>8</sup>



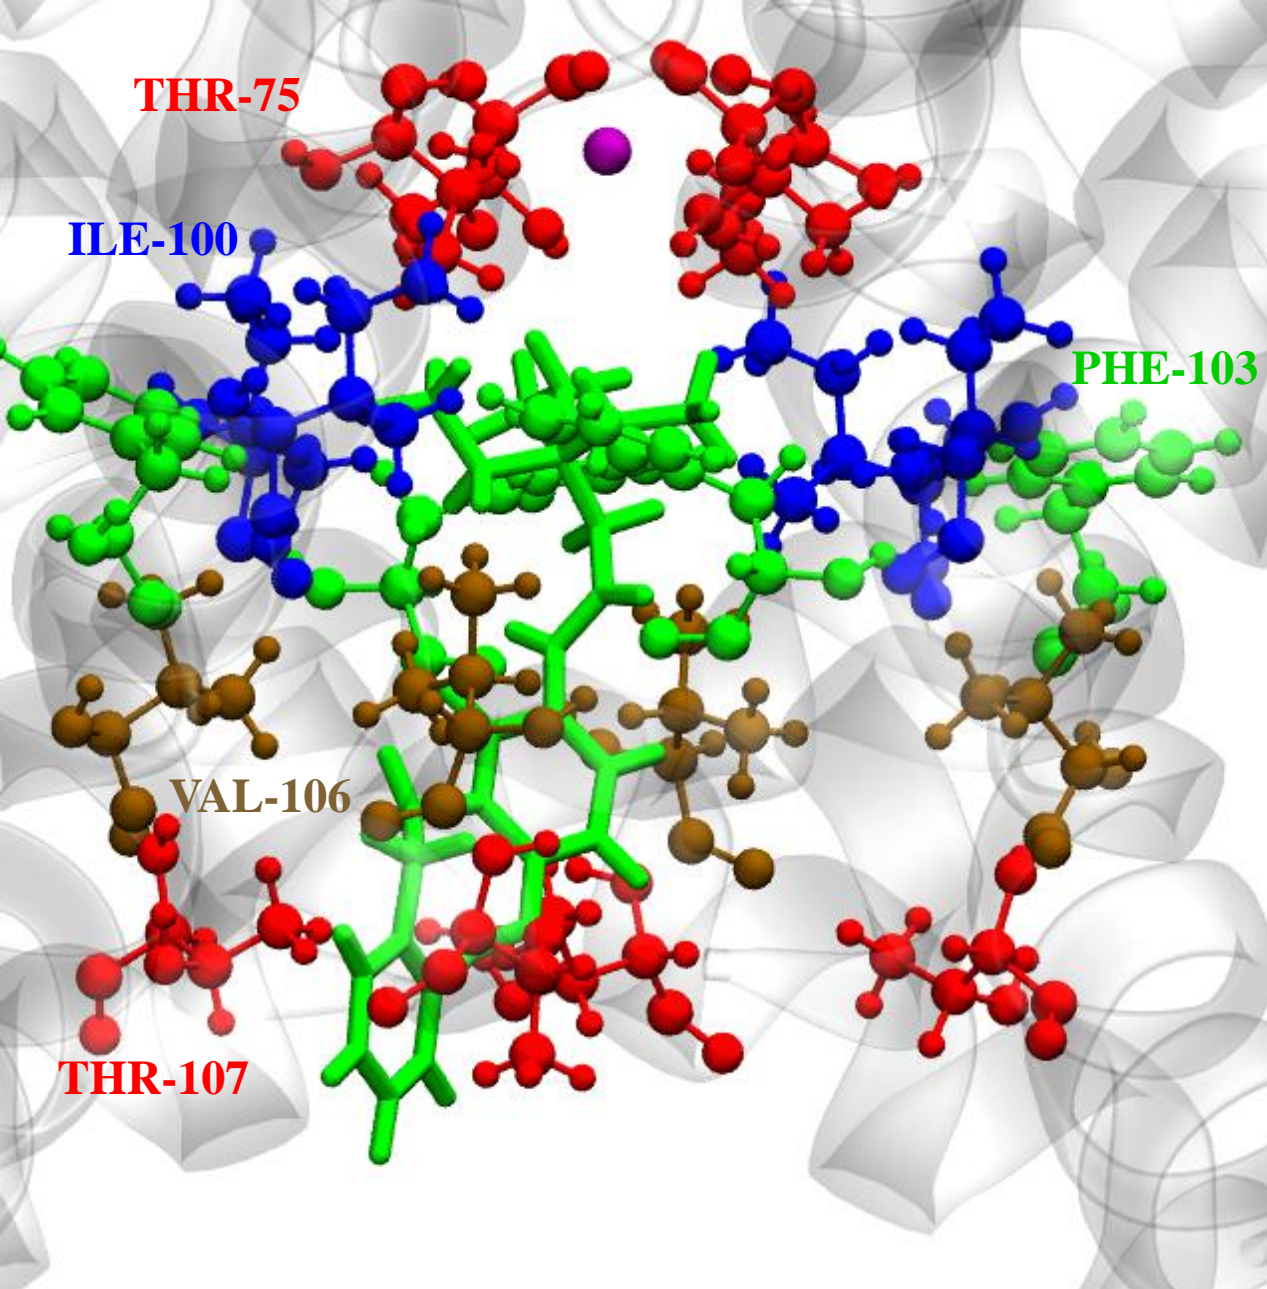

*E1 (C1)*

MM/PBSA Binding energy = -16.6 kcal/mol

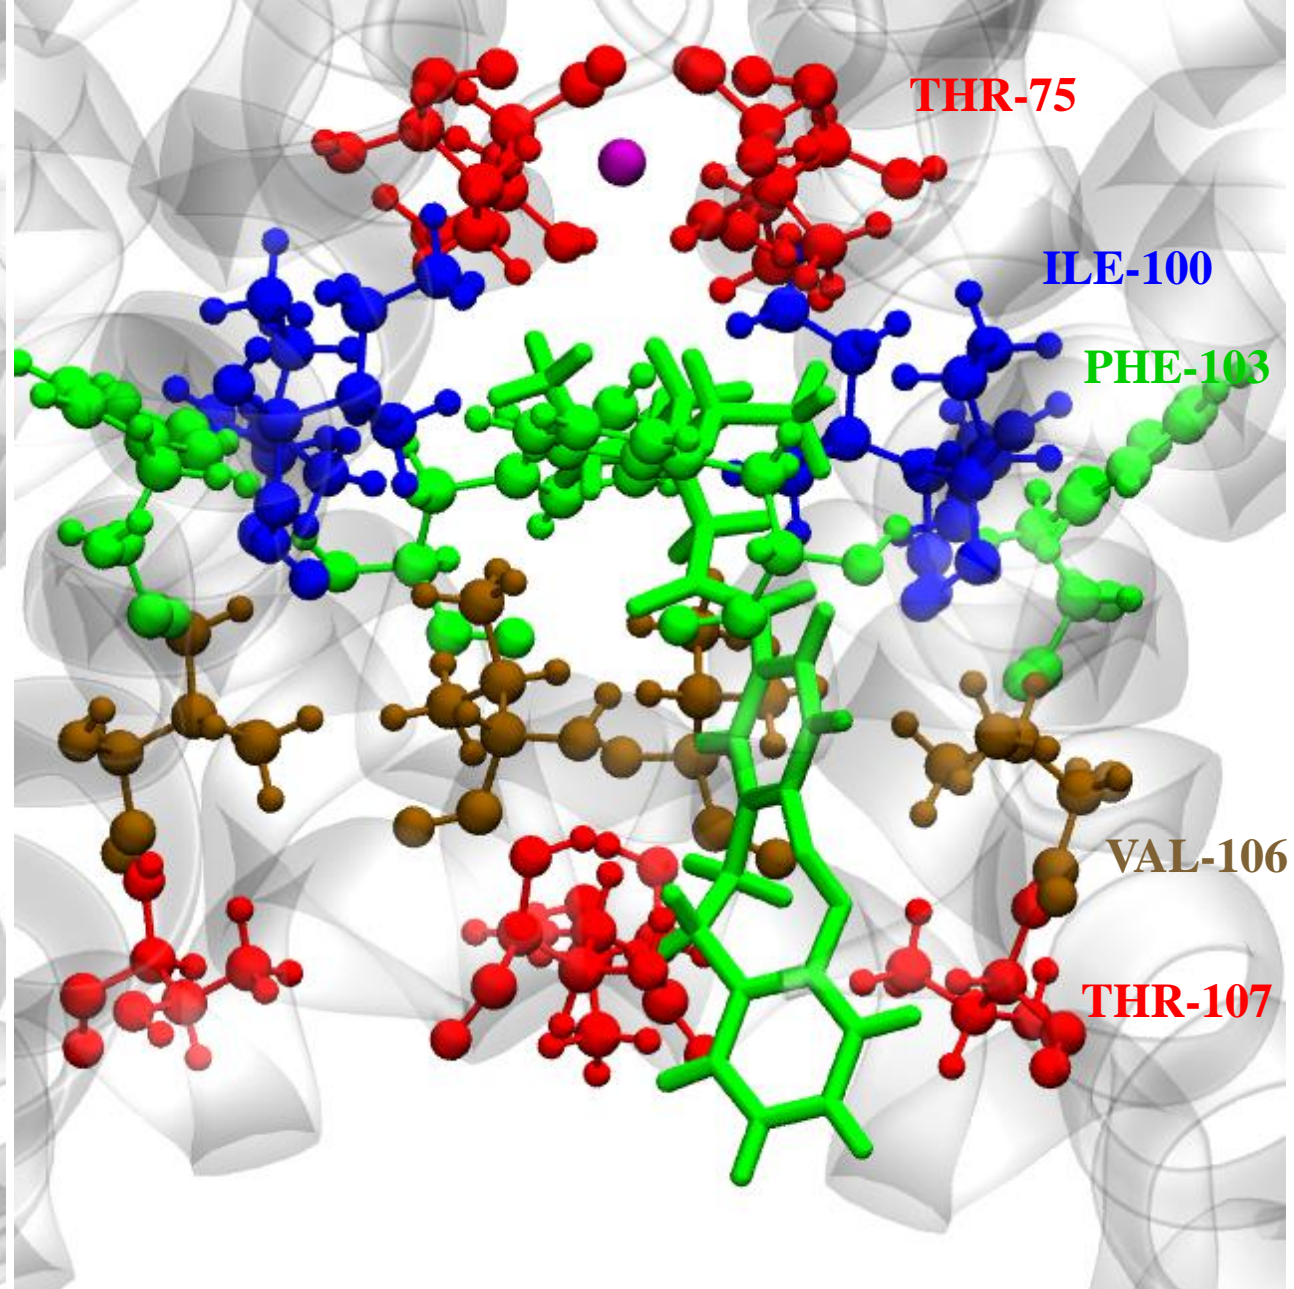

*E1 (C2)*

MM/PBSA Binding energy = -19.6 kcal/mol<sup>9</sup>

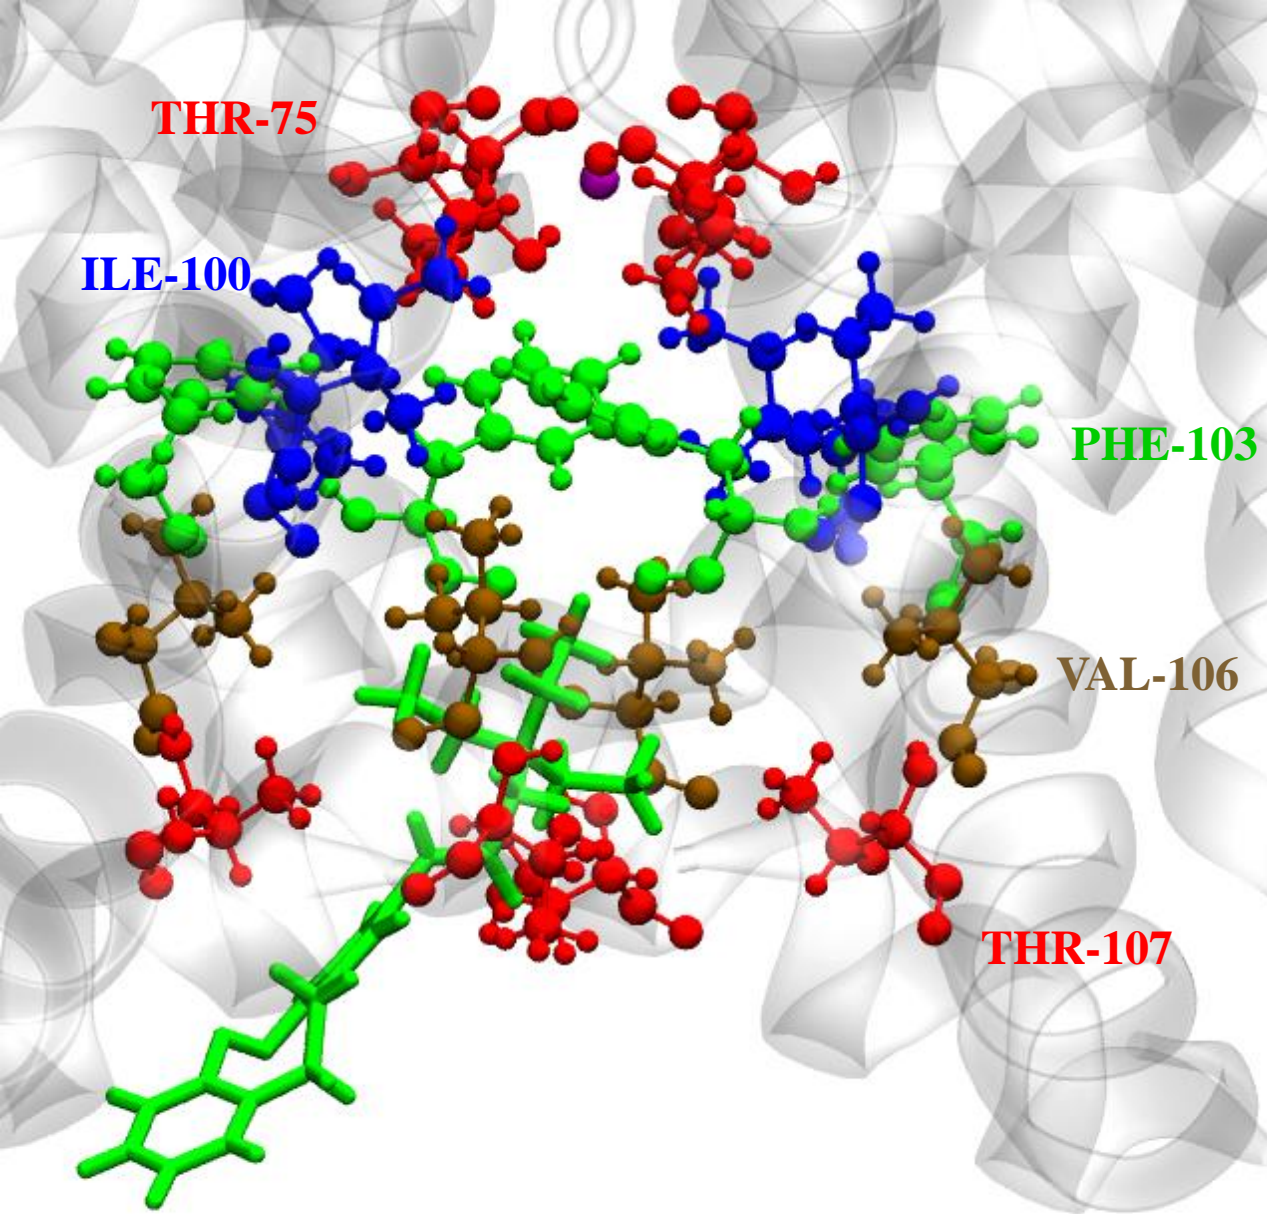

***E1 (C3)***

**MM/PBSA Binding energy = -15.2 kcal/mol**

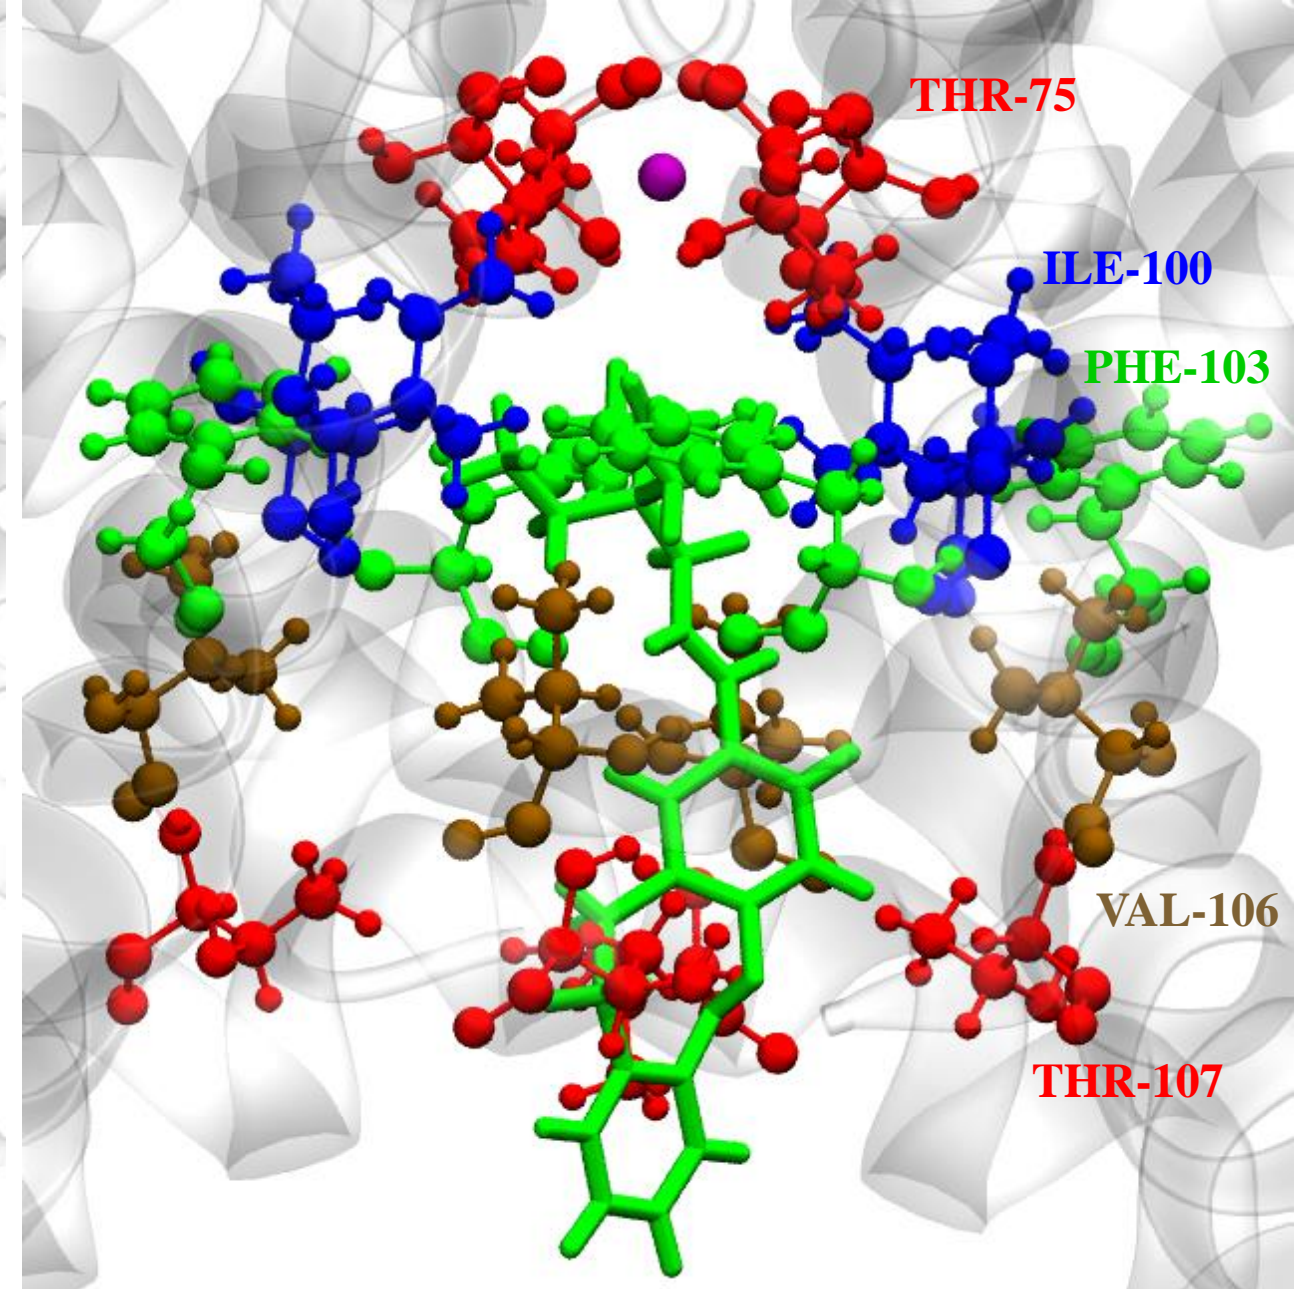

***E1 (C4)***

**MM/PBSA Binding energy = -15.0 kcal/mol<sup>10</sup>**

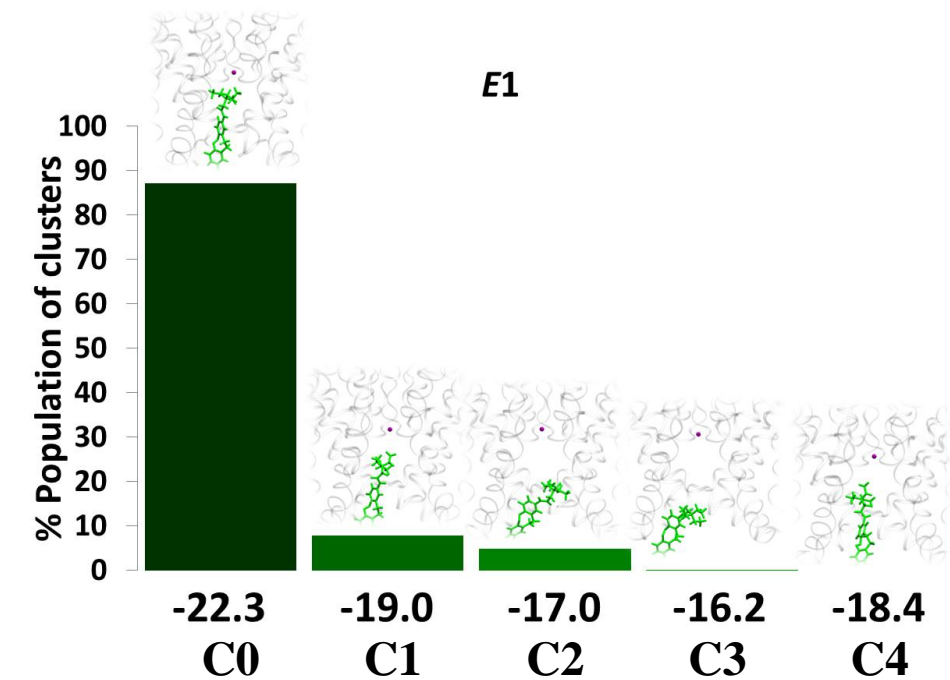

C<sub>n</sub> (n = 0 – 1) indicate different clusters. The percentage population of clusters is given on the Y-axis. Corresponding binding energy (B.E.) is given in kcal/mol on the X-axis. Protein is represented in new cartoon model with K<sup>+</sup>-ion (purple ball), and *E*-LAB-TEA is shown in stick model (green colour).

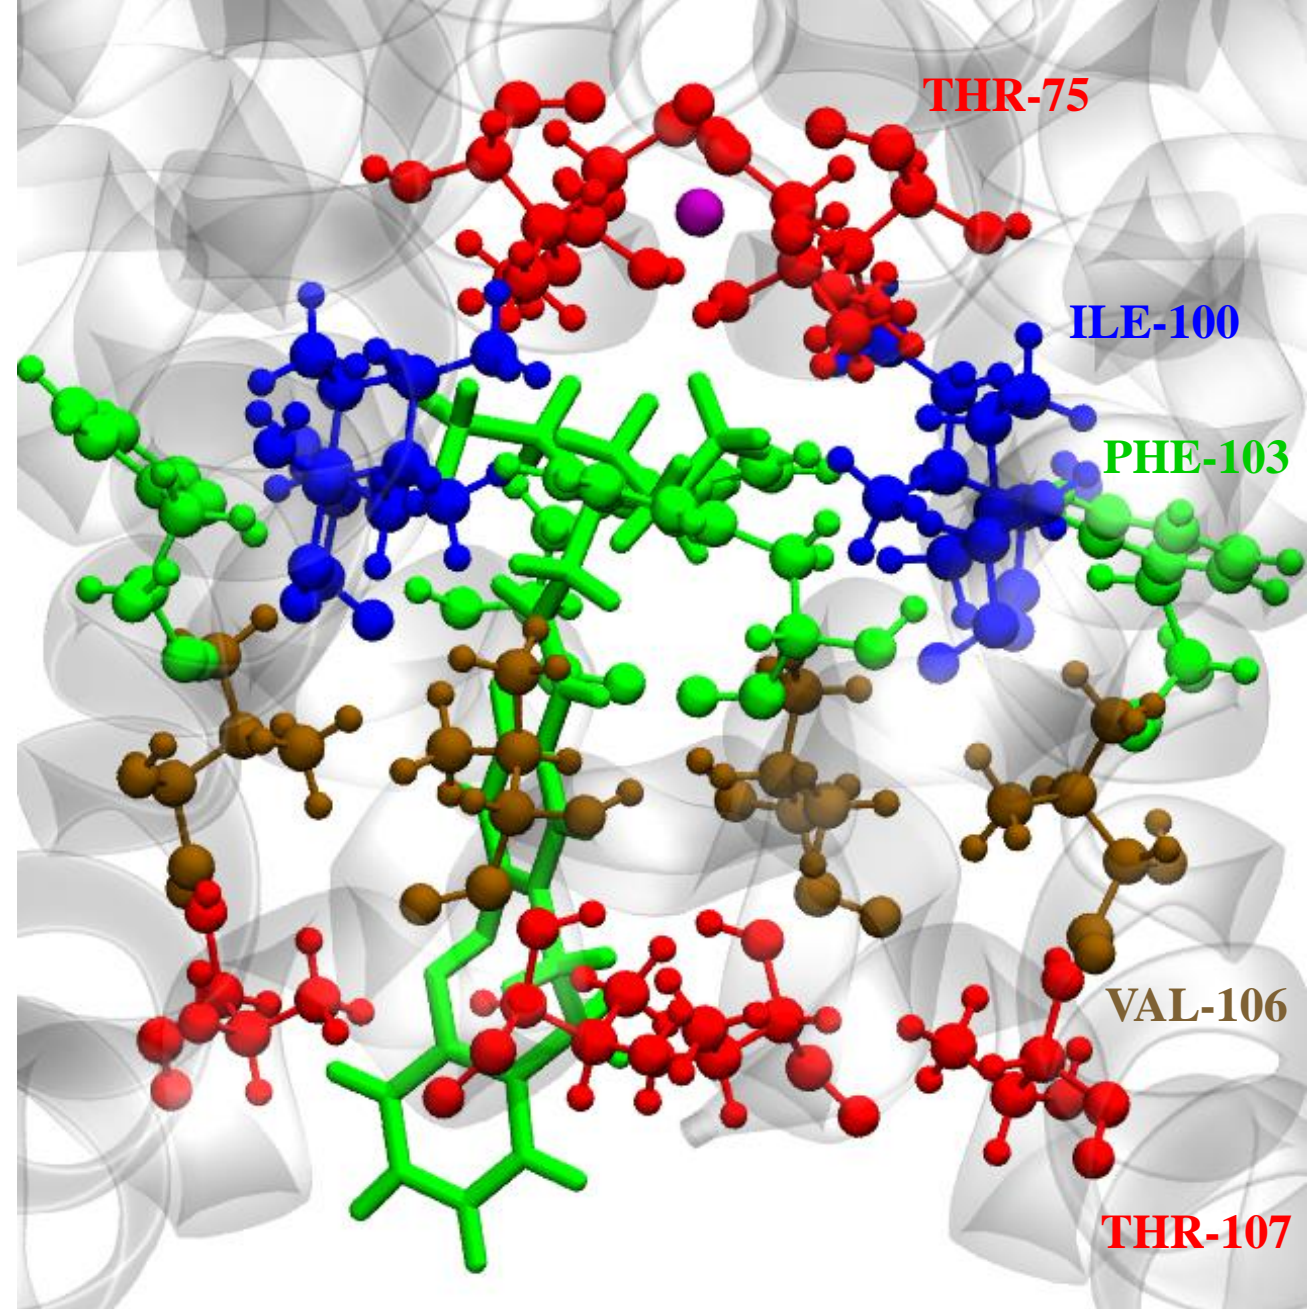

*E*1 (C0)  
MM/PBSA Binding energy = -22.3 kcal/mol<sup>11</sup>

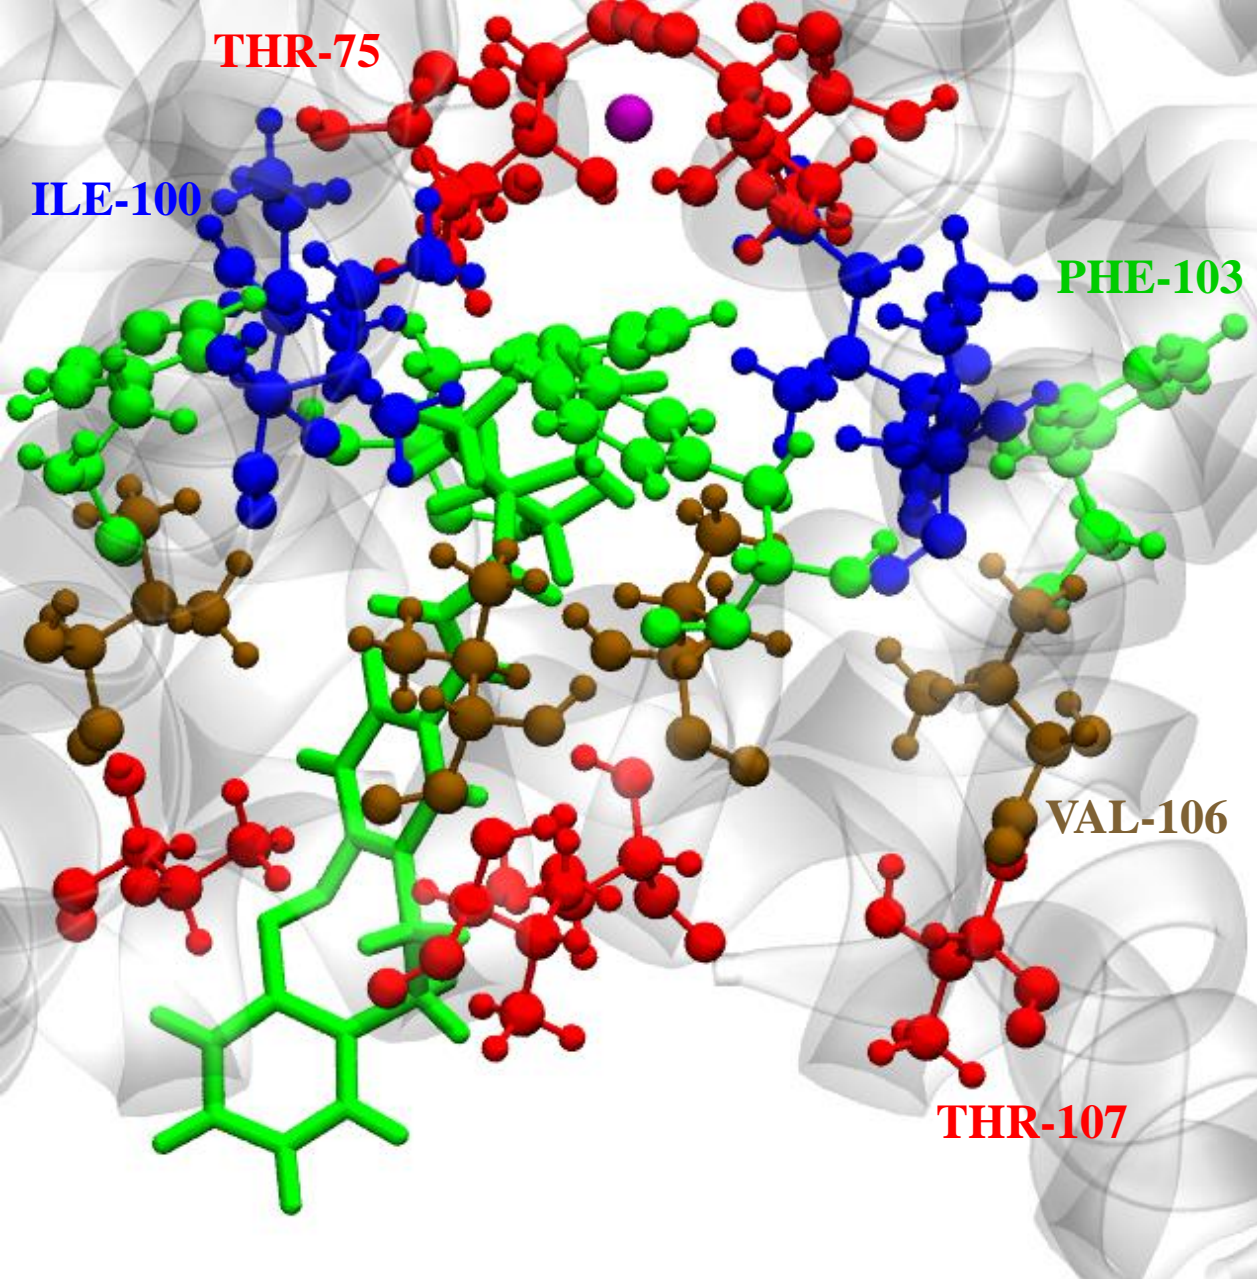

*E1 (C1)*

**MM/PBSA Binding energy = -19.0 kcal/mol**

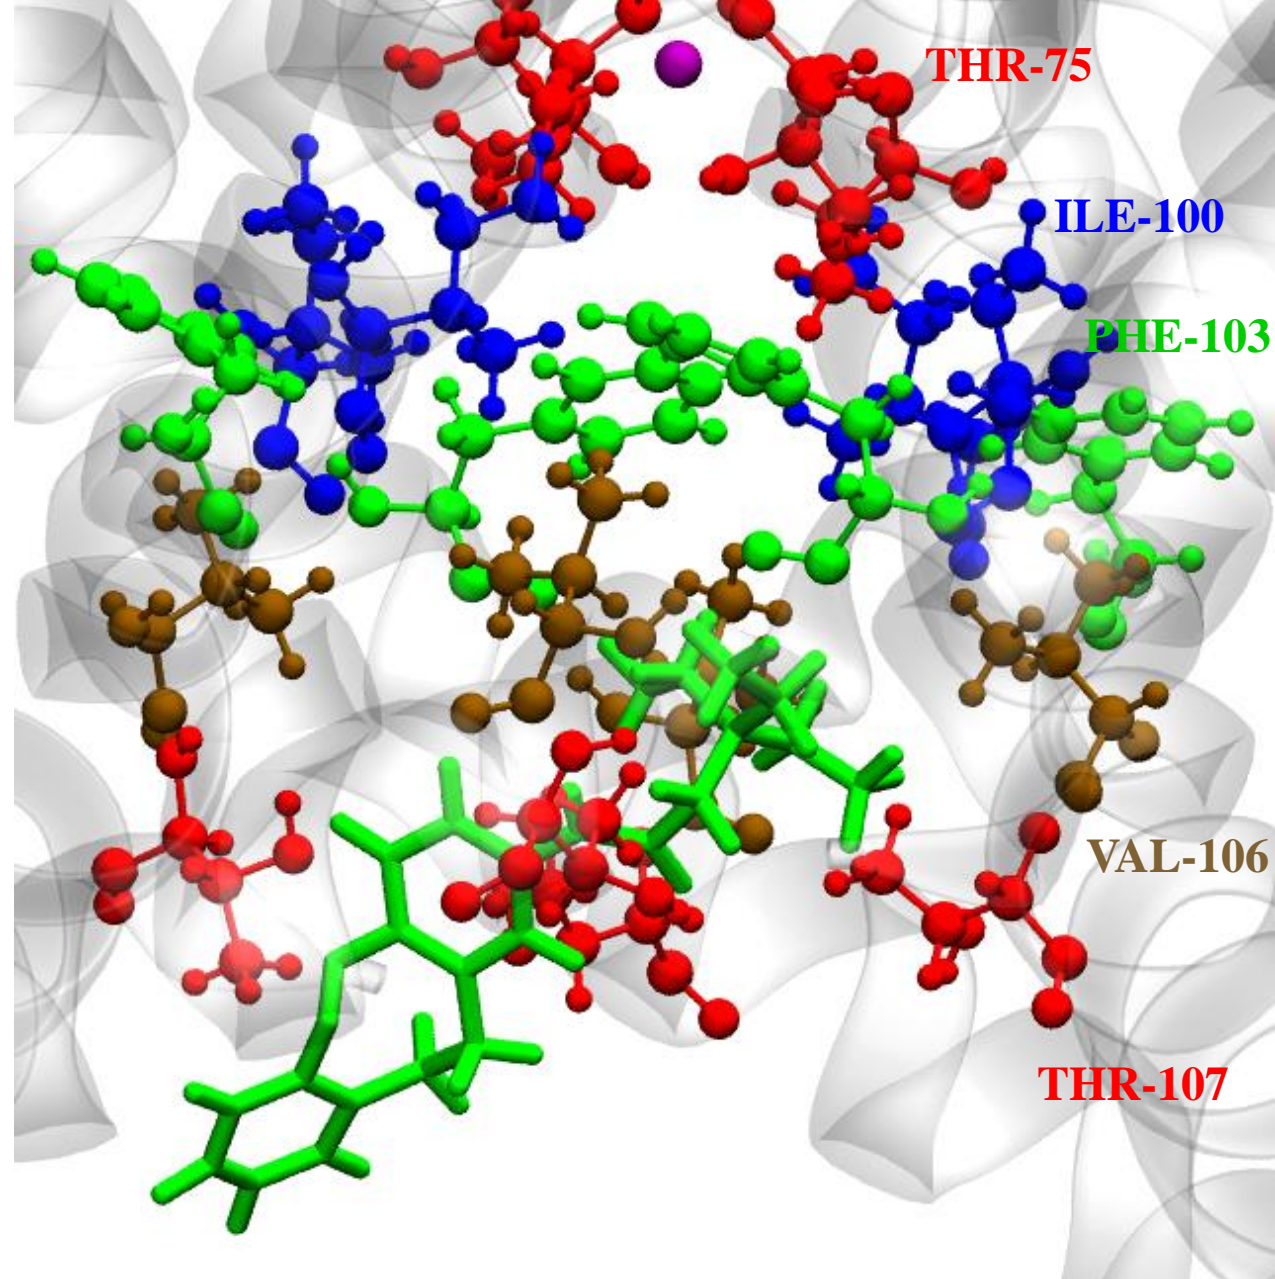

*E1 (C2)*

**MM/PBSA Binding energy = -17.0 kcal/mol<sup>12</sup>**

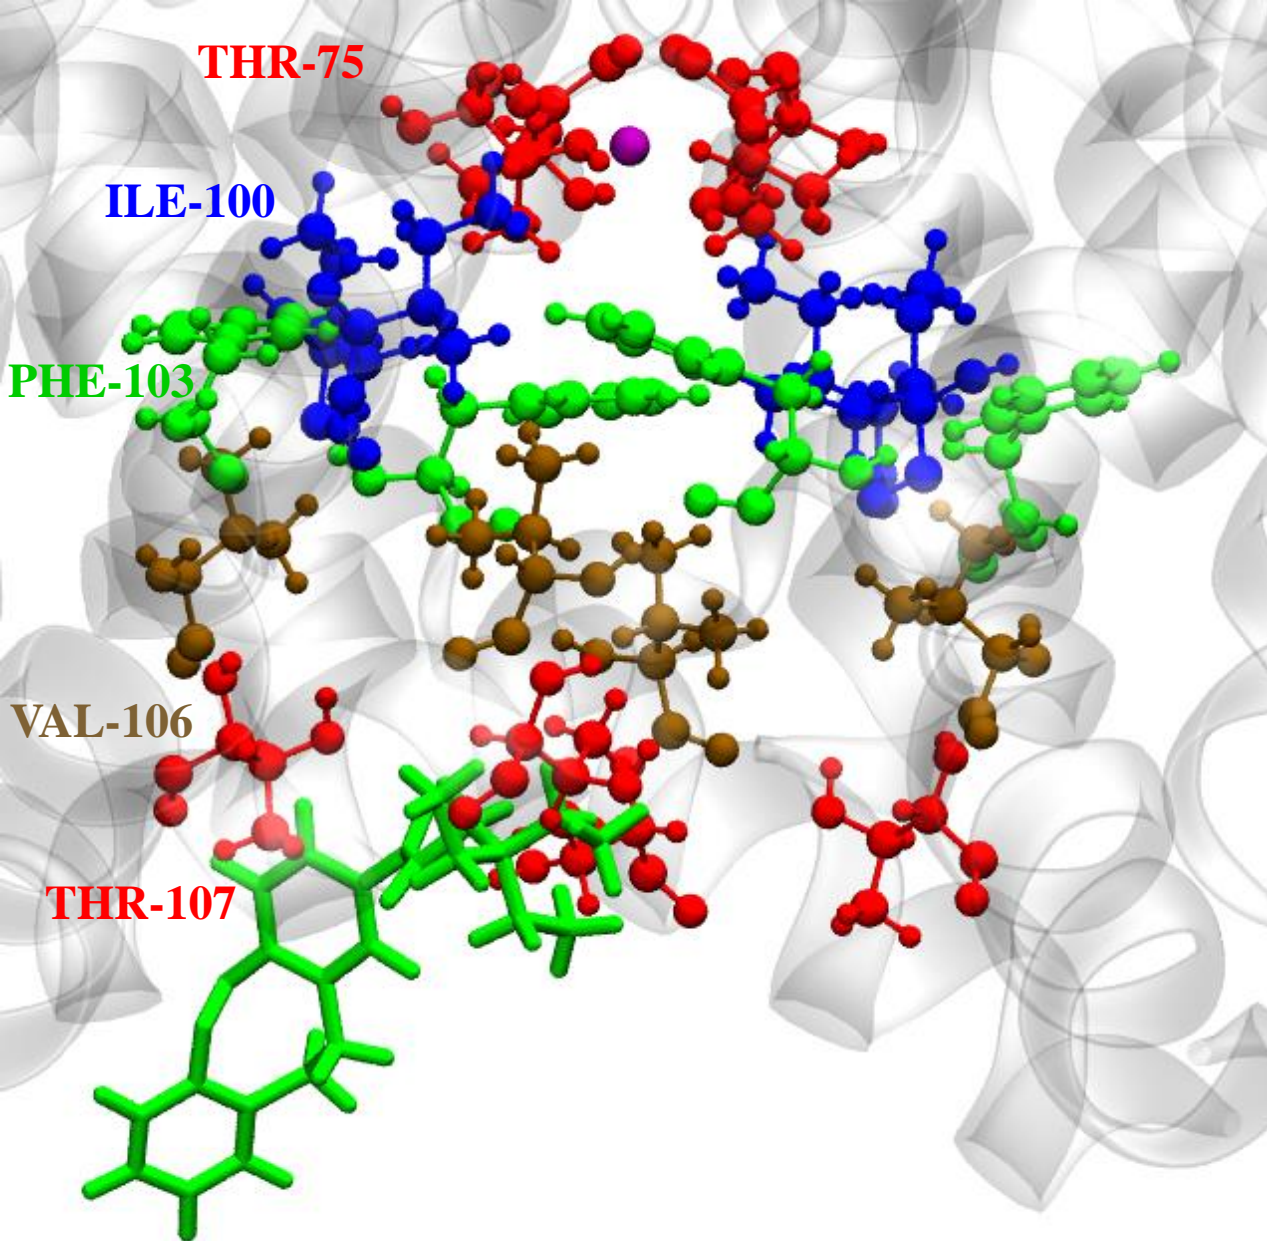

*E1 (C3)*

MM/PBSA Binding energy = -16.2 kcal/mol

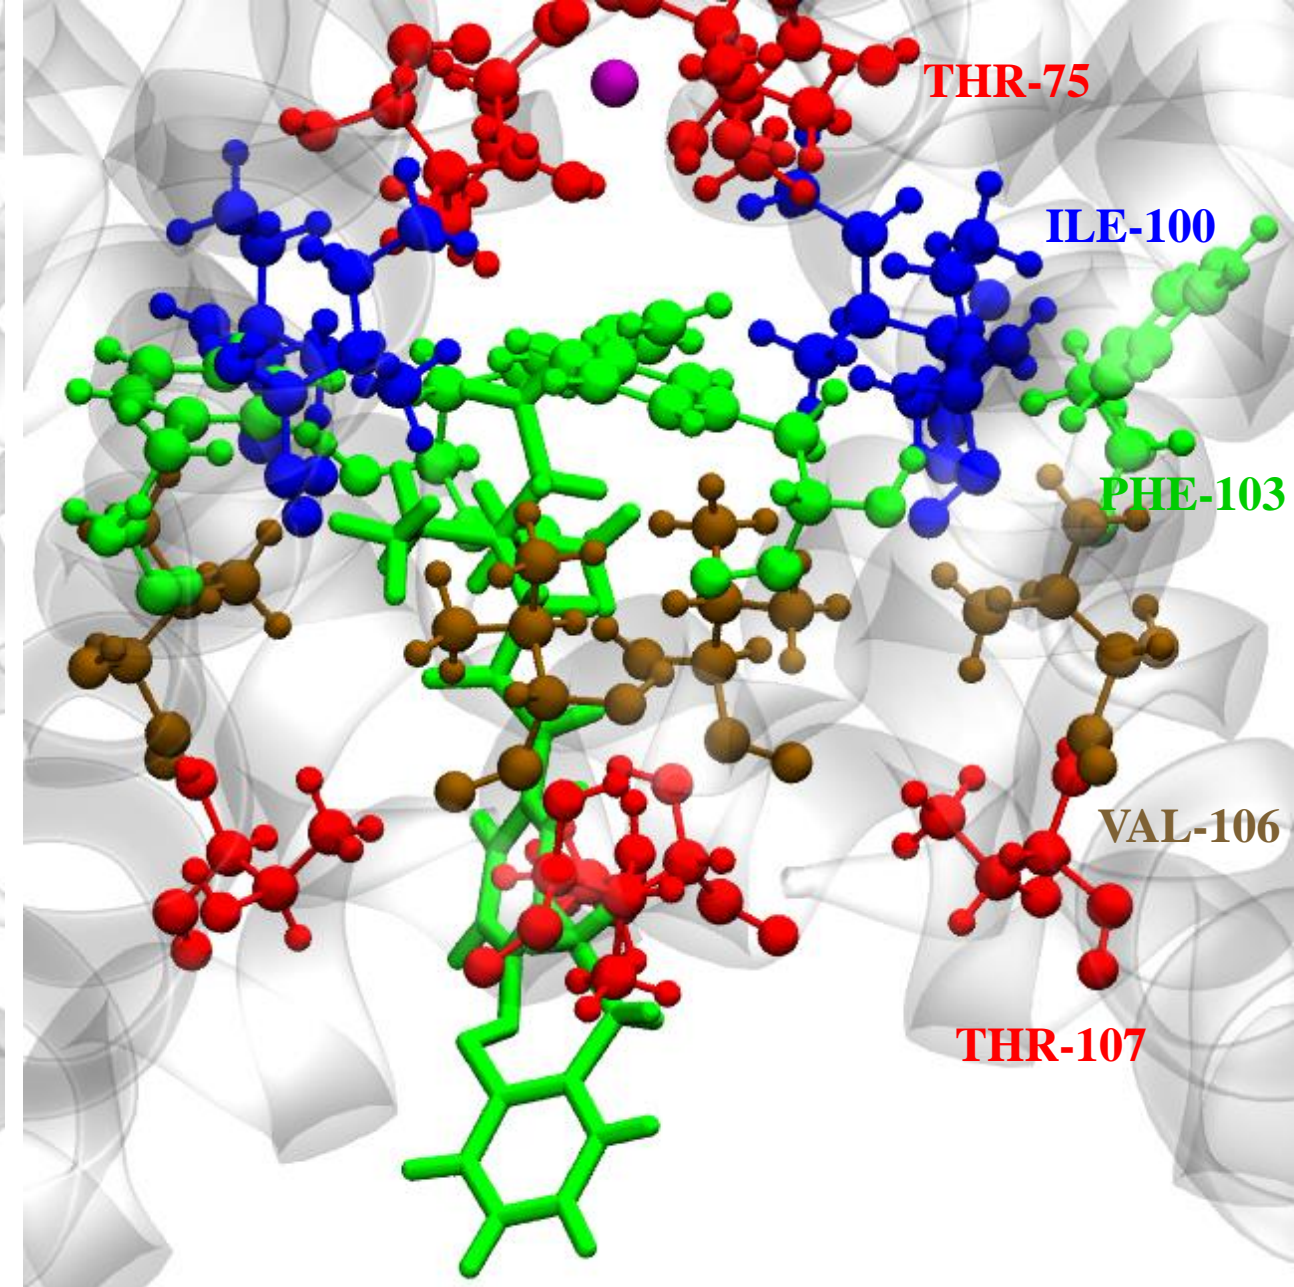

*E1 (C4)*

MM/PBSA Binding energy = -18.4 kcal/mol<sup>13</sup>

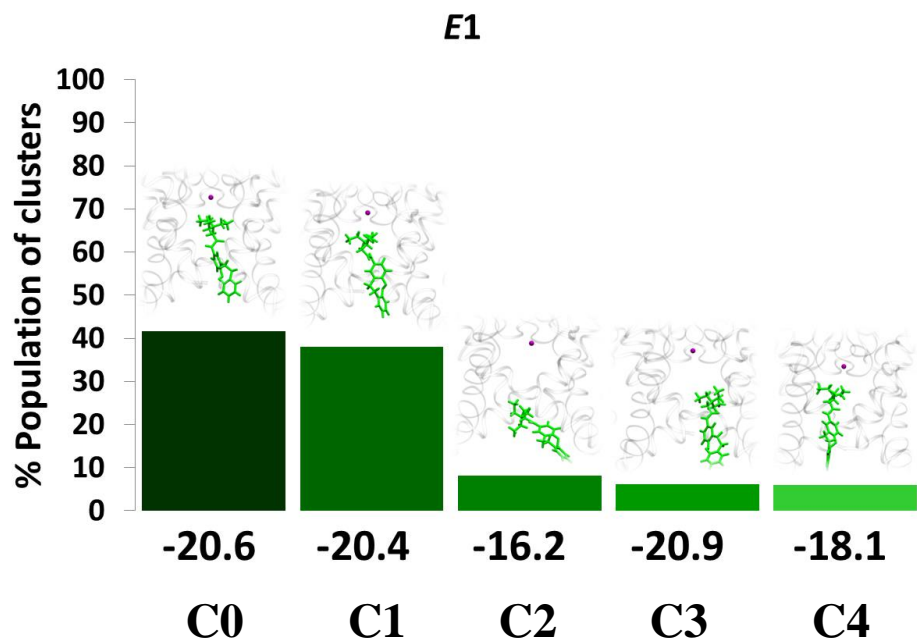

C<sub>n</sub> (n = 0 – 1) indicate different clusters. The percentage population of clusters is given on the Y-axis. Corresponding binding energy (B.E.) is given in kcal/mol on the X-axis. Protein is represented in new cartoon model with K<sup>+</sup>-ion (purple ball), and *E*-LAB-TEA is shown in stick model (green colour).

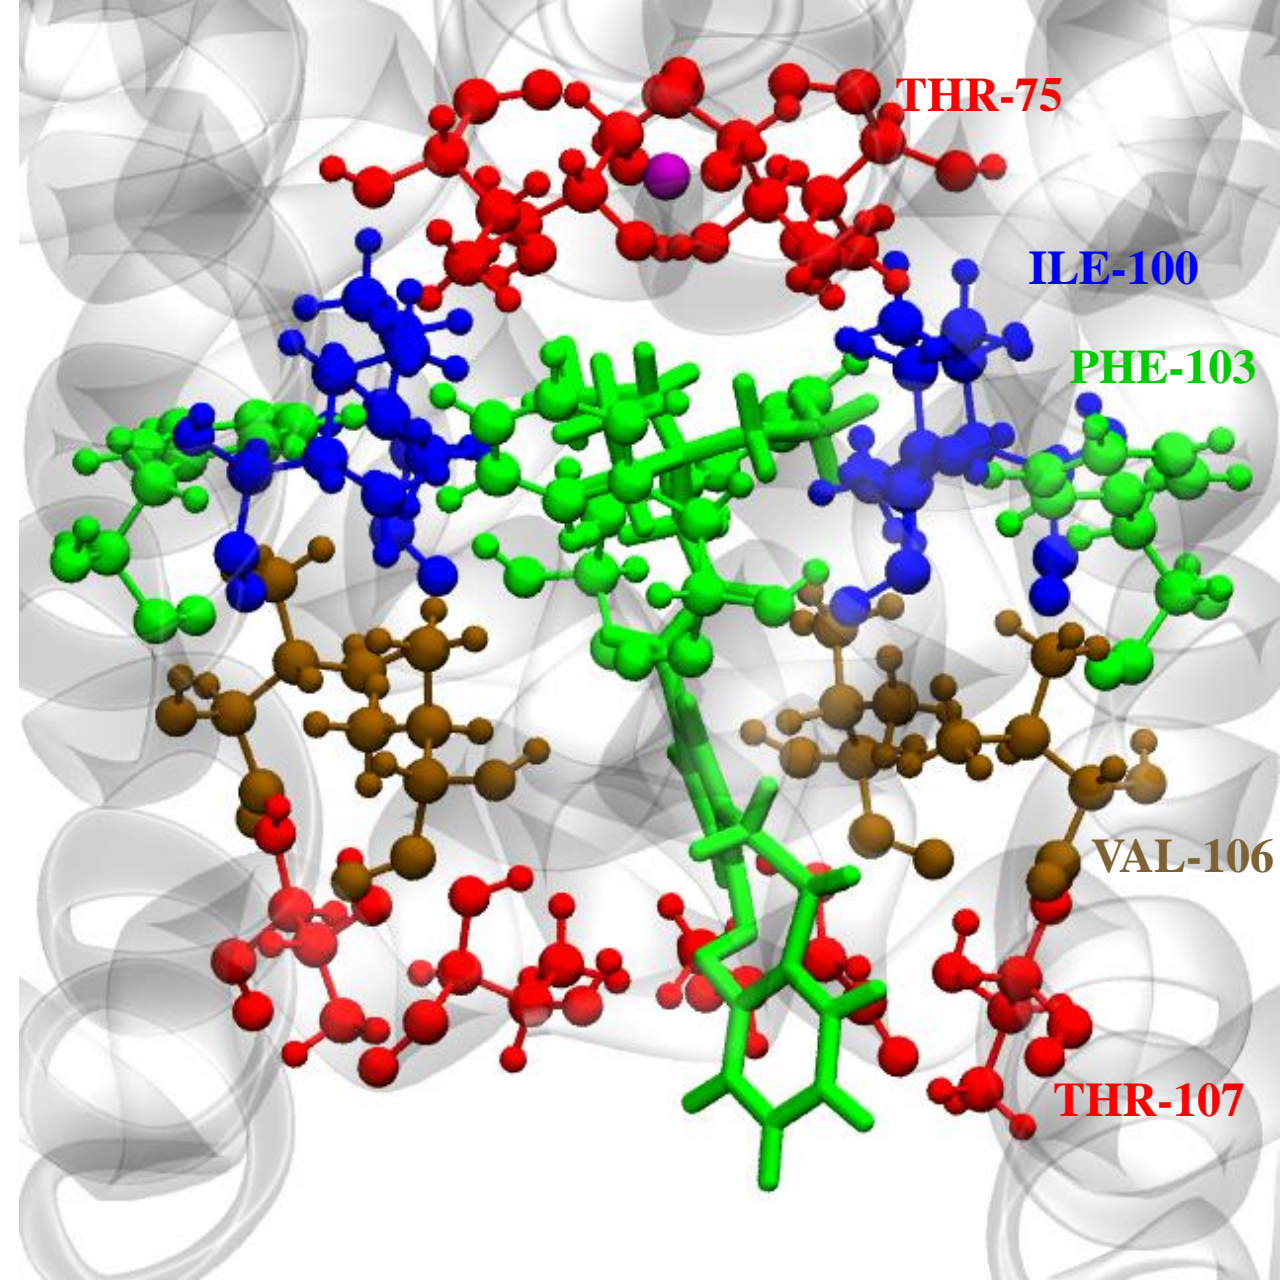

**E1 (C0)**  
**MM/PBSA Binding energy = -20.6 kcal/mol**

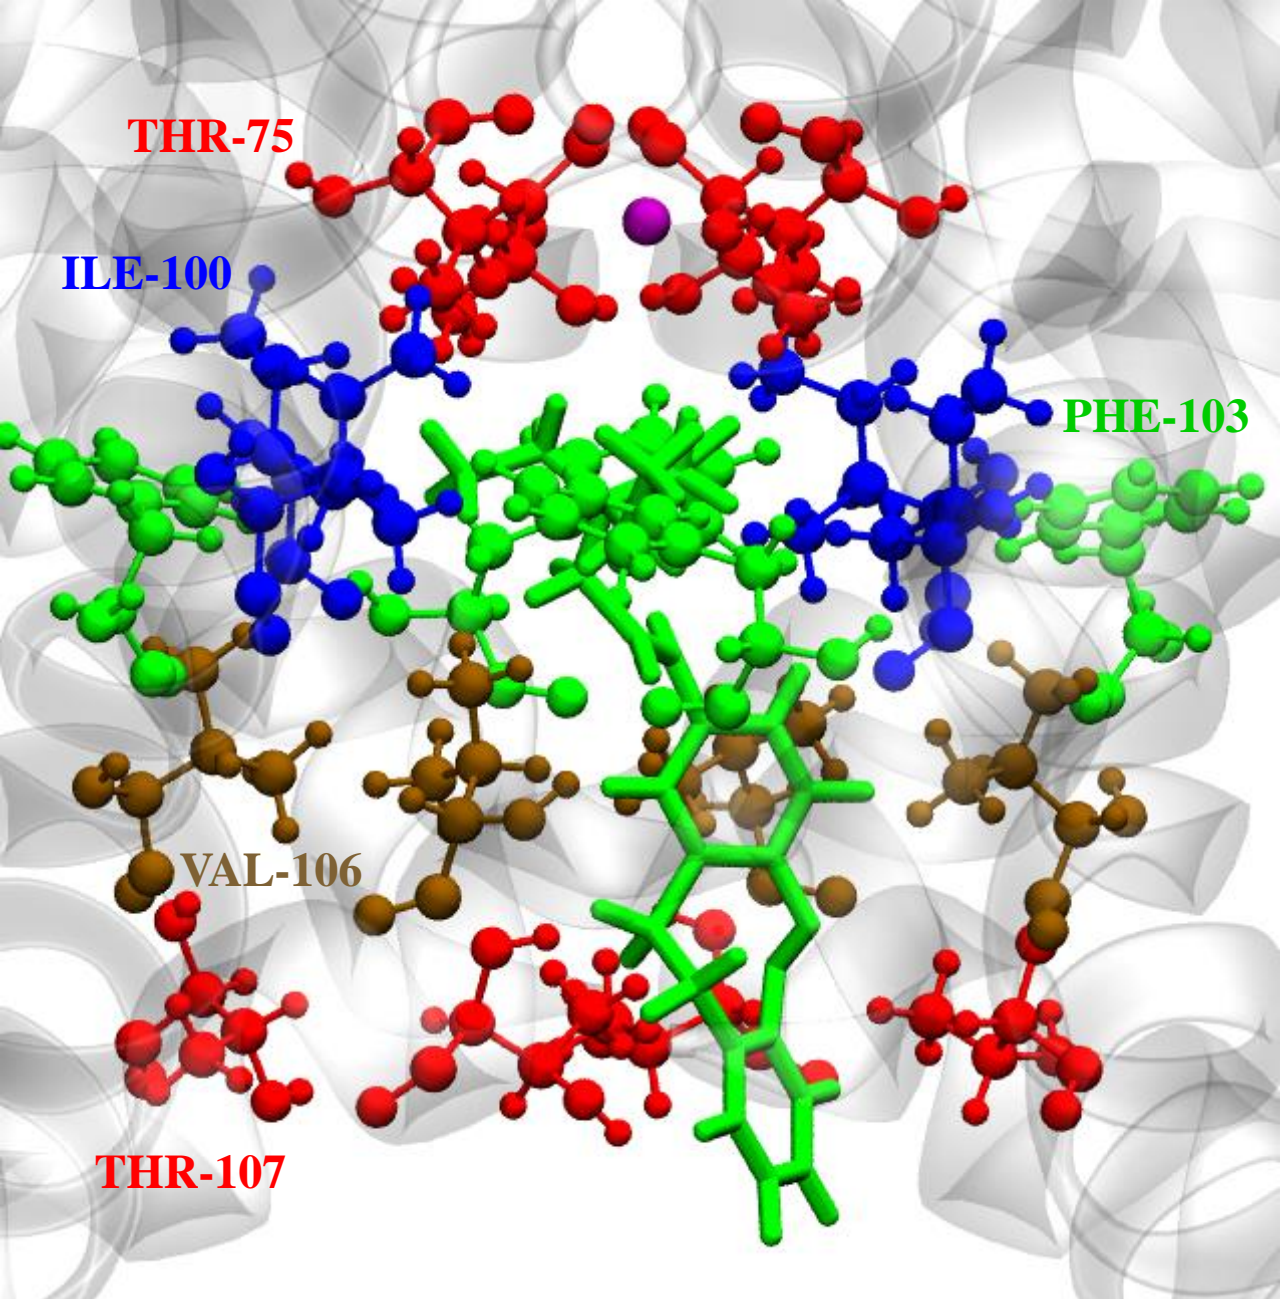

*E1 (C1)*

MM/PBSA Binding energy = -20.4 kcal/mol

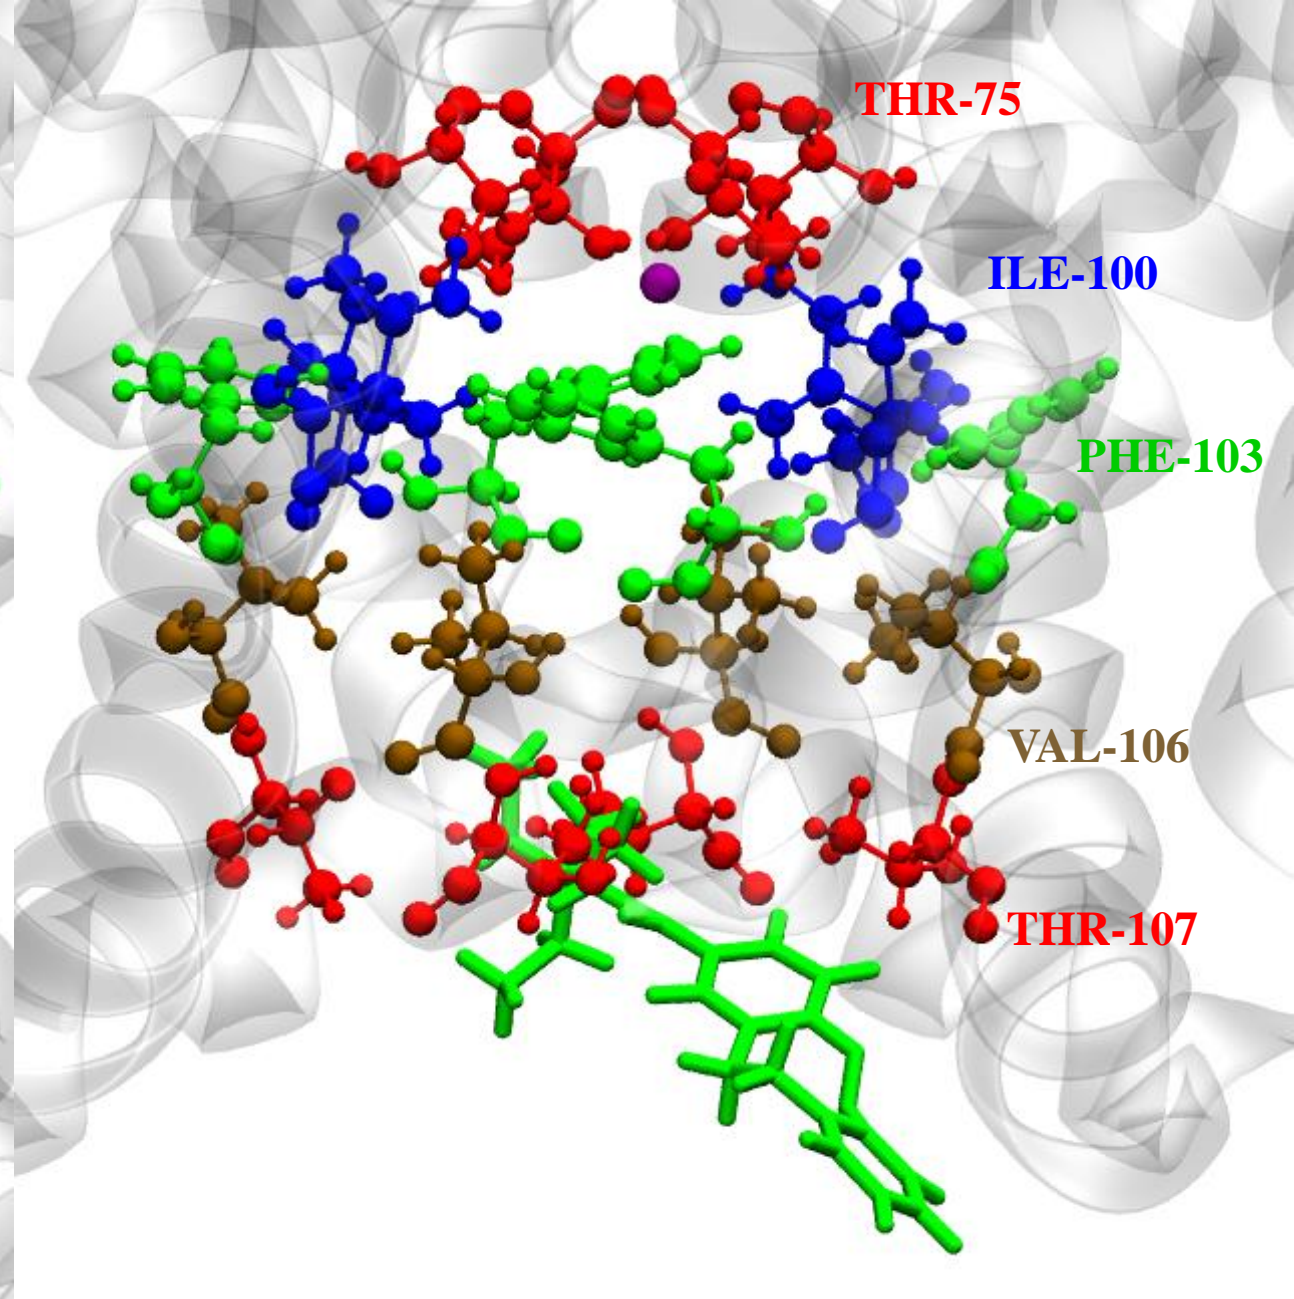

*E1 (C2)*

MM/PBSA Binding energy = -16.2 kcal/mol<sup>15</sup>

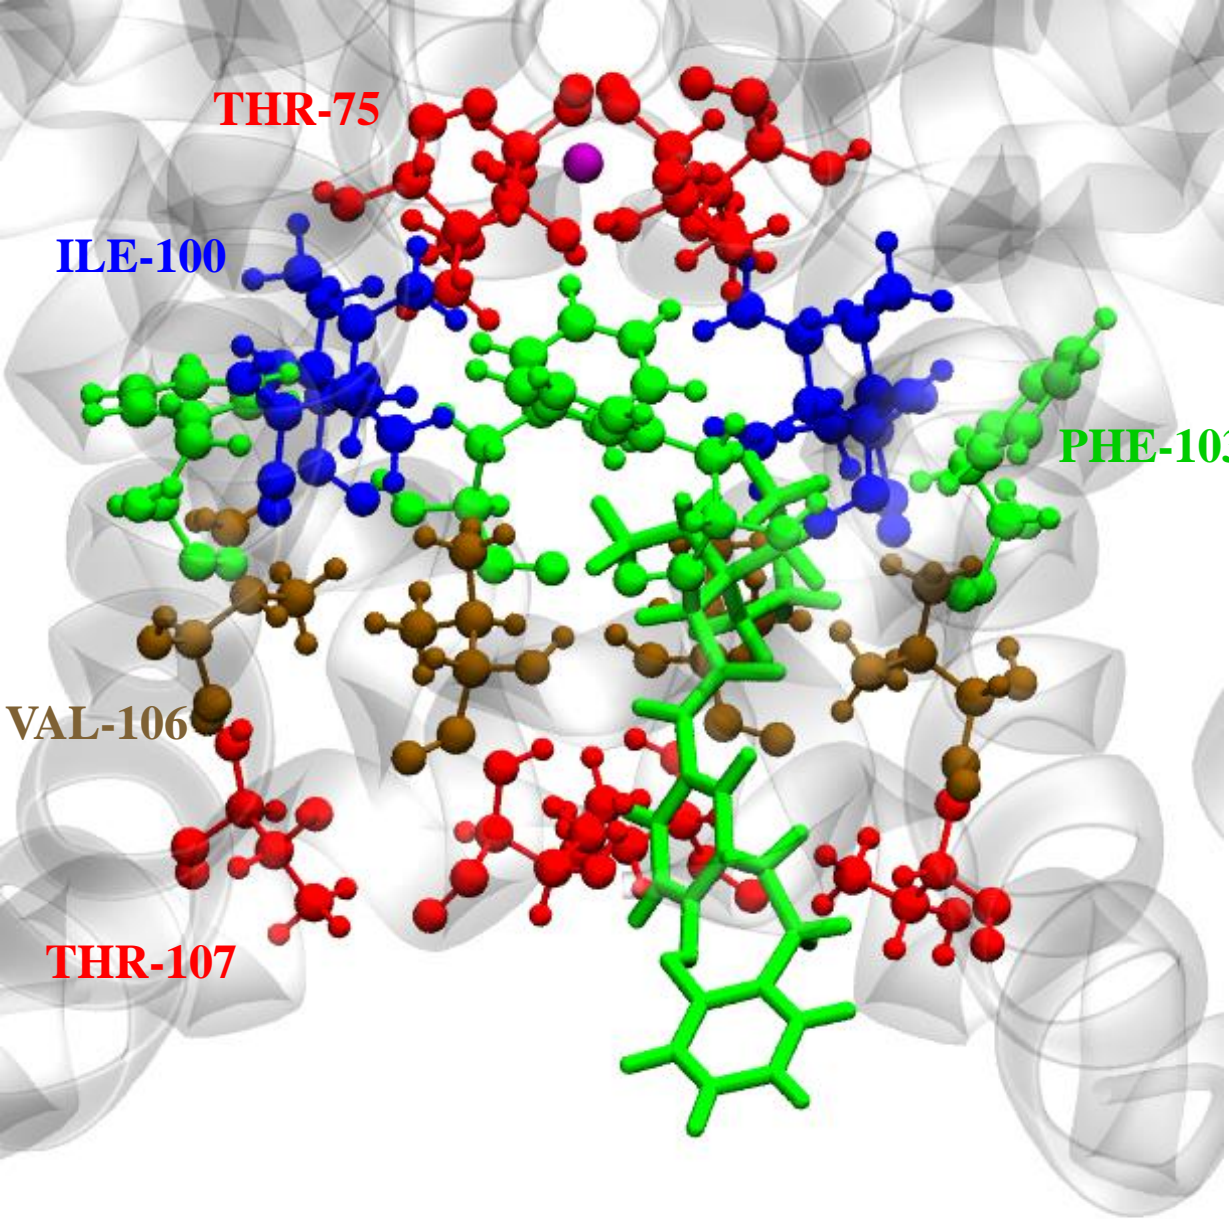

*E1 (C3)*

MM/PBSA Binding energy = -20.9 kcal/mol

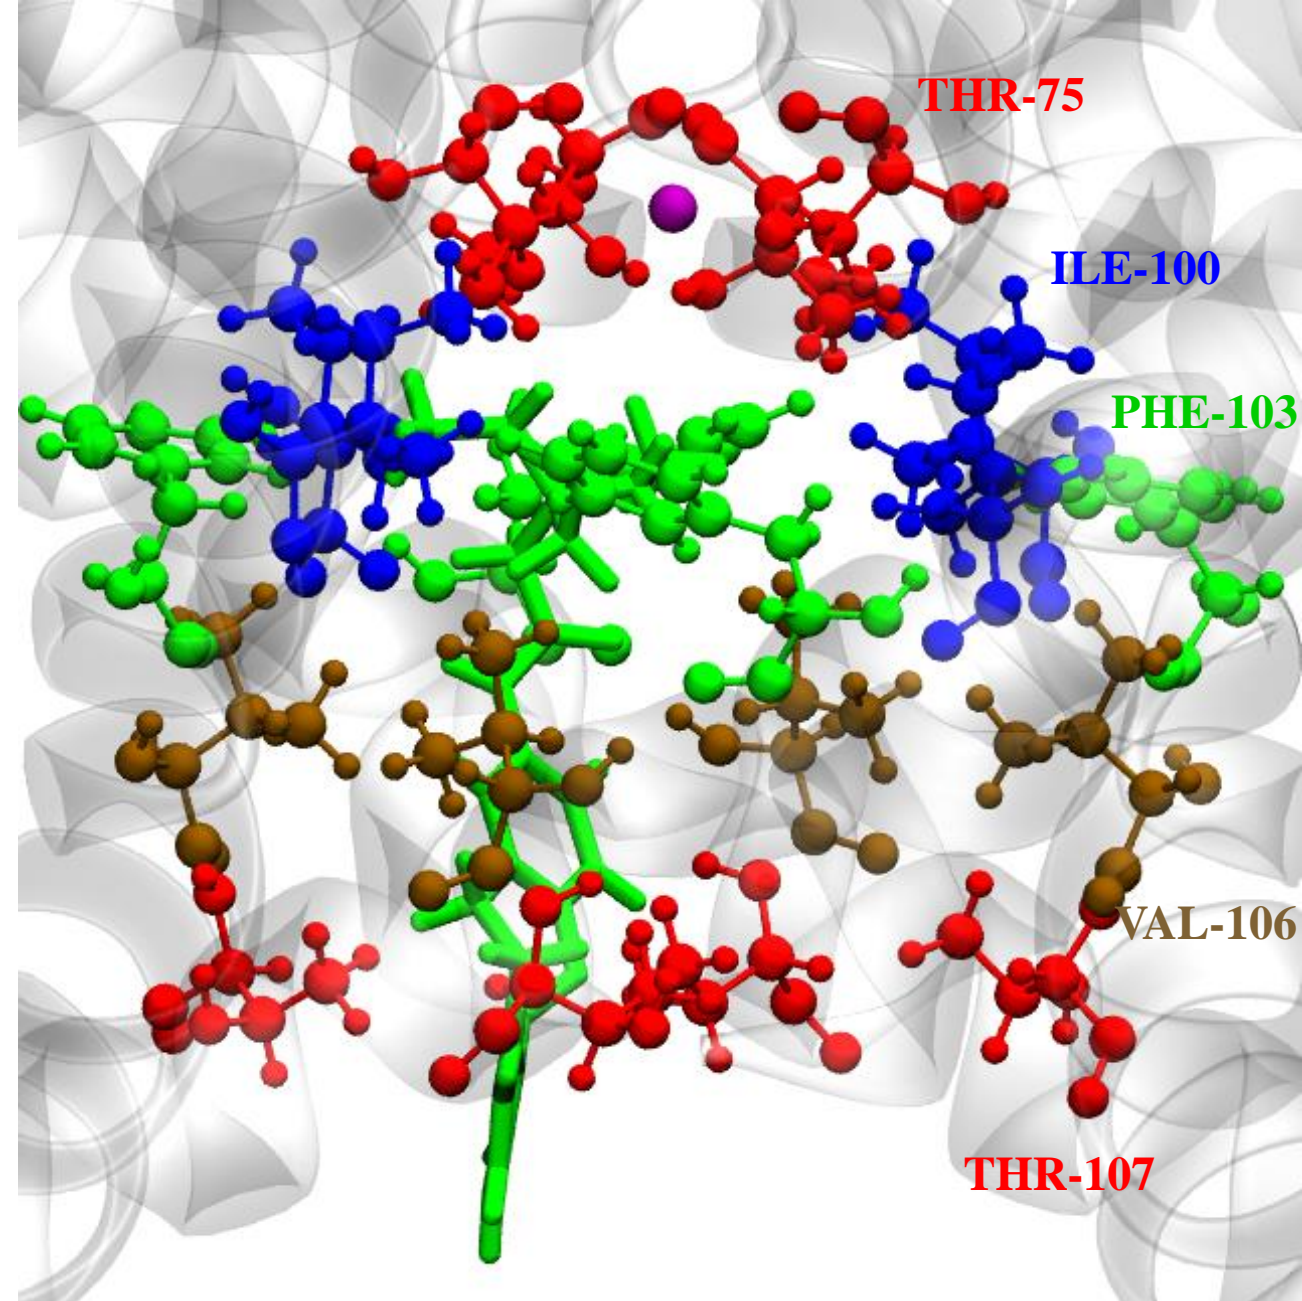

*E1 (C4)*

MM/PBSA Binding energy = -18.1 kcal/mol<sup>16</sup>



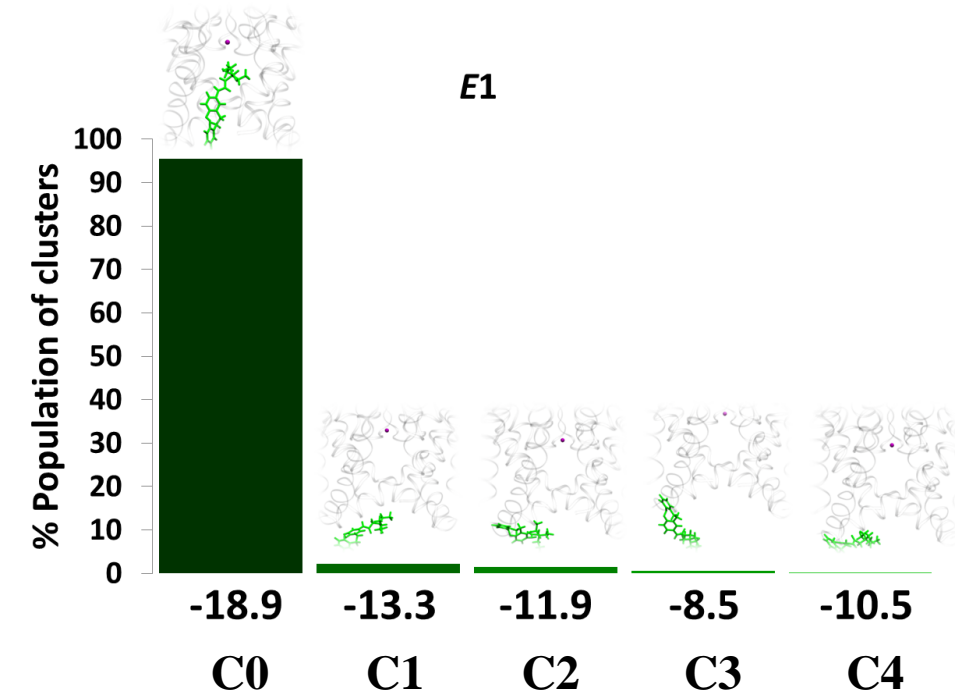

Cn (n = 0 – 1) indicate different clusters. The percentage population of clusters is given on the Y-axis. Corresponding binding energy (B.E.) is given in kcal/mol on the X-axis. Protein is represented in new cartoon model with K<sup>+</sup>-ion (purple ball), and E-LAB-TEA is shown in stick model (green colour).

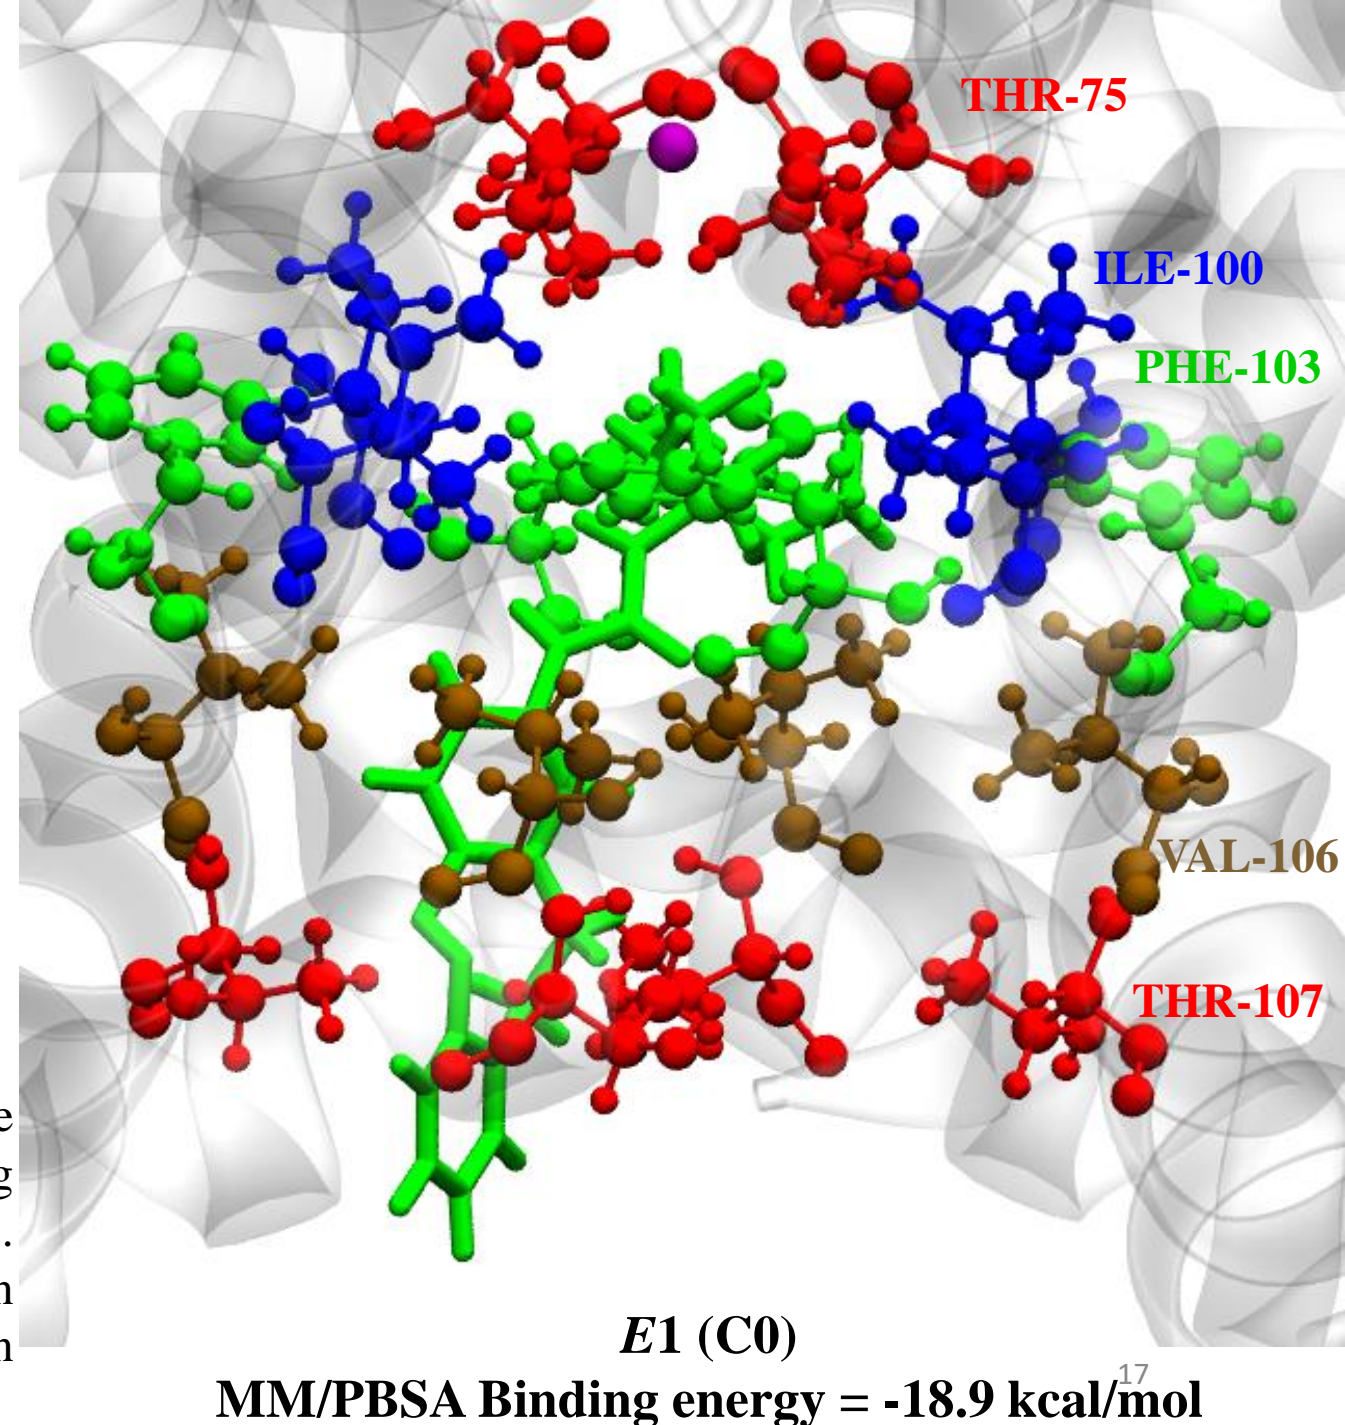

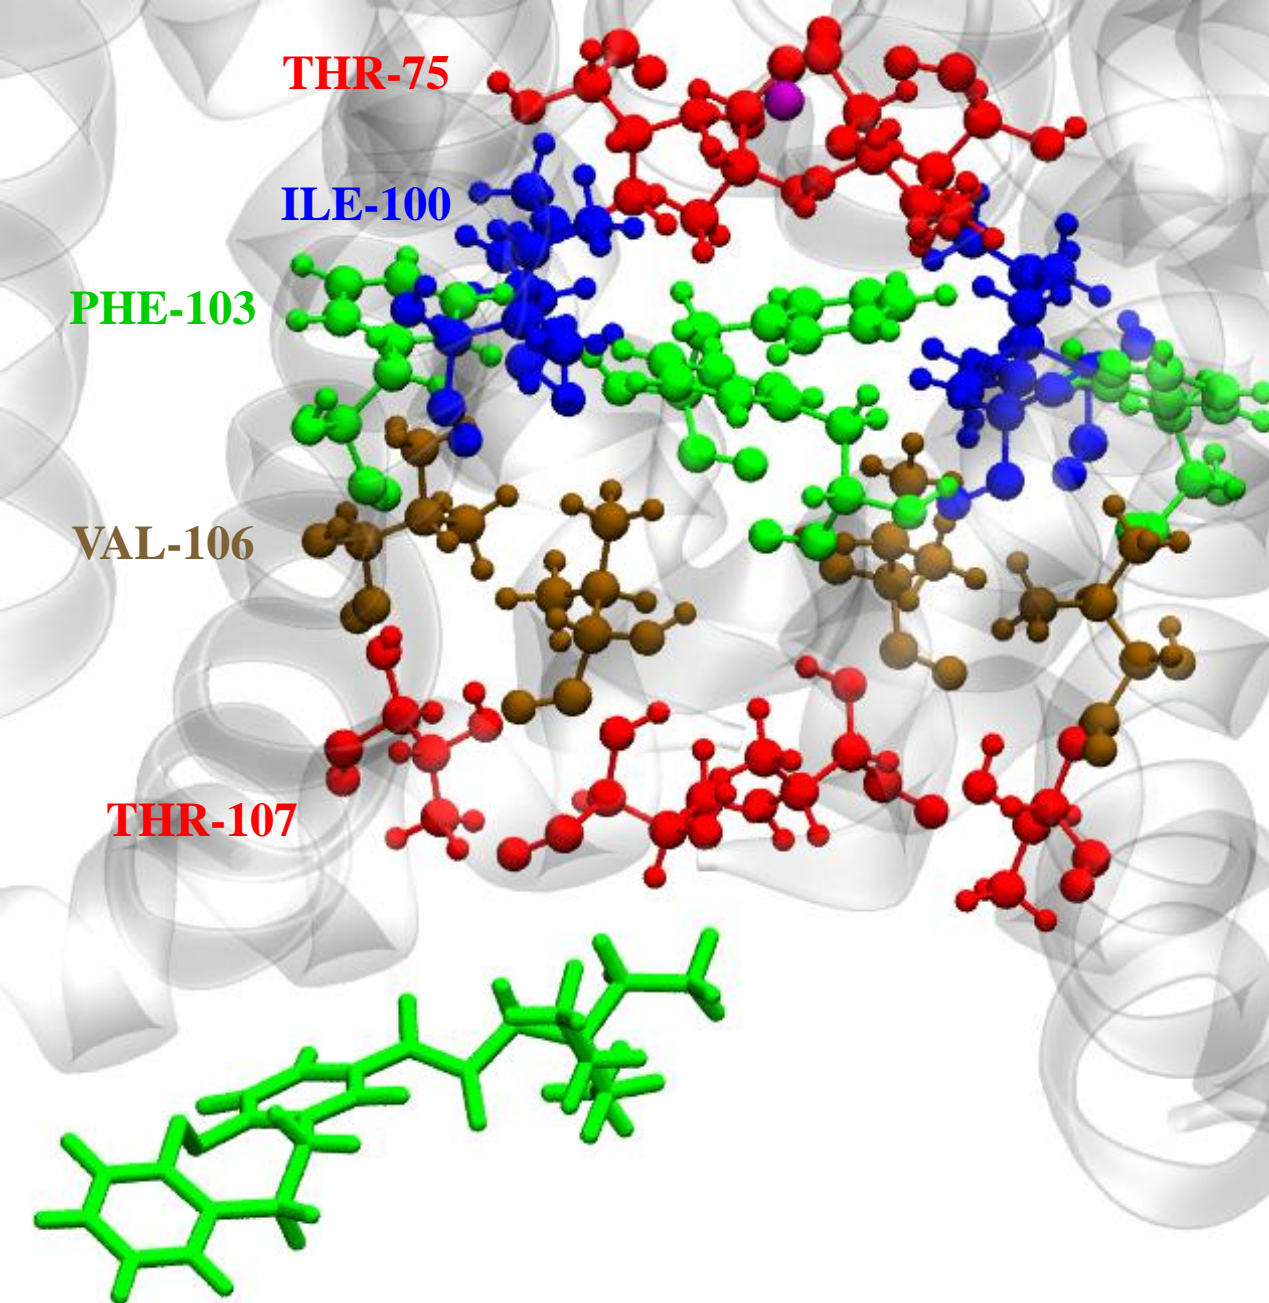

*E1 (C1)*

MM/PBSA Binding energy = -13.3 kcal/mol

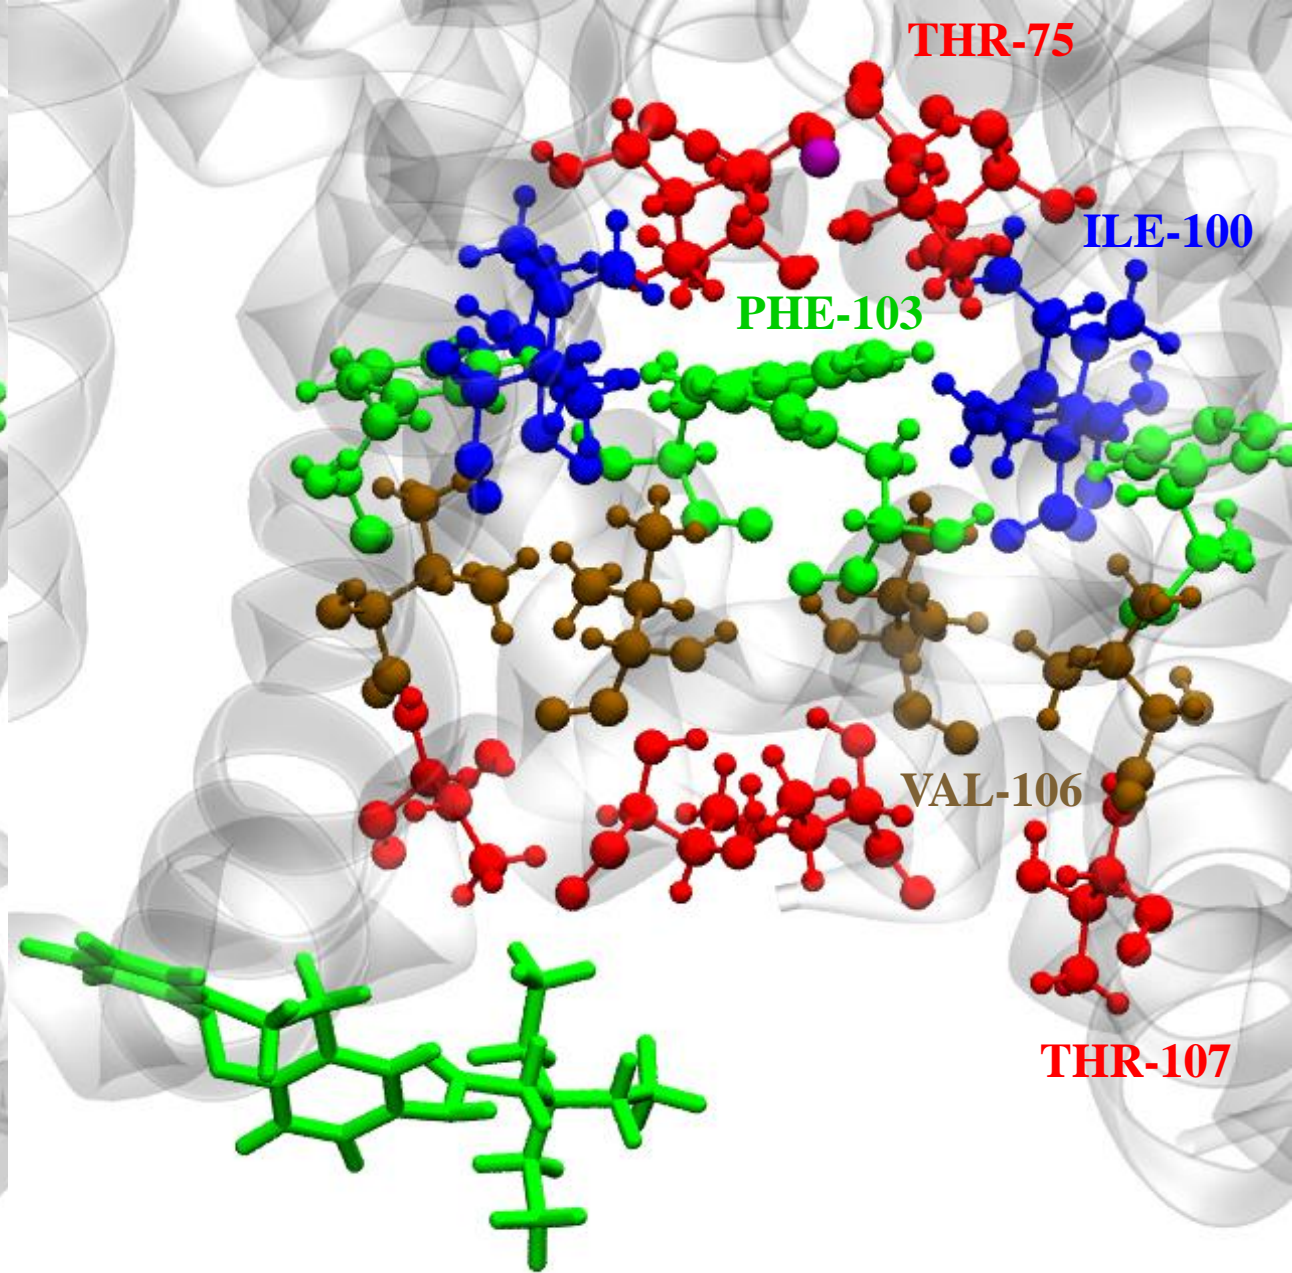

*E1 (C2)*

MM/PBSA Binding energy = -11.9 kcal/mol<sup>18</sup>

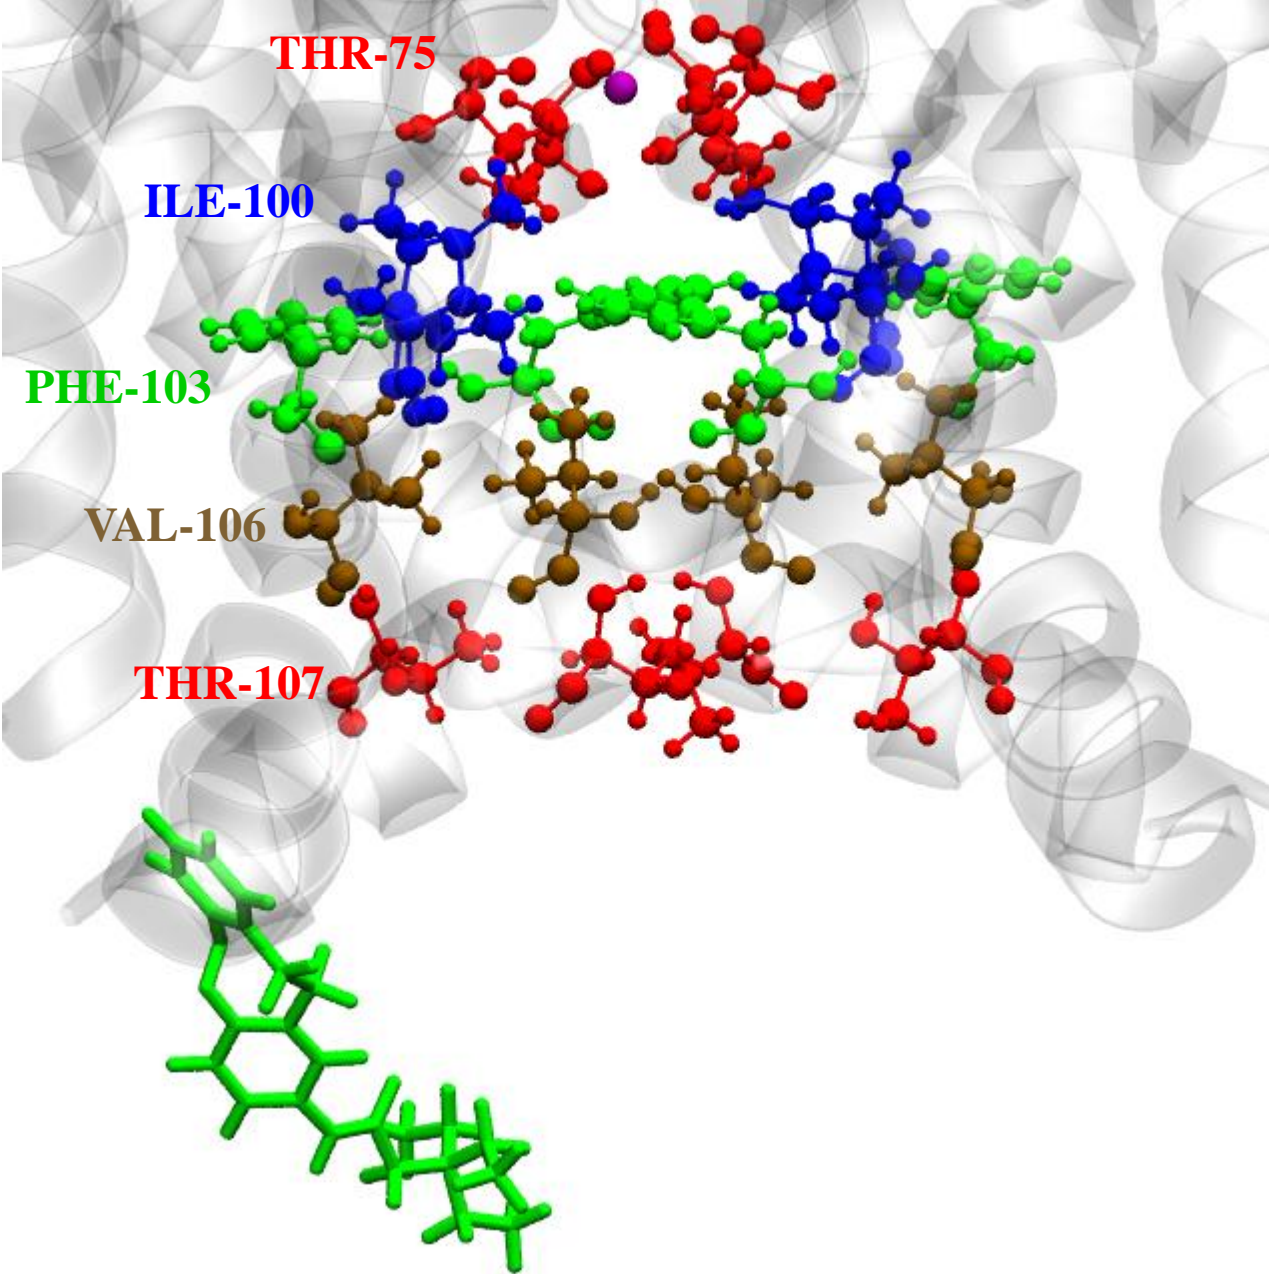

*E1 (C3)*

MM/PBSA Binding energy = -8.5 kcal/mol

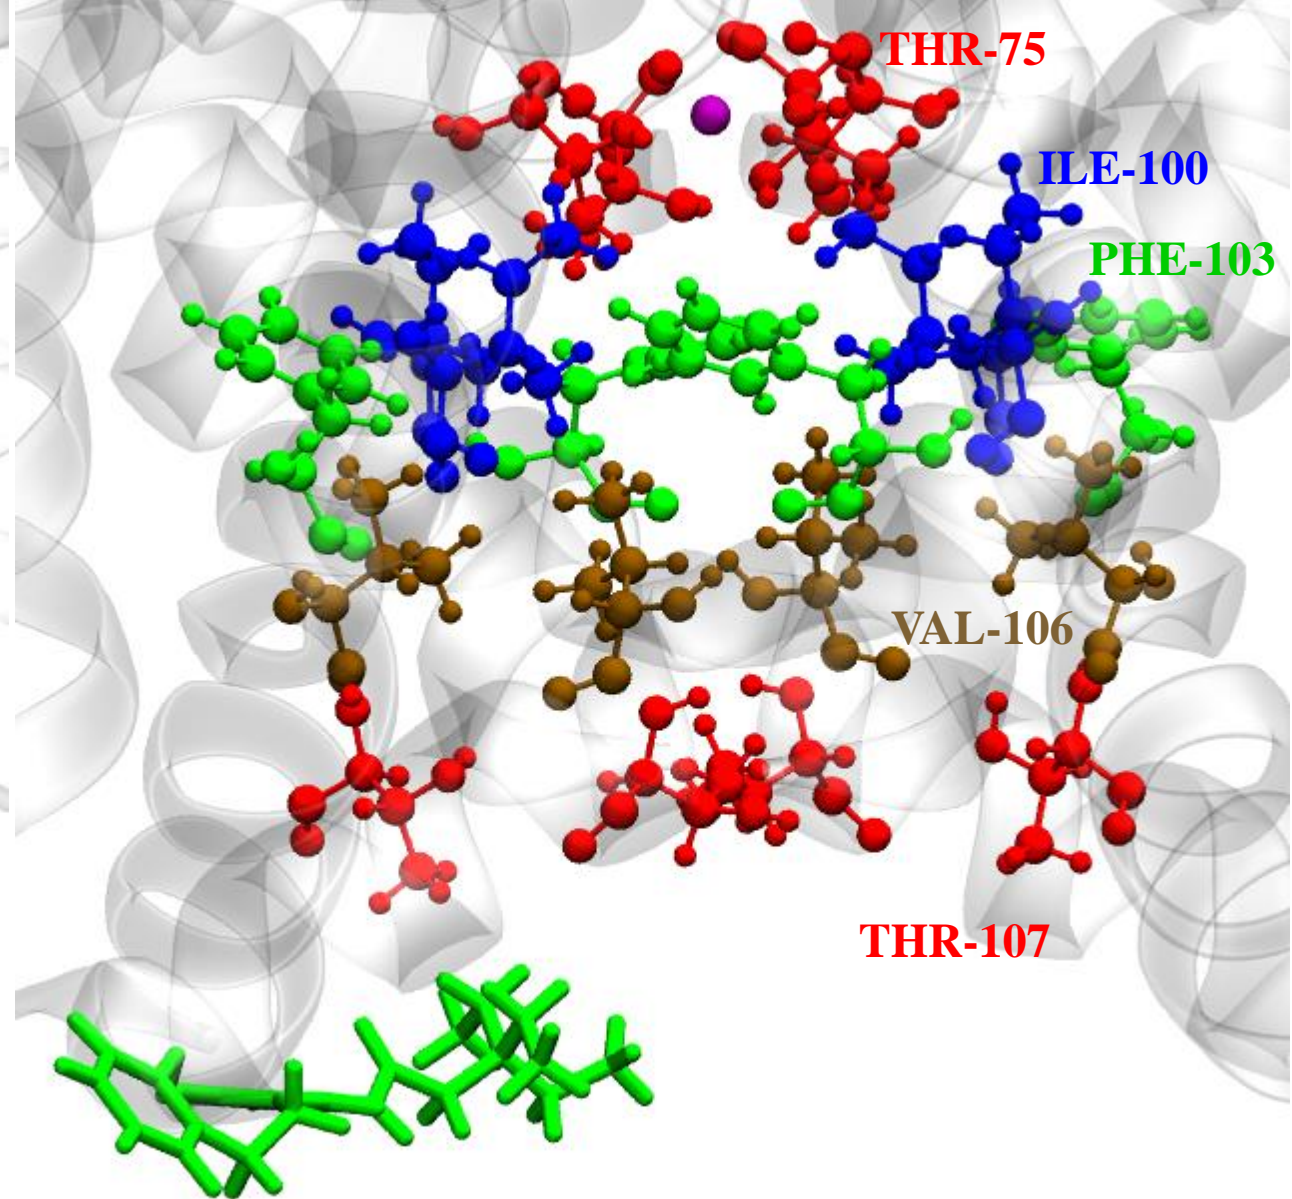

*E1 (C4)*

MM/PBSA Binding energy = -10.5 kcal/mol<sup>19</sup>

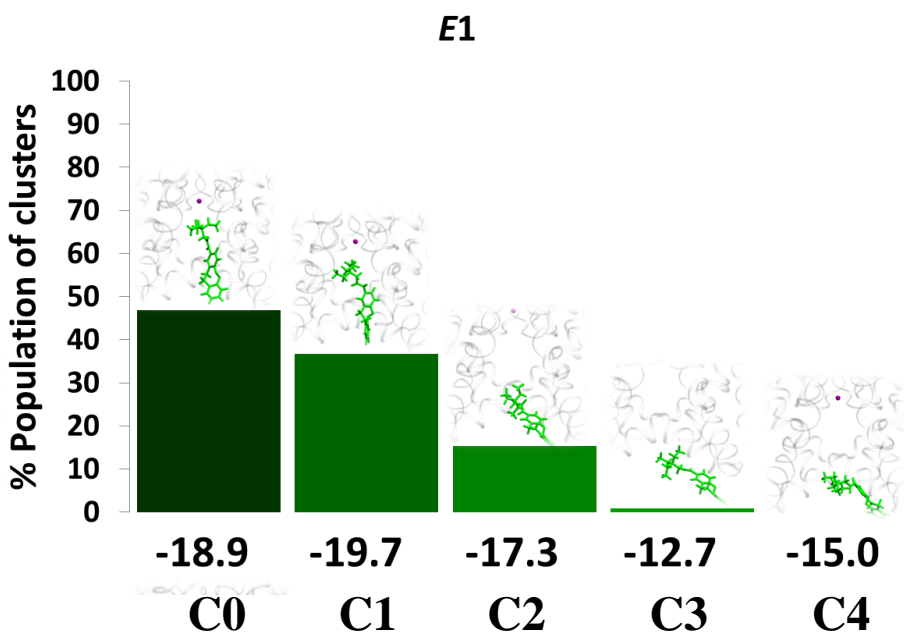

C<sub>n</sub> (n = 0 – 1) indicate different clusters. The percentage population of clusters is given on the Y-axis. Corresponding binding energy (B.E.) is given in kcal/mol on the X-axis. Protein is represented in new cartoon model with K<sup>+</sup>-ion (purple ball), and *E*-LAB-TEA is shown in stick model (green colour).

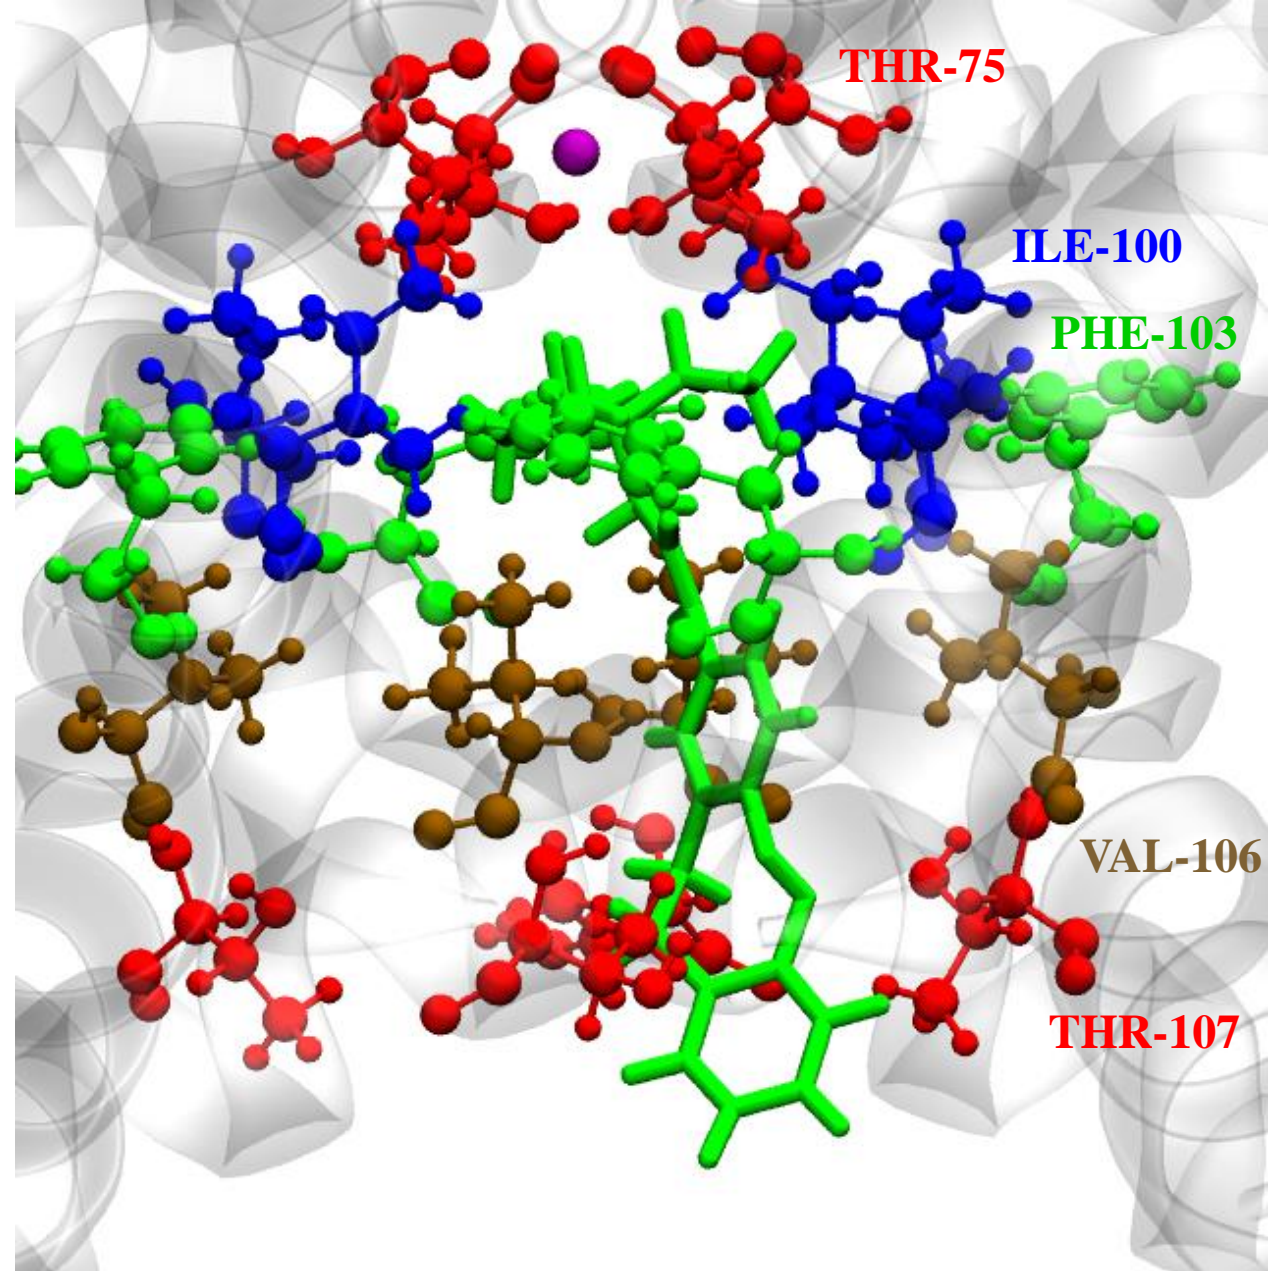

**E1 (C0)**  
**MM/PBSA Binding energy = -18.9 kcal/mol**<sup>20</sup>

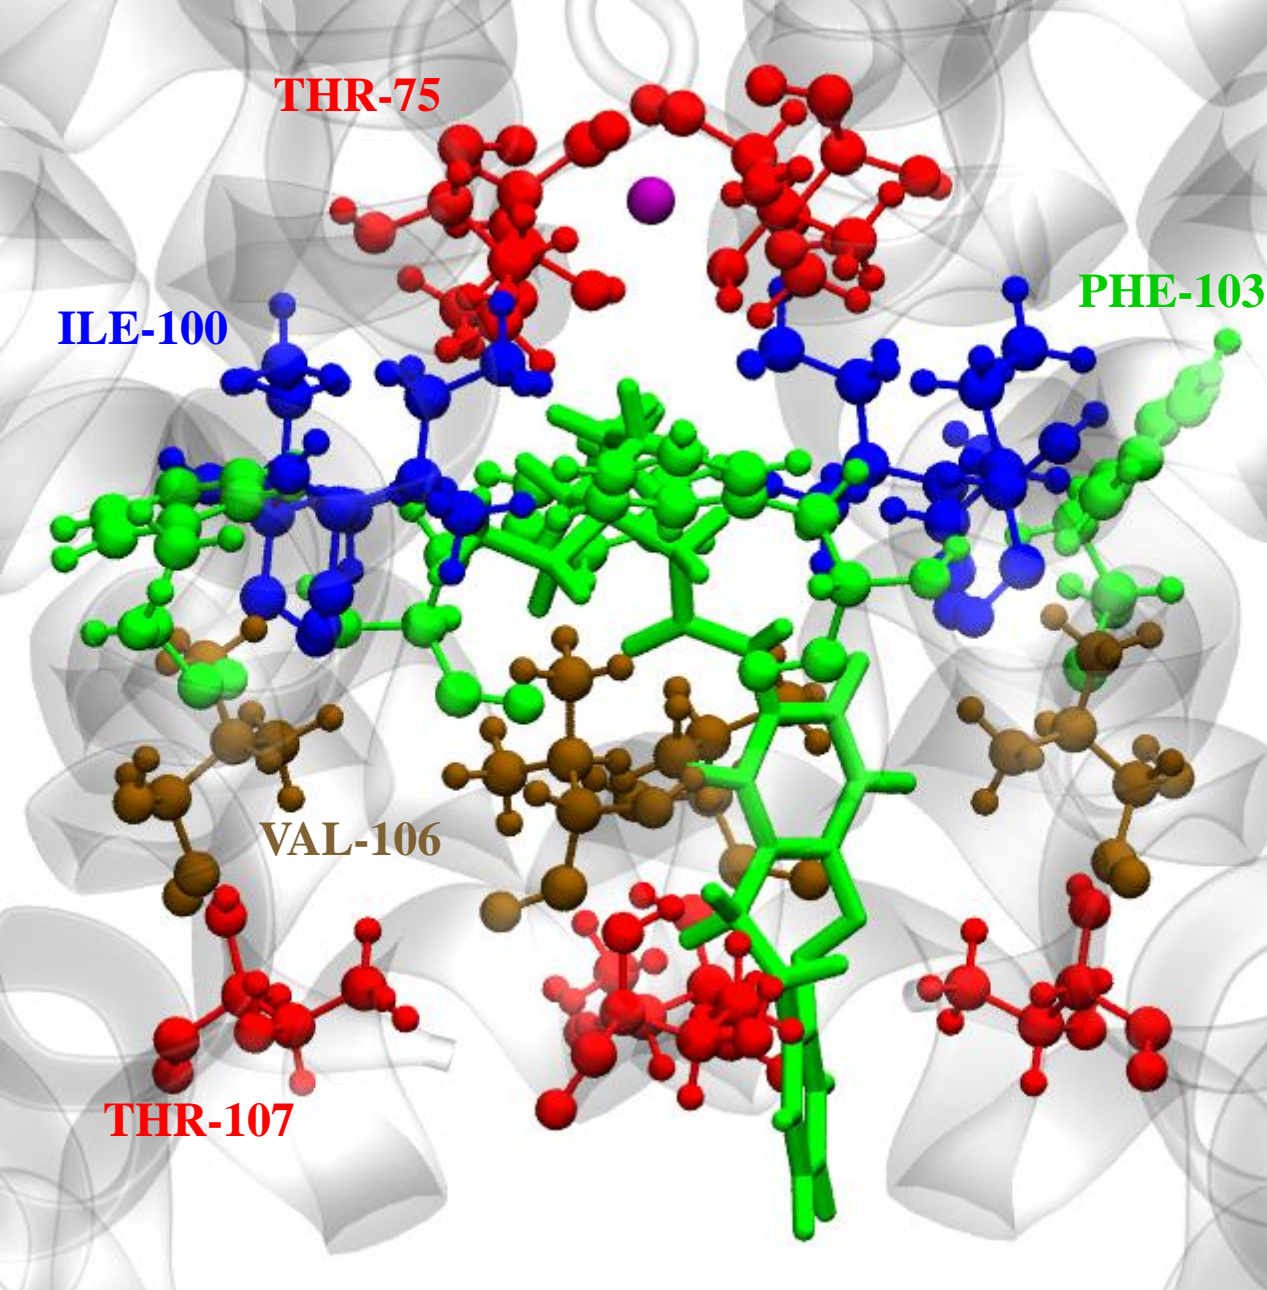

*E1 (C1)*

MM/PBSA Binding energy = -19.7 kcal/mol

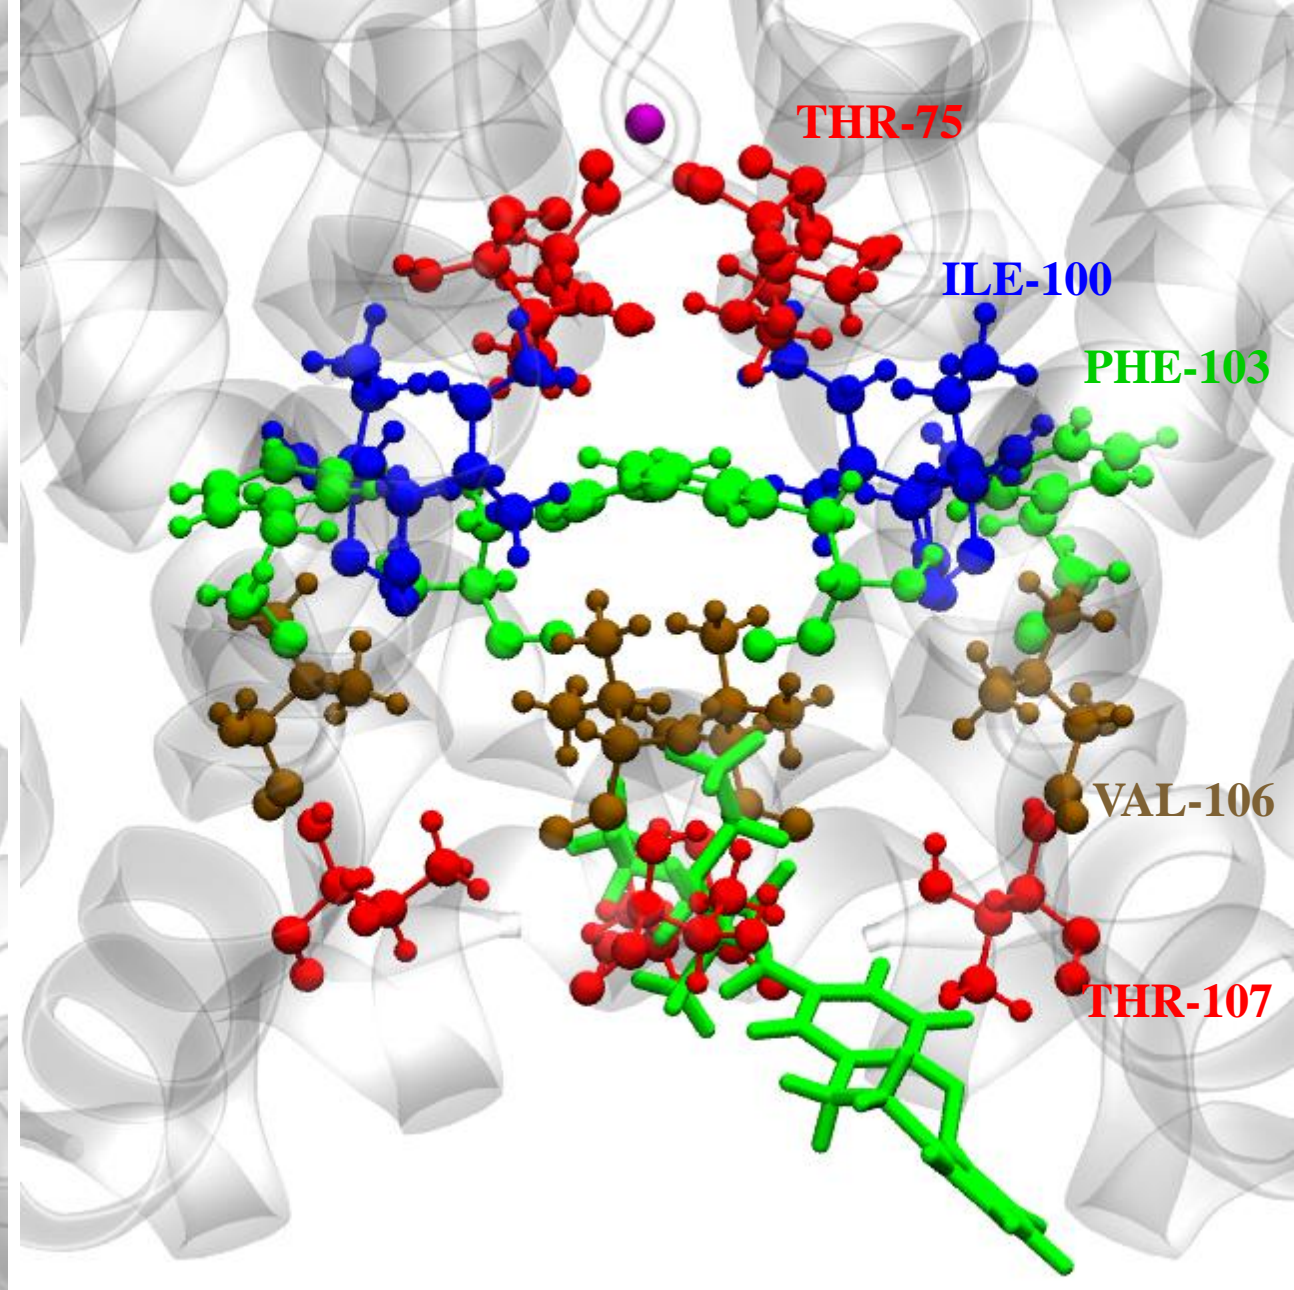

*E1 (C2)*

MM/PBSA Binding energy = -17.3 kcal/mol<sup>21</sup>

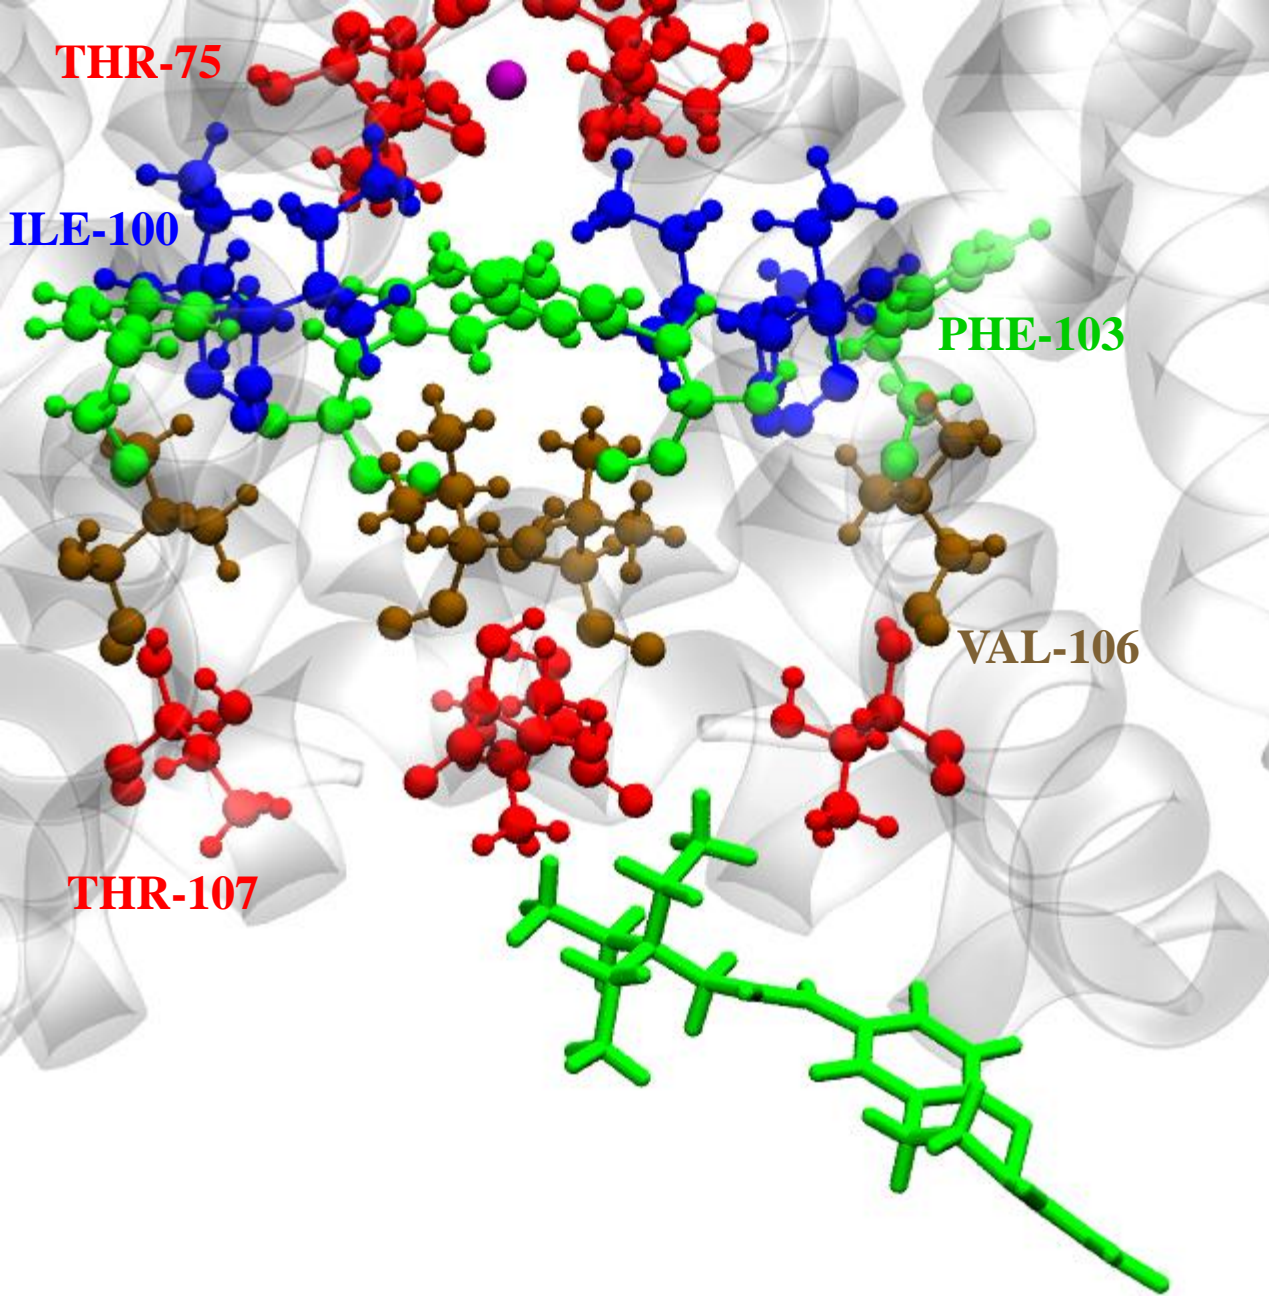

***E1 (C3)***

**MM/PBSA Binding energy = -12.7 kcal/mol**

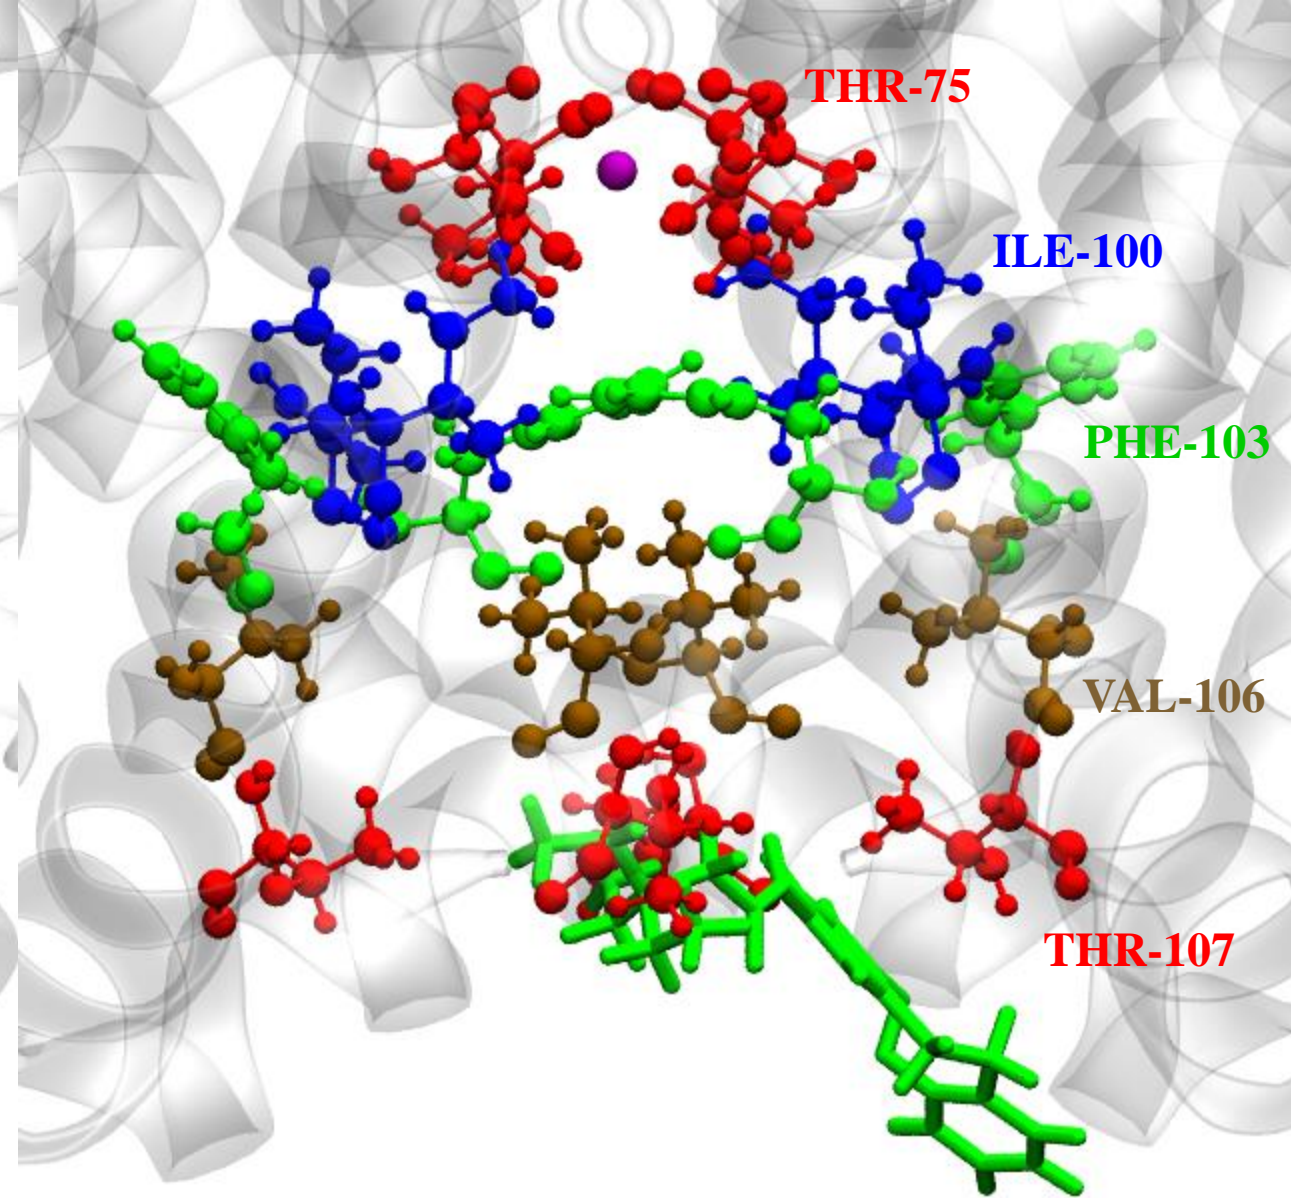

***E1 (C4)***

**MM/PBSA Binding energy = -15.0 kcal/mol<sup>22</sup>**

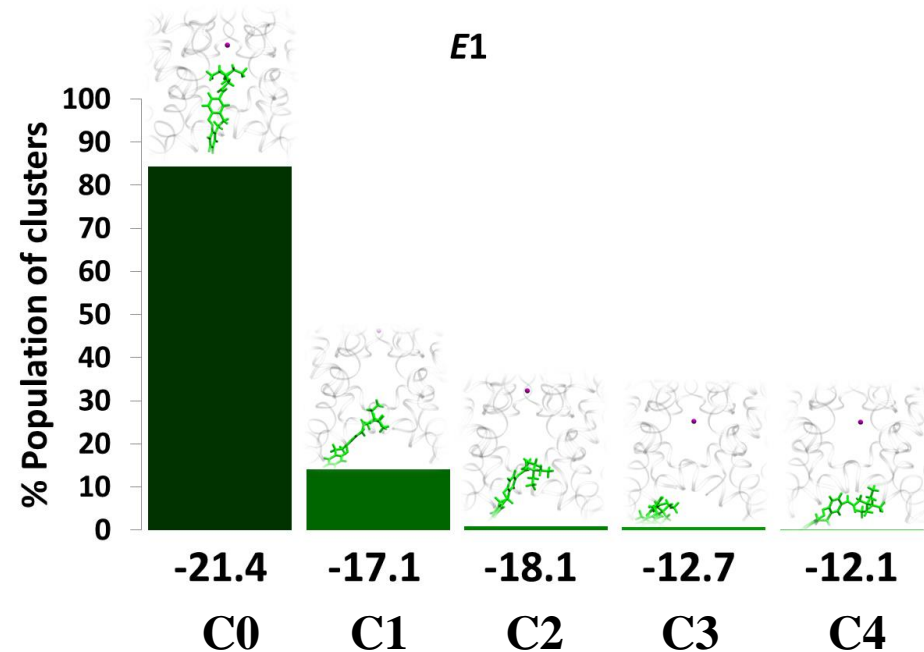

C<sub>n</sub> (n = 0 – 1) indicate different clusters. The percentage population of clusters is given on the Y-axis. Corresponding binding energy (B.E.) is given in kcal/mol on the X-axis. Protein is represented in new cartoon model with K<sup>+</sup>-ion (purple ball), and *E*-LAB-TEA is shown in stick model (green colour).

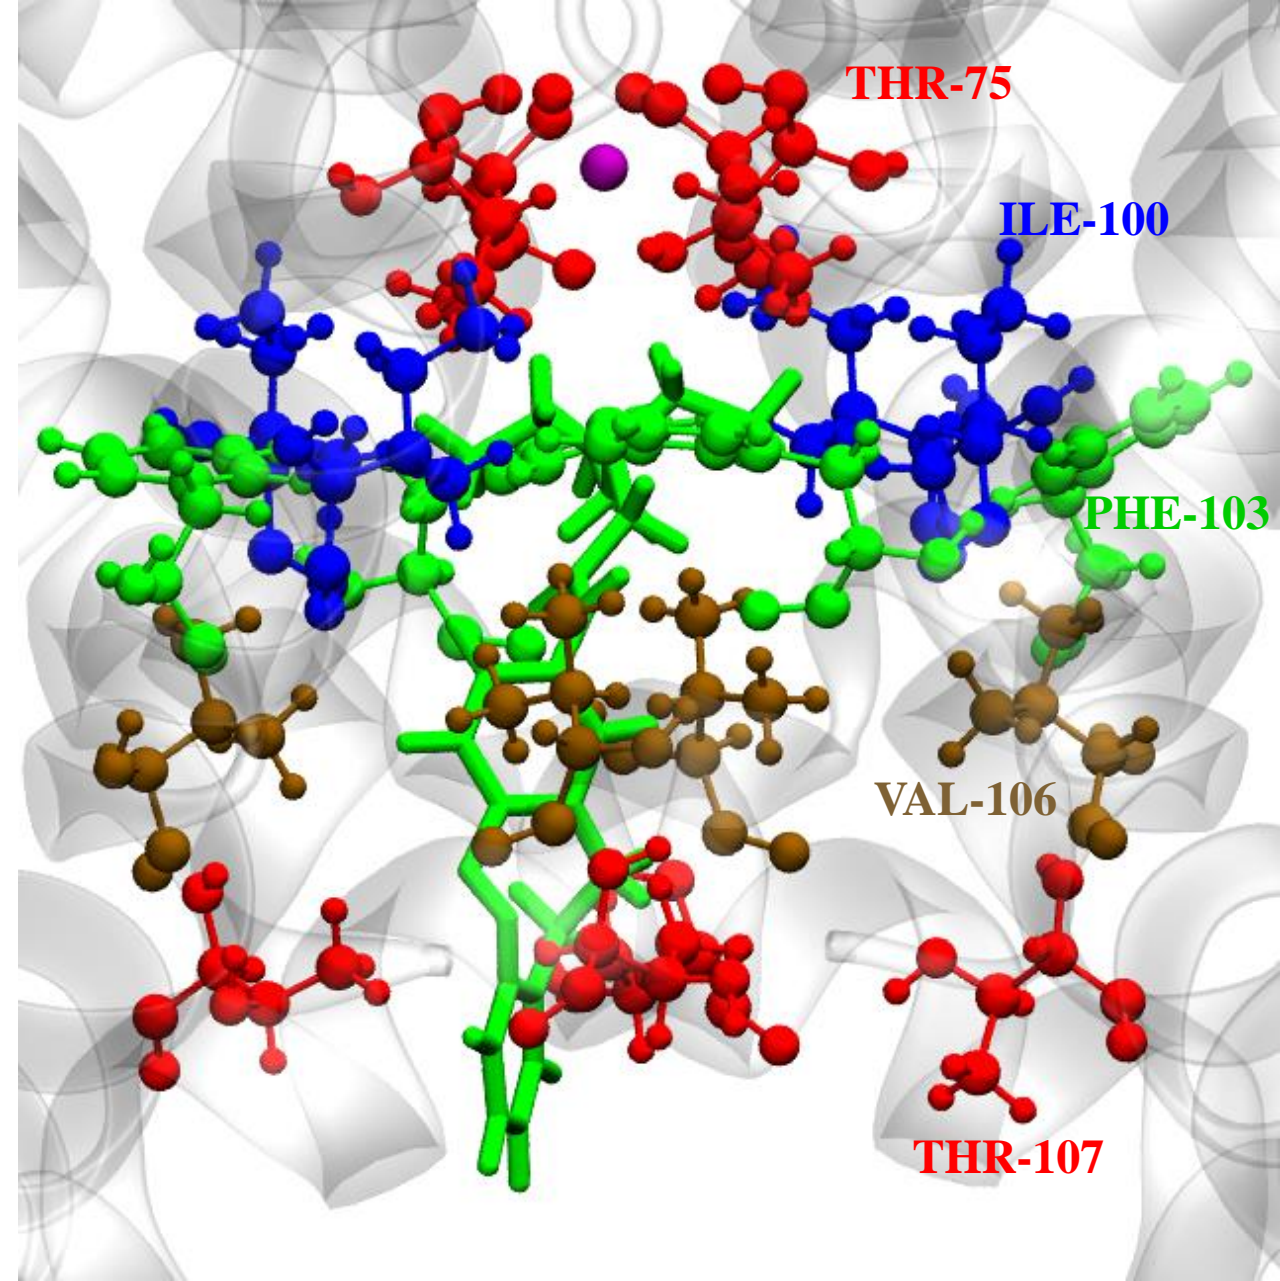

***E*1 (C0)**  
**MM/PBSA Binding energy = -21.4 kcal/mol<sup>23</sup>**

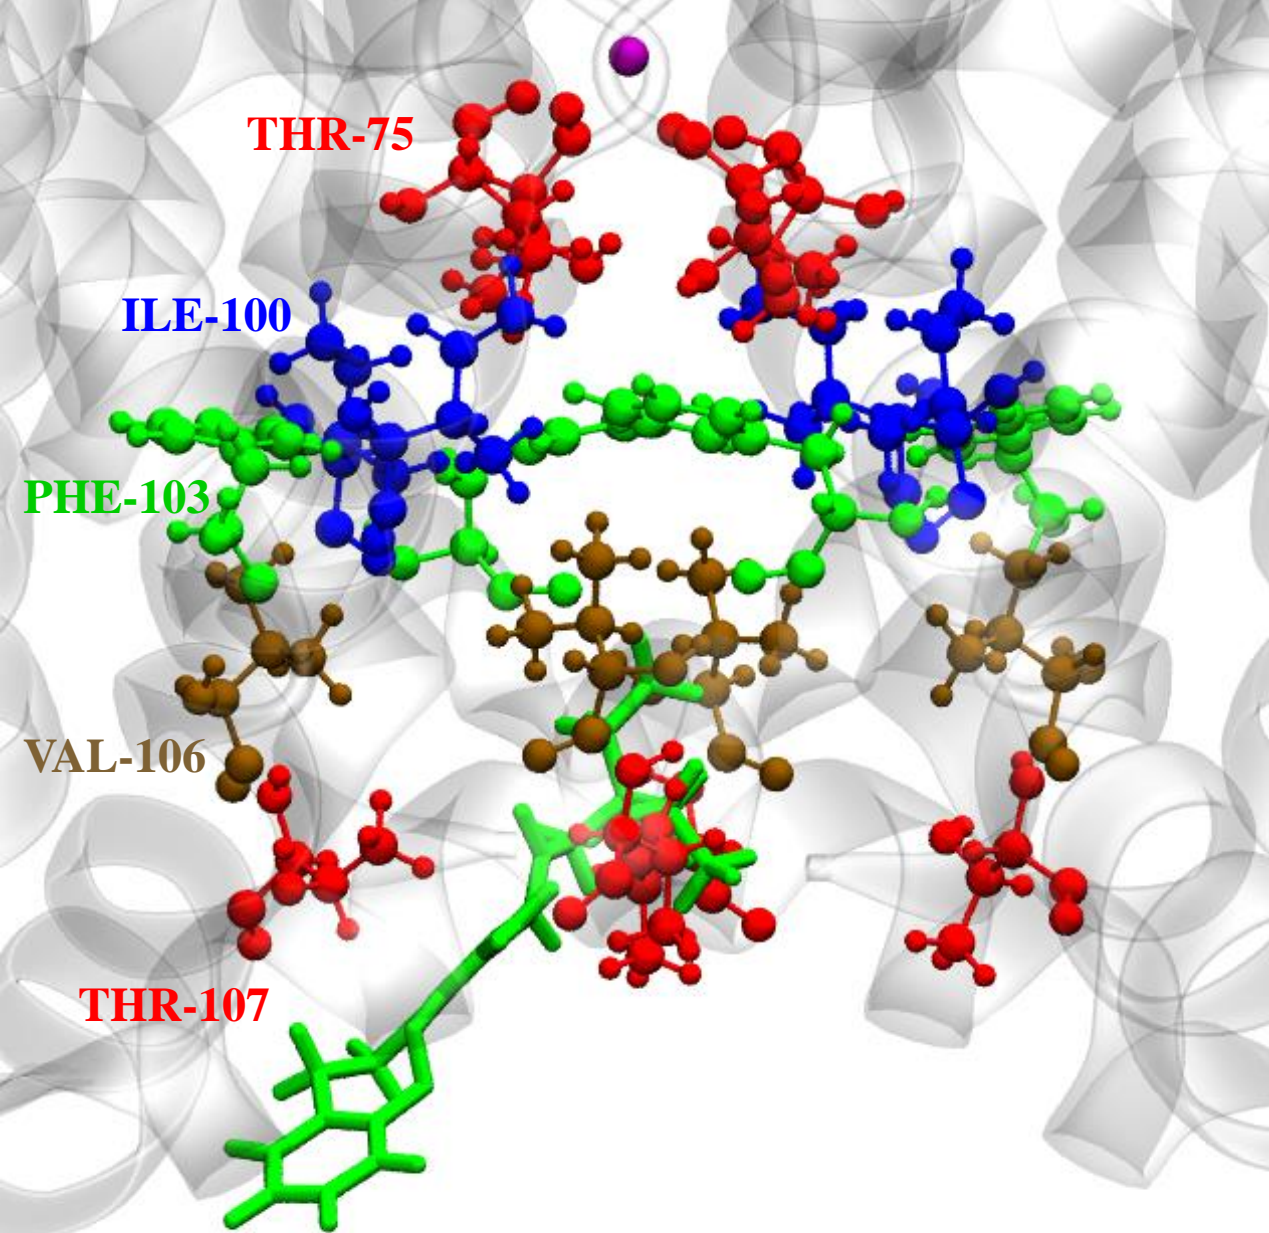

*E1 (C1)*

MM/PBSA Binding energy = -17.1 kcal/mol

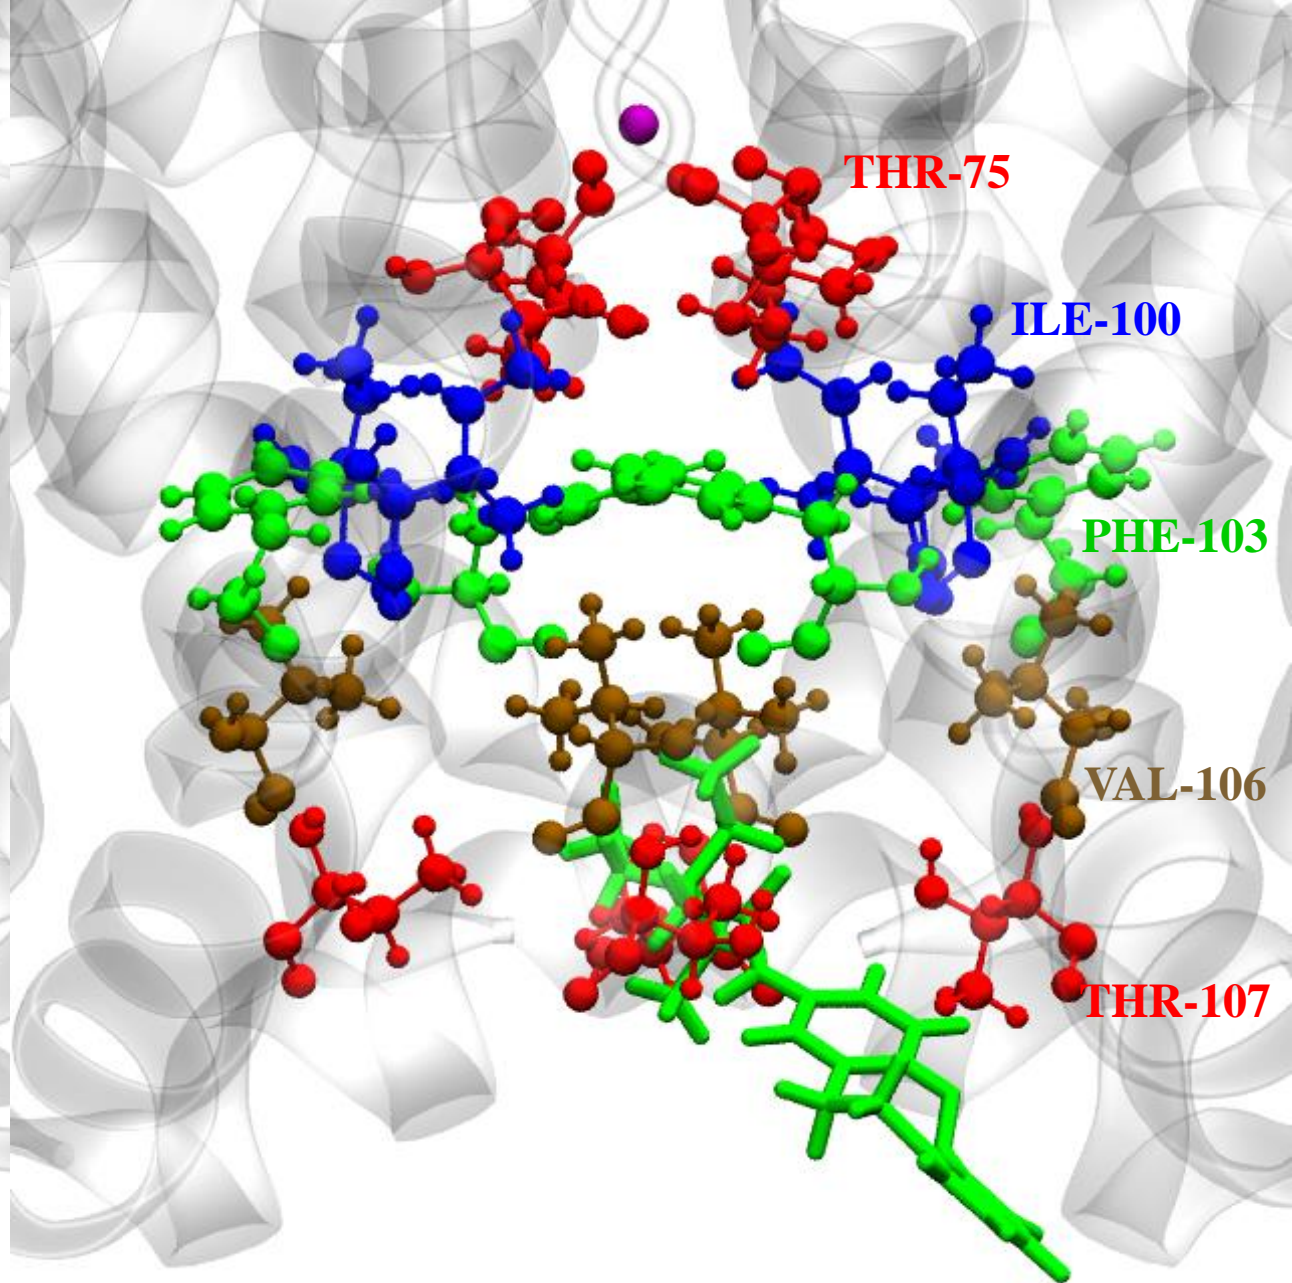

*E1 (C2)*

MM/PBSA Binding energy = -18.1 kcal/mol<sup>24</sup>



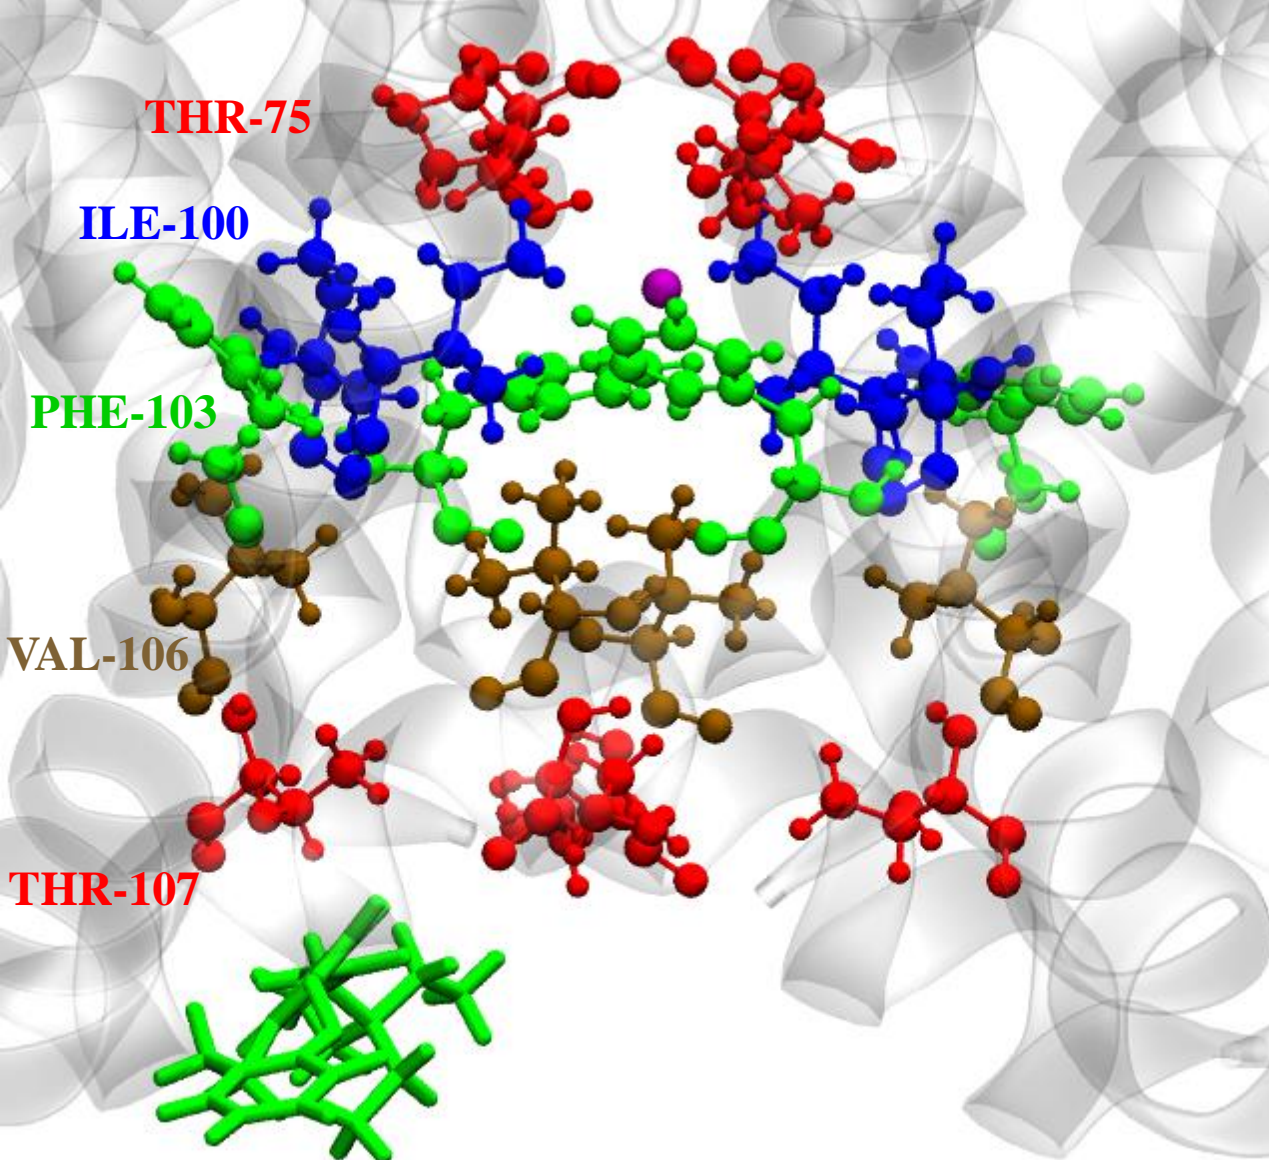

*E1 (C3)*

MM/PBSA Binding energy = -12.7 kcal/mol

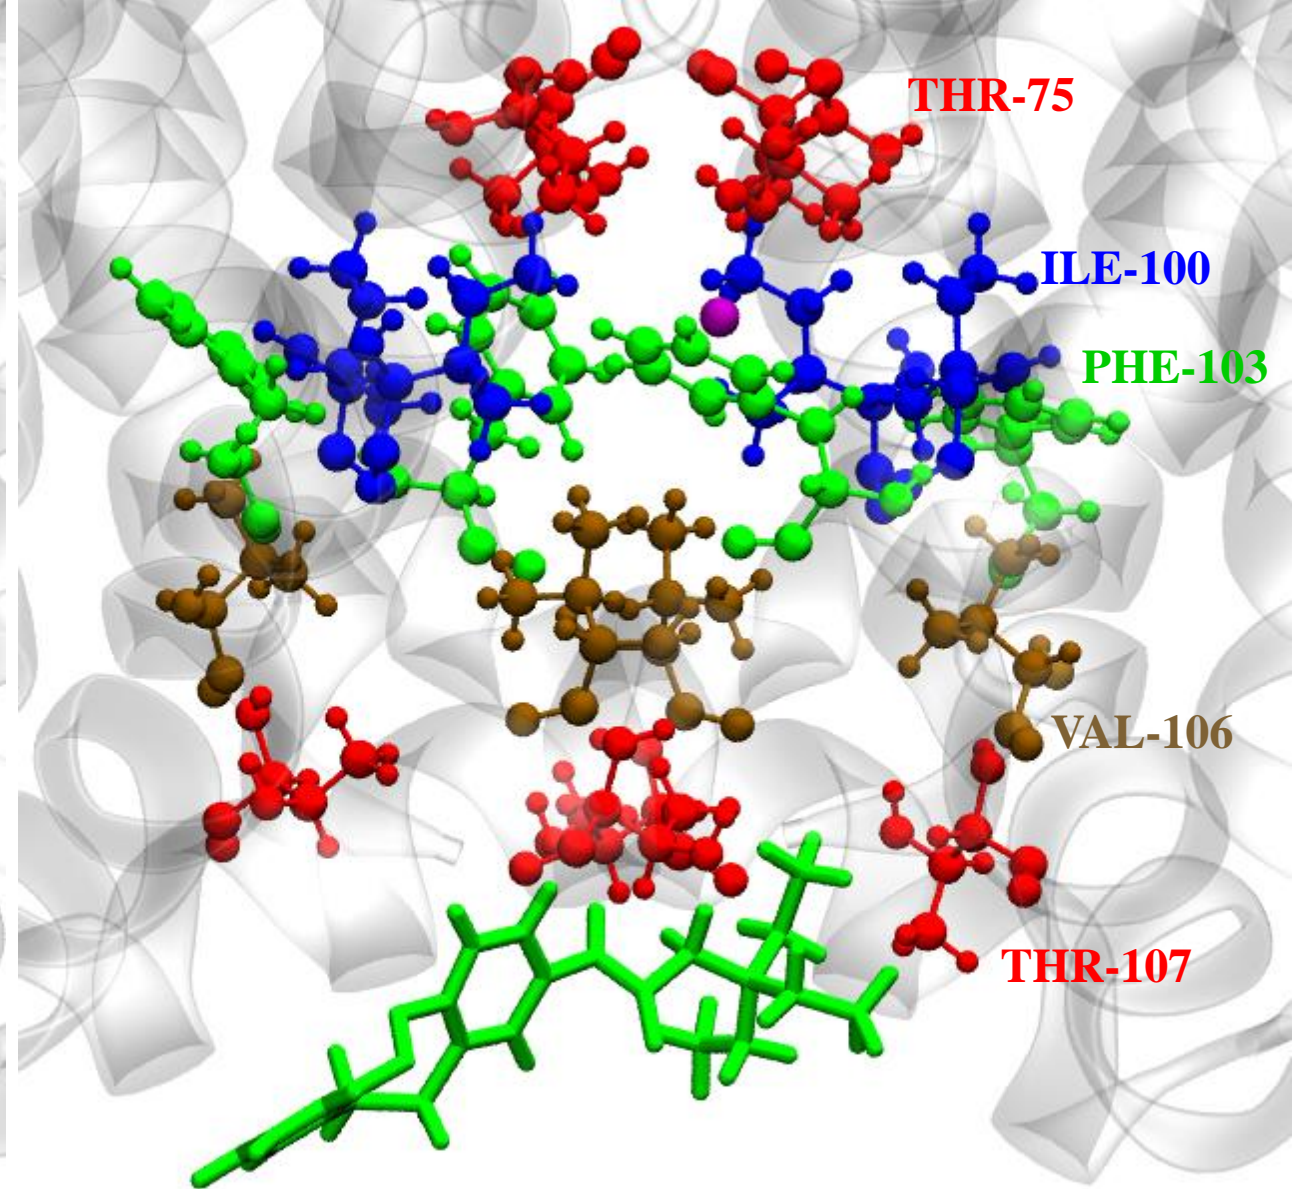

*E1 (C4)*

MM/PBSA Binding energy = -12.1 kcal/mol<sup>25</sup>

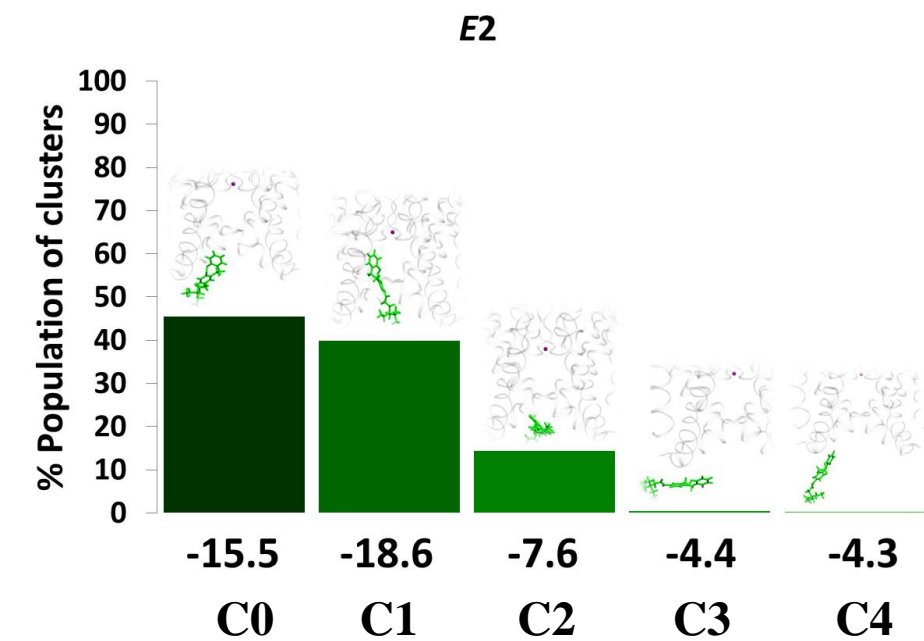

C<sub>n</sub> (n = 0 – 1) indicate different clusters. The percentage population of clusters is given on the Y-axis. Corresponding binding energy (B.E.) is given in kcal/mol on the X-axis. Protein is represented in new cartoon model with K<sup>+</sup>-ion (purple ball), and *E*-LAB-TEA is shown in stick model (green colour).

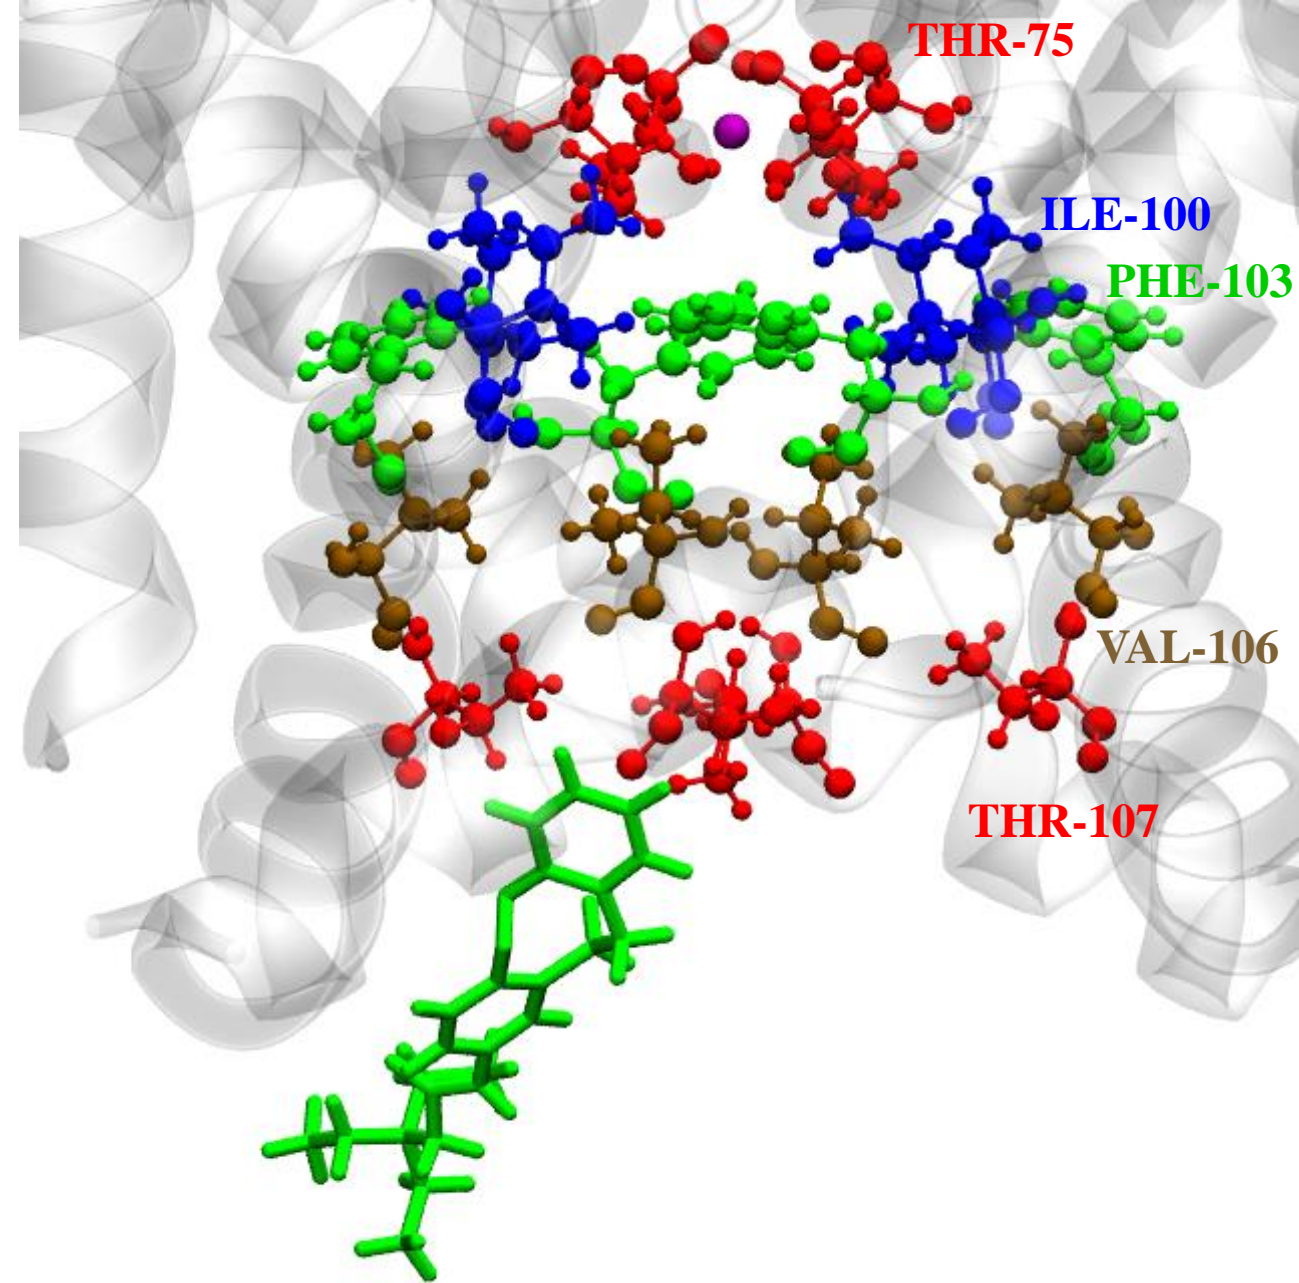

***E2* (C0)**  
**MM/PBSA Binding energy = -15.5 kcal/mol**<sup>26</sup>

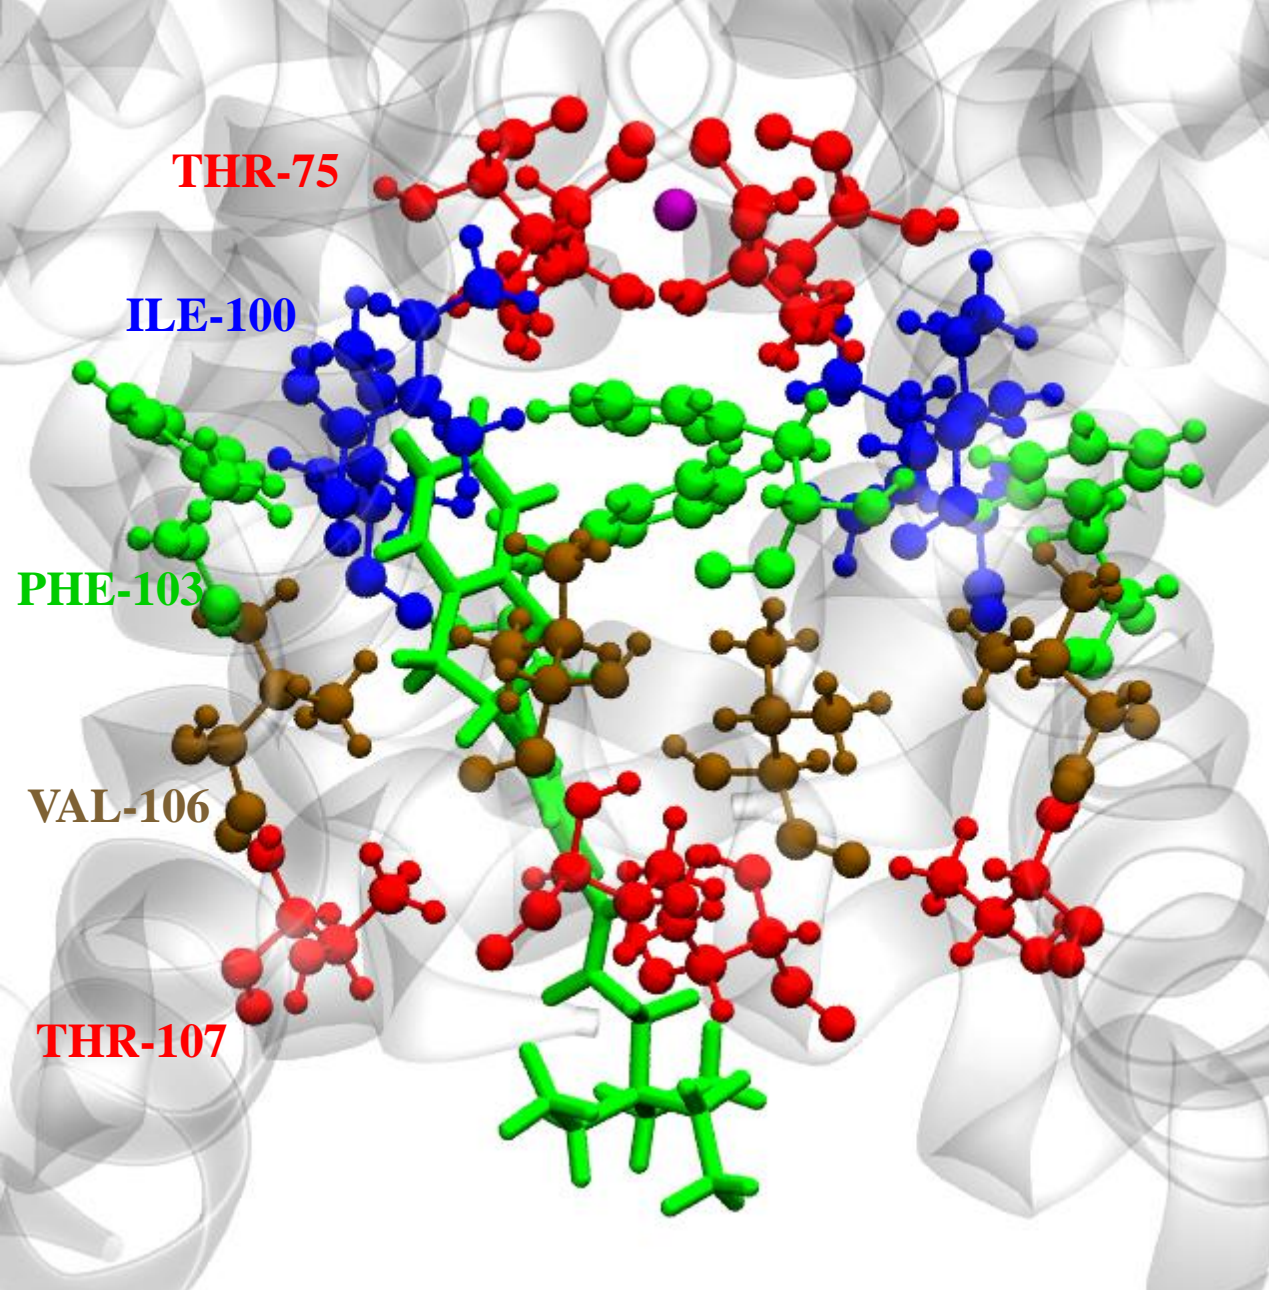

*E2 (C1)*

MM/PBSA Binding energy = -18.6 kcal/mol

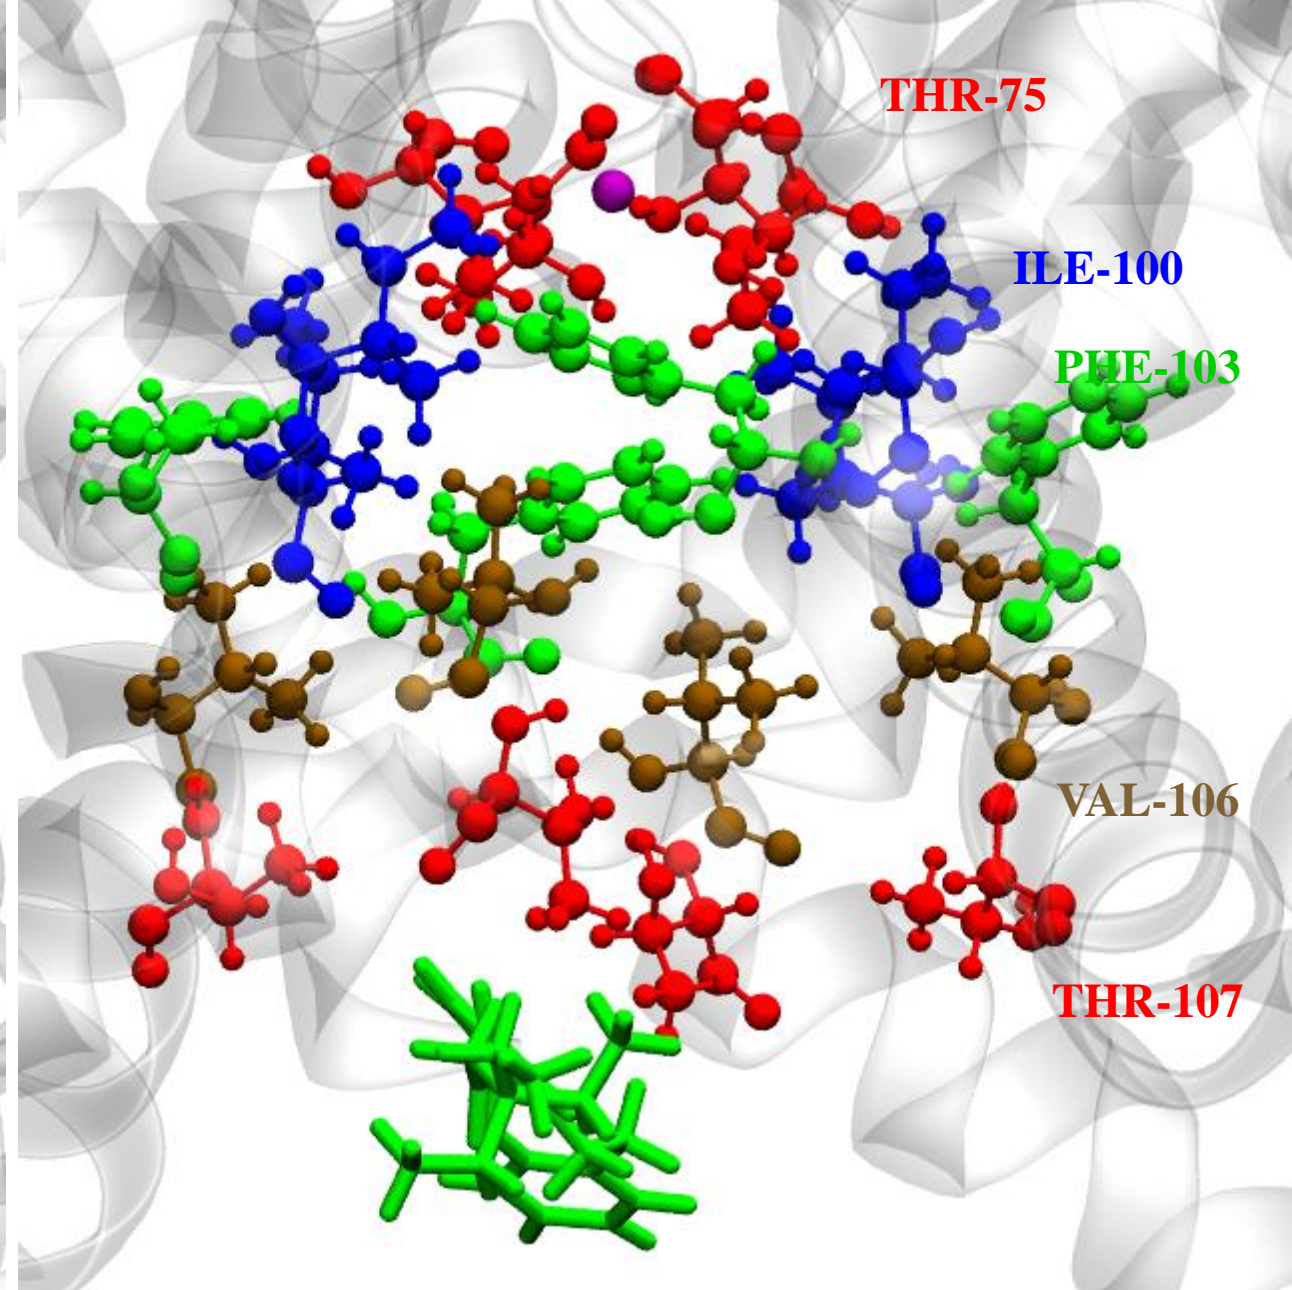

*E2 (C2)*

MM/PBSA Binding energy = -7.6 kcal/mol<sup>27</sup>

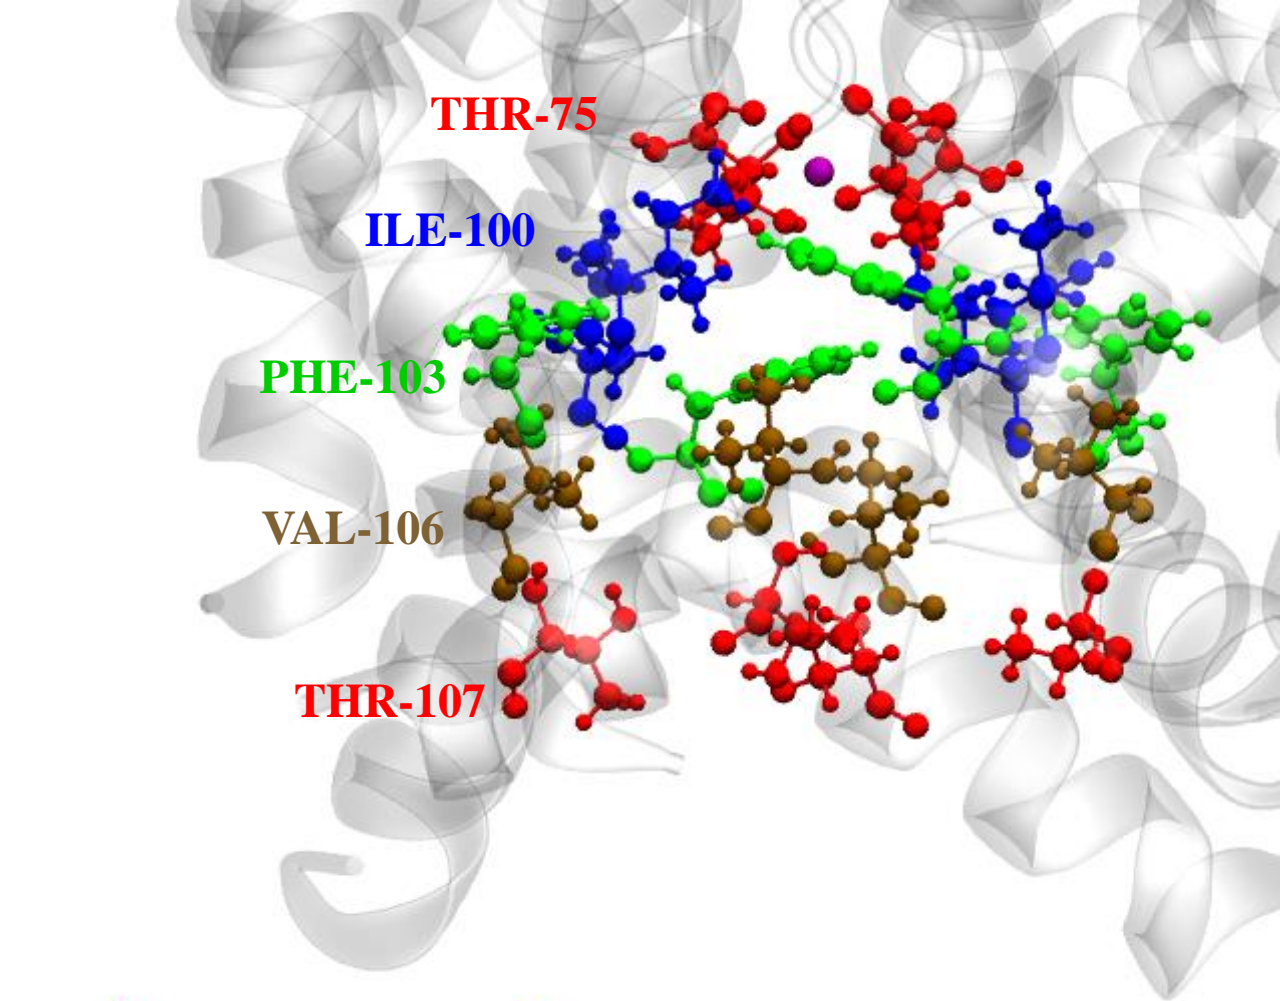

*E2 (C3)*

MM/PBSA Binding energy = -4.4 kcal/mol

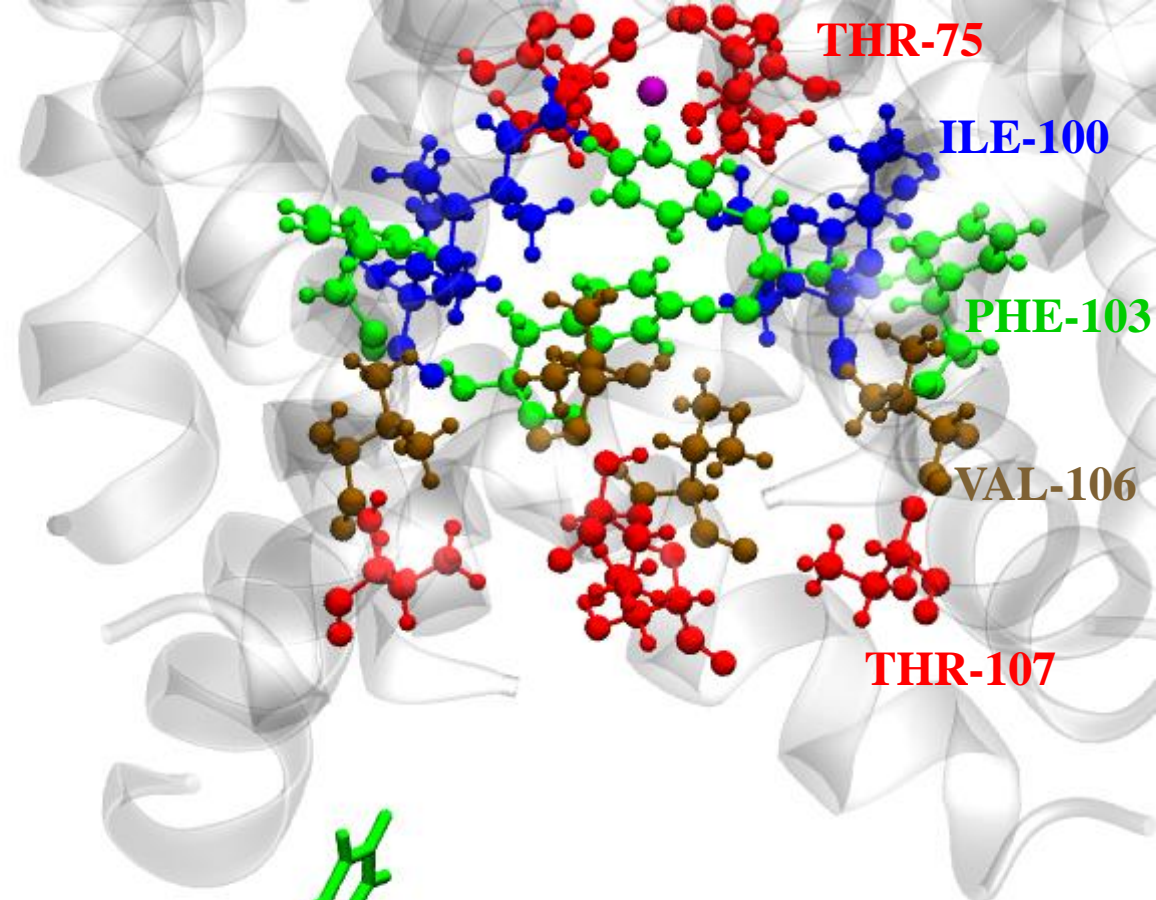

*E2 (C4)*

MM/PBSA Binding energy = -4.3 kcal/mol<sup>28</sup>

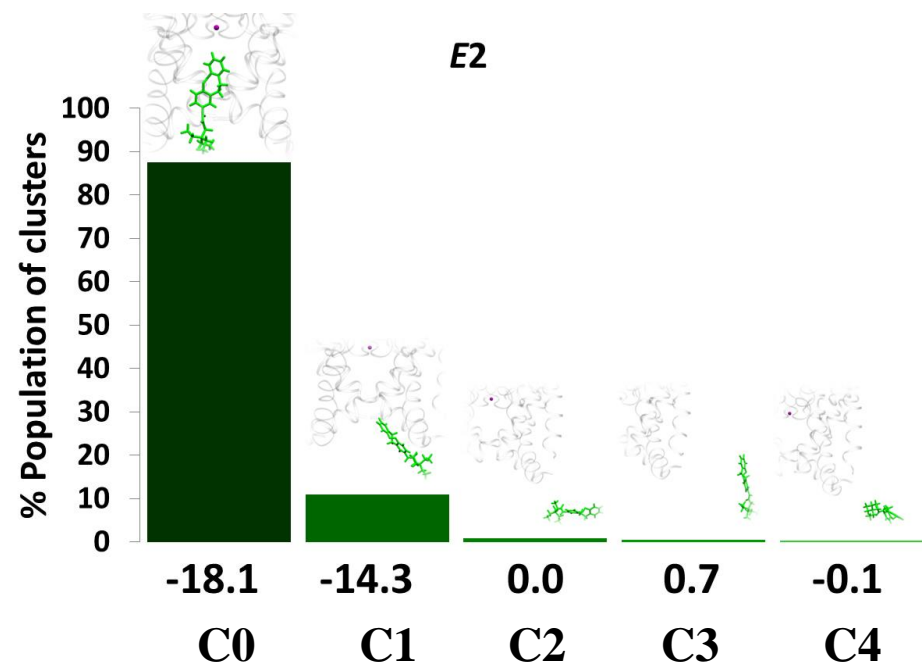

C<sub>n</sub> (n = 0 – 1) indicate different clusters. The percentage population of clusters is given on the Y-axis. Corresponding binding energy (B.E.) is given in kcal/mol on the X-axis. Protein is represented in new cartoon model with K<sup>+</sup>-ion (purple ball), and *E*-LAB-TEA is shown in stick model (green colour).

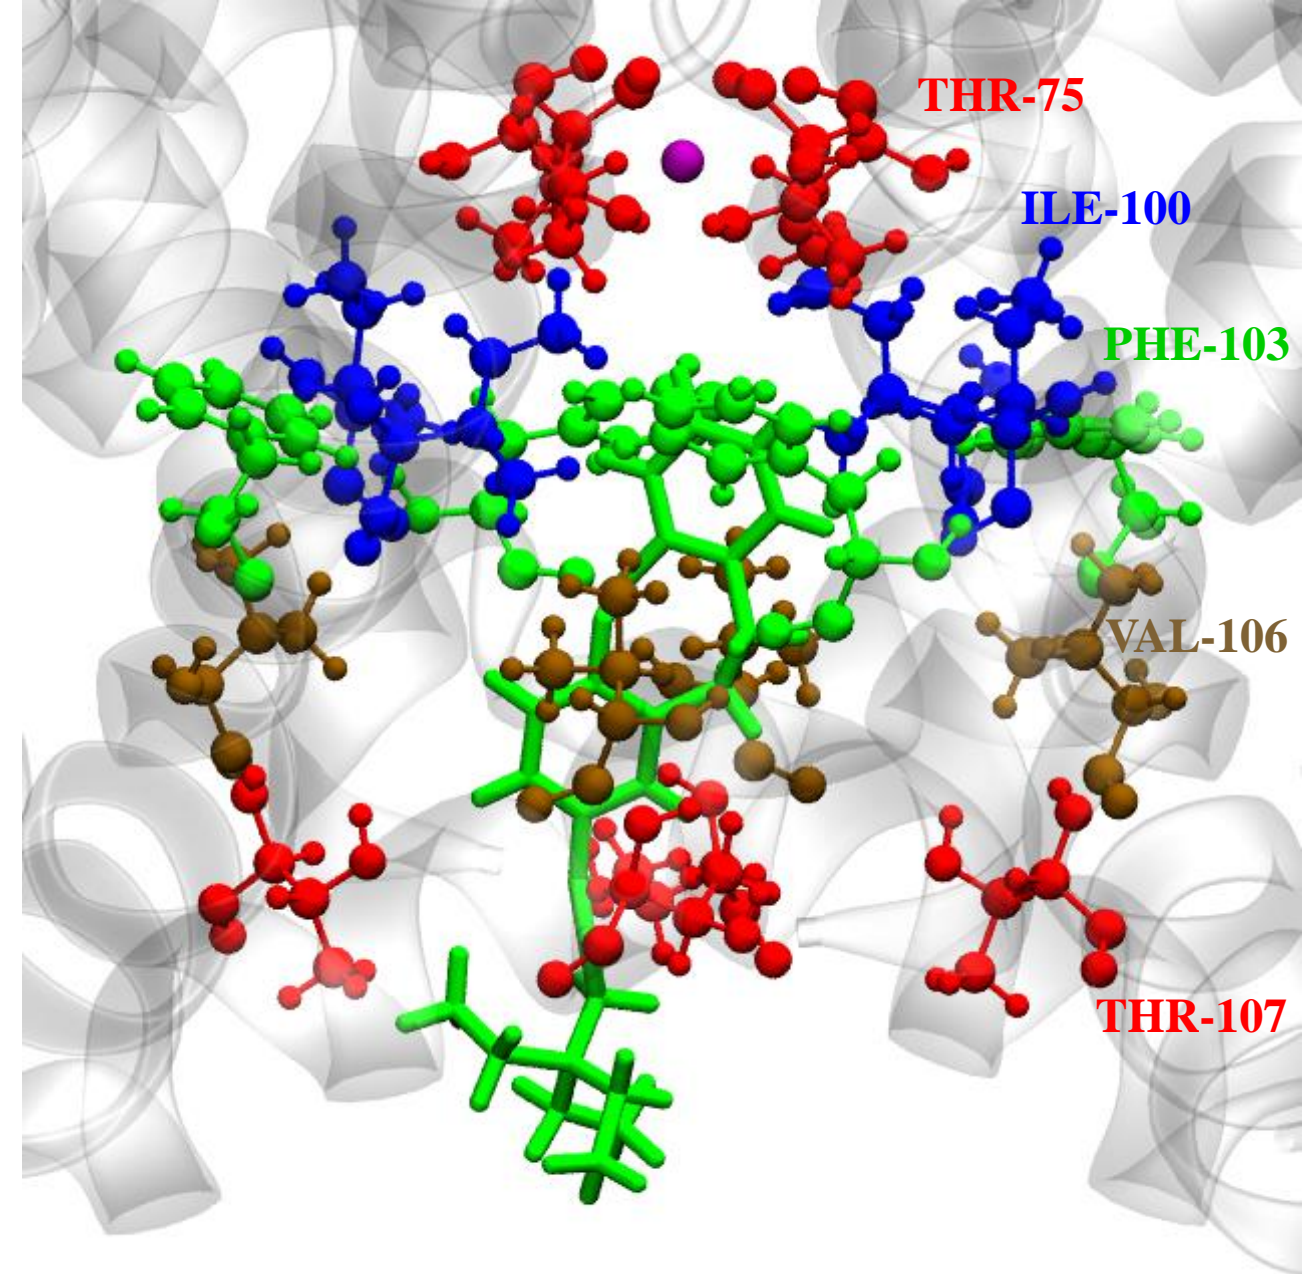

***E2* (C0)**  
**MM/PBSA Binding energy = -18.1 kcal/mol**<sup>29</sup>

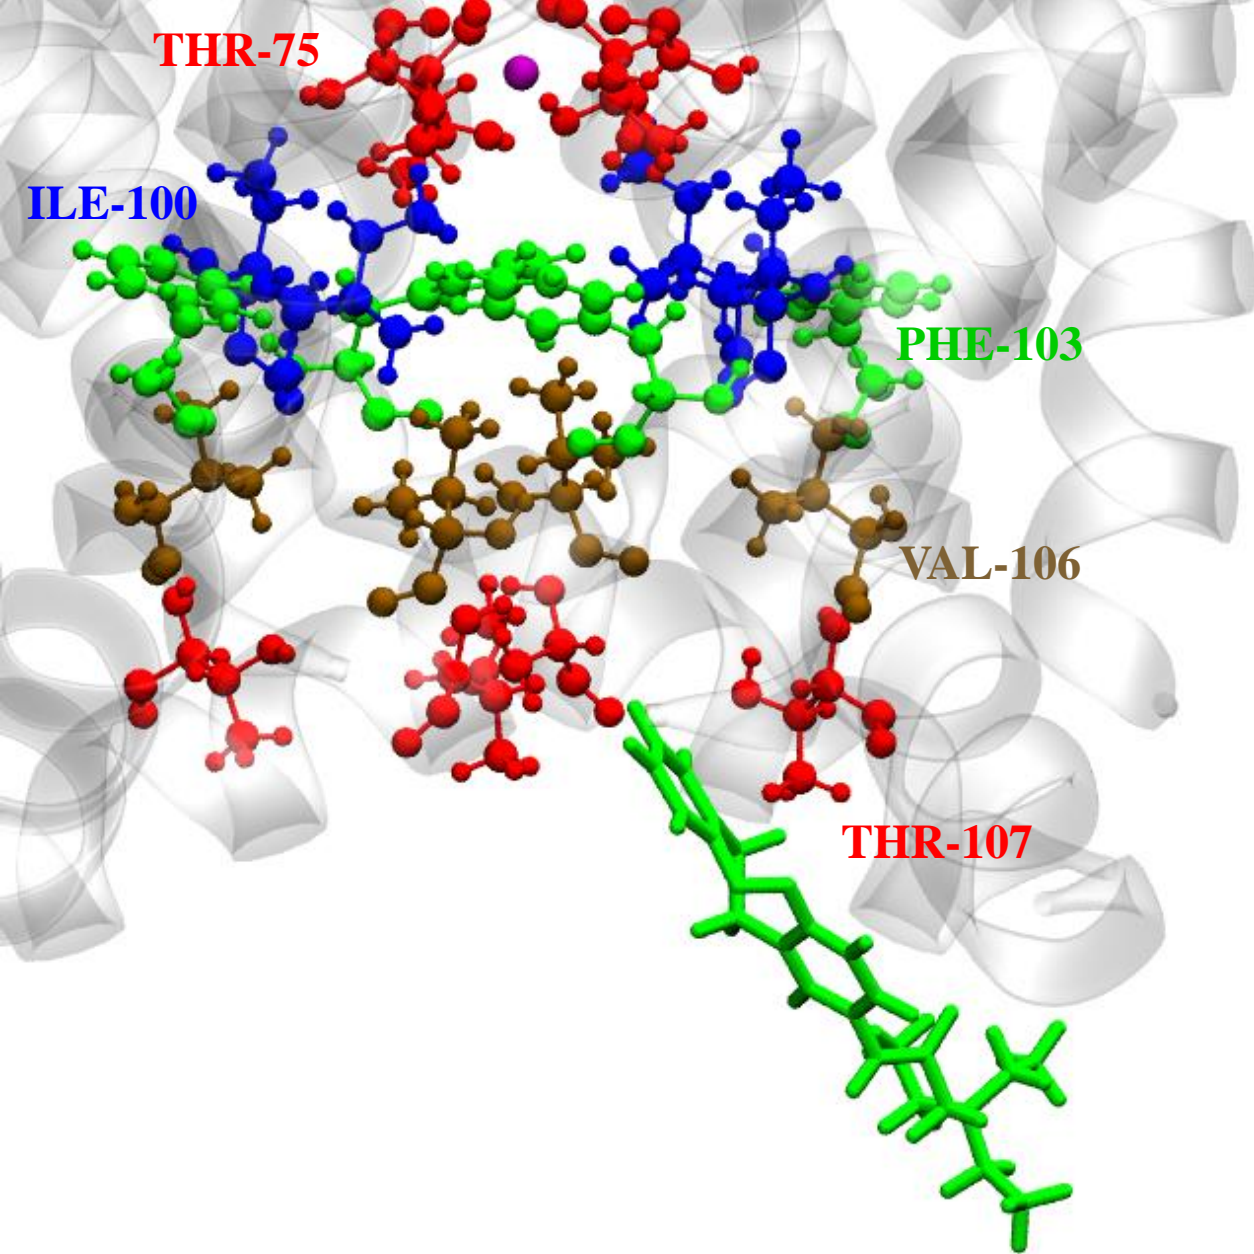

*E2 (C1)*

**MM/PBSA Binding energy = -14.3 kcal/mol**

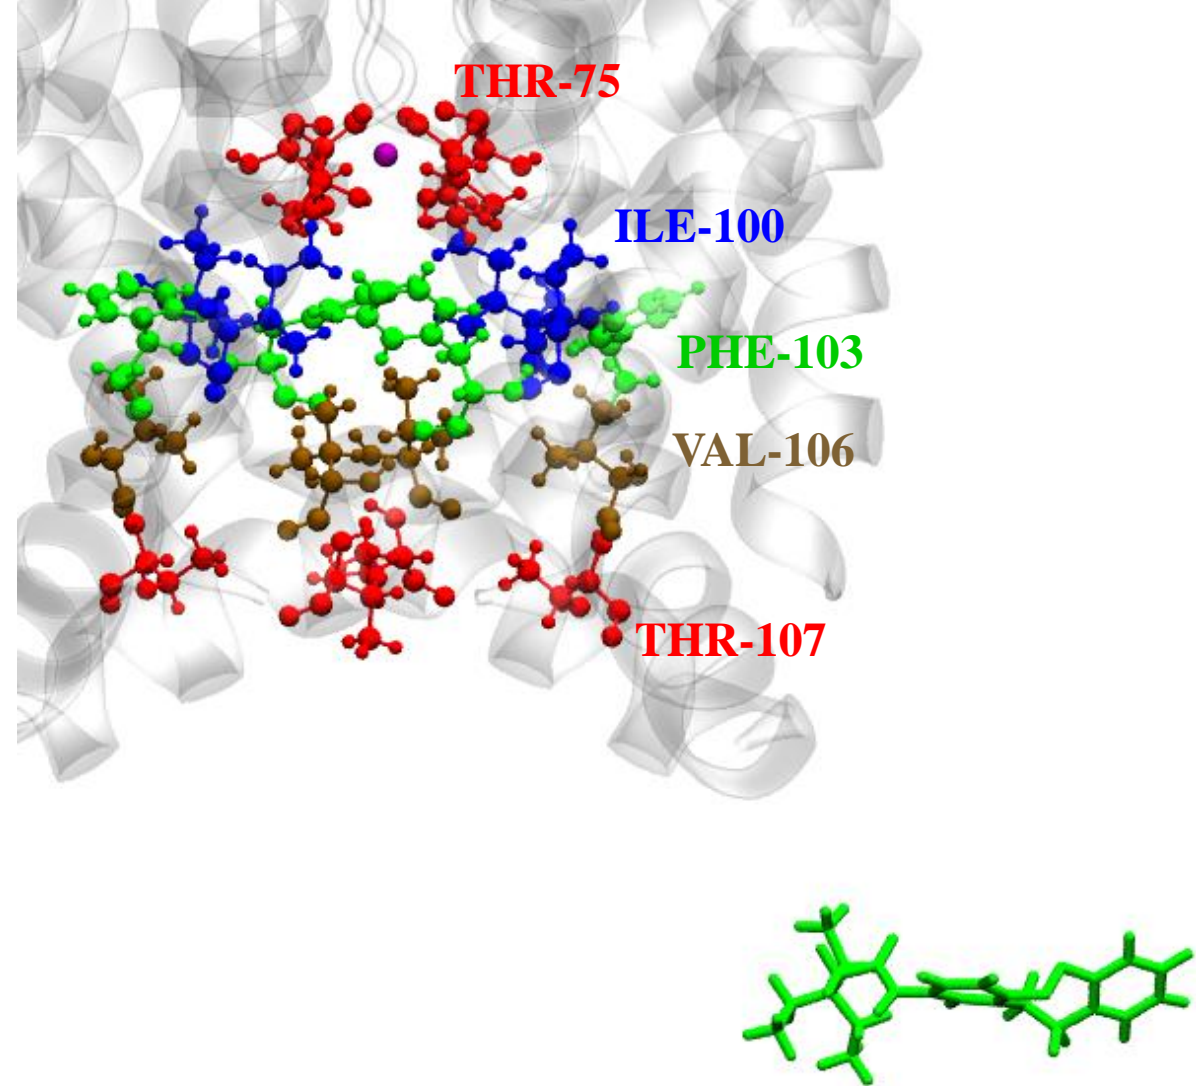

*E2 (C2)*

**MM/PBSA Binding energy = 0.0 kcal/mol**

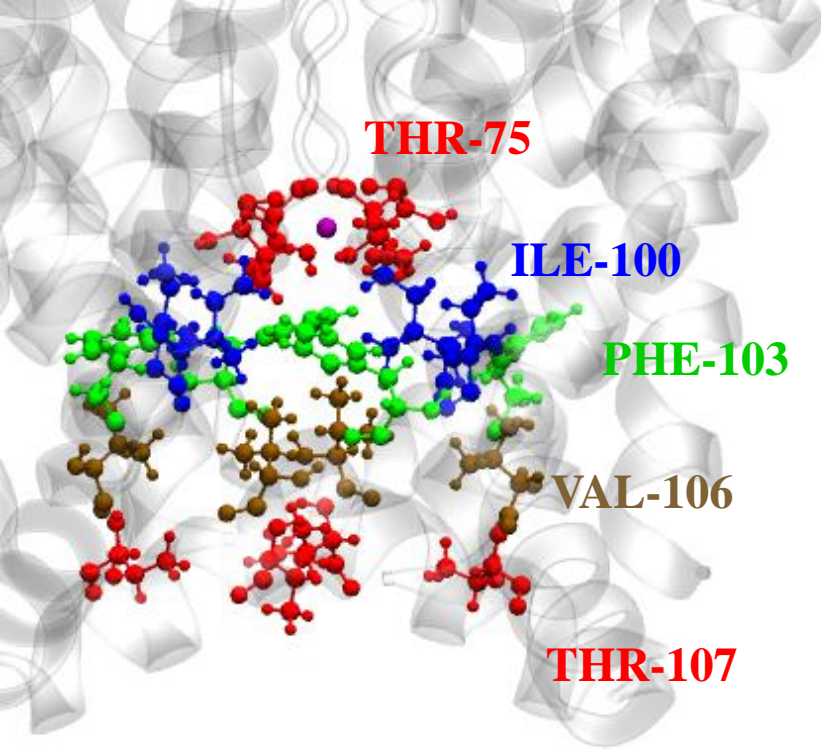

*E2 (C3)*

MM/PBSA Binding energy = 0.7 kcal/mol

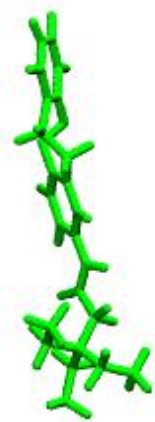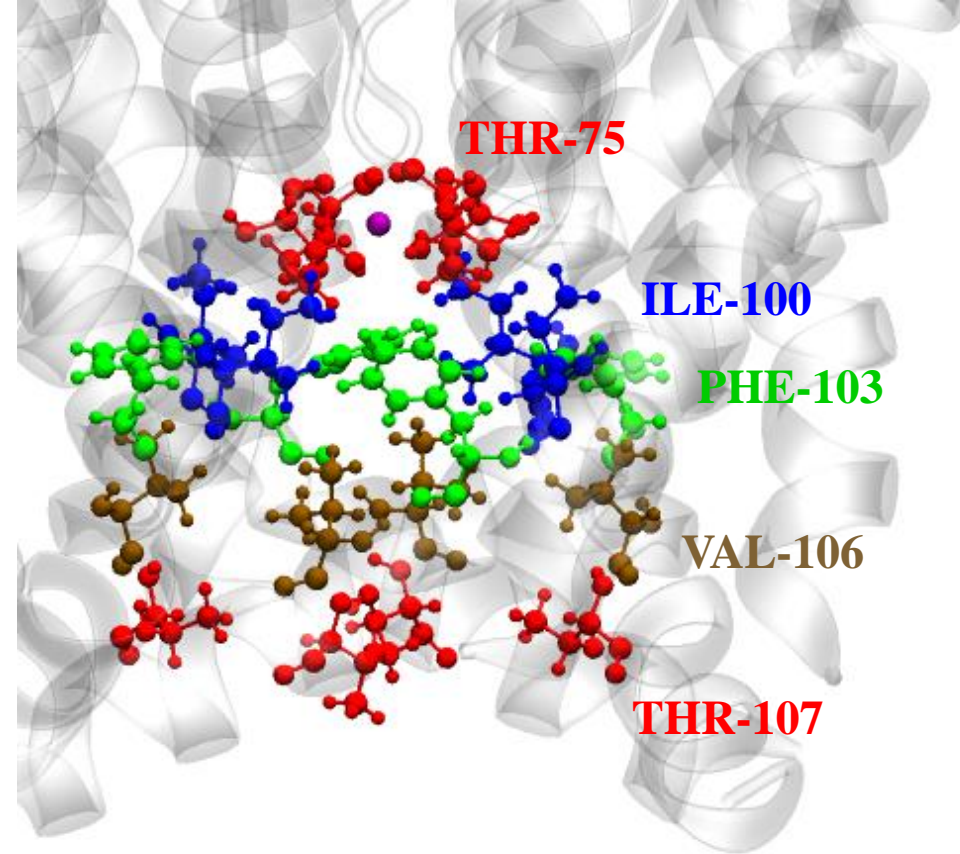

*E2 (C4)*

MM/PBSA Binding energy = -0.1 kcal/mol<sup>31</sup>

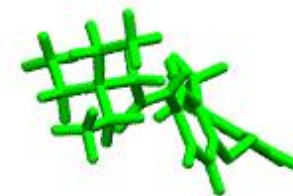

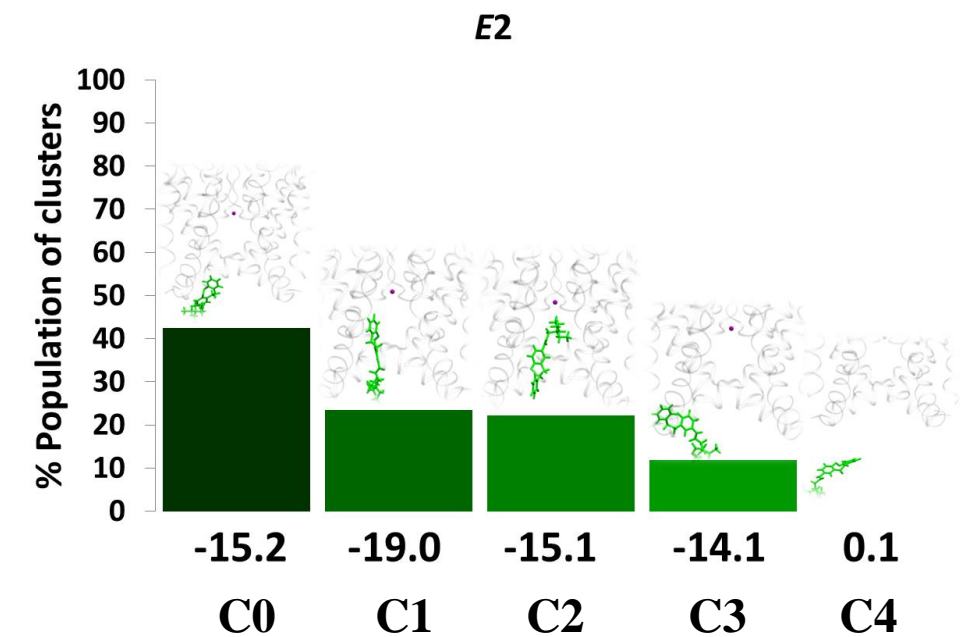

C<sub>n</sub> (n = 0 – 1) indicate different clusters. The percentage population of clusters is given on the Y-axis. Corresponding binding energy (B.E.) is given in kcal/mol on the X-axis. Protein is represented in new cartoon model with K<sup>+</sup>-ion (purple ball), and *E*-LAB-TEA is shown in stick model (green colour).

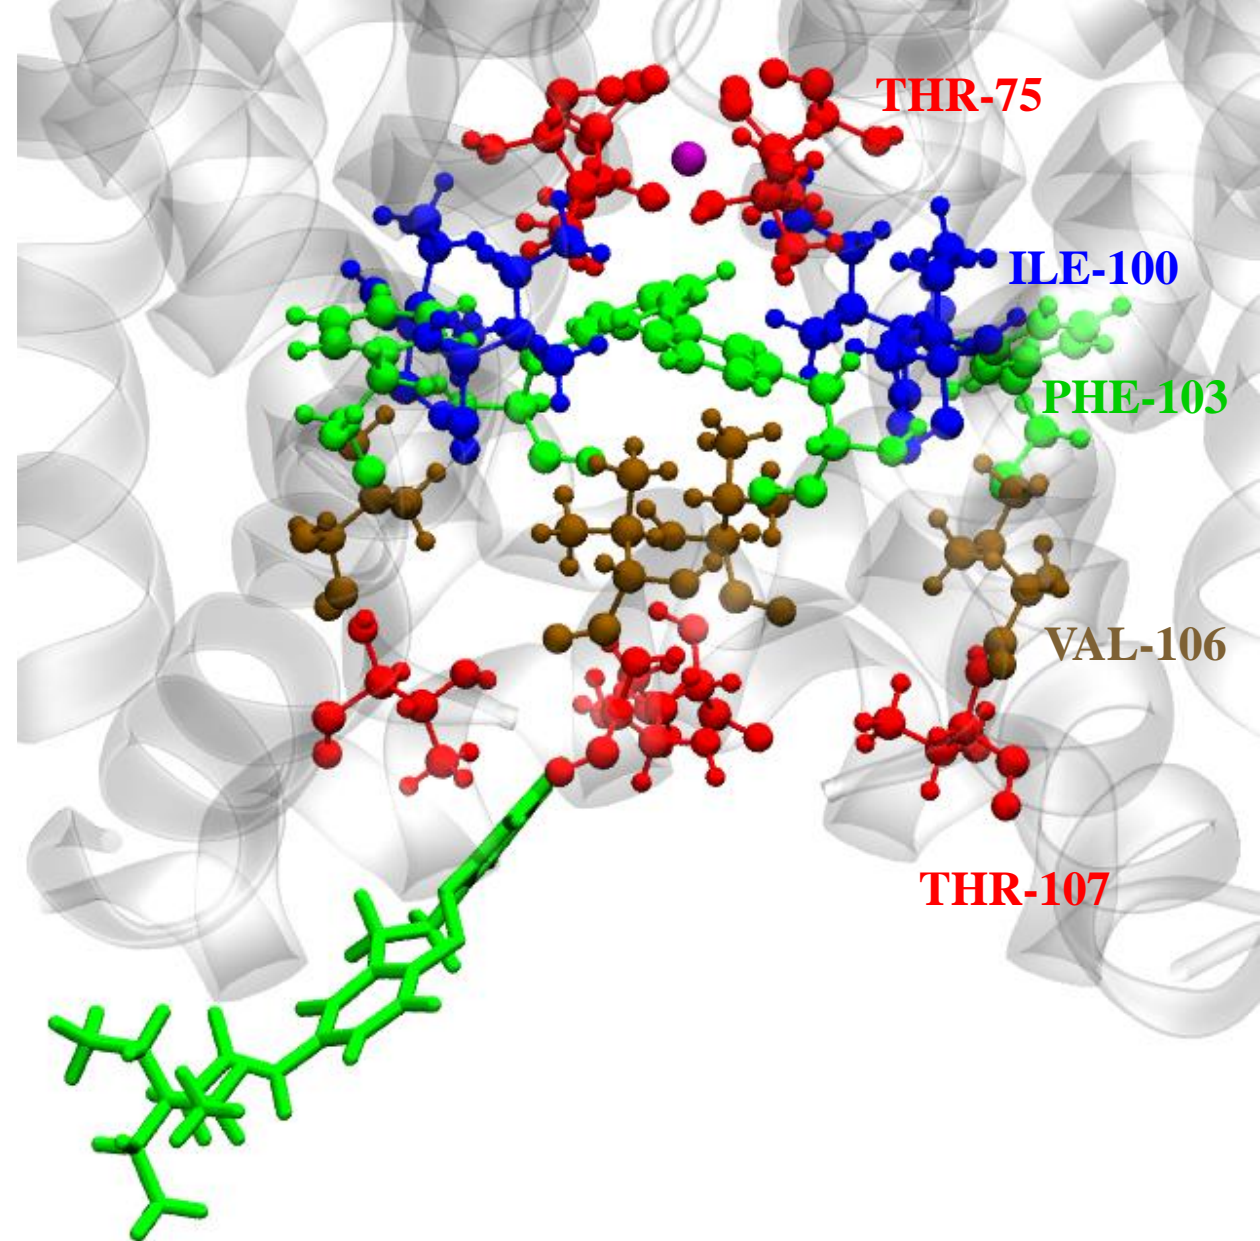

**E2 (C0)**  
**MM/PBSA Binding energy = -15.2 kcal/mol**<sup>32</sup>



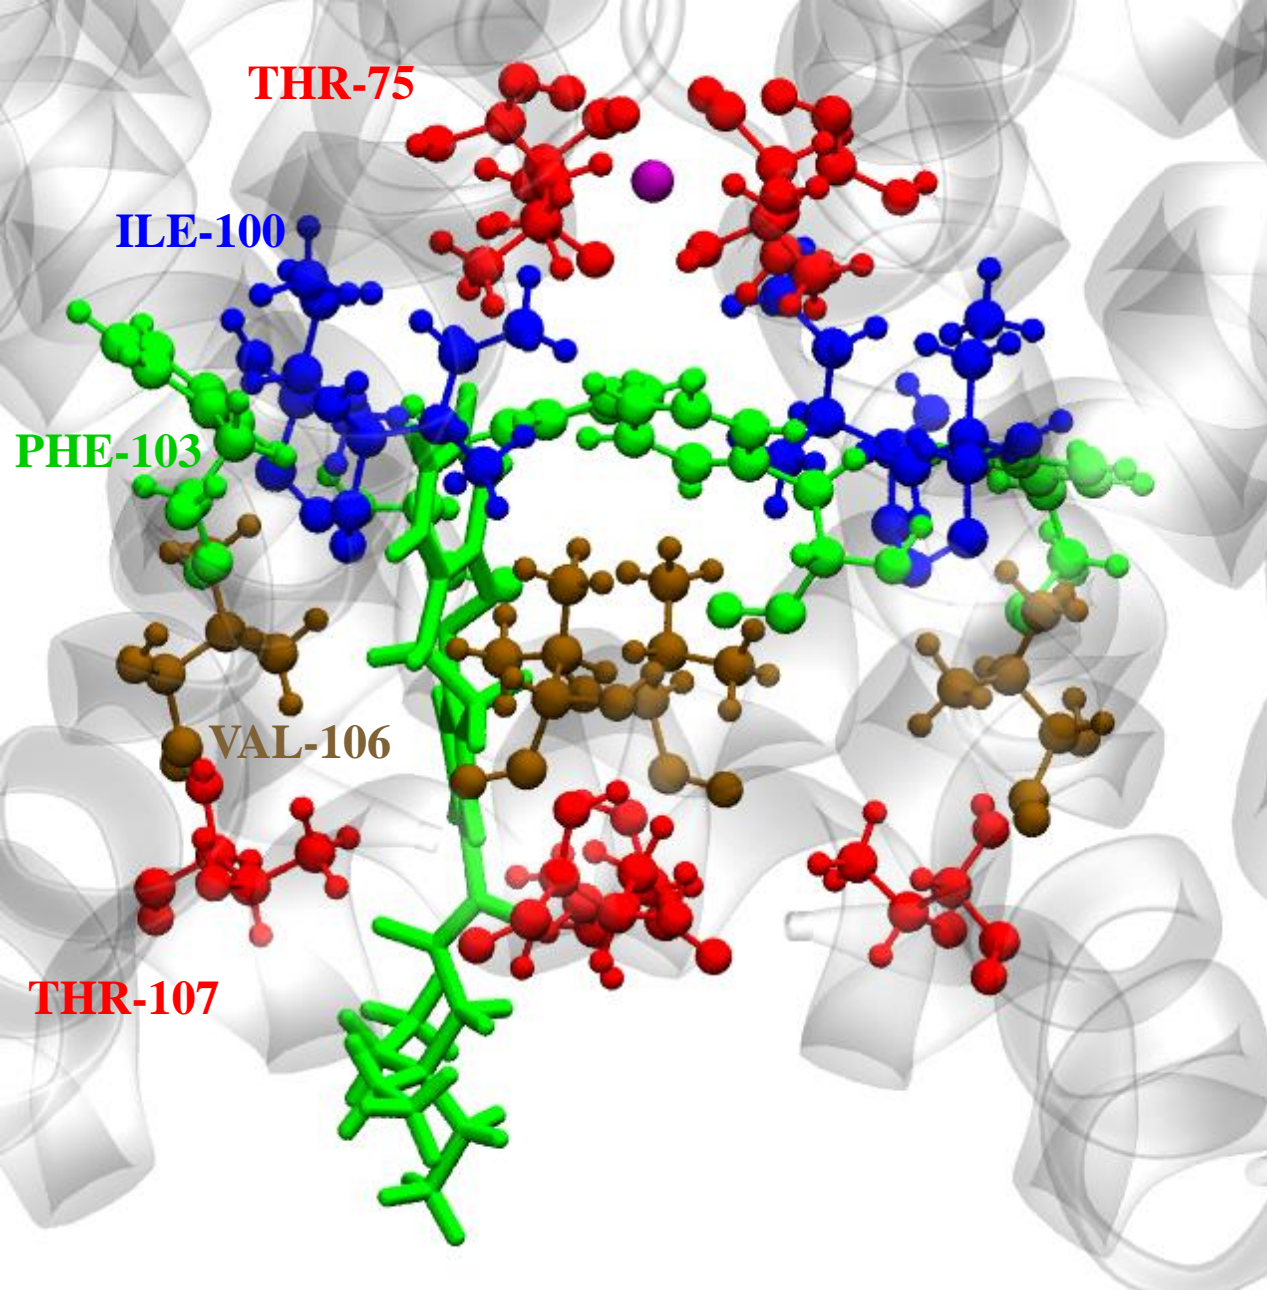

*E2 (C1)*

**MM/PBSA Binding energy = -19.0 kcal/mol**

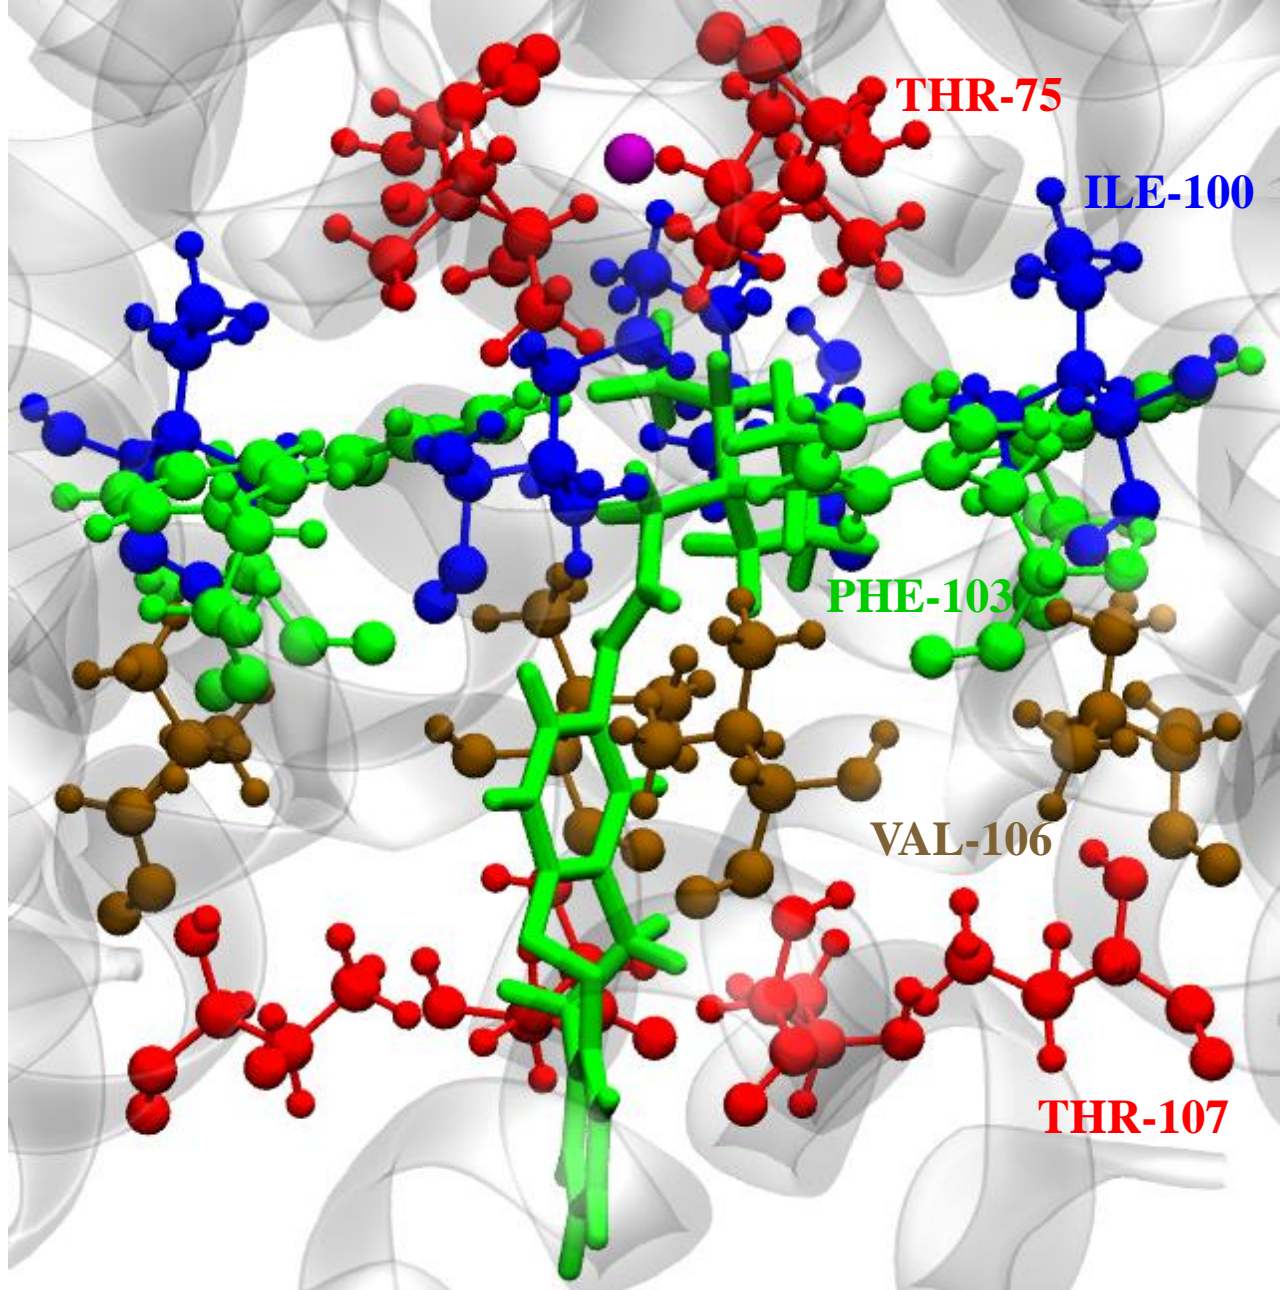

*E2 (C2)*

**MM/PBSA Binding energy = -15.1 kcal/mol<sup>33</sup>**

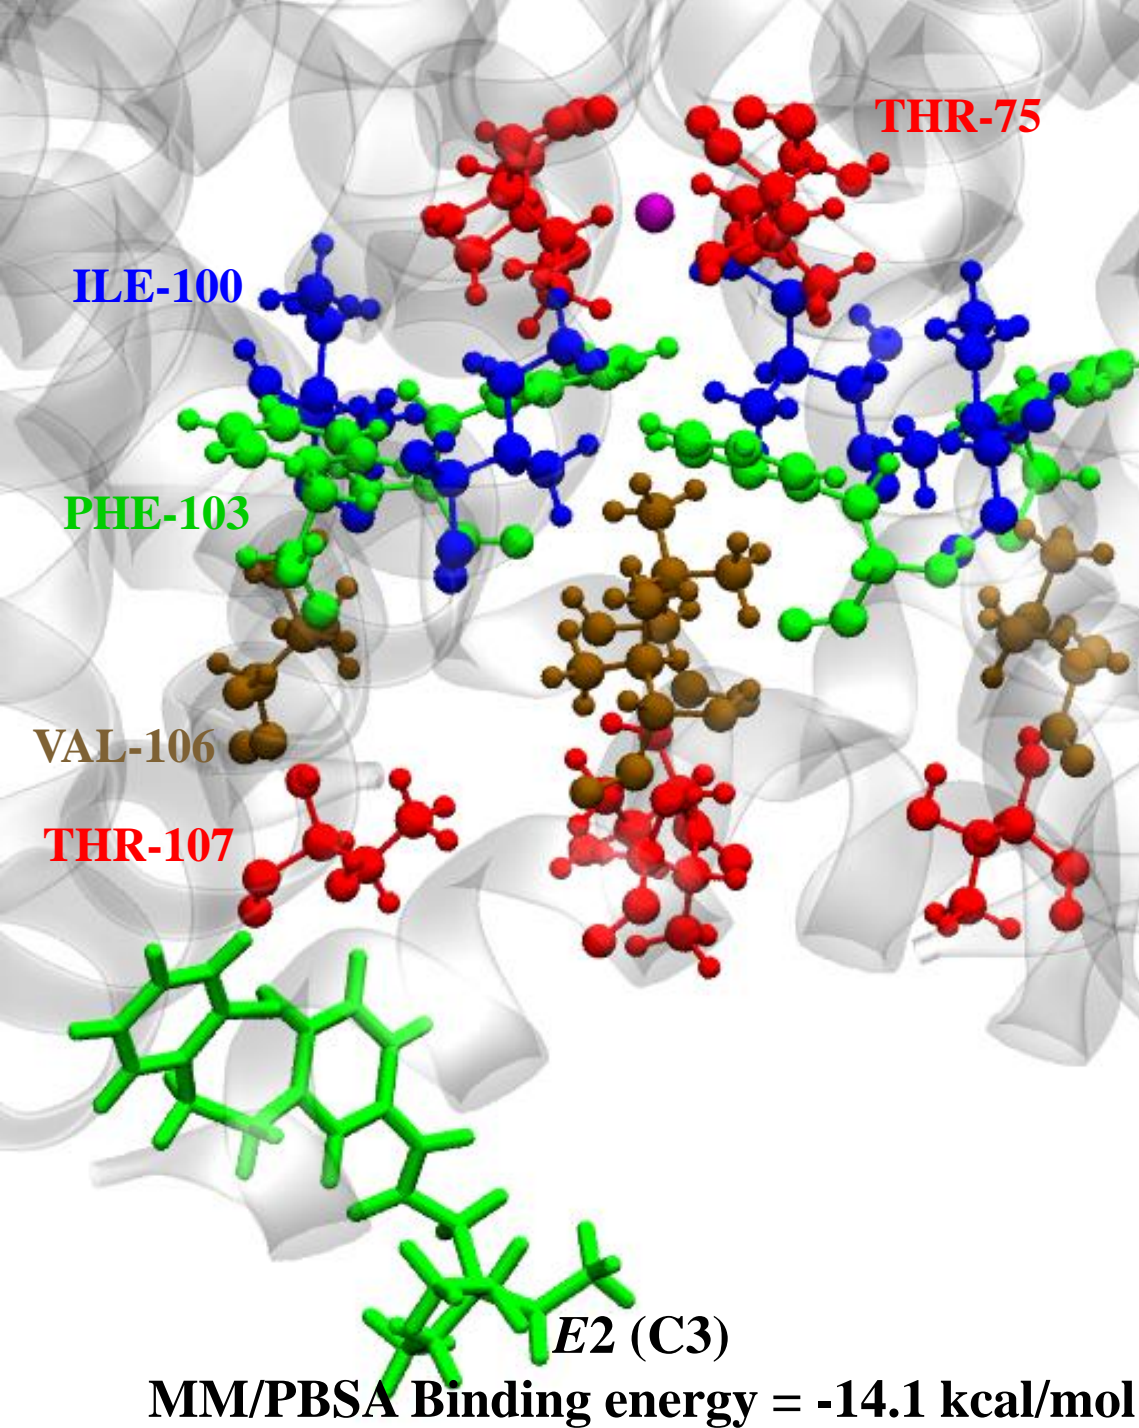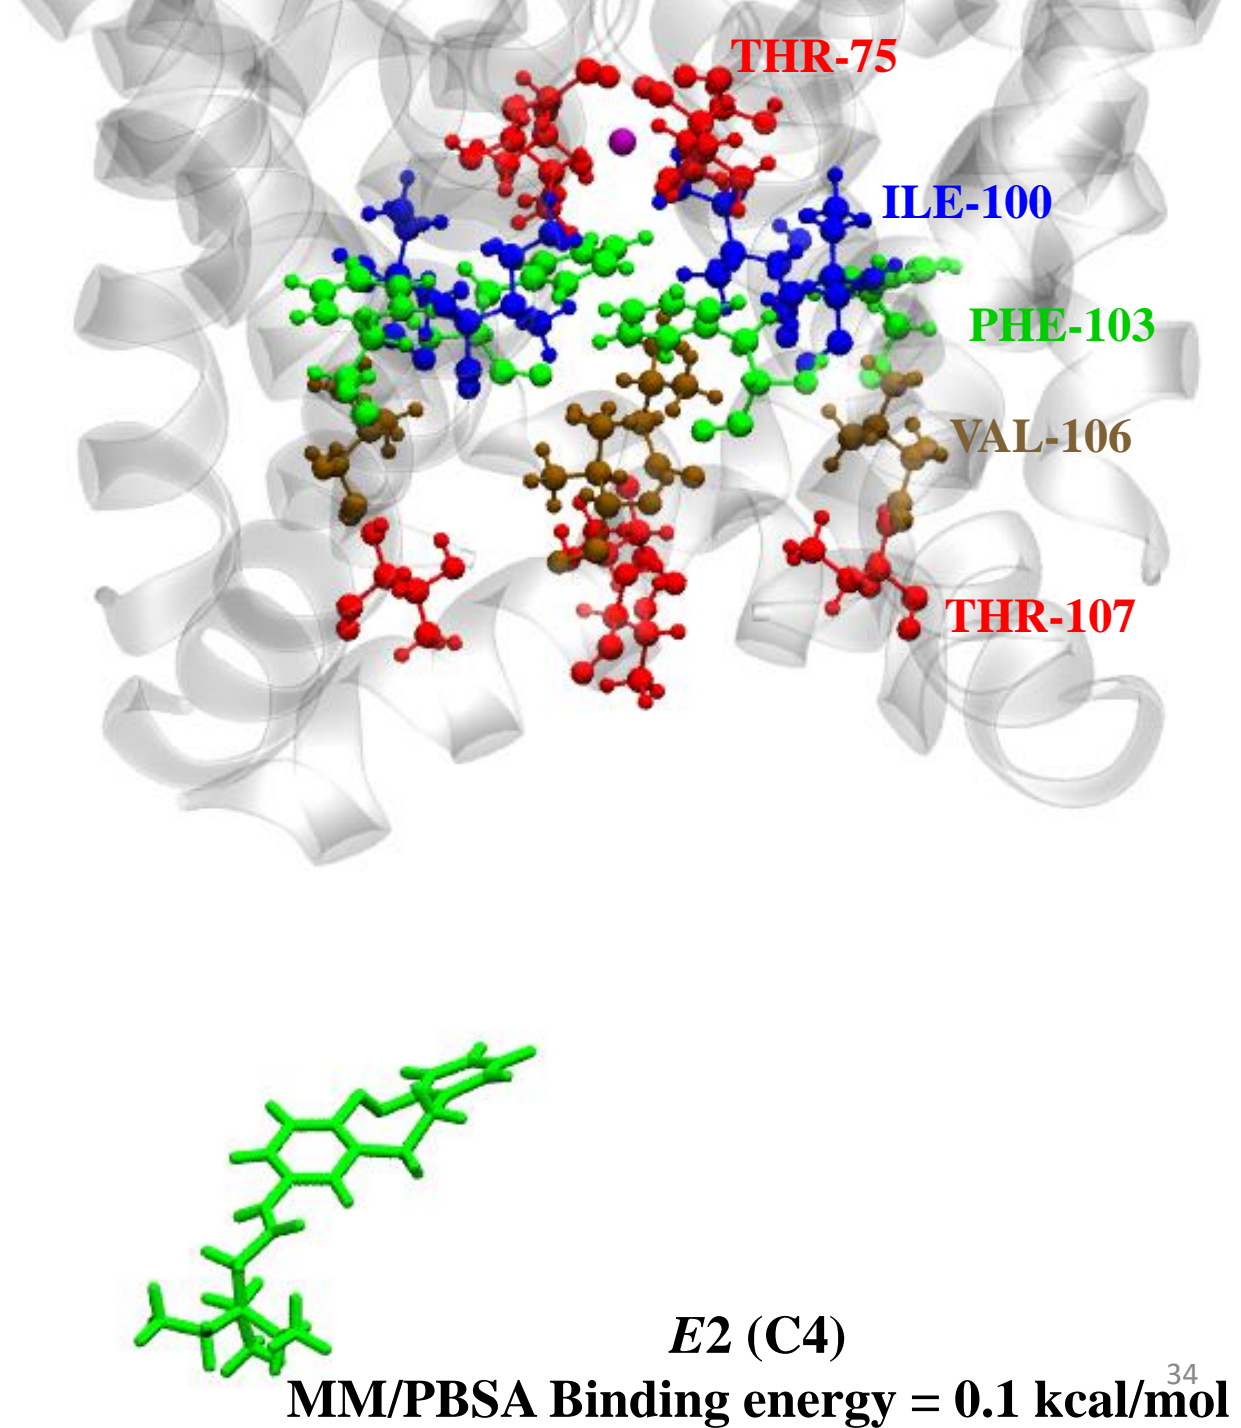

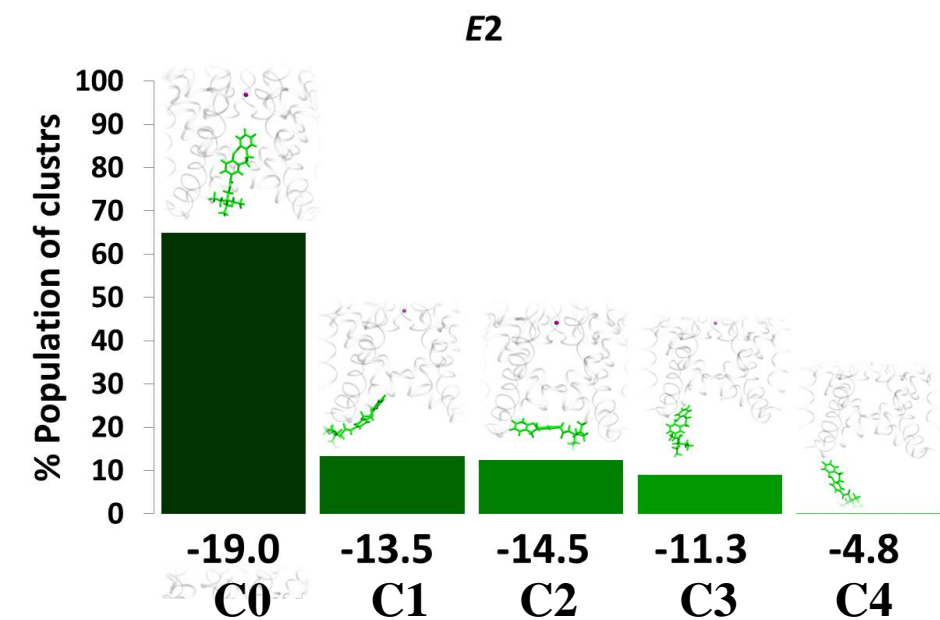

C<sub>n</sub> (n = 0 – 1) indicate different clusters. The percentage population of clusters is given on the Y-axis. Corresponding binding energy (B.E.) is given in kcal/mol on the X-axis. Protein is represented in new cartoon model with K<sup>+</sup>-ion (purple ball), and *E*-LAB-TEA is shown in stick model (green colour).

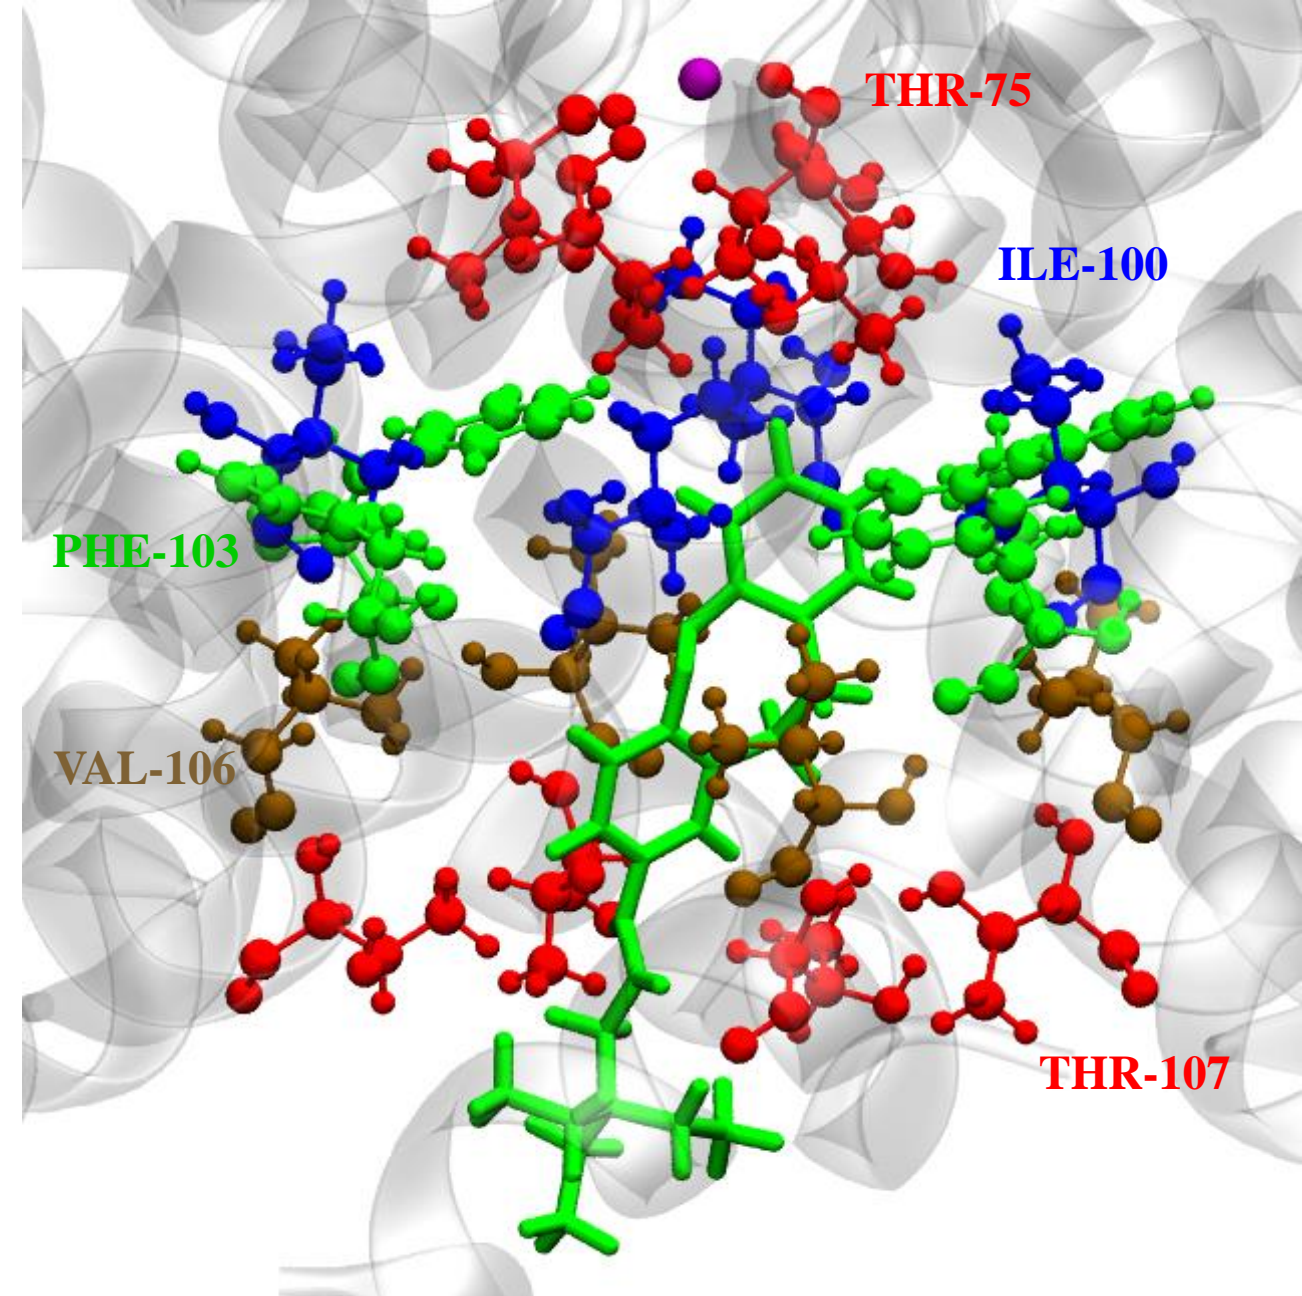

***E*2 (C0)**  
**MM/PBSA Binding energy = -19.0 kcal/mol**<sup>35</sup>

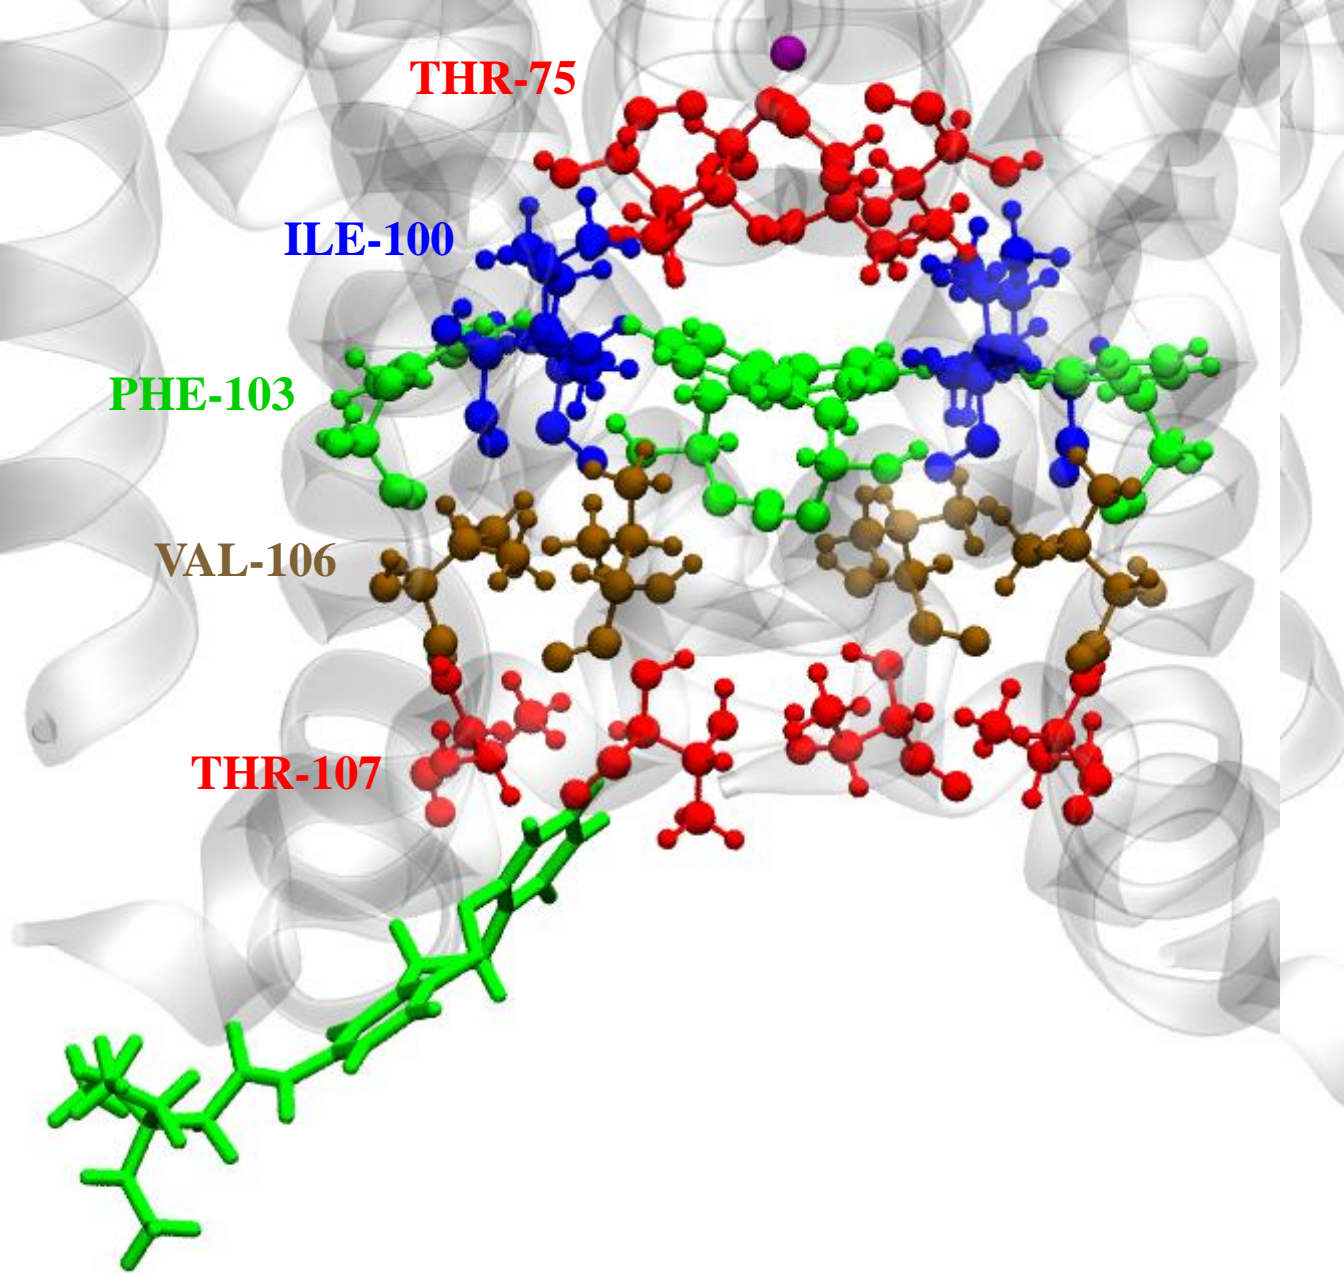

*E2 (C1)*

**MM/PBSA Binding energy = -13.5 kcal/mol**

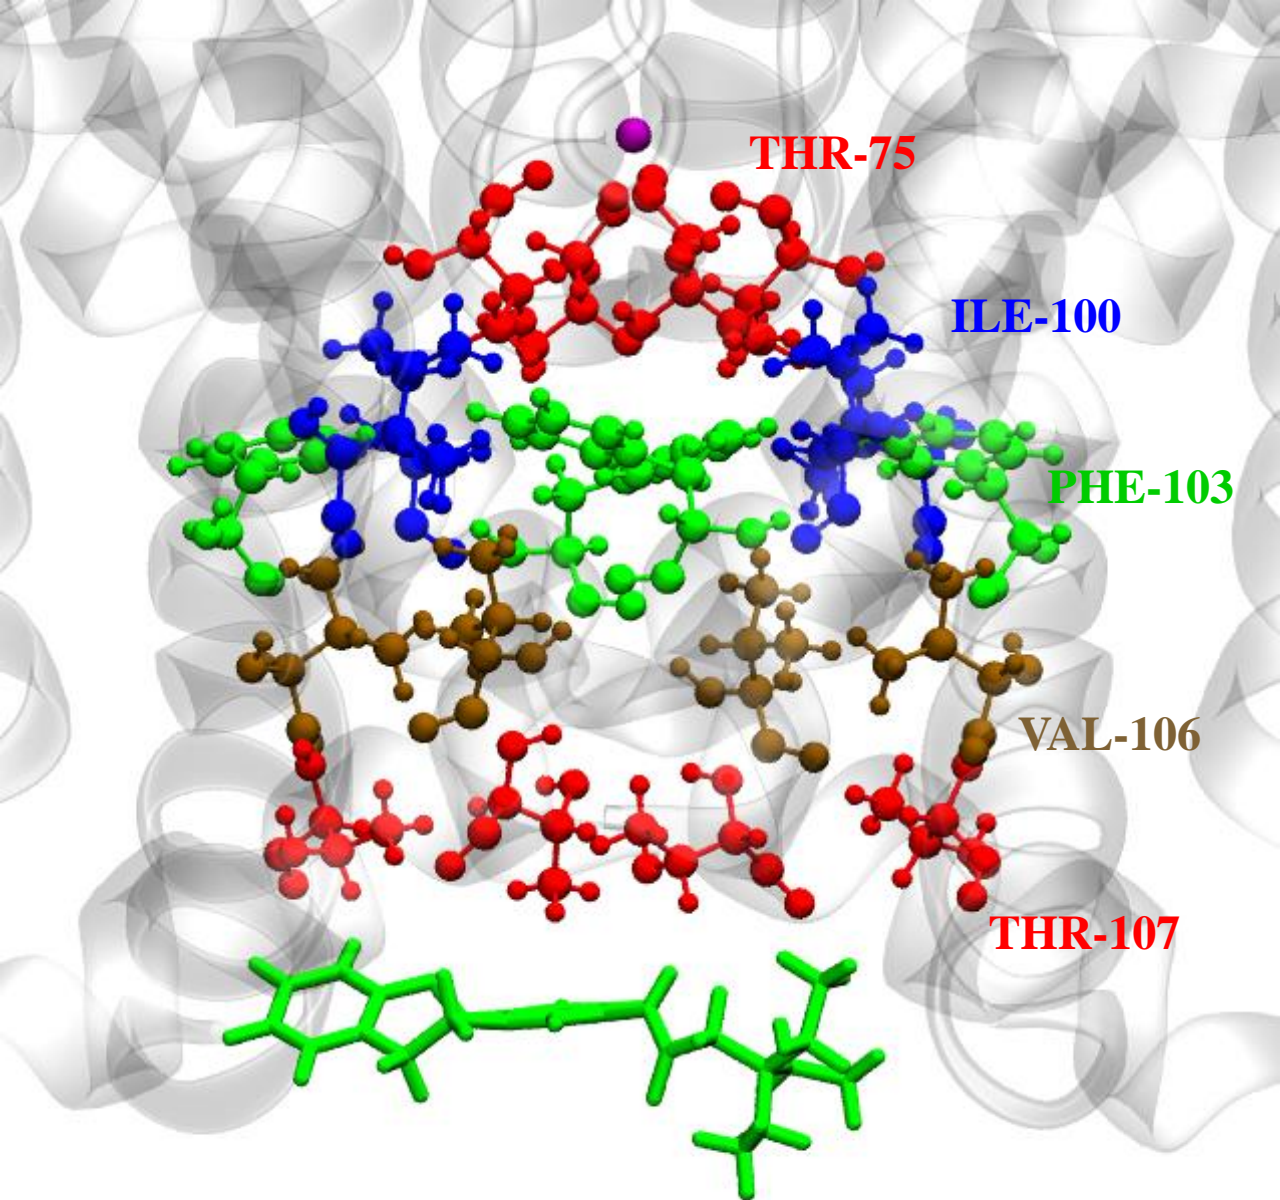

*E2 (C2)*

**MM/PBSA Binding energy = -14.5 kcal/mol<sup>36</sup>**

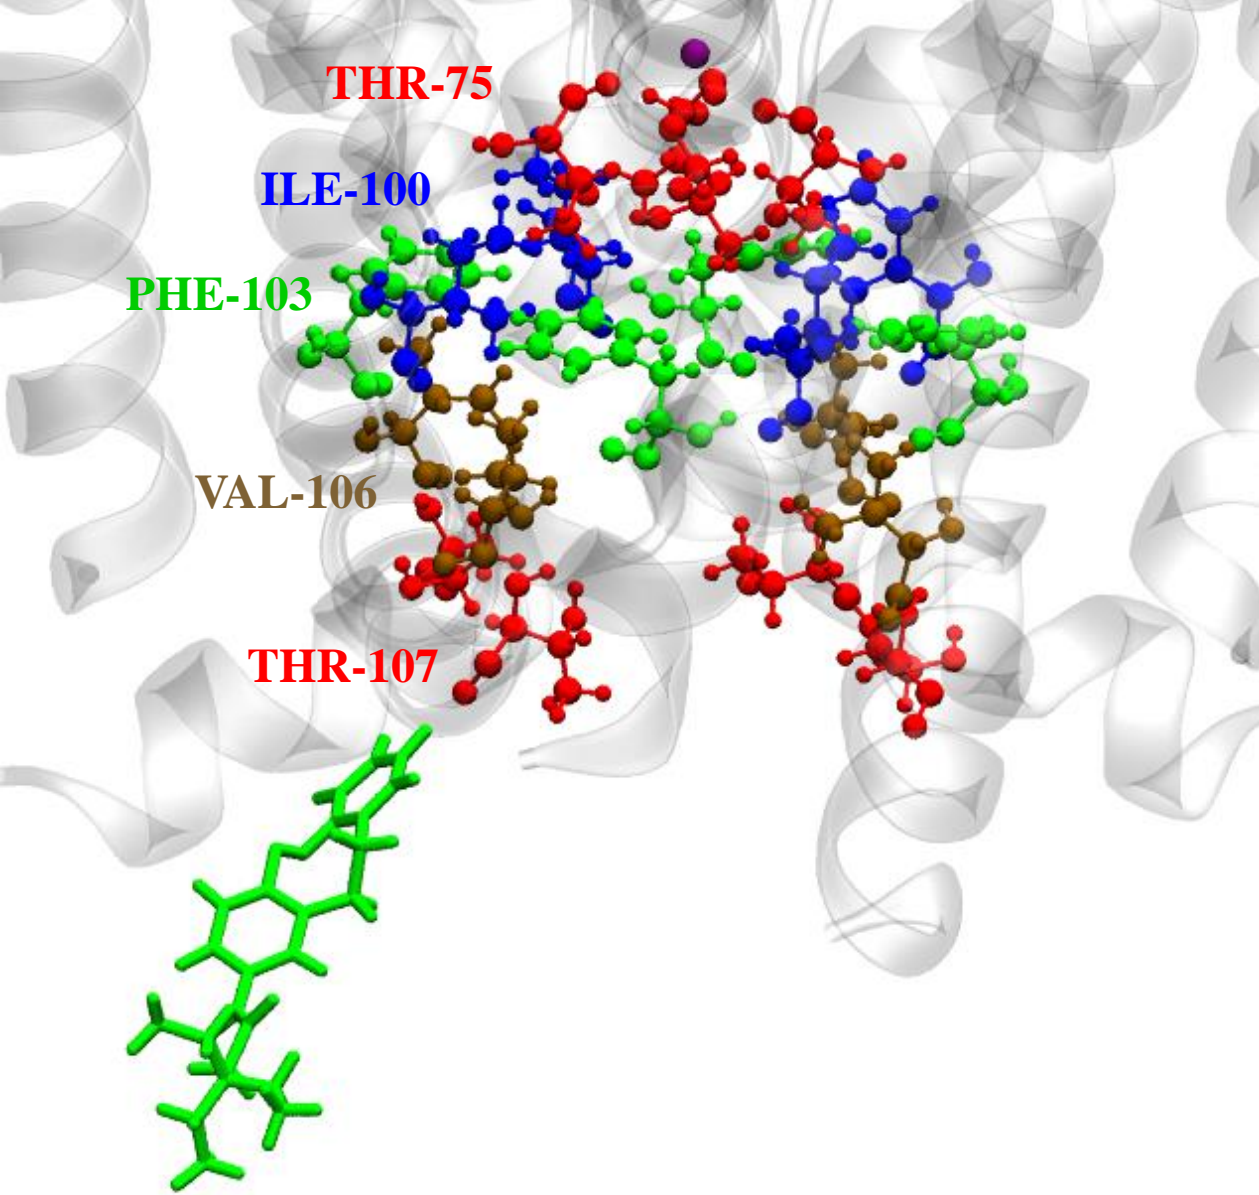

*E2 (C3)*

MM/PBSA Binding energy = -11.3 kcal/mol

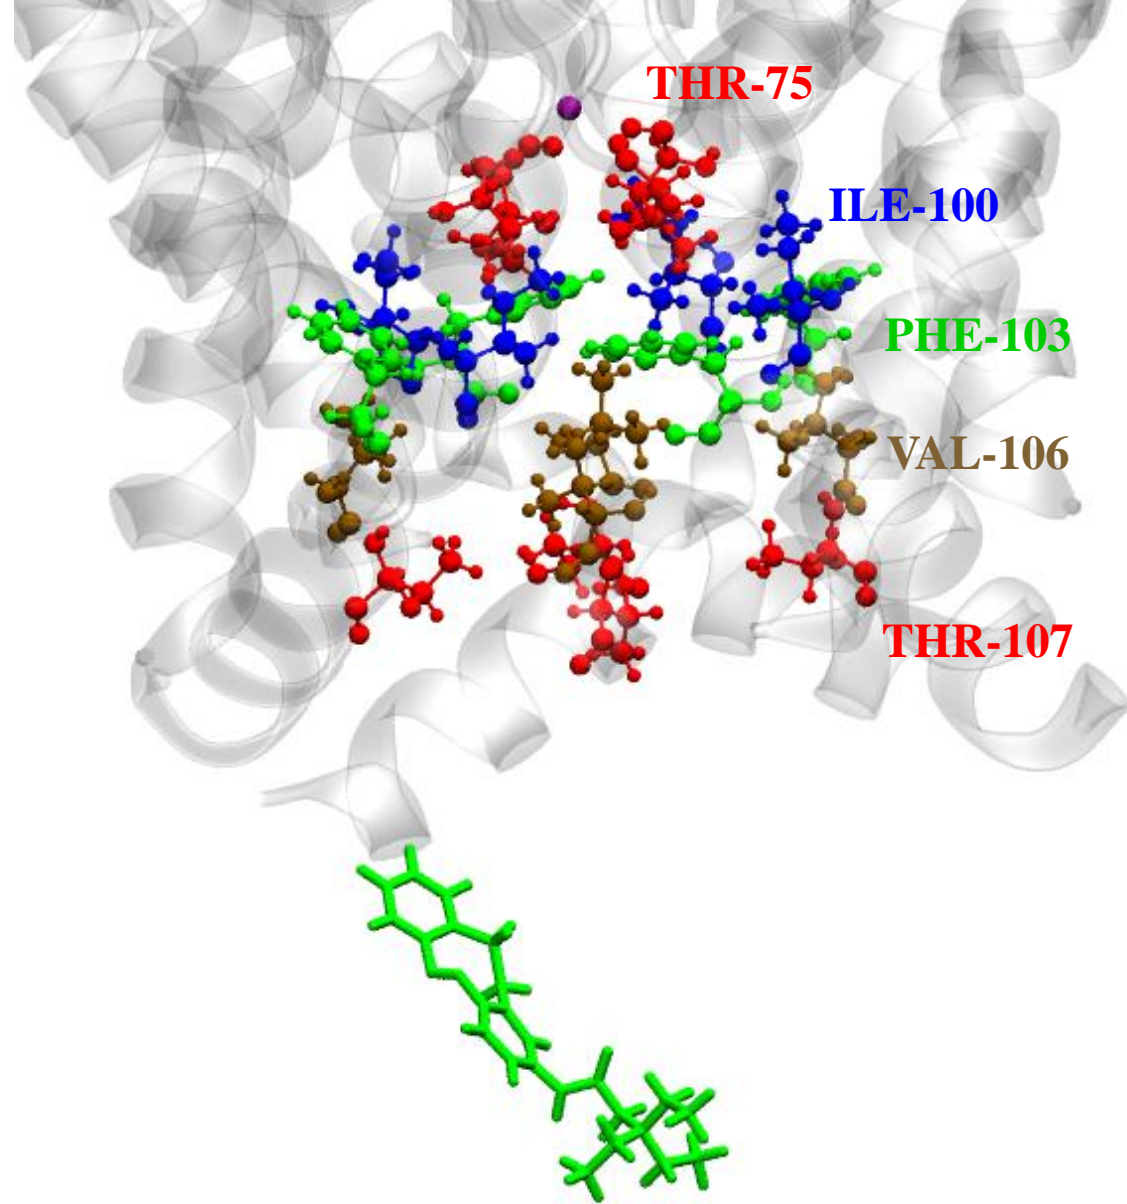

*E2 (C4)*

MM/PBSA Binding energy = -4.8 kcal/mol<sup>37</sup>

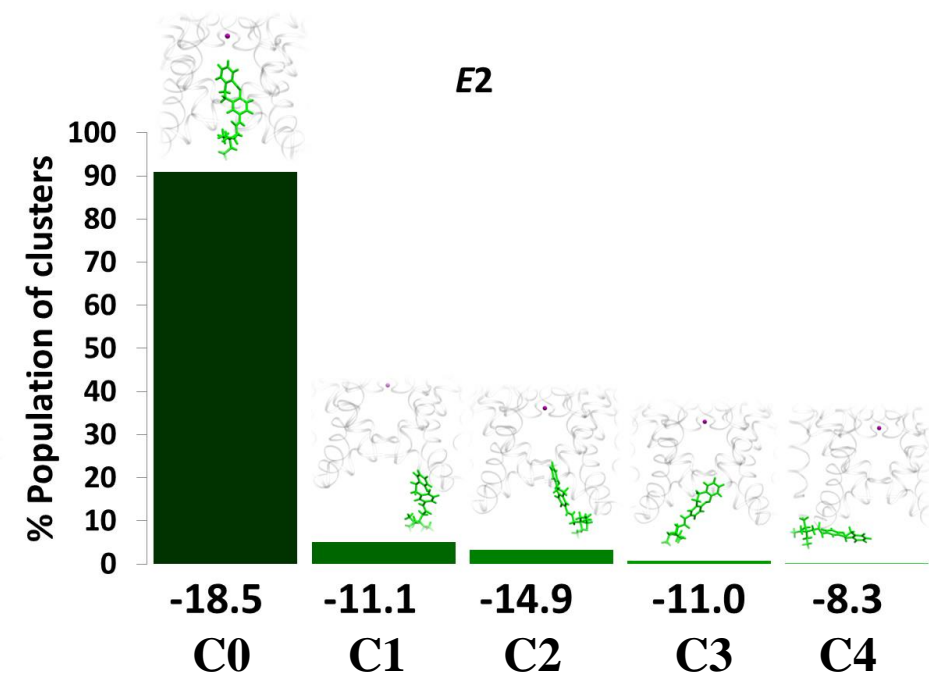

C<sub>n</sub> (n = 0 – 1) indicate different clusters. The percentage population of clusters is given on the Y-axis. Corresponding binding energy (B.E.) is given in kcal/mol on the X-axis. Protein is represented in new cartoon model with K<sup>+</sup>-ion (purple ball), and *E*-LAB-TEA is shown in stick model (green colour).

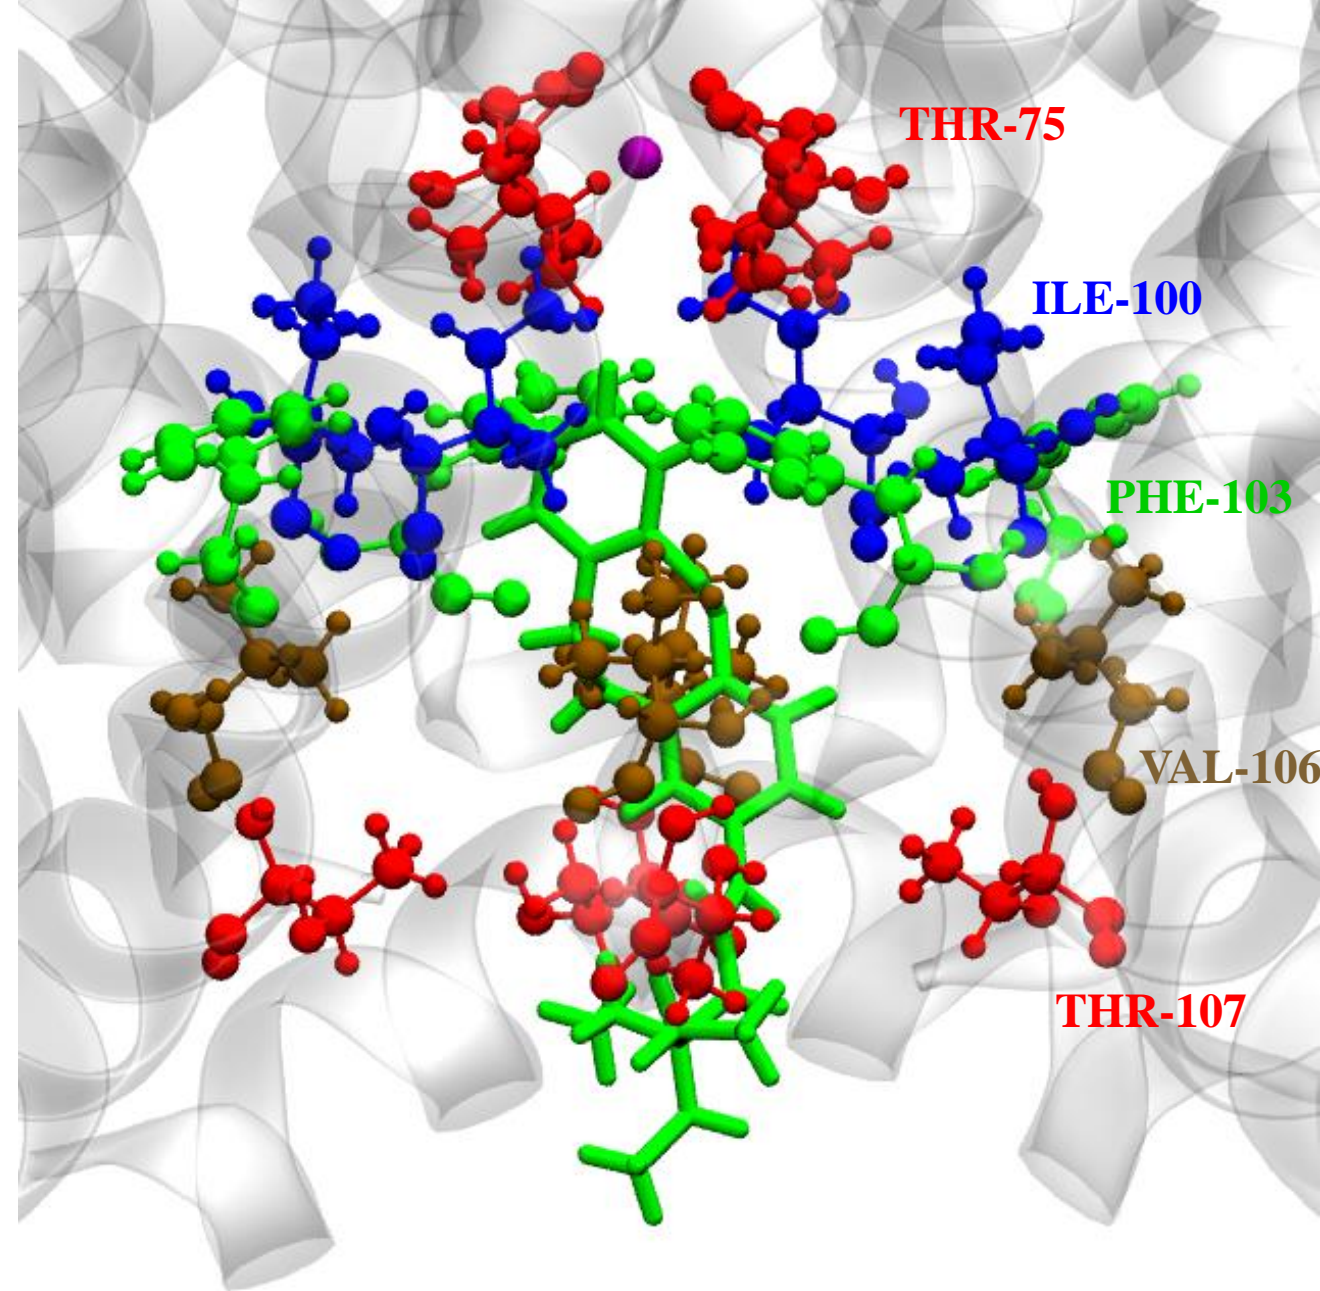

***E*2 (C0)**  
**MM/PBSA Binding energy = -18.5 kcal/mol**<sup>38</sup>

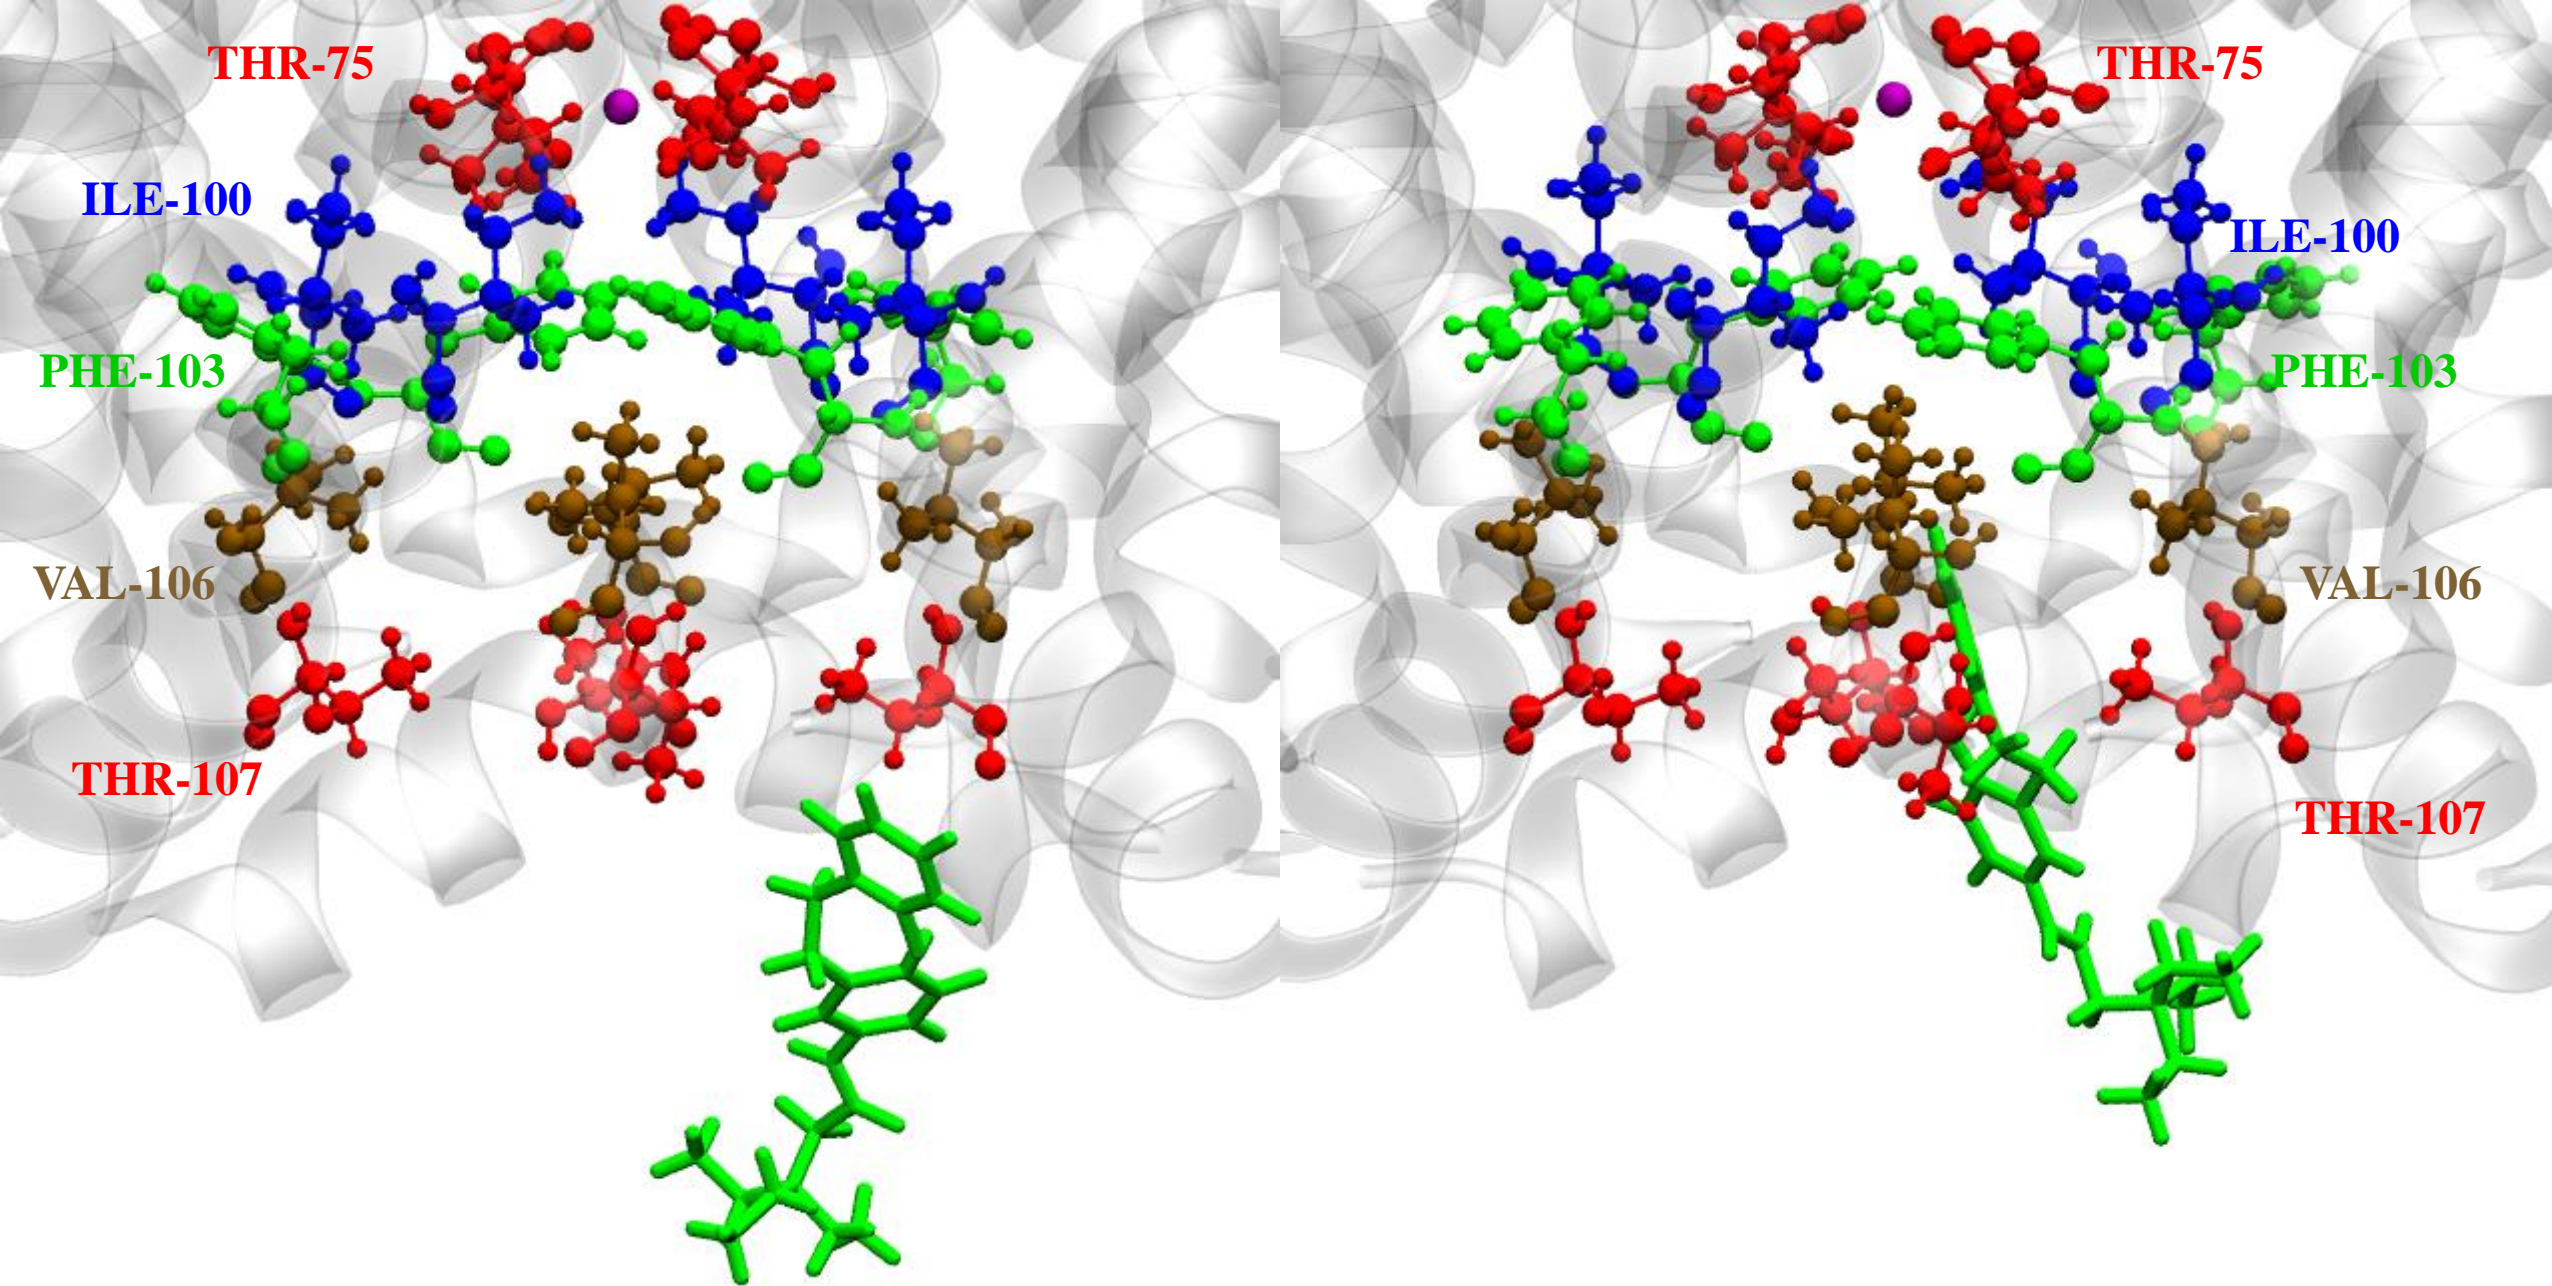

*E2 (C1)*

**MM/PBSA Binding energy = -11.1 kcal/mol**

*E2 (C2)*

**MM/PBSA Binding energy = -14.9 kcal/mol<sup>39</sup>**

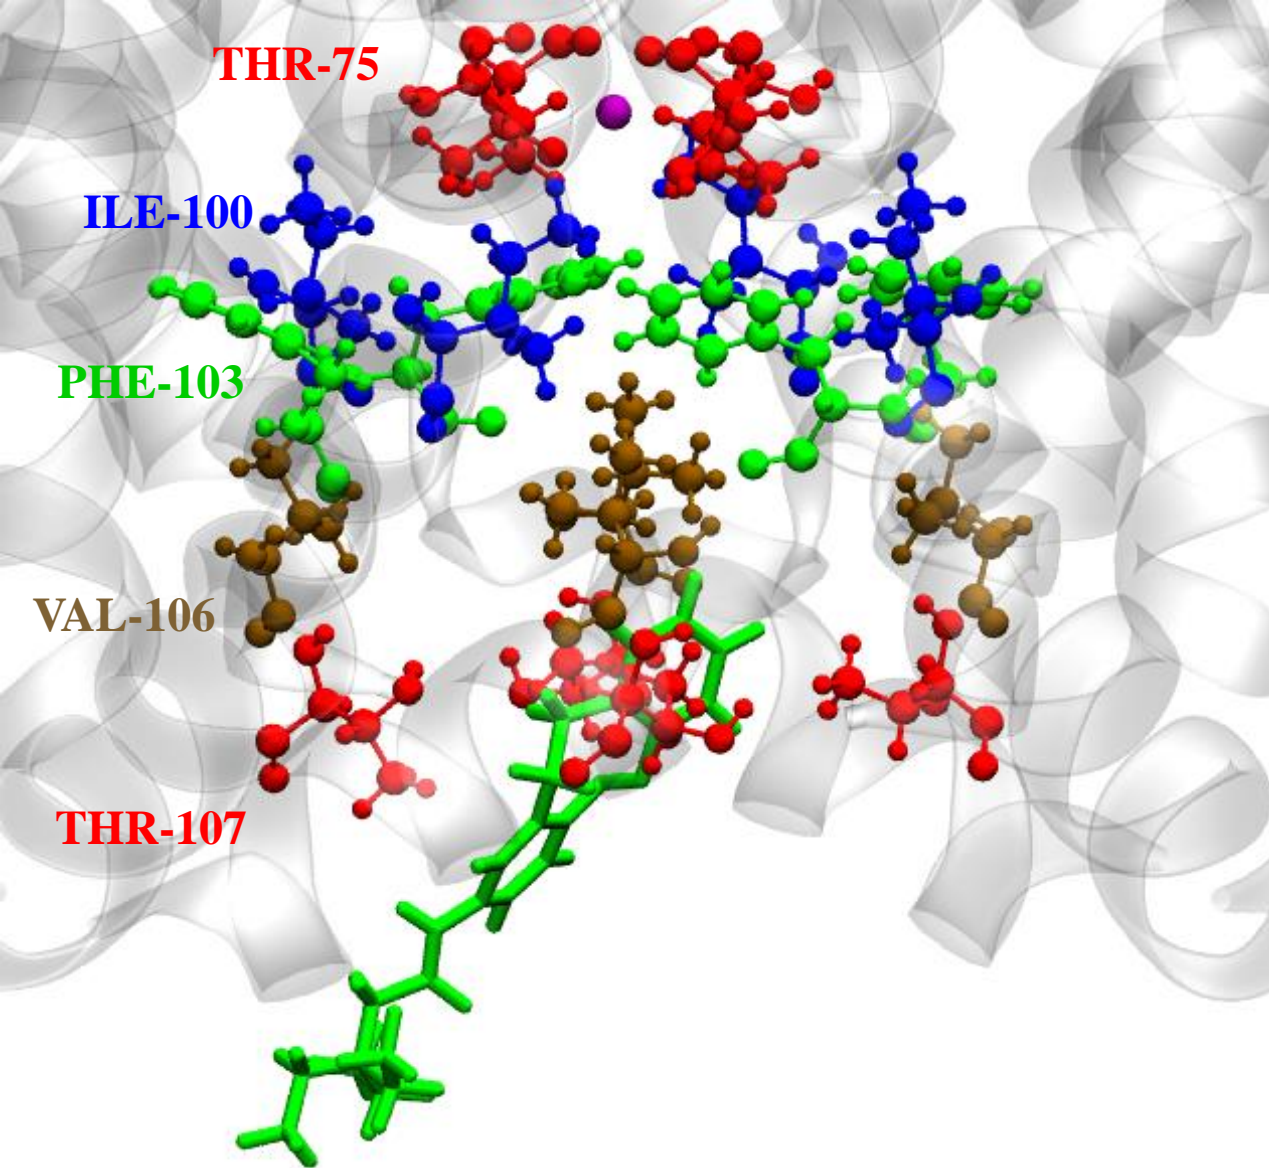

*E2 (C3)*

MM/PBSA Binding energy = -11.0 kcal/mol

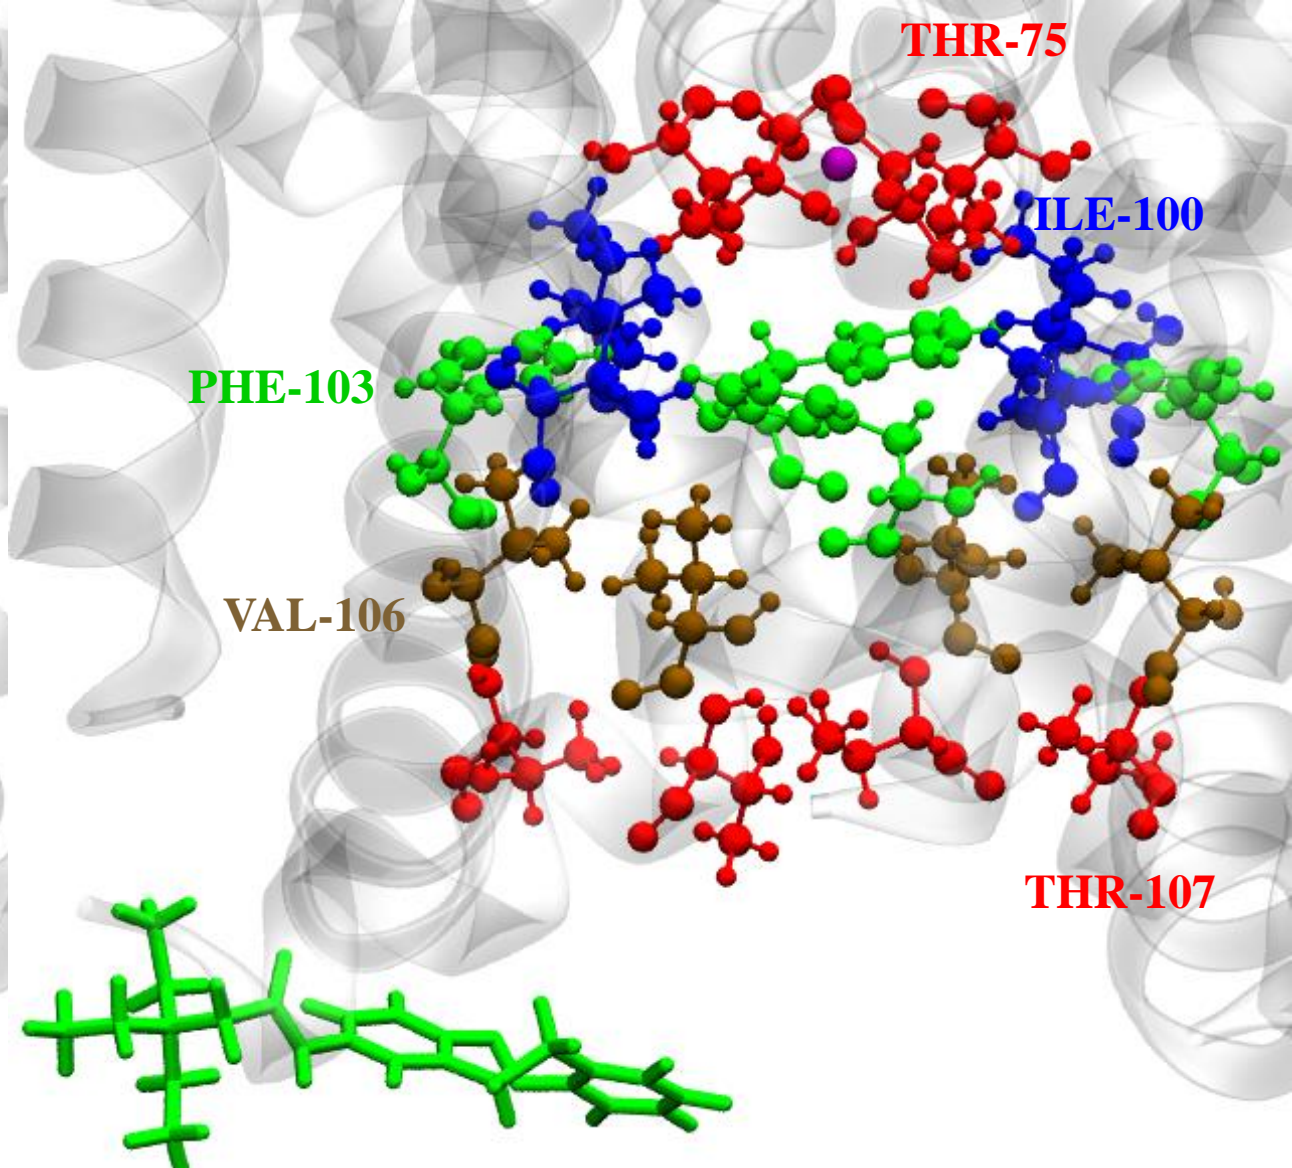

*E2 (C4)*

MM/PBSA Binding energy = -8.3 kcal/mol<sup>40</sup>



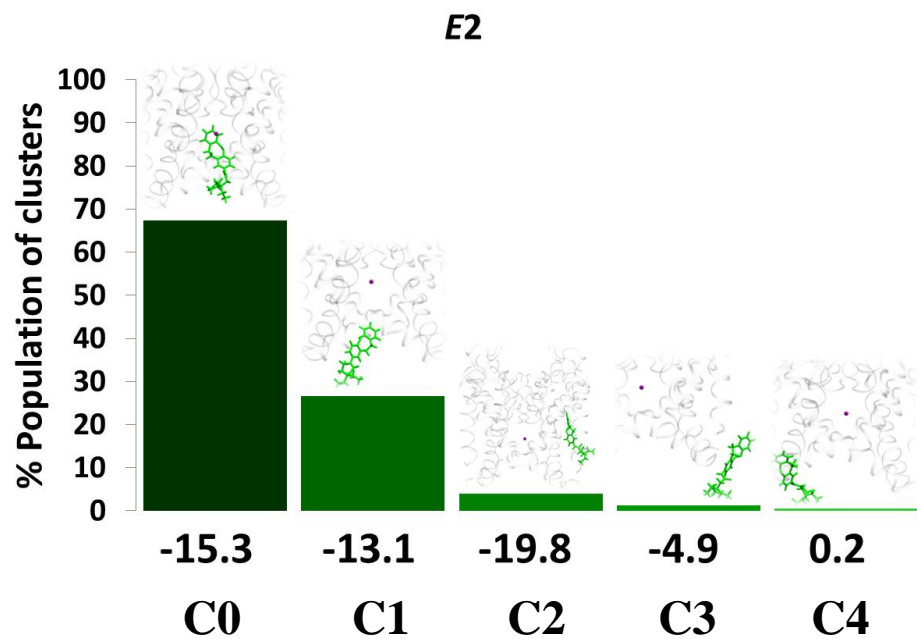

C<sub>n</sub> (n = 0 – 1) indicate different clusters. The percentage population of clusters is given on the Y-axis. Corresponding binding energy (B.E.) is given in kcal/mol on the X-axis. Protein is represented in new cartoon model with K<sup>+</sup>-ion (purple ball), and *E*-LAB-TEA is shown in stick model (green colour).

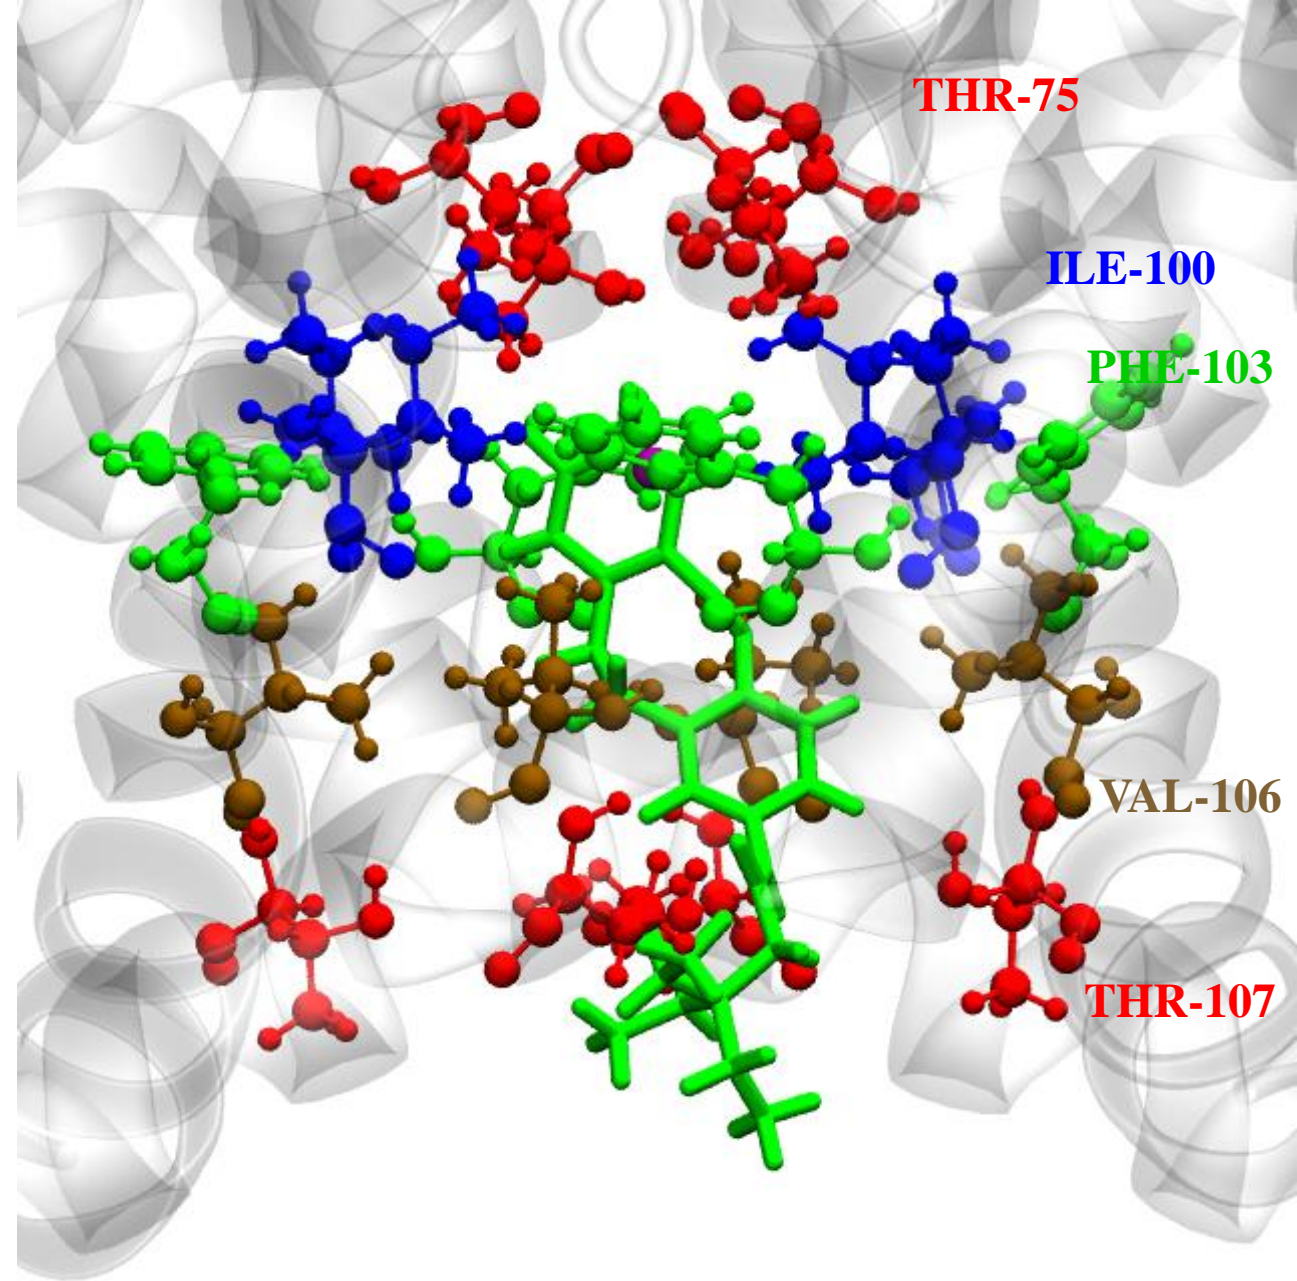

**E2 (C0)**  
**MM/PBSA Binding energy = -15.3 kcal/mol**<sup>41</sup>

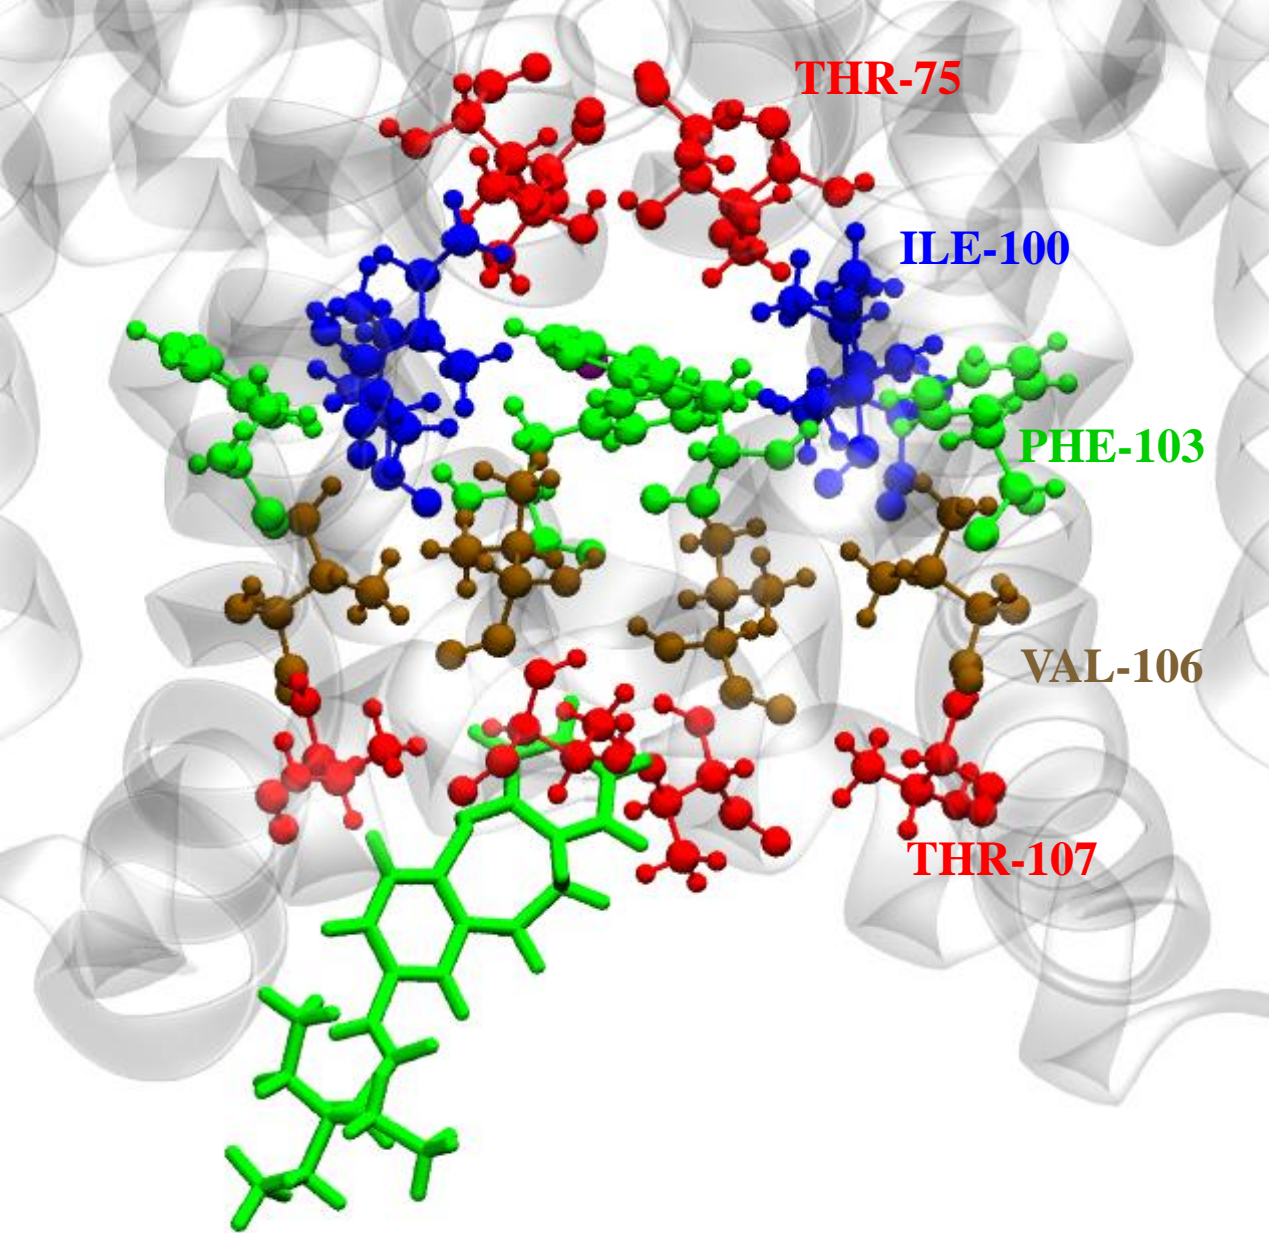

*E2 (C1)*

**MM/PBSA Binding energy = -13.1 kcal/mol**

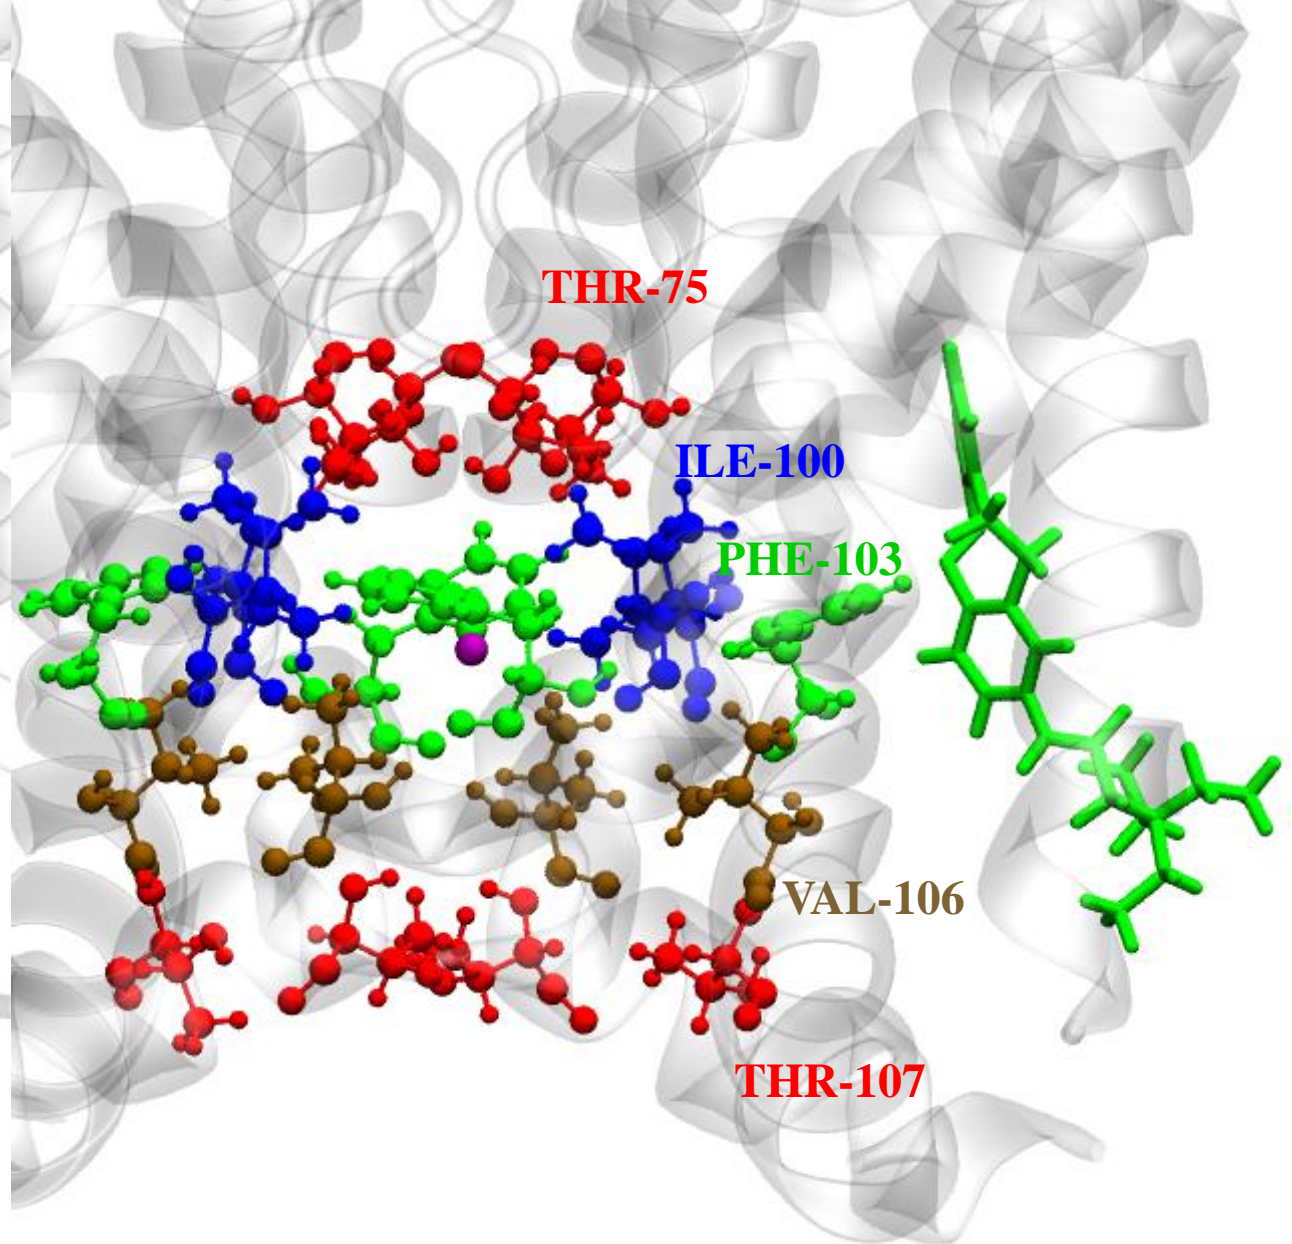

*E2 (C2)*

**MM/PBSA Binding energy = -19.8 kcal/mol<sup>42</sup>**

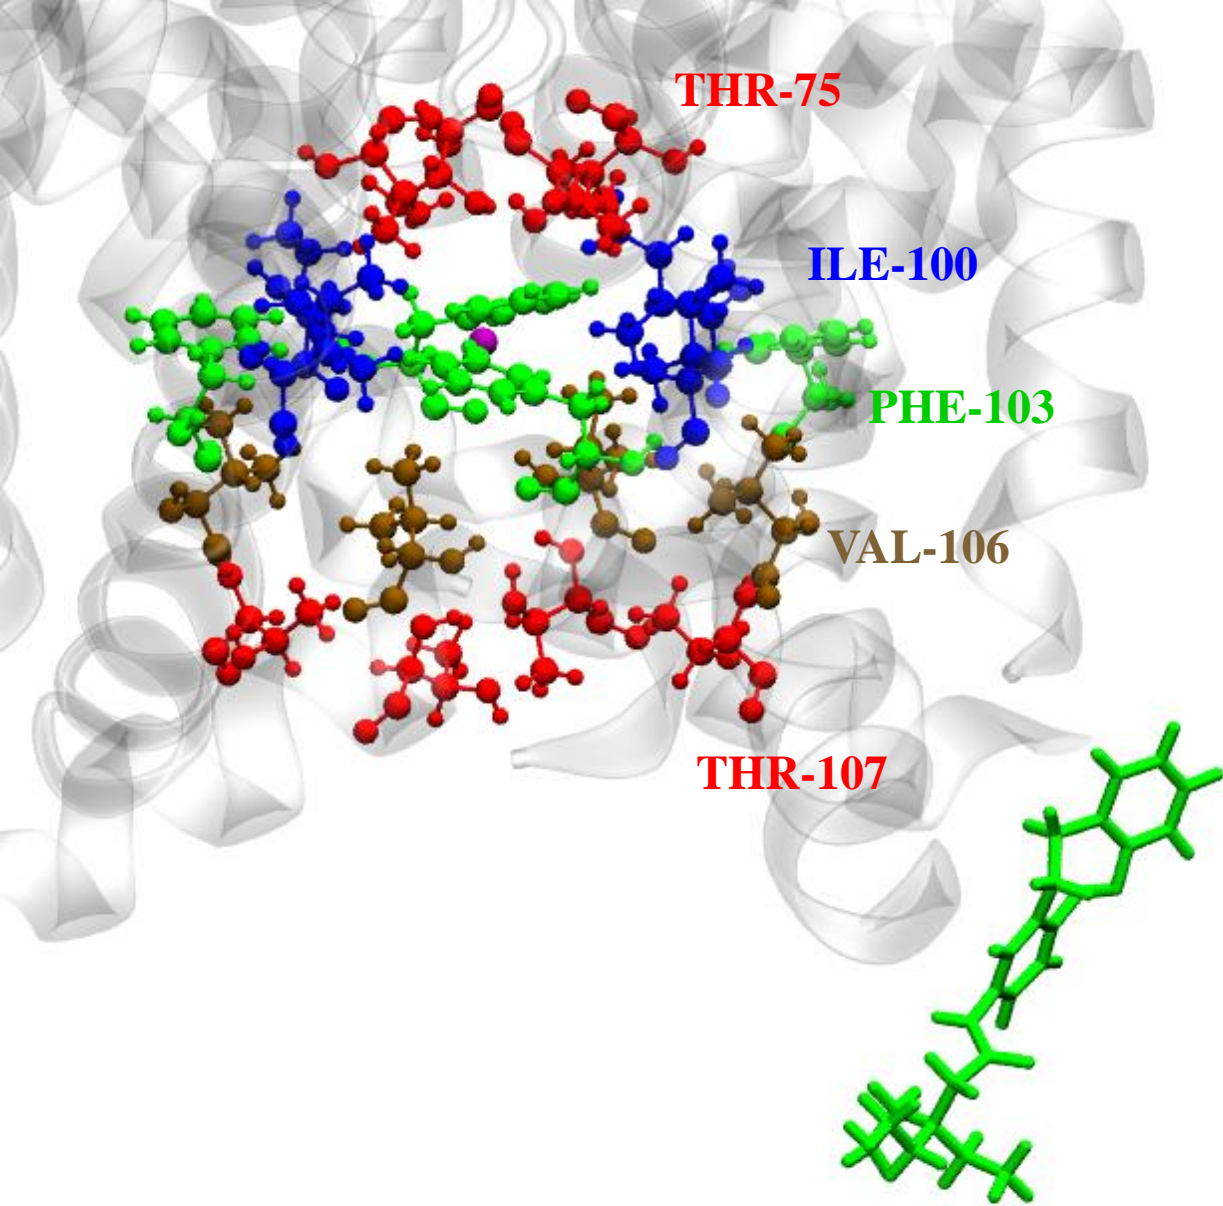

*E2 (C3)*

MM/PBSA Binding energy = -4.9 kcal/mol

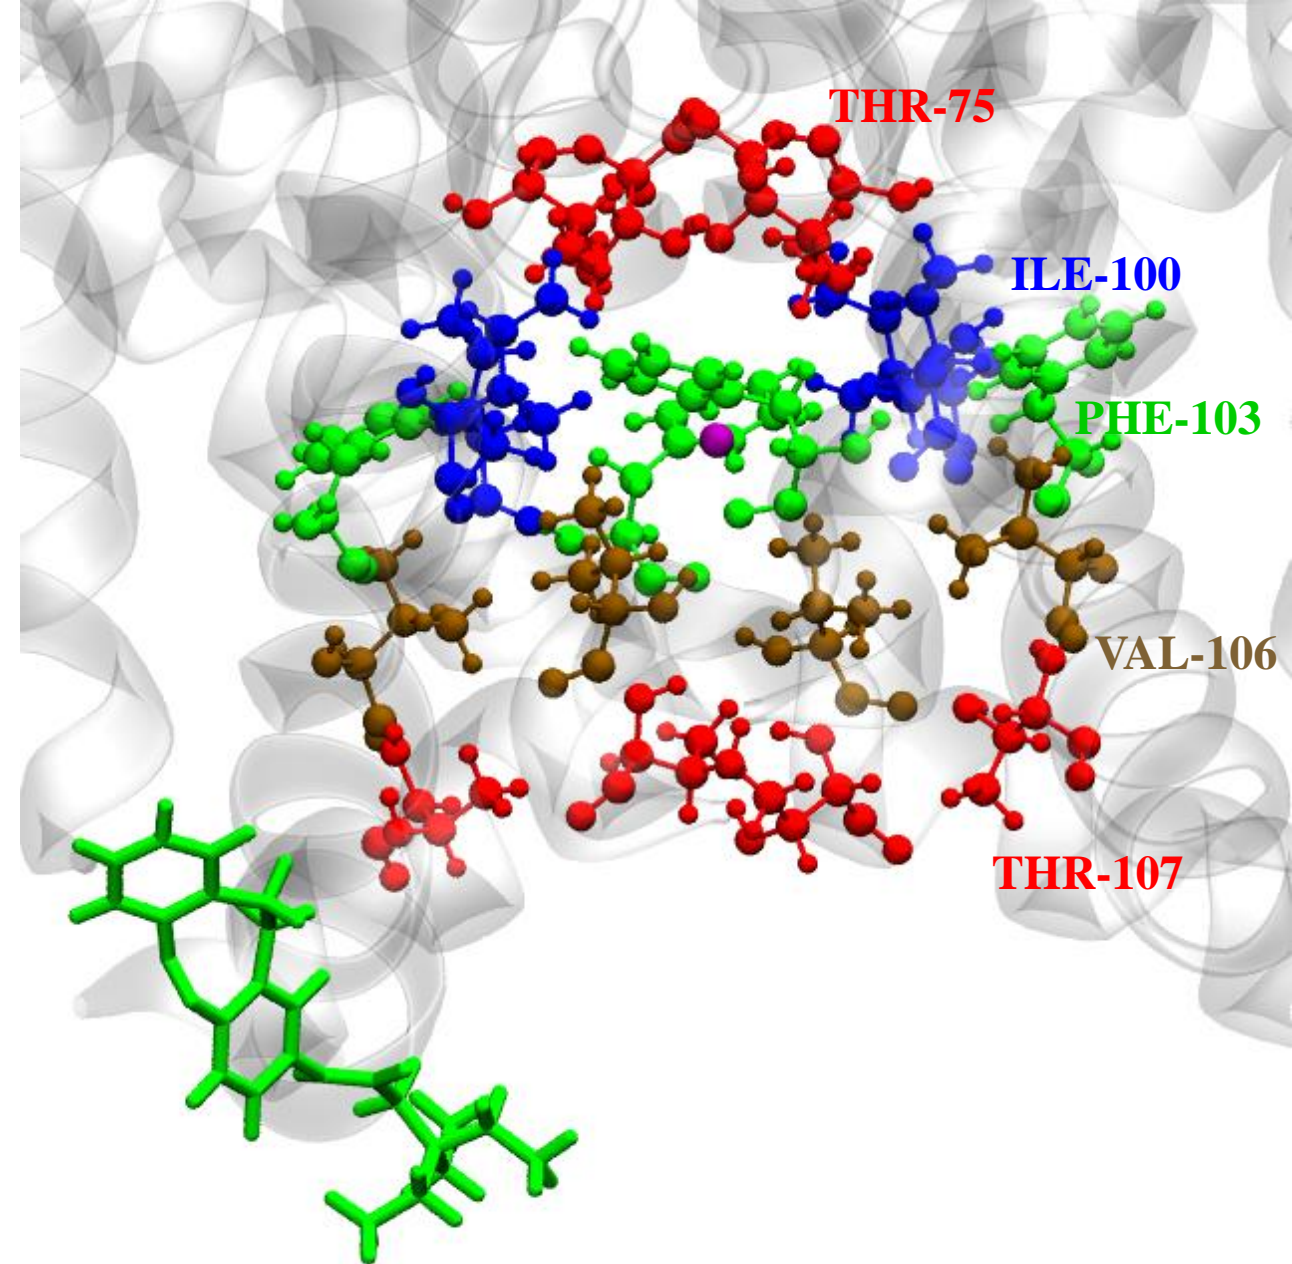

*E2 (C4)*

MM/PBSA Binding energy = 0.2 kcal/mol

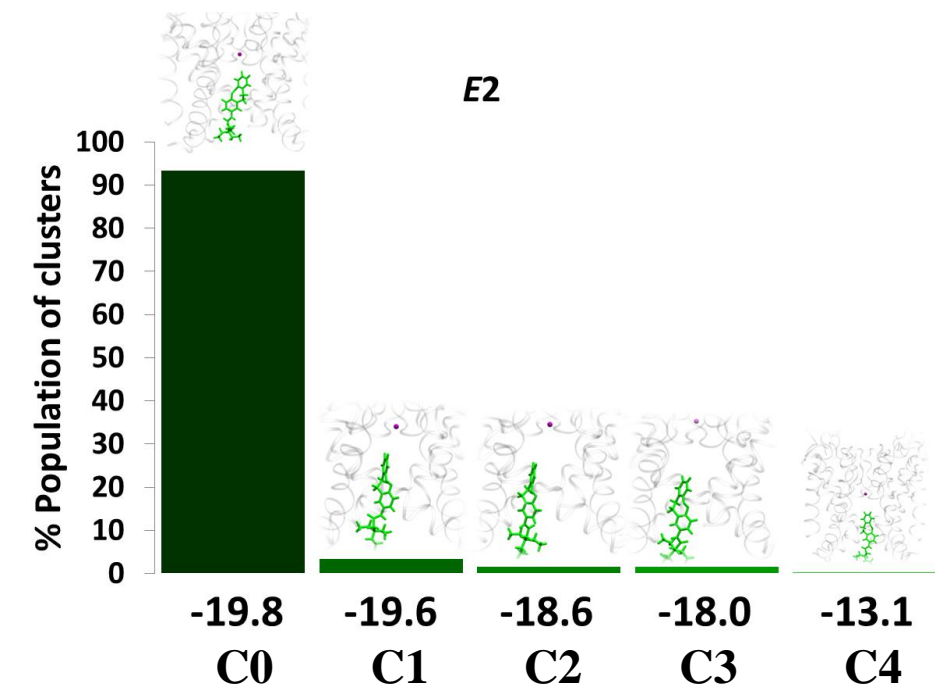

C<sub>n</sub> (n = 0 – 1) indicate different clusters. The percentage population of clusters is given on the Y-axis. Corresponding binding energy (B.E.) is given in kcal/mol on the X-axis. Protein is represented in new cartoon model with K<sup>+</sup>-ion (purple ball), and *E*-LAB-TEA is shown in stick model (green colour).

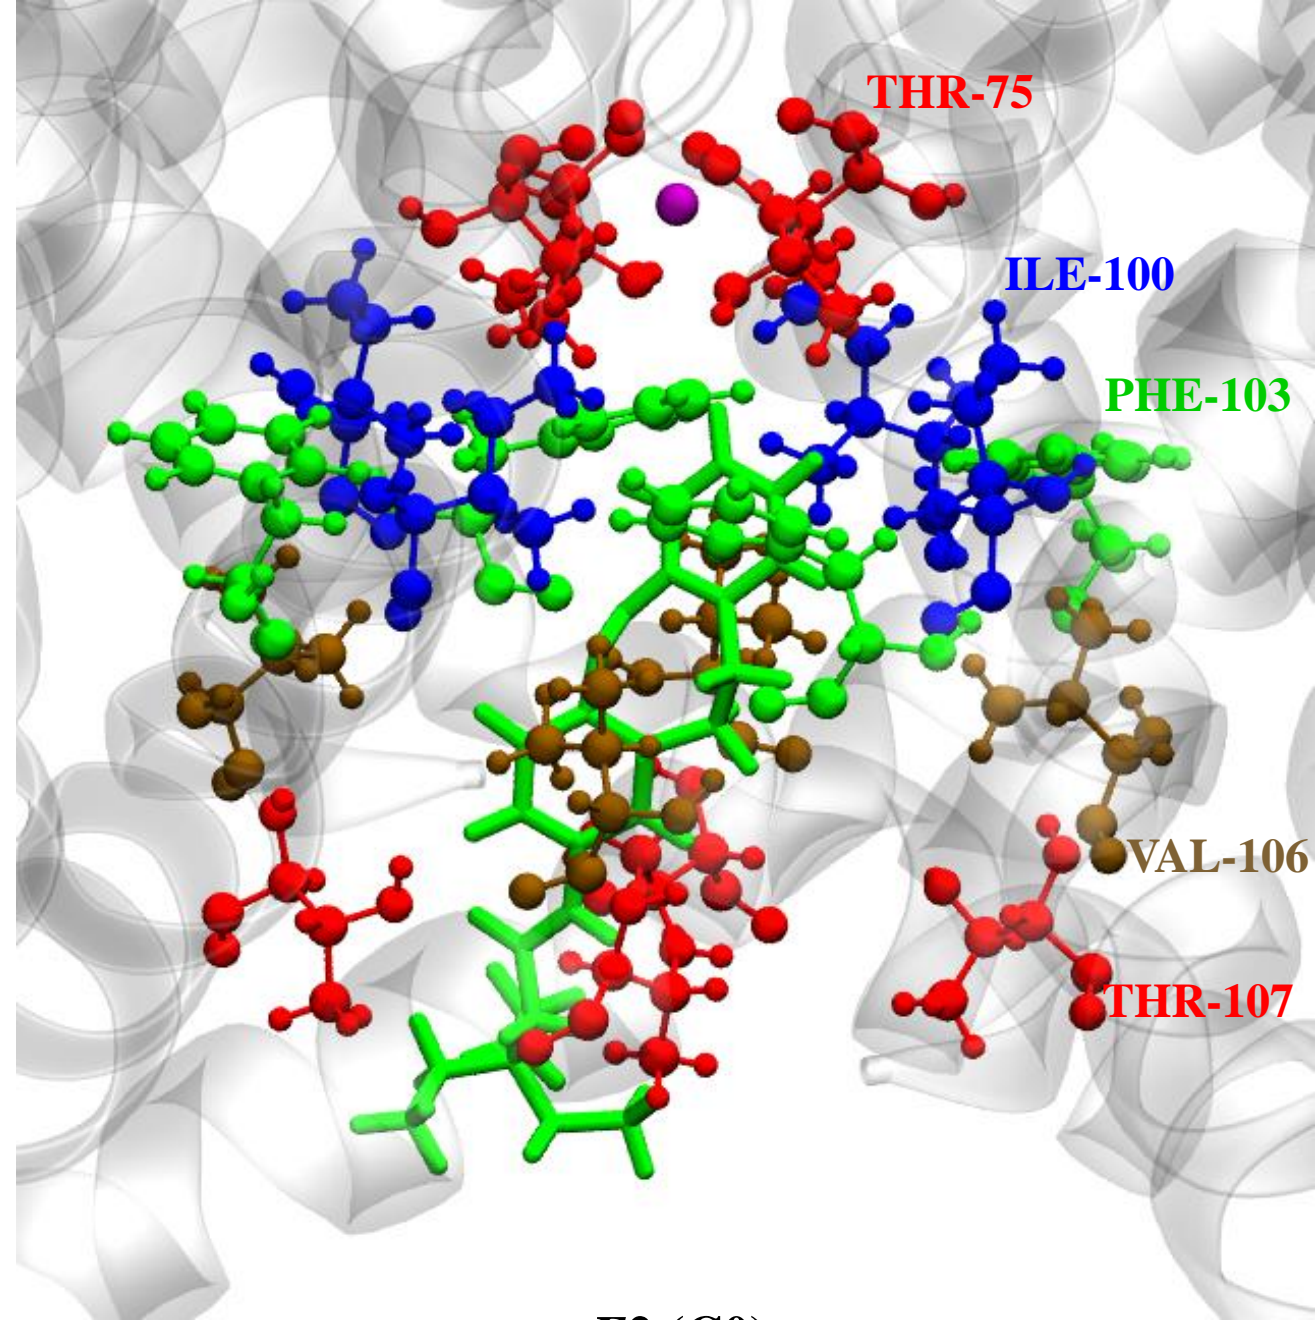

***E*2 (C0)**  
**MM/PBSA Binding energy = -19.8 kcal/mol**

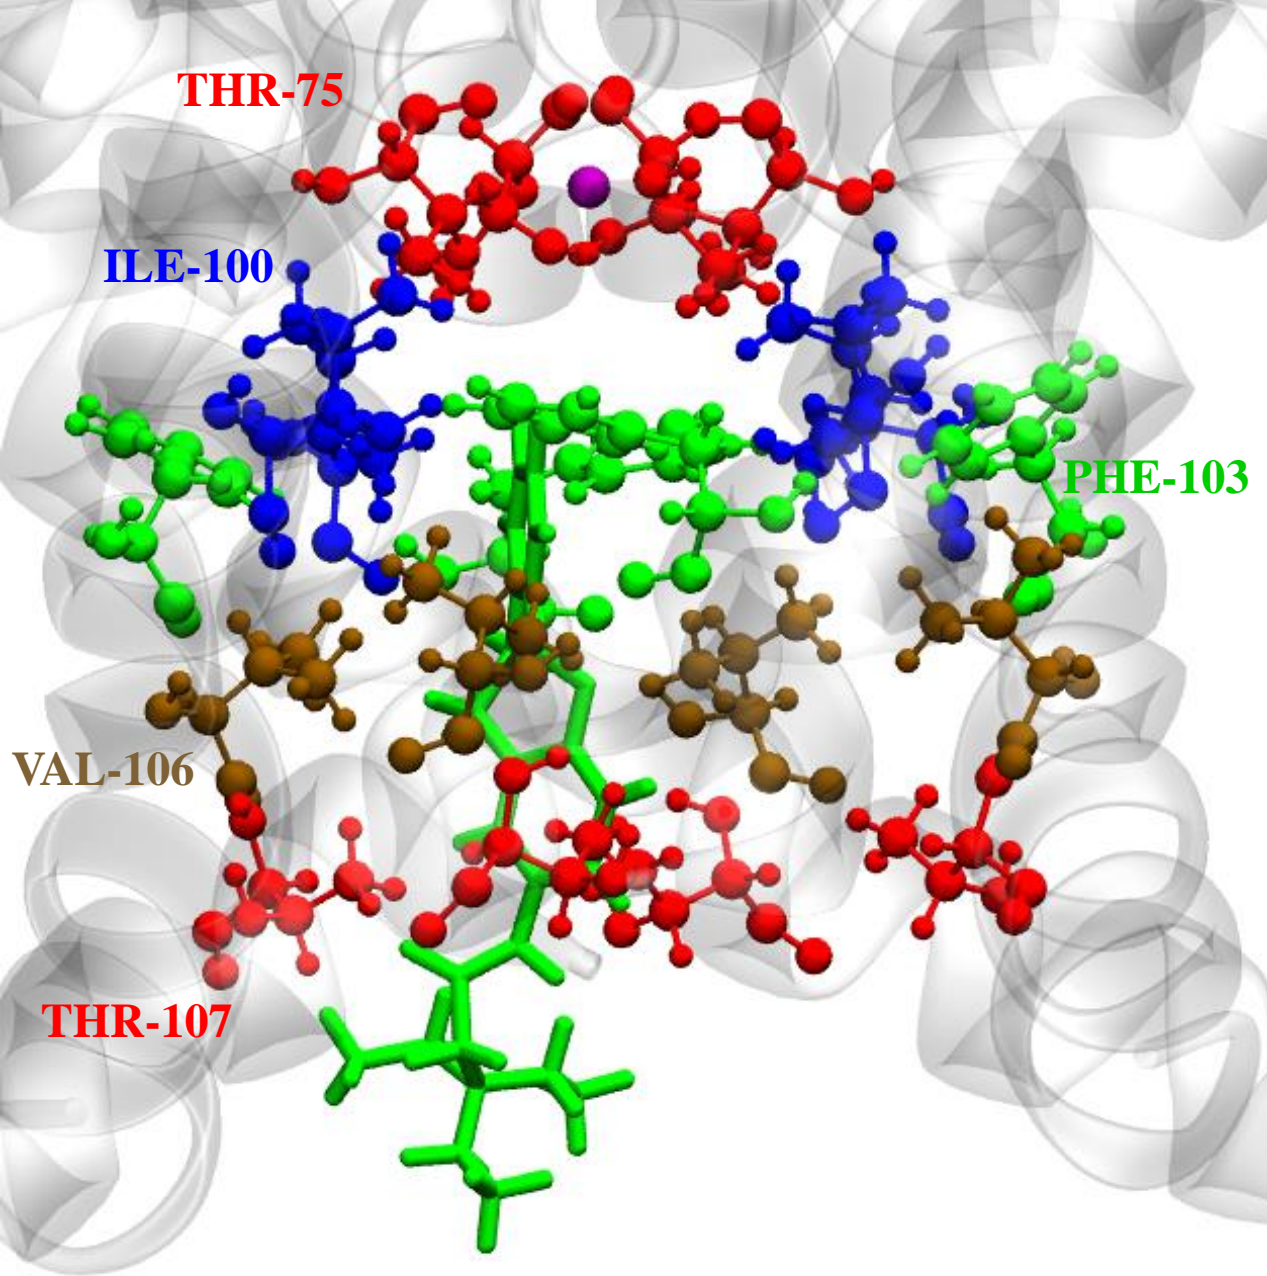

*E2 (C1)*

**MM/PBSA Binding energy = -19.6 kcal/mol**

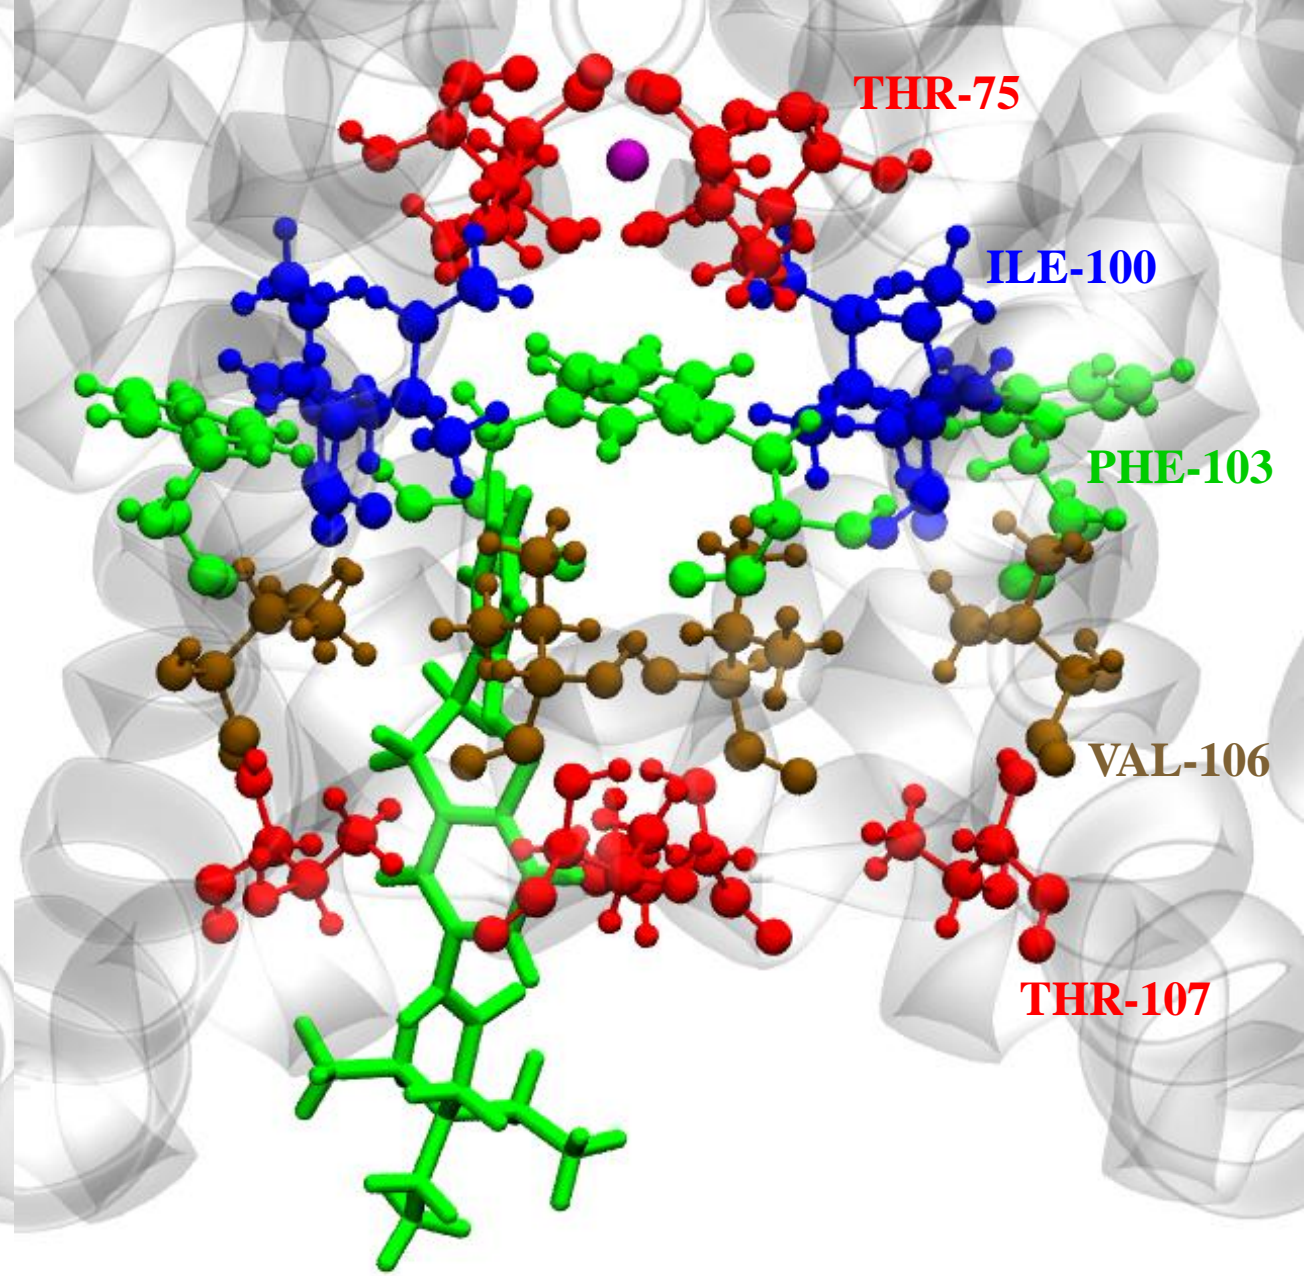

*E2 (C2)*

**MM/PBSA Binding energy = -18.6 kcal/mol**<sup>45</sup>

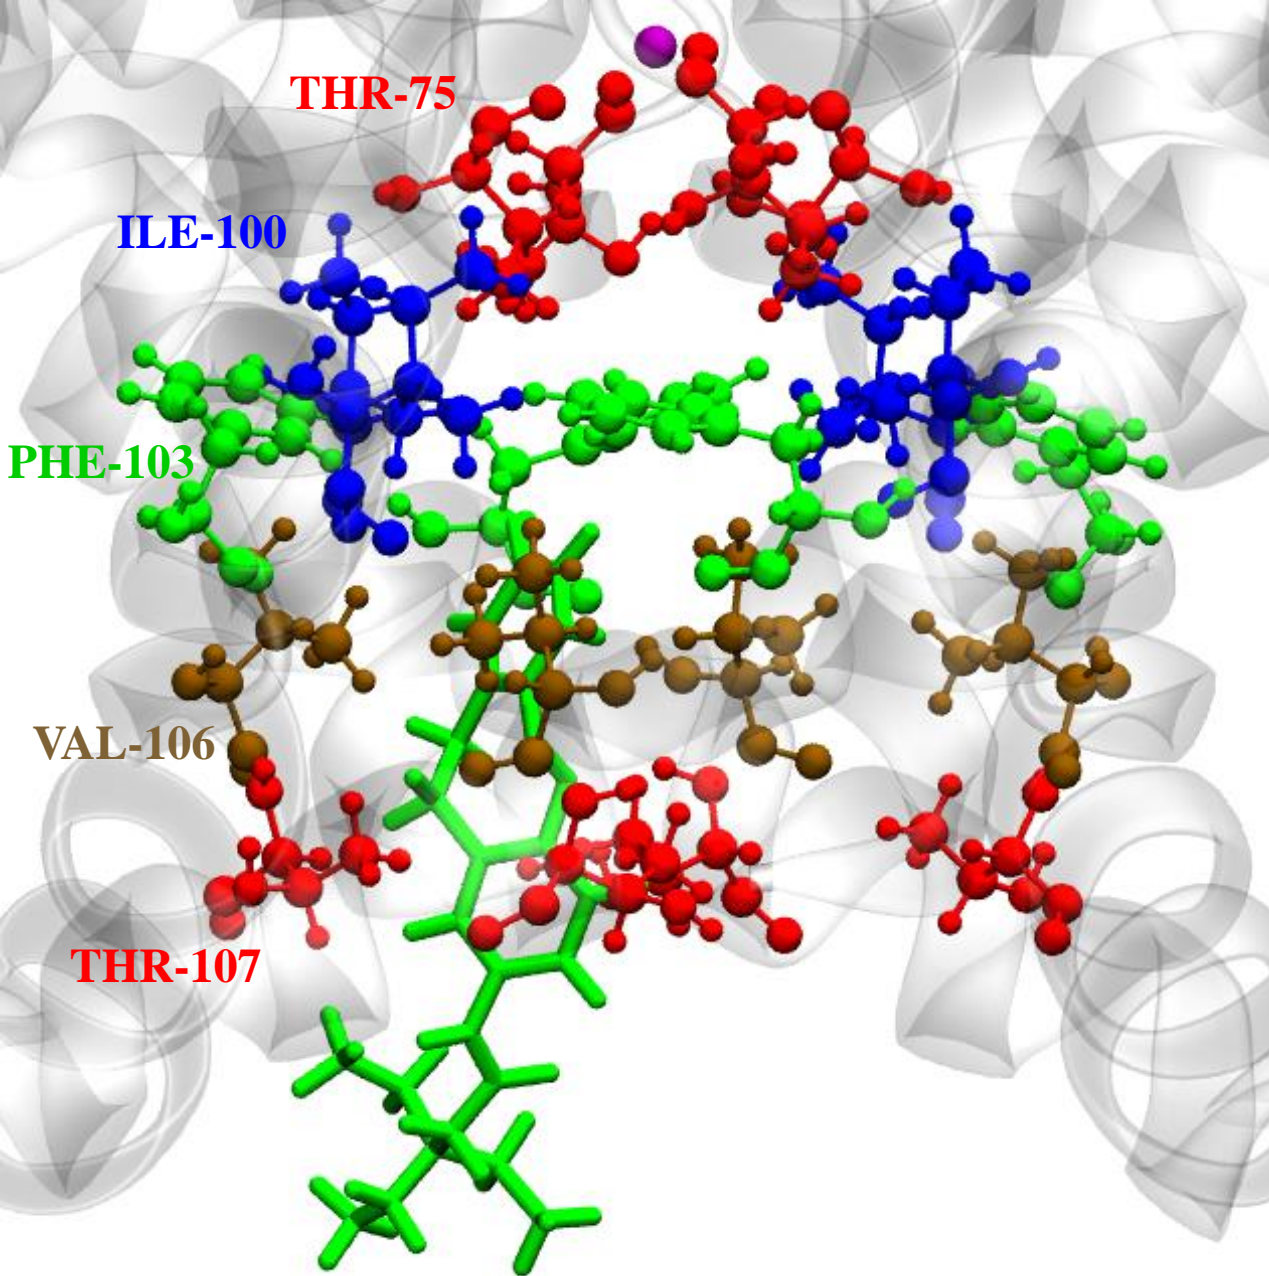

*E2 (C3)*

MM/PBSA Binding energy = -18.0 kcal/mol

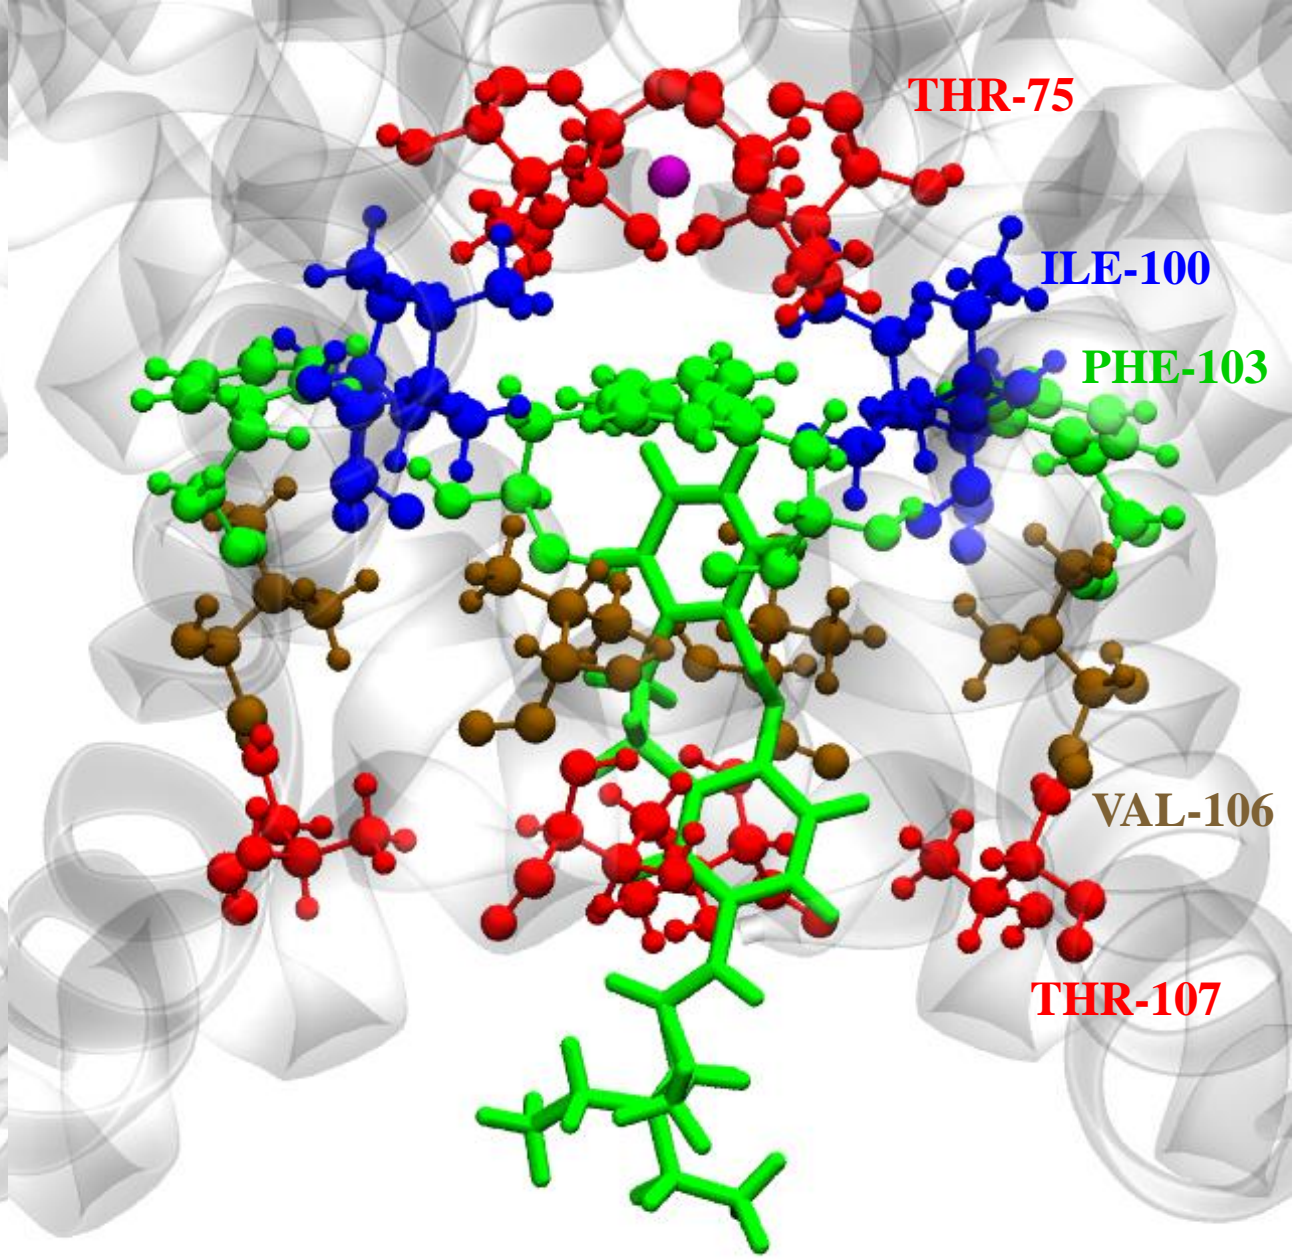

*E2 (C4)*

MM/PBSA Binding energy = -13.1 kcal/mol<sup>46</sup>
