# Supplementary material for: Deciphering the shape selective conformational equilibrium of E- and Z-locked azobenzene–tetraethylammonium ion in regulating photo-switchable K+-ion channel blocking
Source: Royal Society of Chemistry journal article supplement (doi:10.1039/d4cp01604a), 2024-01-01
Supplement: d4cp01604a7.pdf [file d4cp01604a7.pdf]

# Deciphering the Shape Selective Conformational Equilibrium of *E*- and *Z*-Locked Azobenzene-Tetraethyl Ammonium Ion in Regulating Photo-switchable $K^+$ -ion Channel Blocking

Rinsha Cholasseri<sup>a</sup> and Susmita De\*<sup>b</sup>

<sup>a</sup>Theoretical and Computational Chemistry Laboratory, Department of Chemistry, National Institute of Technology Calicut, Kozhikode, Kerala, India - 673 601.

<sup>b</sup>Department of Chemistry, University of Calicut, Calicut University P. O., Malappuram, Kerala, India - 673 635. E-mail: [susmita@uoc.ac.in](mailto:susmita@uoc.ac.in)

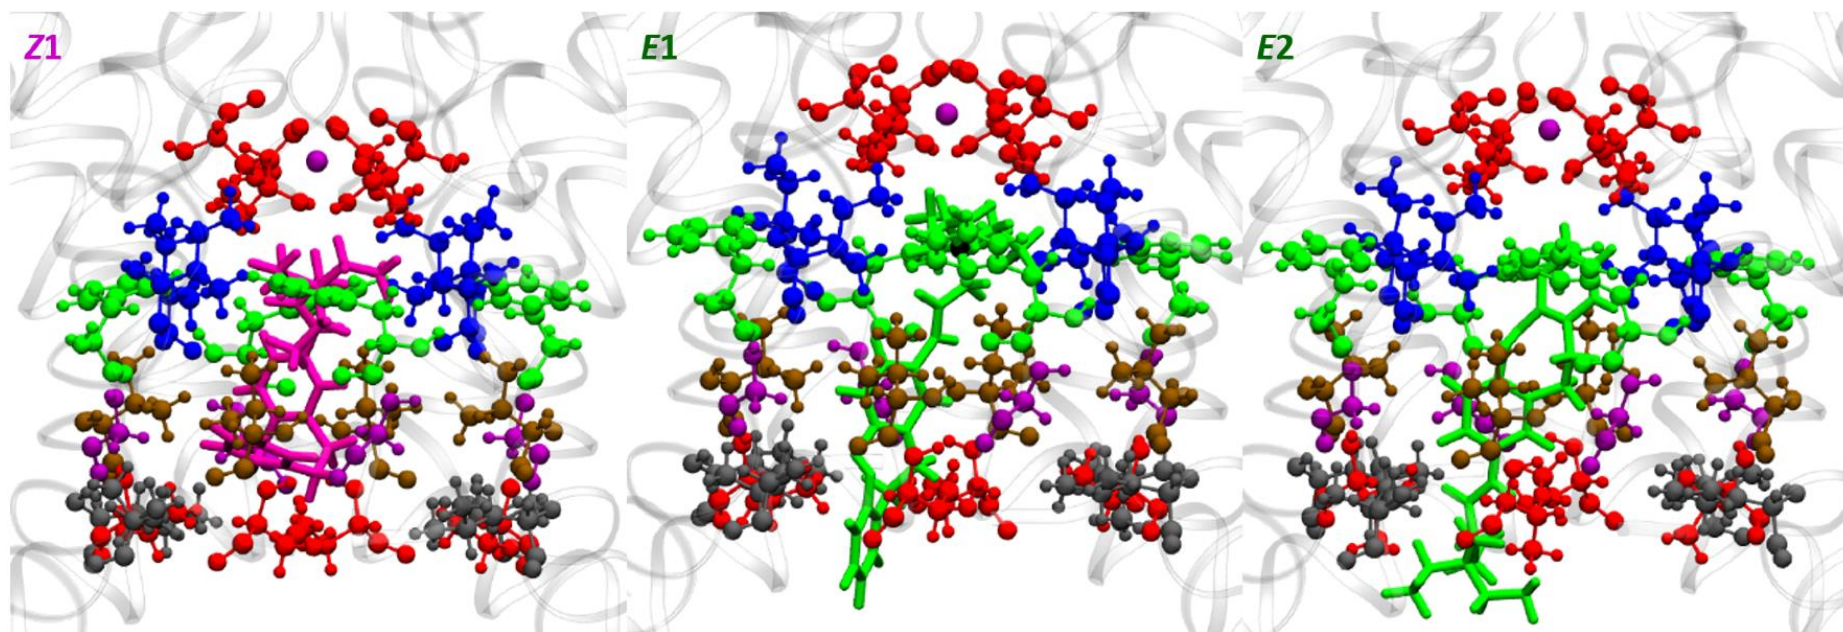

The representative structures used for SAPT0 calculation are shown. The protein and LAB-TEA are represented as the ribbon and stick (*Z*: magenta and *E*: green), respectively, and the interacting residues THR-75 (red), ILE-100 (blue), PHE-103 (green), GLY-104 (purple), VAL-106 (ochre), THR-107 (red), and LEU-110 (grey) from the extracellular to intracellular region are shown as a ball and stick model.
