# Supplementary material for: Deciphering the shape selective conformational equilibrium of E- and Z-locked azobenzene–tetraethylammonium ion in regulating photo-switchable K+-ion channel blocking
Source: Royal Society of Chemistry journal article supplement (doi:10.1039/d4cp01604a), 2024-01-01
Supplement: d4cp01604a8.pdf [file d4cp01604a8.pdf]

**Supplementary Information for**

**Deciphering the Shape Selective Conformational Equilibrium of *E*- and *Z*-  
Locked Azobenzene-Tetraethyl Ammonium Ion in Regulating Photo-  
switchable K<sup>+</sup>-ion Channel Blocking**

Rinsha Cholasseri<sup>a</sup> and Susmita De<sup>\*b</sup>

\*Corresponding Author

<sup>a</sup>Theoretical and Computational Chemistry Laboratory, Department of Chemistry, National Institute of Technology Calicut, Kozhikode, Kerala, India - 673 601.

<sup>b</sup>Department of Chemistry, University of Calicut, Calicut University P. O., Malappuram, Kerala, India - 673 635. E-mail: [susmita@uoc.ac.in](mailto:susmita@uoc.ac.in)

The Supporting Information contains,

- Supplementary Scheme Legends.
- Supplementary Figure Legends.
- Supplementary Table Legends.
- Supplementary Movie Legends
- Supplementary Scheme S1.
- Supplementary Figures S1-S35.
- Supplementary Table S1.
- Supplementary Movies S1-S5

**Supplementary Scheme Legends**

**Scheme S1.** Schematic representation of KcsA-LAB-TEA starting conformations used for the simulation without K<sup>+</sup>-ion. The open KcsA (PDB ID: 3F5W) showing only two diagonally opposite subunits, and is represented as a new cartoon. The TEA and amino-acids represented by

ball and stick model (red = threonine (THR-75 and THR-107), purple = glycine (GLY-99), blue = isoleucine (ILE-100), green = phenylalanine (PHE-103), ochre = valine (VAL-106 and VAL-115), grey = leucine (LEU-110)). The azo-nitrogens and TEA nitrogen are shown as blue in colour. The purple ball represents the potassium ion. And  $d$  represents the distance between the center of  $C_{\alpha}$  of THR-75 and nitrogen of TEA.

### Supplementary Figure Legends

**Figure S1.** Starting structures resulted after equilibration for the molecular dynamics simulation of *Z1* (*Z1a-Z1h*), *Z2* (*Z2a-Z2h*), *E1* (*E1a-E1h*) and *E2*-isomers (*E2a-E2h*) of LAB-TEA (stick model) with KcsA- $K^{+}$ -ion channel (new cartoon representation in grey colour) with one  $K^{+}$ -ion (purple ball). LAB-TEA is in the cytoplasmic region. The amino-acid residue THR-107 (red) shown in ball and stick model. Note that we have not studied the dynamics of  $Z \leftrightarrow E$  photo-isomerization inside the potassium ion channel directly. All the structures were subjected to 100 ns simulation except *Z1a*, *Z2a*, *E1a*, and *E2a* (400 ns).

**Figure S2.** Dihedral angle plot (Time (ns) vs. Dihedral angle (degree)) for *Z*-LAB-TEA when placed in the cytoplasmic region during simulation with one  $K^{+}$ -ion. The red line represents the average dihedral angle in degrees.

**Figure S3.** Dihedral angle plot (Time (ns) vs. Dihedral angle (degree)) for *E*-LAB-TEA when placed in the cytoplasmic region during simulation with one  $K^{+}$ -ion. The red line represents the average dihedral angle in degrees.

**Figure S4.** Distance plot (Time (ns) vs. Distance ( $\text{\AA}$ )) showing variation in the  $K^{+}$ - $C_{\alpha\text{THR-75}}$  distances during the simulations started with *Z1* with one  $K^{+}$ -ion. The red line represents the average value in Angstrom.

**Figure S5.** Distance plot (Time (ns) vs. Distance ( $\text{\AA}$ )) showing variation in the  $K^{+}$ - $C_{\alpha\text{THR-75}}$  distances during the simulations started with *Z2* with one  $K^{+}$ -ion. The red line represents the average value in Angstrom.

**Figure S6.** Distance plot (Time (ns) vs. Distance ( $\text{\AA}$ )) showing variation in the  $K^{+}$ - $C_{\alpha\text{THR-75}}$  distances during the simulations started with *E1* with one  $K^{+}$ -ion. The red line represents the average value in Angstrom.

**Figure S7.** Distance plot (Time (ns) vs. Distance ( $\text{\AA}$ )) showing variation in the  $K^{+}$ - $C_{\alpha\text{THR-75}}$  distances during the simulations started with *E2* with one  $K^{+}$ -ion. The red line represents the average value in Angstrom.

**Figure S8.** Distance plot (Time (ns) vs. Distance ( $\text{\AA}$ )) showing variation in the  ${}_{\text{TEA}}N$ - $C_{\alpha\text{THR-75}}$  distances during the simulations started with *Z1* with one  $K^{+}$ -ion. The red line represents the average value in Angstrom. The starting position and the preferable position of LAB-TEA during the simulation are shown in left and right insets, respectively.

**Figure S9.** Distance plot (Time (ns) vs. Distance ( $\text{\AA}$ )) showing variation in the  ${}_{\text{TEA}}N$ - $C_{\alpha\text{THR-75}}$  distances during the simulations started with *Z2* with one  $K^{+}$ -ion. The red line represents the average value in Angstrom. The starting position and the preferable position of LAB-TEA during the simulation shown in left and right insets, respectively.

**Figure S10.** Distance plot (Time (ns) vs. Distance (Å)) showing variation in the  $_{TEA}N-C_{\alpha}THR-75$  distances during the simulations started with *E1* with one  $K^+$ -ion. The red line represents the average value in Angstrom. The starting position and the preferable position of LAB-TEA during the simulation are shown in left and right insets, respectively.

**Figure S11.** Distance plot (Time (ns) vs. Distance (Å)) showing variation in the  $_{TEA}N-C_{\alpha}THR-75$  distances during the simulations started with *E2* with one  $K^+$ -ion. The red line represents the average value in Angstrom. The starting position and the preferable position of LAB-TEA during the simulation are shown in left and right insets, respectively.

**Figure S12.** Summary of hierarchical average-linkage clustering performed on trajectories of Z-LAB-TEA with one  $K^+$ -ion (purple ball) showing binding of Z-isomer into the channel cavity, when LAB-TEA placed in the cytoplasmic region. Z1a and Z1h are the starting structures resulting in Z1 and Z2 binding conformations respectively. The average structure of each cluster is shown, indicating location of LAB-TEA relative to the ion channel. Cn (n = 0 – 4) indicates different clusters. Percentage occurrence of each cluster is given in parenthesis. Corresponding binding energy (B.E.) is given in kcal/mol. Protein is represented as new cartoon in the starting structure and as lines in the average structures. LAB-TEA is shown as a stick model.

**Figure S13.** Root-mean-square deviation plot (Time (ns) vs. RMSD (Å)) for Z-LAB-TEA with one  $K^+$ -ion resulting in the entry of Z-isomer to the channel cavity, when LAB-TEA placed in the cytoplasmic region. Z1a and Z1h are the starting structure for that particular trajectory resulting in Z1 and Z2 respectively. Black, red, and green graphs show RMSD of KcsA with Z-LAB-TEA, KcsA alone, and Z-LAB-TEA alone respectively.

**Figure S14.** Contact plot per residue for the most probable cluster trajectories (Cn with percentage > 10) of KcsA–Z-LAB-TEA with  $K^+$ -ion resulting in Z1 and Z2 conformations, when LAB-TEA placed in the cytoplasmic region. Binding energy in kcal/mol is given in parenthesis. The SF, CC, and CG represent selectivity filter, channel cavity, and channel gate residues respectively.

**Figure S15.** Interaction of Z2 conformation with individual channel residues in the most probable conformation (C0), of the trajectory resulting in Z-entry to the KcsA channel cavity, when simulation performed with one  $K^+$ -ion (purple ball model) inside the channel and Z-LAB-QA in the cytoplasmic region. The protein and Z2 represented as ribbon and stick (magenta) respectively, and the interacting residues THR-75 (red), ILE-100 (blue), PHE-103 (green), GLY- 104 (purple), and THR-107 (red) from extracellular to intracellular region in ball and stick model. The distances are given in Angstrom. Residue numbers are given in the upper left corner of each box.

**Figure S16.** Summary of hierarchical average-linkage clustering performed on trajectories of E-LAB-TEA with one  $K^+$ -ion (purple ball) showing entry of E-isomer into the channel cavity, when LAB-TEA placed in the cytoplasmic region, and resulting in *E1* conformation. Structures E1a to E1h are the starting structure for that particular trajectory. The average structure of each cluster is shown, indicating location of LAB-TEA relative to the ion channel. Cn (n = 0 – 4) indicates different clusters. Percentage occurrence of each cluster is given in parenthesis. Corresponding binding energy (B.E.) is given in kcal/mol. Protein is represented as new cartoon in the starting structure and as lines in the average structures. LAB-TEA is shown as a stick model.

**Figure S17.** Summary of hierarchical average-linkage clustering performed on trajectories of *E*-LAB-TEA with one  $K^+$ -ion (purple ball) showing entry of *E*-isomer into the channel cavity, when LAB-TEA placed in the cytoplasmic region, resulting in *E2* conformation. *E1c* to *E2h* are the starting structure for that particular trajectory. The average structure of each cluster is shown, indicating the location of LAB-TEA relative to the ion channel. Cn ( $n = 0 - 4$ ) indicates different clusters. Percentage occurrence of each cluster is given in parenthesis. Corresponding binding energy (B.E.) is given in kcal/mol. Protein is represented as new cartoon in the starting structure and as lines in the average structures. LAB-TEA is shown as a stick model.

**Figure S18.** Root-mean-square deviation plot (Time (ns) vs. RMSD ( $\text{\AA}$ )) for *E*-LAB-TEA with one  $K^+$ -ion resulting entry of *E*-isomer to the channel cavity, when LAB-TEA placed in the cytoplasmic region. *E1a* to *E2h* are the starting structure for that particular trajectory. Black, red, and green graphs show RMSD of KcsA with *E*-LAB-TEA, KcsA alone, and *E*-LAB-TEA alone respectively. The red line represents the average value in Angstrom.

**Figure S19.** Contact plot per residue for the most probable cluster trajectories (Cn with percentage  $> 10$ ) of KcsA-*E*-LAB-TEA with  $K^+$ -ion resulting in *E1* (*E1a*, *E1b*, *E1d*, *E1f*, *E1g*, and *E1h*) conformation, when LAB-TEA placed in the cytoplasmic region. Binding energy in kcal/mol is given in parenthesis. The SF, CC, and CG represent selectivity filter, channel cavity, and channel gate residues respectively.

**Figure S20.** Contact plot per residue for the most probable cluster trajectories (Cn with percentage  $> 10$ ) of KcsA-*E*-LAB-TEA with  $K^+$ -ion resulting in *E2* conformation, when LAB-TEA placed in the cytoplasmic region. Binding energy in kcal/mol is given in parenthesis. The SF, CC, and CG represent selectivity filter, channel cavity, and channel gate residues respectively.

**Figure S21.** Starting structures for the molecular dynamics simulation of *Z*- and *E*-isomers of LAB-TEA (stick model) with KcsA- $K^+$ -ion channel (new cartoon representation in grey colour) in the absence of  $K^+$ -ion. The LAB-TEA is inside the channel. The amino-acid residue THR-107 (red) shown in ball and stick model.

**Figure S22.** Dihedral angle plot (Time (ns) vs. Dihedral angle (degree)) for *Z*-LAB-TEA when placed inside the channel during simulation without  $K^+$ -ion. *Z1a* to *Z2e* represent the starting structure for that particular trajectory. The red line represents the average dihedral angle in degrees.

**Figure S23.** Dihedral angle plot (Time (ns) vs. Dihedral angle (degree)) for *E*-LAB-TEA when placed inside the channel during simulation without  $K^+$ -ion. *E1a* to *E2e* represent the starting structure for that particular trajectory. The red line represents the average dihedral angle in degrees.

**Figure S24.** Summary of hierarchical average-linkage clustering performed on trajectories of *Z*-LAB-TEA without  $K^+$ -ion, when LAB-TEA placed inside the channel cavity. *Z1a* to *Z1e* are the starting structure for that particular trajectory. The average structure of each cluster is shown, indicating location of LAB-TEA relative to the ion channel. Cn ( $n = 0 - 4$ ) indicates different clusters. Percentage occurrence of each cluster is given in parenthesis. Corresponding binding energy (B.E.) is given in kcal/mol. Protein is represented as new cartoon in the starting structure and as lines in the average structures. LAB-TEA is shown as a stick model. All the simulations retained the *Z1* binding poses as that in the starting structure.

**Figure S25.** Contact plot per residue for the most probable cluster trajectories (Cn with percentage > 10) of KcsA–Z-LAB-QA without K<sup>+</sup>-ion resulting in Z1 conformation, when LAB-TEA placed inside the channel cavity. Binding energy in kcal/mol is given in parenthesis. The SF, CC, and CG represent selectivity filter, channel cavity, and channel gate residues respectively.

**Figure S26.** Summary of hierarchical average-linkage clustering performed on trajectories of Z-LAB-TEA without K<sup>+</sup>-ion, when LAB-TEA placed inside the channel cavity in Z2 conformation. Z2a to Z2e are the starting structure for that particular trajectory. The average structure of each cluster is shown, indicating location of LAB-TEA relative to the ion channel. Cn (n = 0 – 4) indicates different clusters. Percentage occurrence of each cluster is given in parenthesis. Corresponding binding energy (B.E.) is given in kcal/mol. Protein is represented as new cartoon in the starting structure and as lines in the average structures. LAB-TEA is shown as a stick model. All the simulations result in Z2 to Z1 conversion. The clusters showing Z2 conformation is highlighted in red (9.6 - 11.3%).

**Figure S27.** Contact plot per residue for the most probable cluster trajectories (Cn with percentage > 10) of KcsA–Z-LAB-TEA without K<sup>+</sup>-ion resulting in Z1 and Z2 conformations, when LAB-TEA placed inside the channel cavity in Z2 conformation. Binding energy in kcal/mol is given in parenthesis. The SF, CC, and CG represent selectivity filter, channel cavity, and channel gate residues respectively.

**Figure S28.** Interaction of Z1 conformation with individual channel residues in the most probable conformation (C0), of the trajectory resulting in Z1, when simulation performed with Z-LAB-QA inside the channel cavity, without K<sup>+</sup>-ion. The protein and Z1 represented as ribbon and stick (magenta) respectively, and the interacting residues THR-75 (red), ILE-100 (blue), PHE-103 (green), VAL-106 (ochre), and THR-107 (red) from extracellular to intracellular region in ball and stick model. The distances are given in Angstrom. Residue numbers are given in the upper left corner of each box.

**Figure S29.** Summary of hierarchical average-linkage clustering performed on trajectories of E-LAB-TEA without K<sup>+</sup>-ion, when LAB-TEA placed inside the channel cavity. Ea to Ec are the starting structure for that particular trajectory. The average structure of each cluster is shown, indicating location of LAB-TEA relative to the ion channel. Cn (n = 0 – 4) indicates different clusters. Percentage occurrence of each cluster is given in parenthesis. Corresponding binding energy (B.E.) is given in kcal/mol. Protein is represented as new cartoon in the starting structure and as lines in the average structures. LAB-TEA is shown as a stick model. All the simulations retained the E1 binding poses as that in the starting structure.

**Figure S30.** Contact plot per residue for the most probable cluster trajectories (Cn with percentage > 10) of KcsA–E-LAB-TEA without K<sup>+</sup>-ion resulting in E1 conformation, when LAB-TEA placed inside the channel cavity in E1 conformation. Binding energy in kcal/mol is given in parenthesis. The SF, CC, and CG represent selectivity filter, channel cavity, and channel gate residues respectively.

**Figure S31.** Summary of hierarchical average-linkage clustering performed on trajectories of E-LAB-TEA without K<sup>+</sup>-ion, when LAB-TEA placed inside the channel cavity. E2a to E2e are the starting structure for that particular trajectory. The average structure of each cluster is shown, indicating location of LAB-TEA relative to the ion channel. Cn (n = 0–4) indicates different

clusters. Percentage occurrence of each cluster is given in parenthesis. Corresponding binding energy (B.E.) is given in kcal/mol. Protein is represented as new cartoon in the starting structure and as lines in the average structures. LAB-TEA is shown as a stick model. All the simulations retained the *E2* binding poses as that in the starting structure.

**Figure S32.** Contact plot per residue for the most probable cluster trajectories (C<sub>n</sub> with percentage > 10) of KcsA–*E*-LAB-TEA without K<sup>+</sup>-ion resulting in *E2* conformation, when LAB-TEA placed inside the channel cavity in *E2* conformation. Binding energy in kcal/mol is given in parenthesis. The SF, CC, and CG represent selectivity filter, channel cavity, and channel gate residues respectively.

**Figure S33.** Interaction of (a) *E1* and (b) *E2* conformation with individual channel residues in the most probable conformation (C<sub>0</sub>), when simulation performed with *E*-LAB-TEA inside the channel cavity, without K<sup>+</sup>-ion. The protein and *E*-LAB-TEA are represented as ribbon and stick (green) respectively, and the interacting residues THR-75 (red), ILE-100 (blue), PHE-103 (green), GLY-104 (purple), VAL-106 (ochre), THR-107 (red), and LEU-110 (grey) from extracellular to the intracellular region in the ball and stick model. The distances are given in Angstrom. Residue numbers are given in the upper left corner of each box.

**Figure S34.** The structure of a) *E1*, b) *E2*, and c) *Z1* corresponds to the first energy barrier in Figure 10, where *E1* (dark green), *E2* (green), and *Z1* (magenta) encounter the channel gate residues for the first time during their transition from the intracellular region. The KcsA channel is shown in ribbon and K<sup>+</sup>-ion is shown as the purple ball.

**Figure S35.** The structure of a) *Z1* corresponds to the energy ‘dip’ in the PMF plot, Figure 10. b) Possible interactions of LAB moiety of *Z1* with the channel gate residues. The KcsA channel is shown in ribbon and K<sup>+</sup>-ion is shown as the purple ball.

### Supplementary Table Legend

**Table S1.** The calculated binding energy ( $\Delta H$ ) and entropy contribution ( $T\Delta S$ ) using the molecular mechanics Poisson Boltzmann surface area (MMPBSA) and the Kongsted Ryde entropy methods respectively are given.

### Supplementary Movie Legends

**Movie S1.** The trajectory of *Z*-LAB-TEA (licorice; cyan = carbon, blue = nitrogen, red = oxygen, and white = hydrogens) with KcsA channel (new cartoon model) in presence of K<sup>+</sup>-ion (purple ball) showing that the curved nature of the LAB restricts *Z*-LAB-TEA movement into the CC. The residues THR-75 and THR-107 are shown in ball and stick model (red). This trajectory is part of 400 ns simulation on *Z1a* given in Figure S1.

**Movie S2.** The trajectory of *Z*-LAB-TEA (licorice; cyan = carbon, blue = nitrogen, red = oxygen, and white = hydrogens) with KcsA channel (new cartoon model) without K<sup>+</sup>-ion showing the re-orientation of *Z2* inside the cavity to *Z1* during the 400 ns simulation on *Z2a* given in Figure S26. The residues THR-75 and THR-107 are shown in ball and stick model (red).

**Movie S3.** Trajectory showing  $E2 \rightarrow E1 \rightarrow E2$  rotation of *E-LAB-TEA* (licorice; cyan = carbon, blue = nitrogen, red = oxygen, and white = hydrogens) outside the channel cavity (new cartoon model). The *E2* exit the cavity and then enters as *E1*, again come out of the cavity and finally enters as *E2*. Th trajectory is part of the 100 ns on *E2d* given in Figure S1. The residues THR-75 and THR-107 are shown in ball and stick model (red). The  $K^+$ -ion represented as purple ball.

**Movie S4.** Trajectory showing possible rotation of *E-LAB-TEA* (licorice; cyan = carbon, blue = nitrogen, and white = hydrogens) from *E1* to *E2* outside the cavity (new cartoon model) and its entry as *E2*. This trajectory is part of 100 ns simulation on *E1c* given in Figure S1. The residues THR-75 and THR-107 are shown in ball and stick model (red). The  $K^+$ -ion represented as purple ball.

**Movie S5.** Simulation trajectory of *E-LAB-TEA* (licorice; cyan = carbon, blue = nitrogen, red = oxygen, and white = hydrogens) with  $K^+$ -ion (purple ball) inside the cavity (new cartoon model) shows prompt exit of *E1* from the channel cavity. This trajectory is part of 100 ns simulation when a total of six simulations (three for each *E1* and *E2*) performed on the  $KcsA-K^+-E-LAB-TEA$  systems. Out of the three simulations one is 400 ns and remaining two are 100 ns each). The residues THR-75 and THR-107 are shown in ball and stick model (red).

## Supplementary Scheme S1

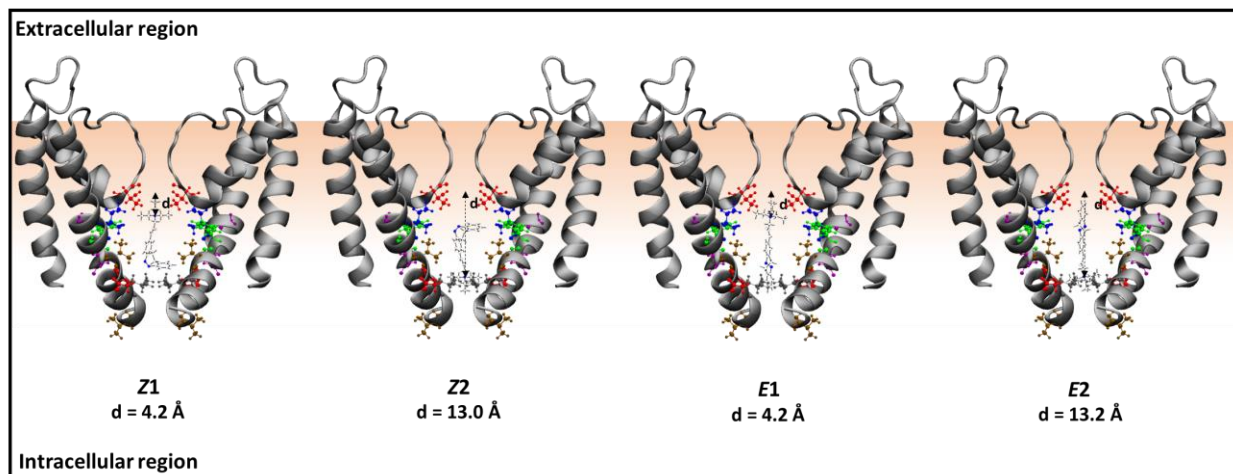

**Scheme S1.** Schematic representation of KcsA-LAB-TEA starting conformations used for the simulation without  $K^+$ -ion. The open KcsA (PDB ID: 3F5W) showing only two diagonally opposite subunits, and is represented as a new cartoon. The TEA and amino-acids represented by ball and stick model (red = threonine (THR-75 and THR-107), purple = glycine (GLY-99), blue = isoleucine (ILE-100), green = phenylalanine (PHE-103), ochre = valine (VAL-106 and VAL-115), grey = leucine (LEU-110)). The azo-nitrogens and TEA nitrogen are shown as blue in colour. The purple ball represents the potassium ion. And  $d$  represents the distance between the center of  $C_{\alpha}$  of THR-75 and nitrogen of TEA.



## Supplementary Figures S1-S35

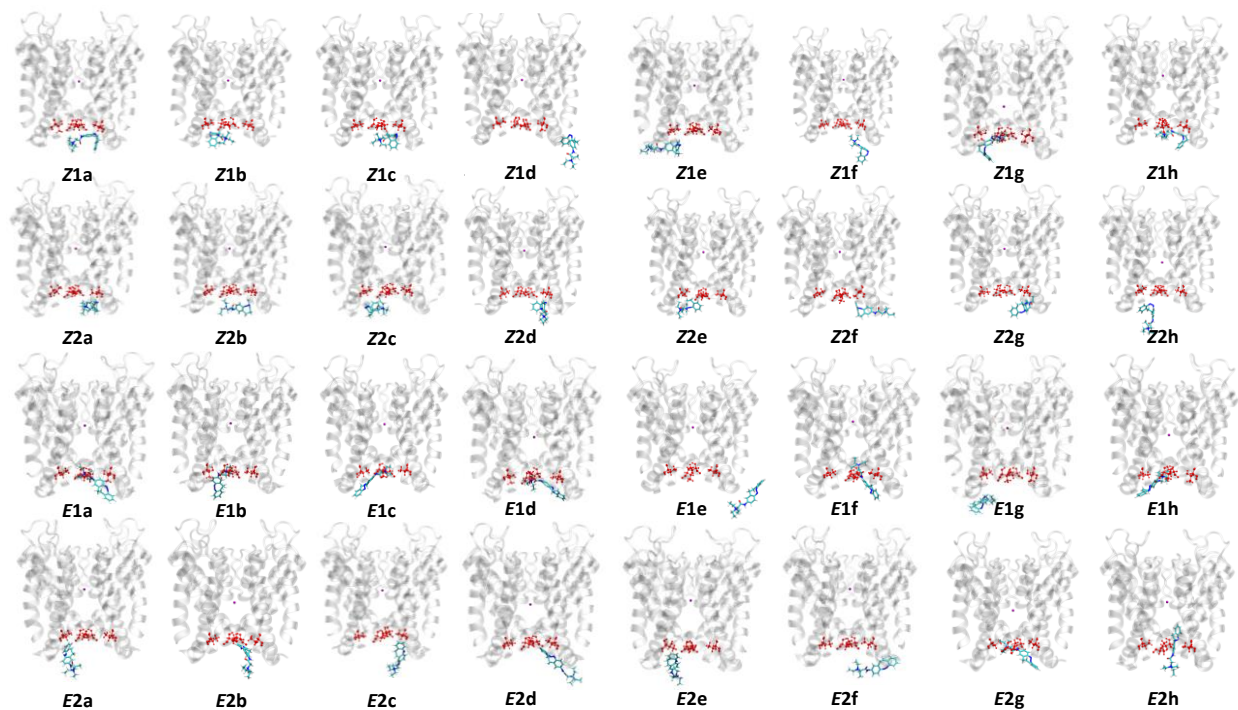

**Figure S1.** Starting structures resulted after equilibration for the molecular dynamics simulation of Z1 (Z1a-Z1h), Z2 (Z2a-Z2h), E1 (E1a-E1h) and E2-isomers (E2a-E2h) of LAB-TEA (stick model) with KcsA-K<sup>+</sup>-ion channel (new cartoon representation in grey colour) with one K<sup>+</sup>-ion (purple ball). LAB-TEA is in the cytoplasmic region. The amino-acid residue THR-107 (red) shown in ball and stick model. Note that we have not studied the dynamics of  $Z \leftrightarrow E$  photoisomerization inside the potassium ion channel directly. All the structures were subjected to 100 ns simulation except Z1a, Z2a, E1a, and E2a (400 ns).

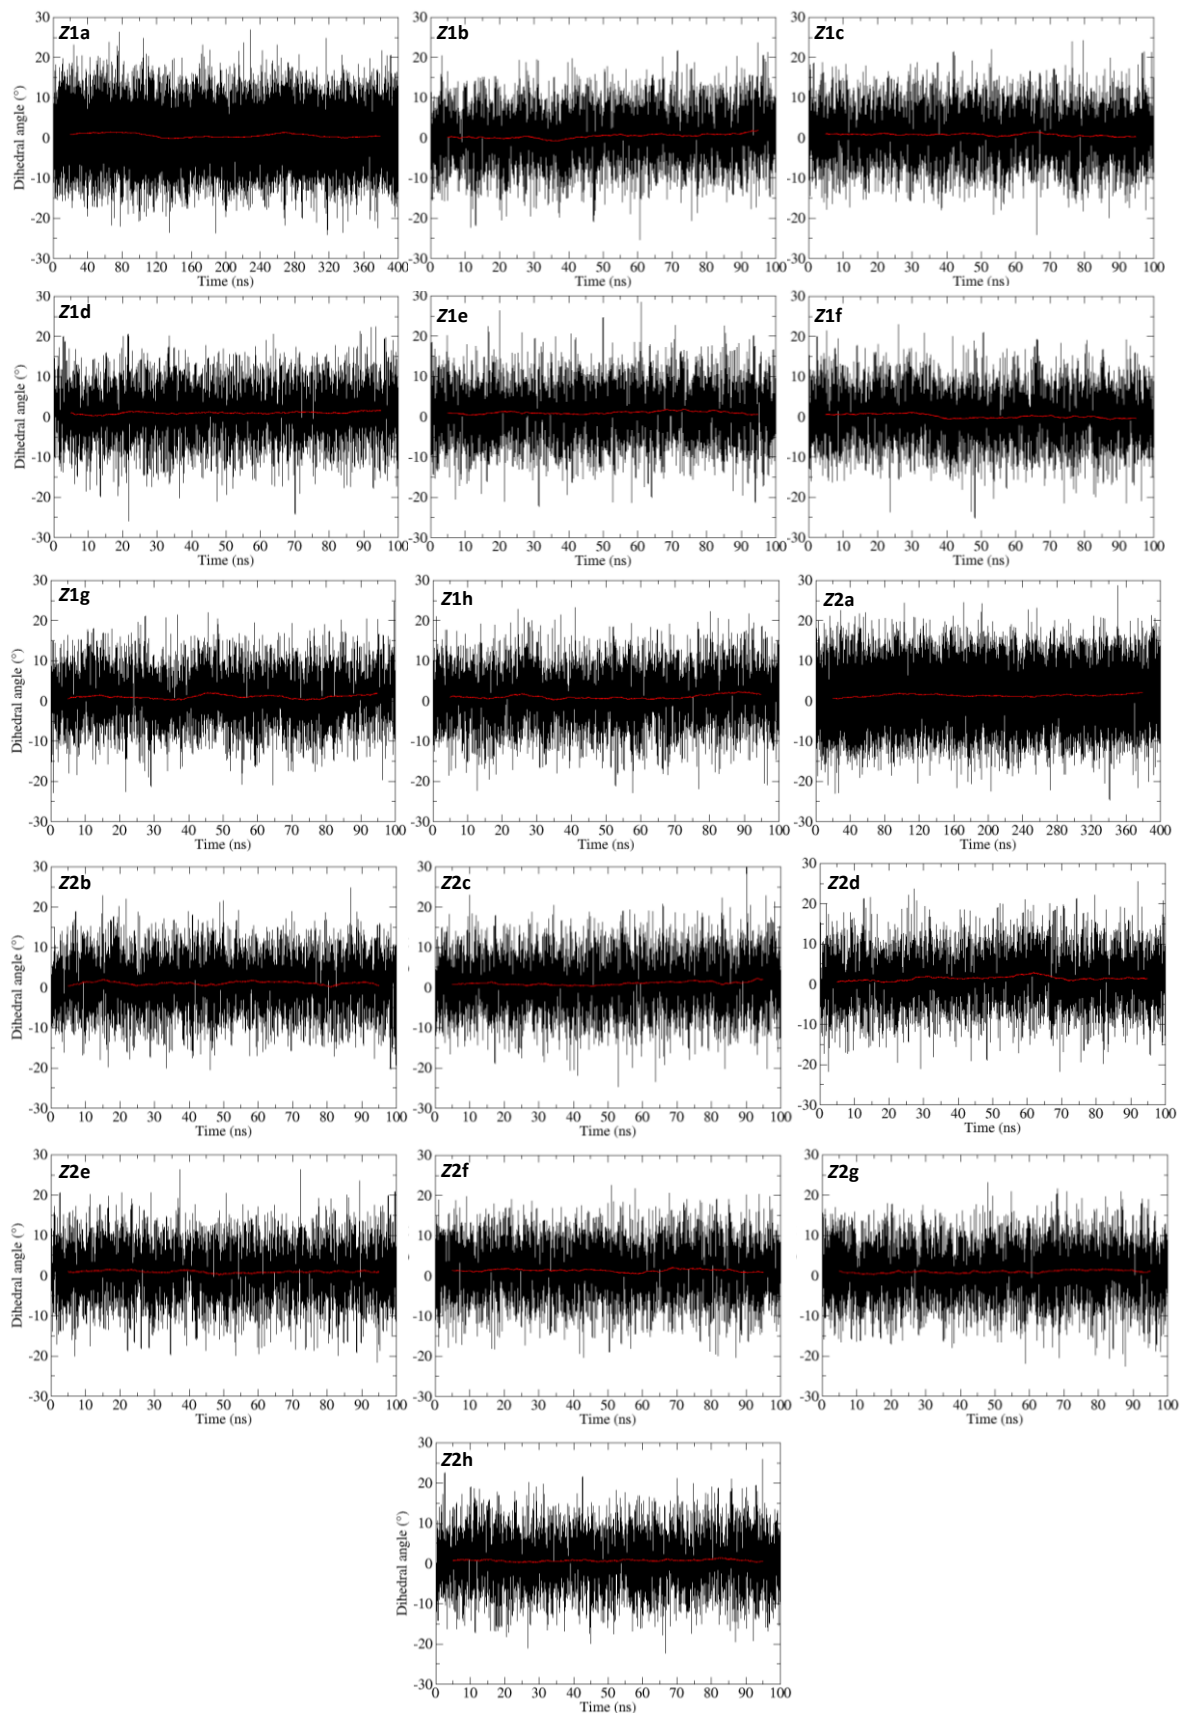

**Figure S2.** Dihedral angle plot (Time (ns) vs. Dihedral angle (degree)) for Z-LAB-TEA when placed in the cytoplasmic region during simulation with one  $K^+$ -ion. The red line represents the average dihedral angle in degrees.

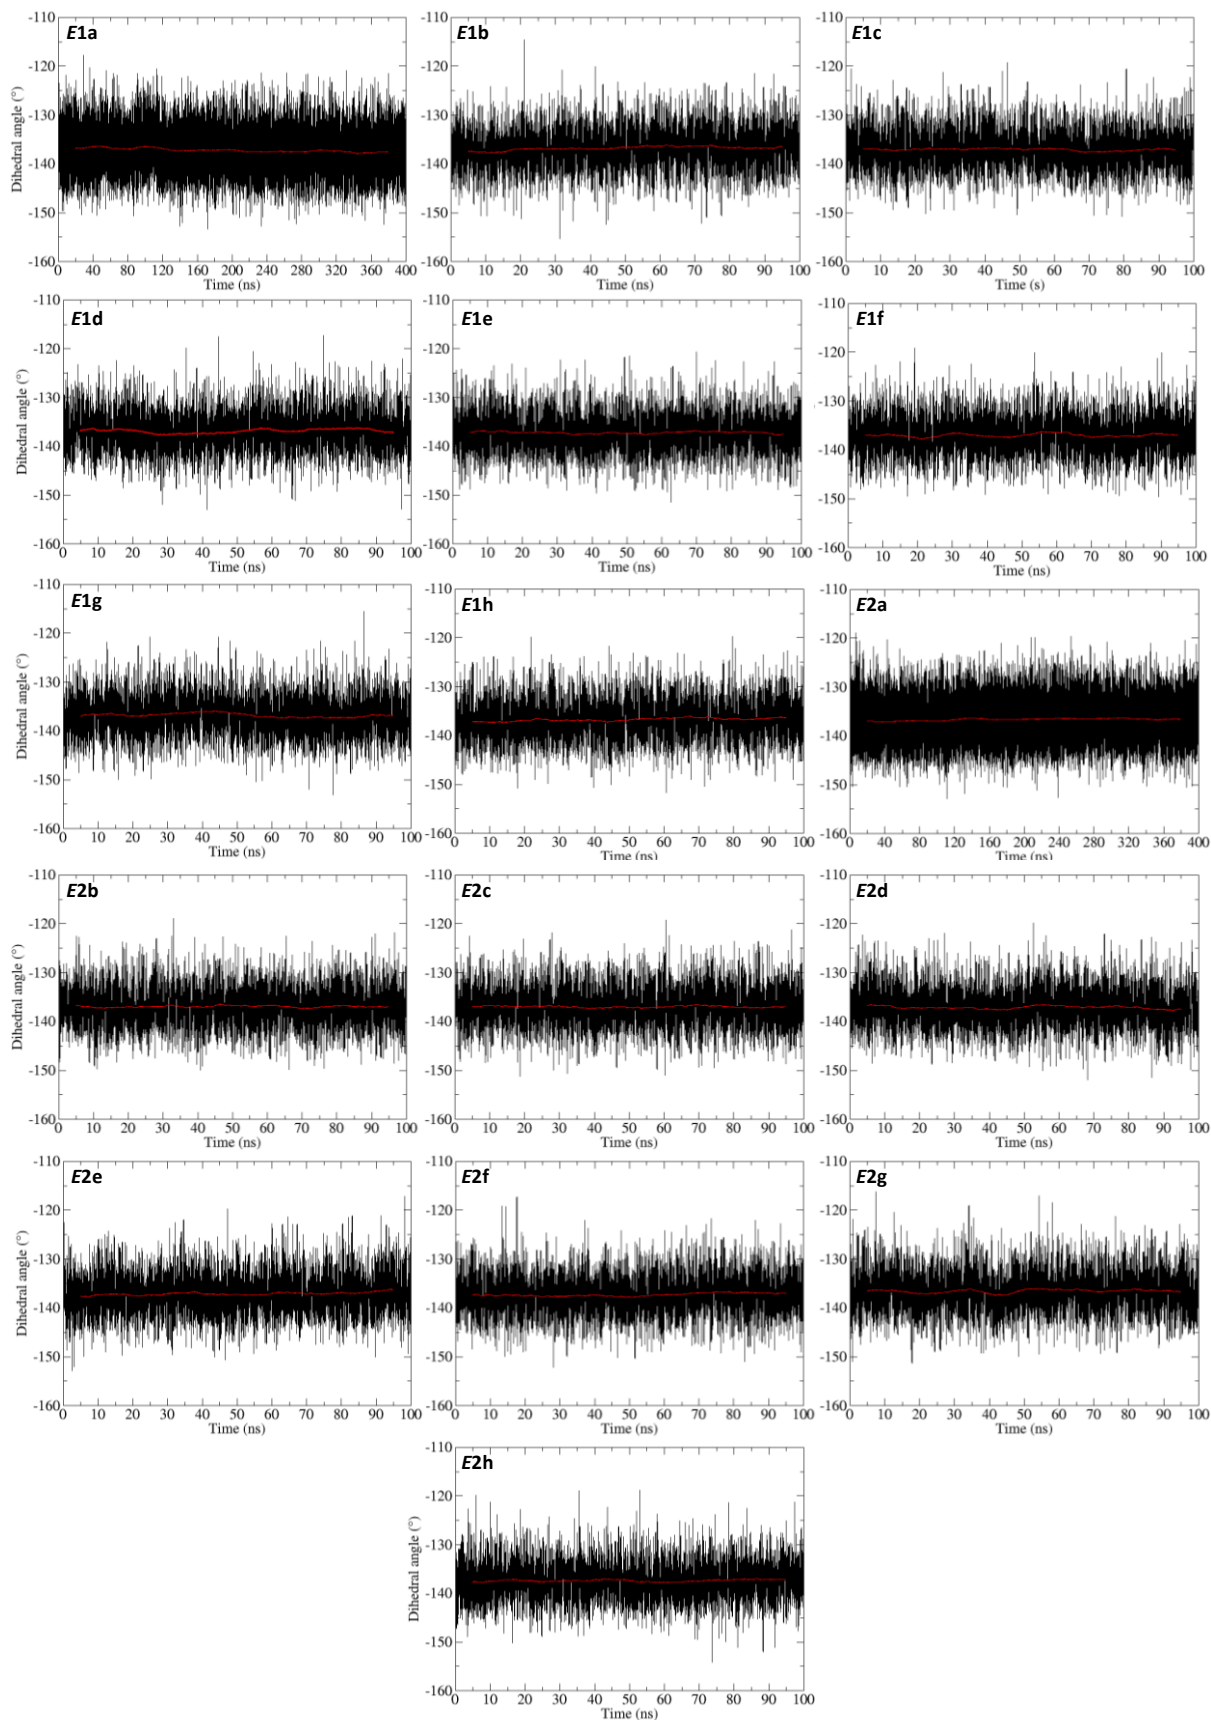

**Figure S3.** Dihedral angle plot (Time (ns) vs. Dihedral angle (degree)) for *E*-LAB-TEA when placed in the cytoplasmic region during simulation with one K<sup>+</sup>-ion. The red line represents the average dihedral angle in degrees.

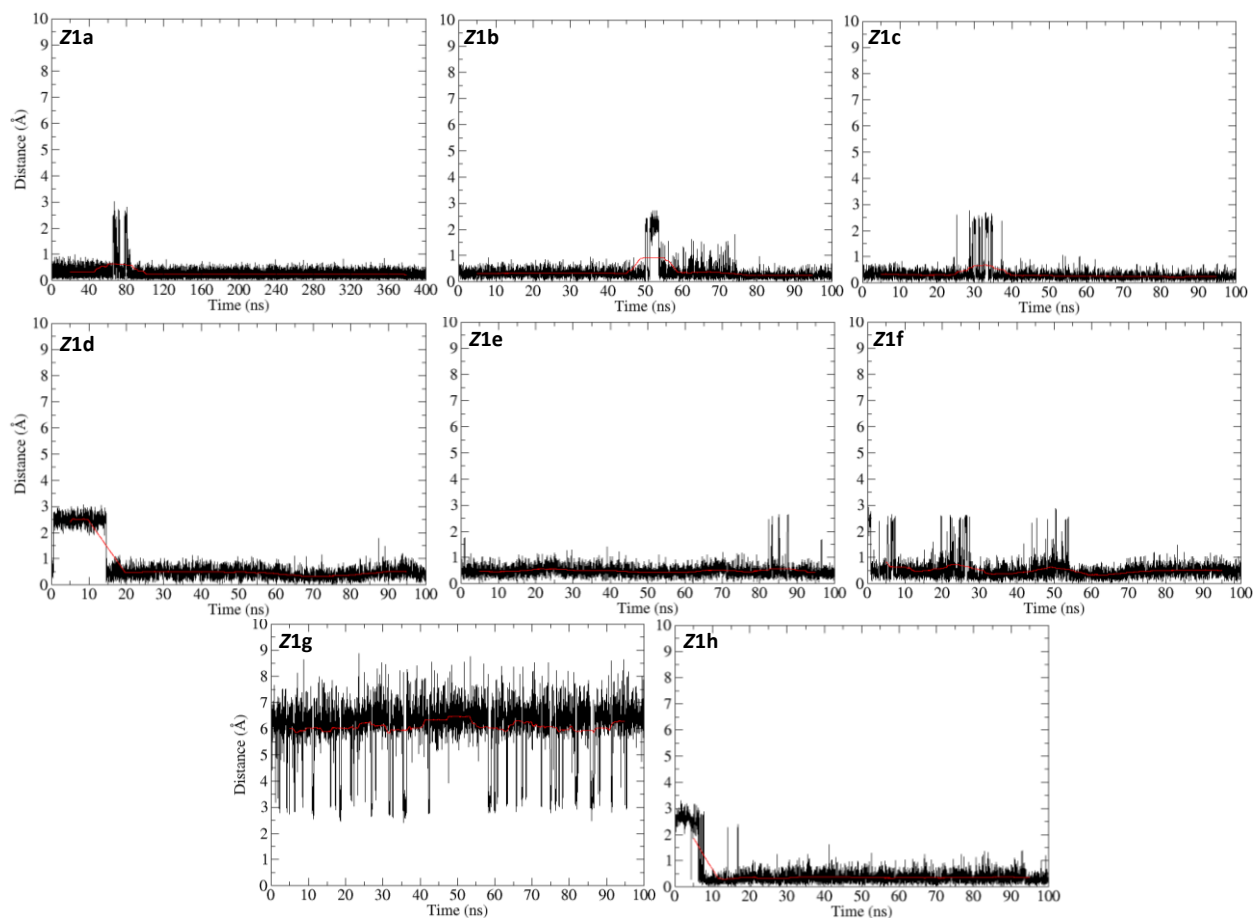

**Figure S4.** Distance plot (Time (ns) vs. Distance (Å)) showing variation in the K<sup>+</sup>-C<sub>α</sub>THR-75 distances during the simulations started with Z1 with one K<sup>+</sup>-ion. The red line represents the average value in Angstrom.

**Note:** The profile of Z1g differs from the rest because the simulation of Z1g was performed with a restraint of 0.5 kcal/mol/Å<sup>2</sup> on the K<sup>+</sup> ion. The observed deviation in K<sup>+</sup>-C<sub>α</sub>THR-75 distances results from the possible electrostatic repulsion between the positively charged K<sup>+</sup>-ion and TEA moiety. It also indicates that the binding of LAB-TEA to the channel cavity would displace the K<sup>+</sup>-ions. The profile for Z2 (1.5%) was not obtained due to its scant presence in the channel cavity.

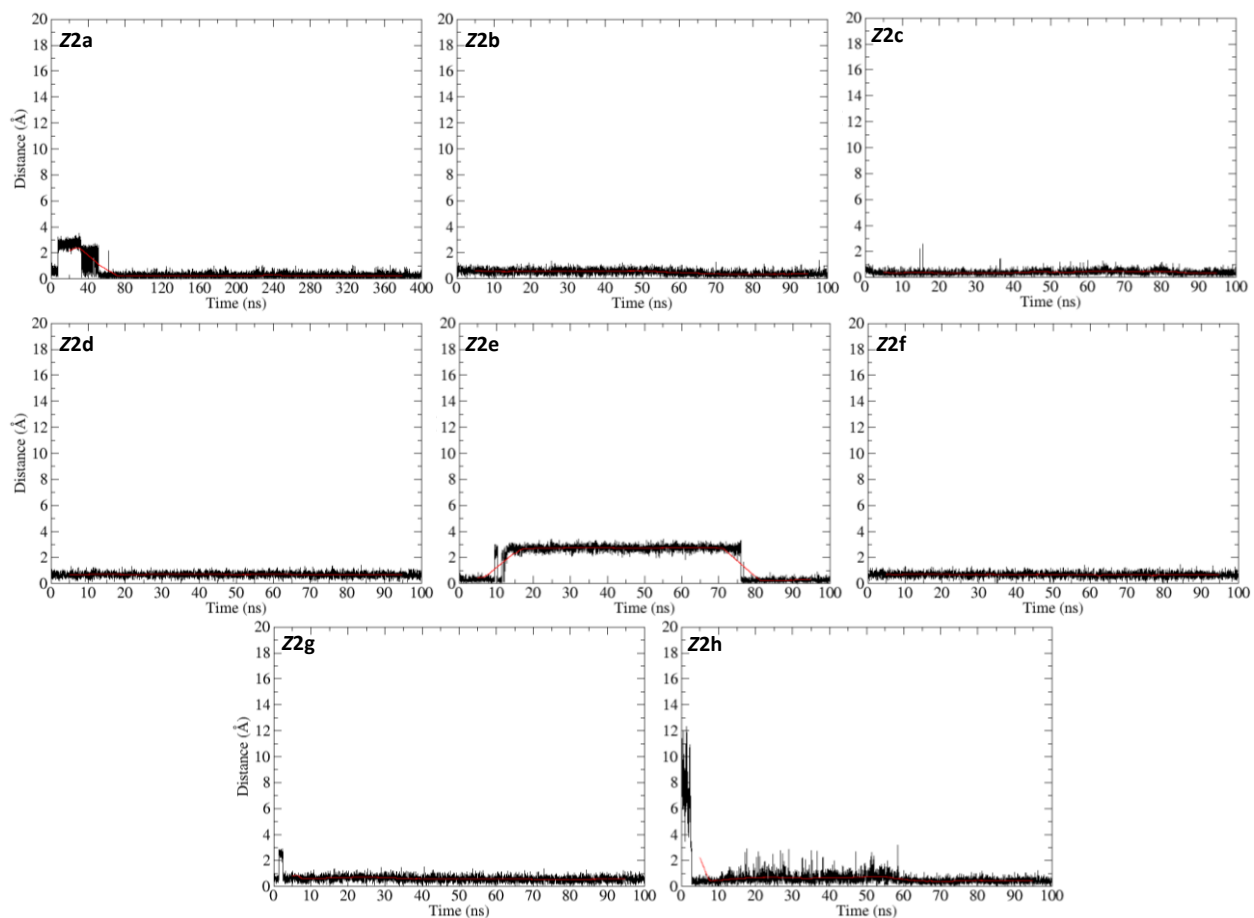

**Figure S5.** Distance plot (Time (ns) vs. Distance (Å)) showing variation in the  $K^+$ - $C_{\alpha}^{THR-75}$  distances during the simulations started with Z2 with one  $K^+$ -ion. The red line represents the average value in Angstrom.

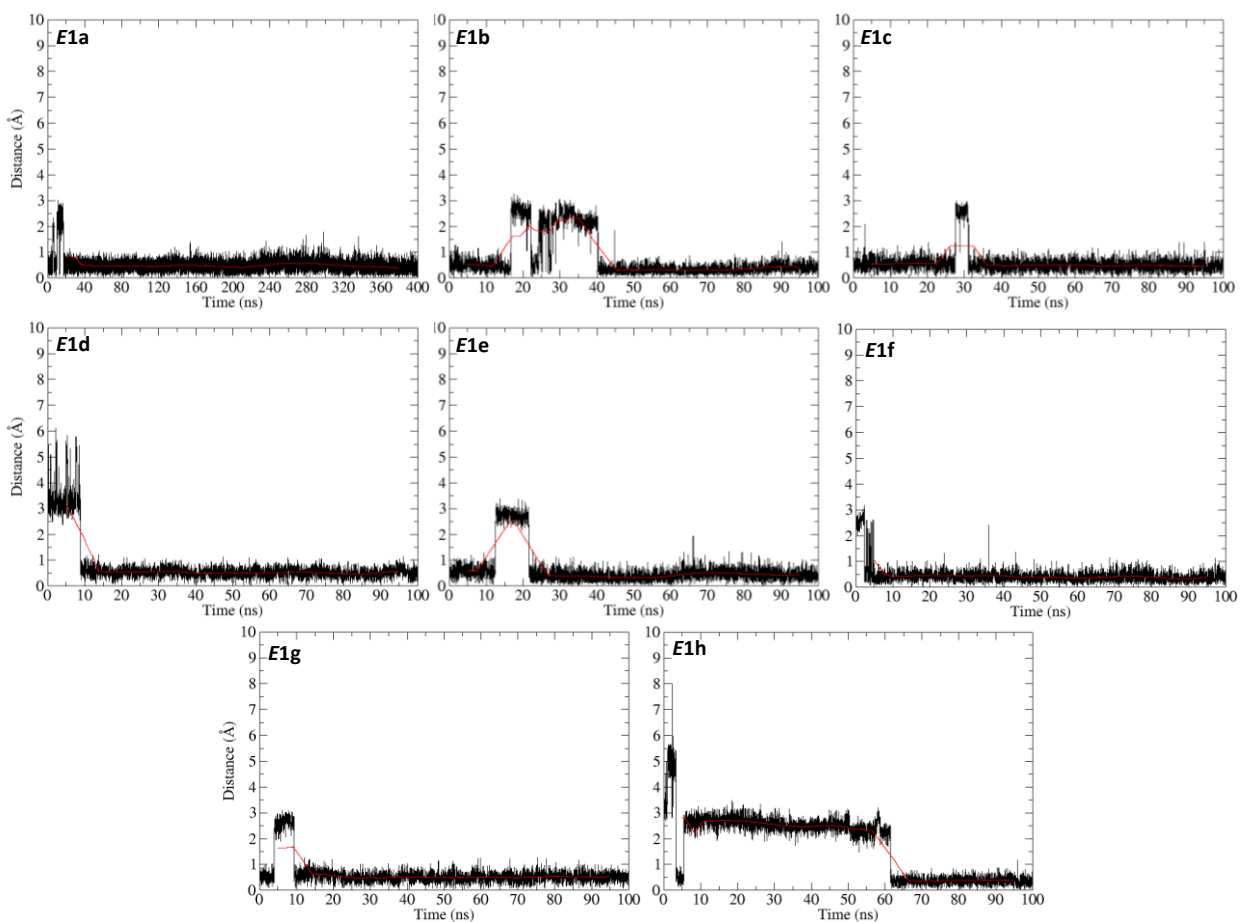

**Figure S6.** Distance plot (Time (ns) vs. Distance (Å)) showing variation in the  $K^+$ - $C_{\alpha}^{THR-75}$  distances during the simulations started with *E1* with one  $K^+$ -ion. The red line represents the average value in Angstrom.

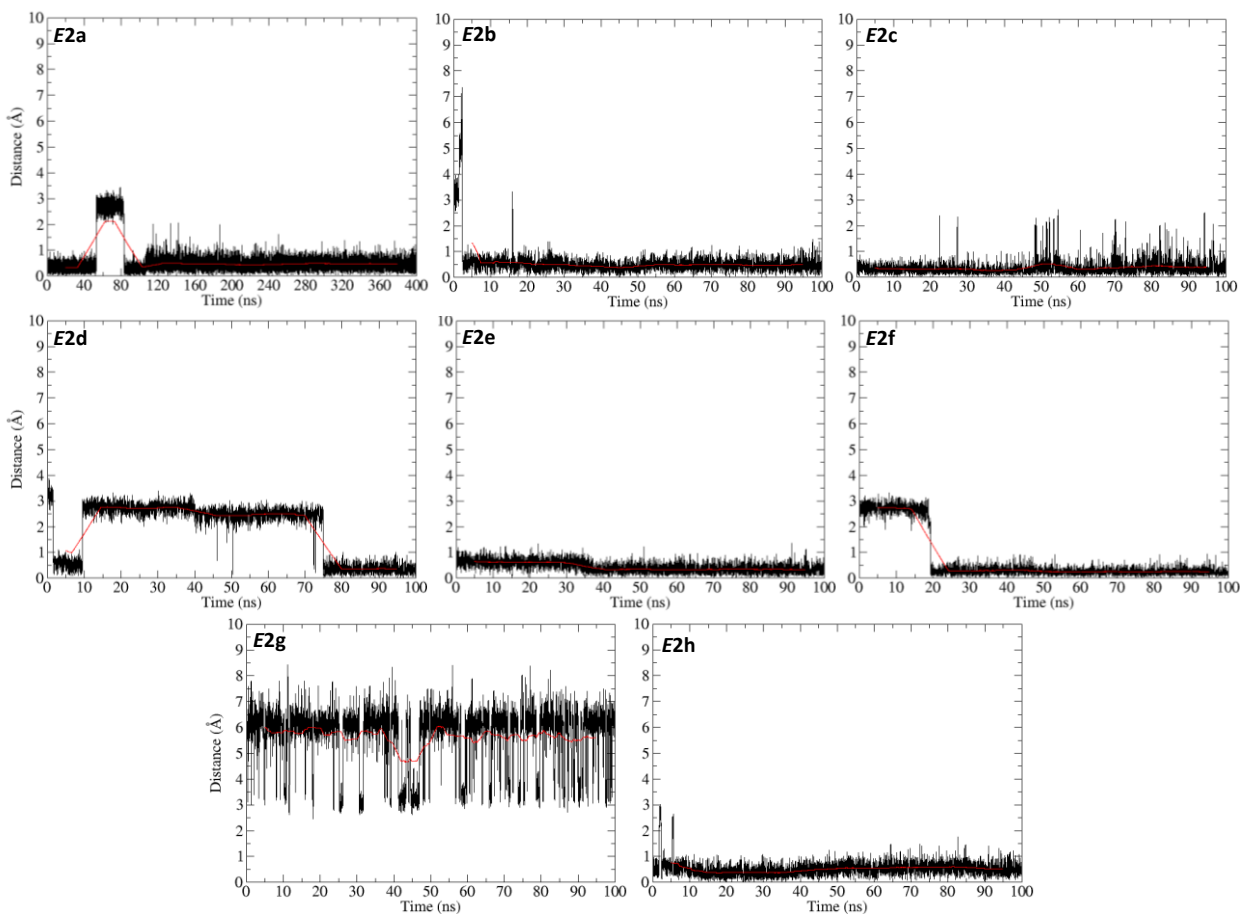

**Figure S7.** Distance plot (Time (ns) vs. Distance (Å)) showing variation in the  $K^+$ - $C_{\alpha\text{THR-75}}$  distances during the simulations started with *E2* with one  $K^+$ -ion. The red line represents the average value in Angstrom.

**Note:** The profile of *E2g* differs from the rest because the simulation of *E2g* was performed with a restraint of  $0.5 \text{ kcal/mol}/\text{\AA}^2$  on the  $K^+$ -ion. The observed deviation in  $K^+$ - $C_{\alpha\text{THR-75}}$  distances results from the possible electrostatic interaction between the positively charged  $K^+$ -ion and LAB moiety. It also, indicates that the binding of LAB-TEA to the channel cavity would displace the  $K^+$ -ions. The profile for *E1* (0.0%) was not obtained due to its scant presence in the channel cavity simultaneously with the  $K^+$  ion. (**Movie S5**).



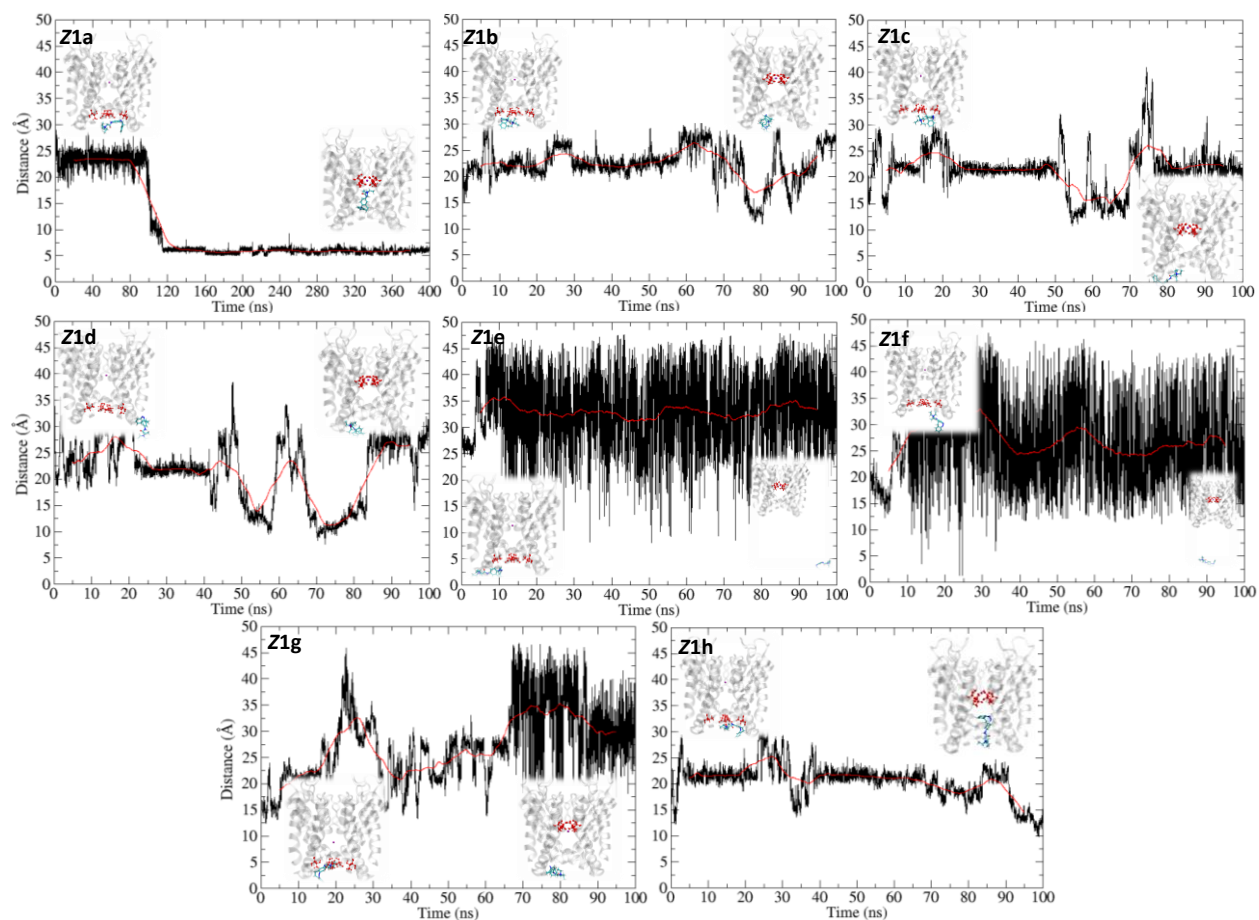

**Figure S8.** Distance plot (Time (ns) vs. Distance (Å)) showing variation in the TEAN-C<sub>α</sub>THR-75 distances during the simulations started with Z1 with one K<sup>+</sup>-ion. The red line represents the average value in Angstrom. The starting position and the preferable position of LAB-TEA during the simulation are shown in left and right insets, respectively.

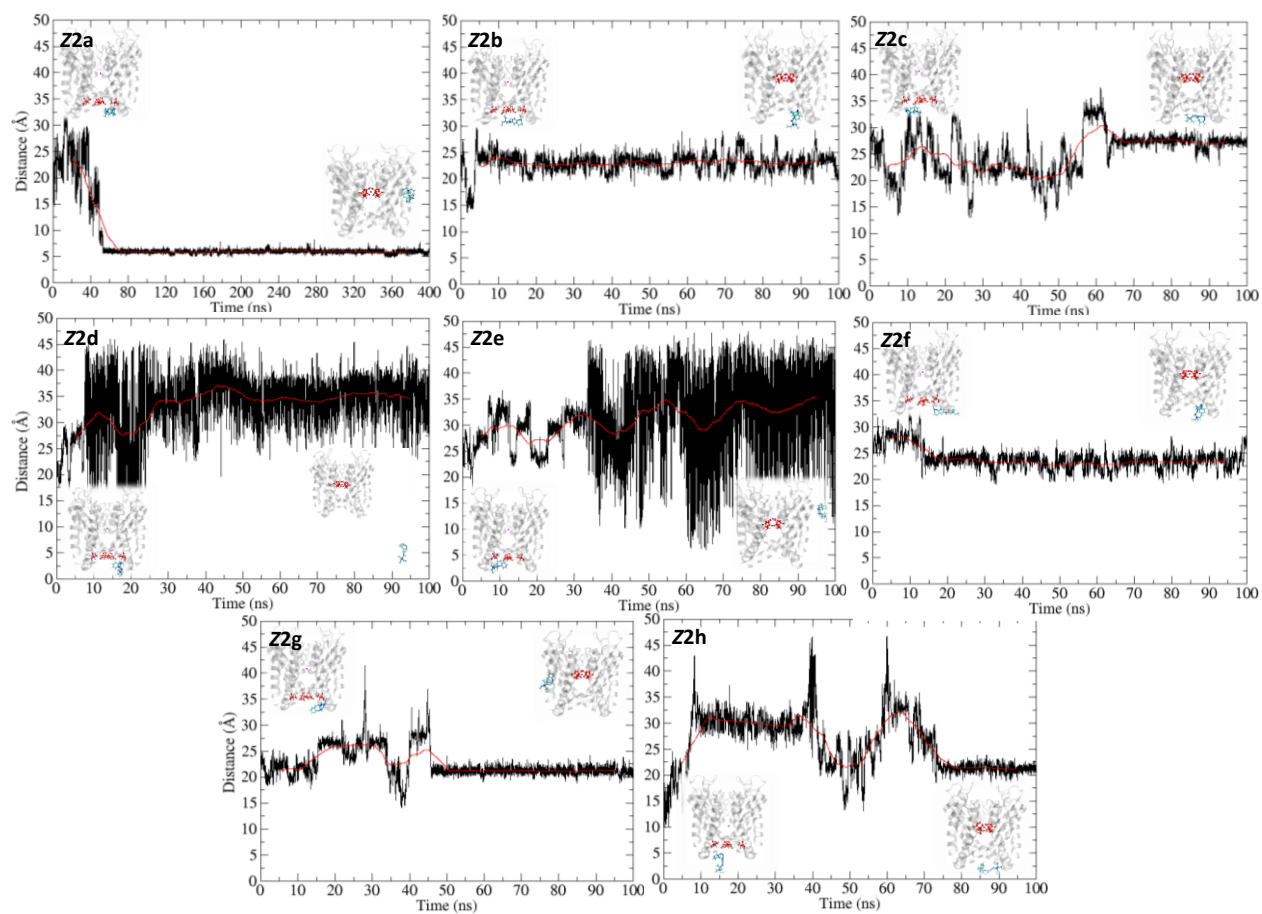

**Figure S9.** Distance plot (Time (ns) vs. Distance (Å)) showing variation in the  $TEAN-C_{\alpha THR-75}$  distances during the simulations started with Z2 with one  $K^+$ -ion. The red line represents the average value in Angstrom. The starting position and the preferable position of LAB-TEA during the simulation shown in left and right insets, respectively.

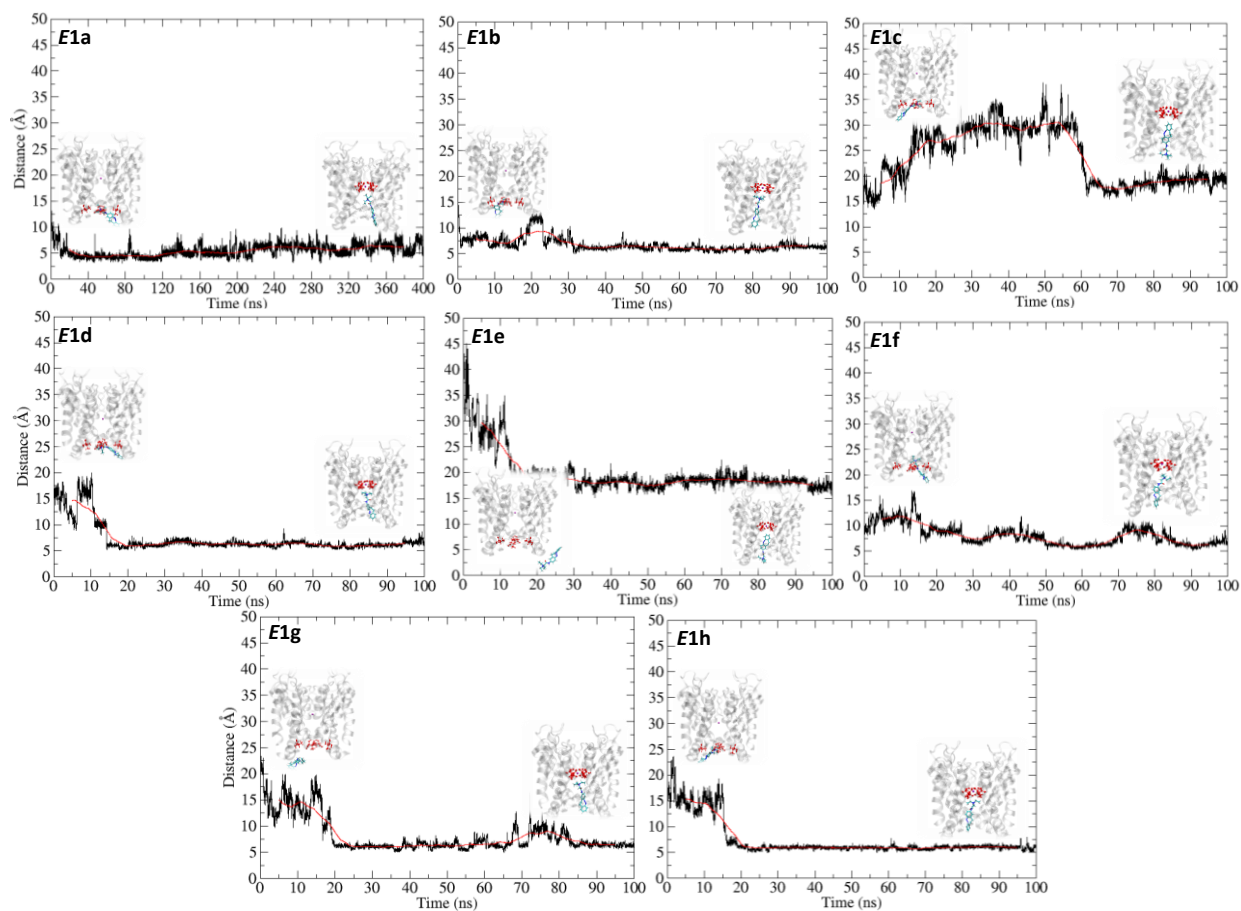

**Figure S10.** Distance plot (Time (ns) vs. Distance (Å)) showing variation in the  $TEAN-C_{\alpha}THR-75$  distances during the simulations started with *E1* with one  $K^{+}$ -ion. The red line represents the average value in Angstrom. The starting position and the preferable position of LAB-TEA during the simulation are shown in left and right insets, respectively.

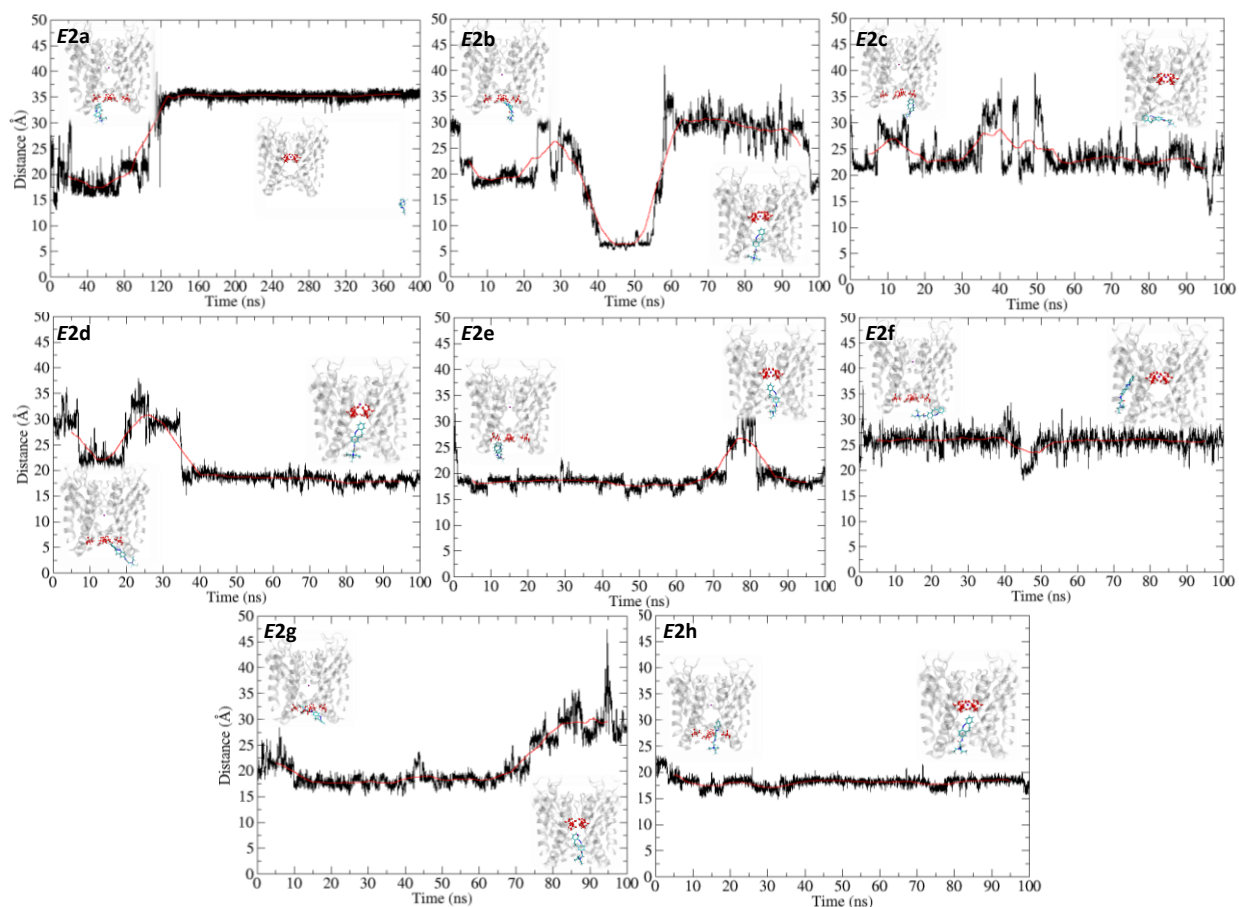

**Figure S11.** Distance plot (Time (ns) vs. Distance (Å)) showing variation in the  $TEAN-C_{\alpha}THR-75$  distances during the simulations started with  $E2$  with one  $K^{+}$ -ion. The red line represents the average value in Angstrom. The starting position and the preferable position of LAB-TEA during the simulation are shown in left and right insets, respectively.

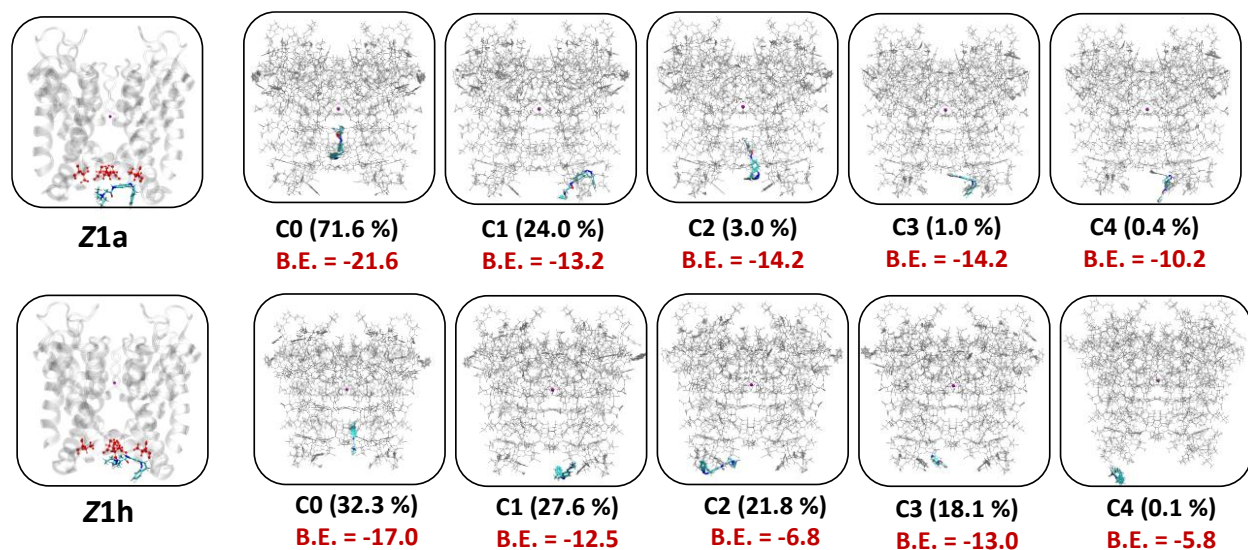

**Figure S12.** Summary of hierarchical average-linkage clustering performed on trajectories of Z-LAB-TEA with one  $K^+$ -ion (purple ball) showing binding of Z-isomer into the channel cavity, when LAB-TEA placed in the cytoplasmic region. Z1a and Z1h are the starting structures resulting in Z1 and Z2 binding conformations respectively. The average structure of each cluster is shown, indicating location of LAB-TEA relative to the ion channel. Cn (n = 0 – 4) indicates different clusters. Percentage occurrence of each cluster is given in parenthesis. Corresponding binding energy (B.E.) is given in kcal/mol. Protein is represented as new cartoon in the starting structure and as lines in the average structures. LAB-TEA is shown as a stick model.

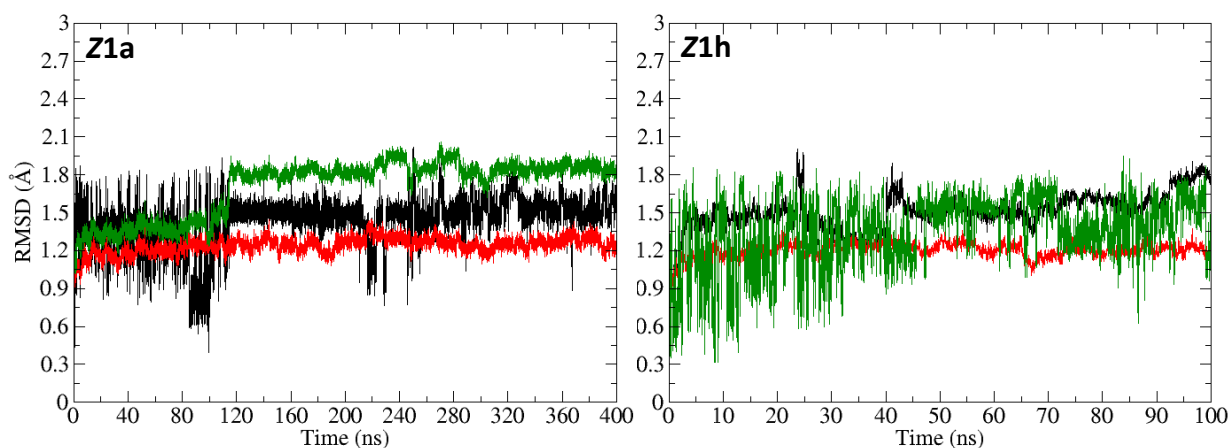

**Figure S13.** Root-mean-square deviation plot (Time (ns) vs. RMSD (Å)) for Z-LAB-TEA with one  $K^+$ -ion resulting in the entry of Z-isomer to the channel cavity, when LAB-TEA placed in the cytoplasmic region. Z1a and Z1h are the starting structure for that particular trajectory resulting in Z1 and Z2 respectively. Black, red, and green graphs show RMSD of KcsA with Z-LAB-TEA, KcsA alone, and Z-LAB-TEA alone respectively.

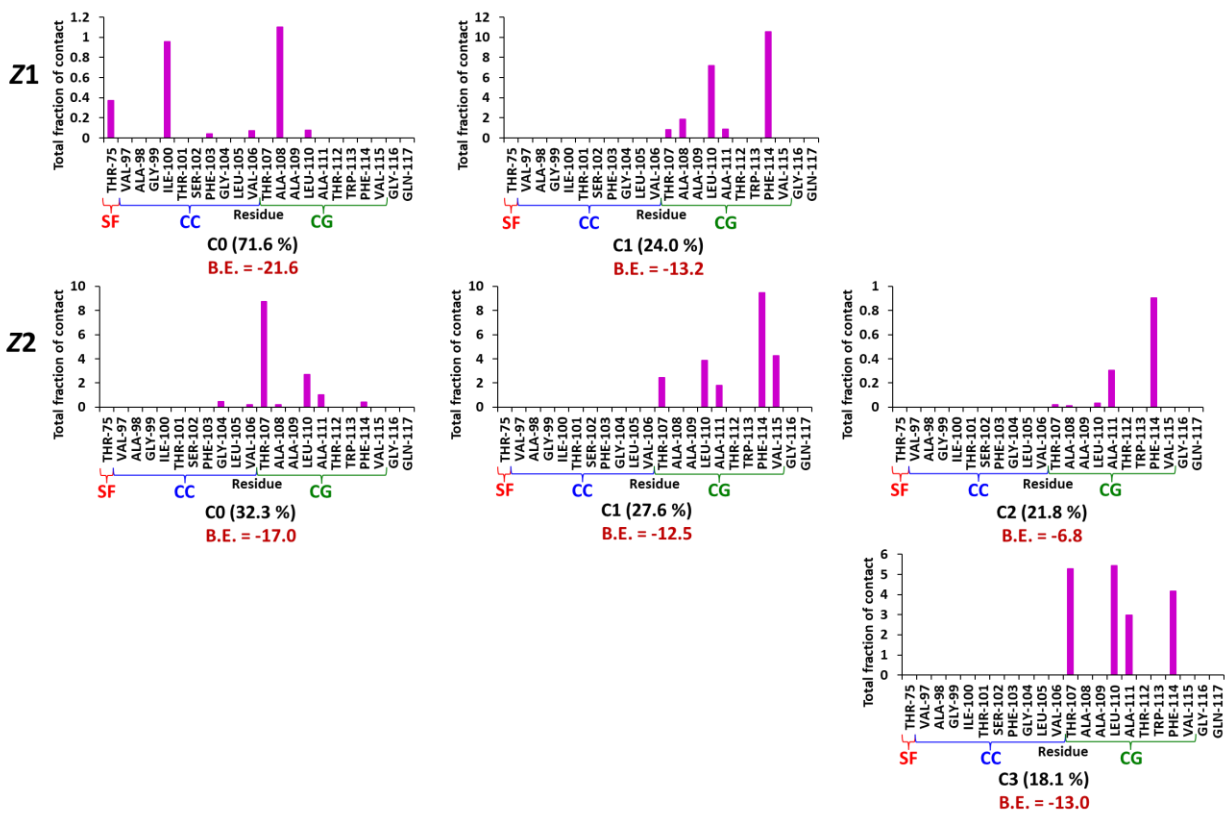

**Figure S14.** Contact plot per residue for the most probable cluster trajectories (Cn with percentage > 10) of KcsA-Z-LAB-TEA with K<sup>+</sup>-ion resulting in Z1 and Z2 conformations, when LAB-TEA placed in the cytoplasmic region. Binding energy in kcal/mol is given in parenthesis. The SF, CC, and CG represent selectivity filter, channel cavity, and channel gate residues respectively.

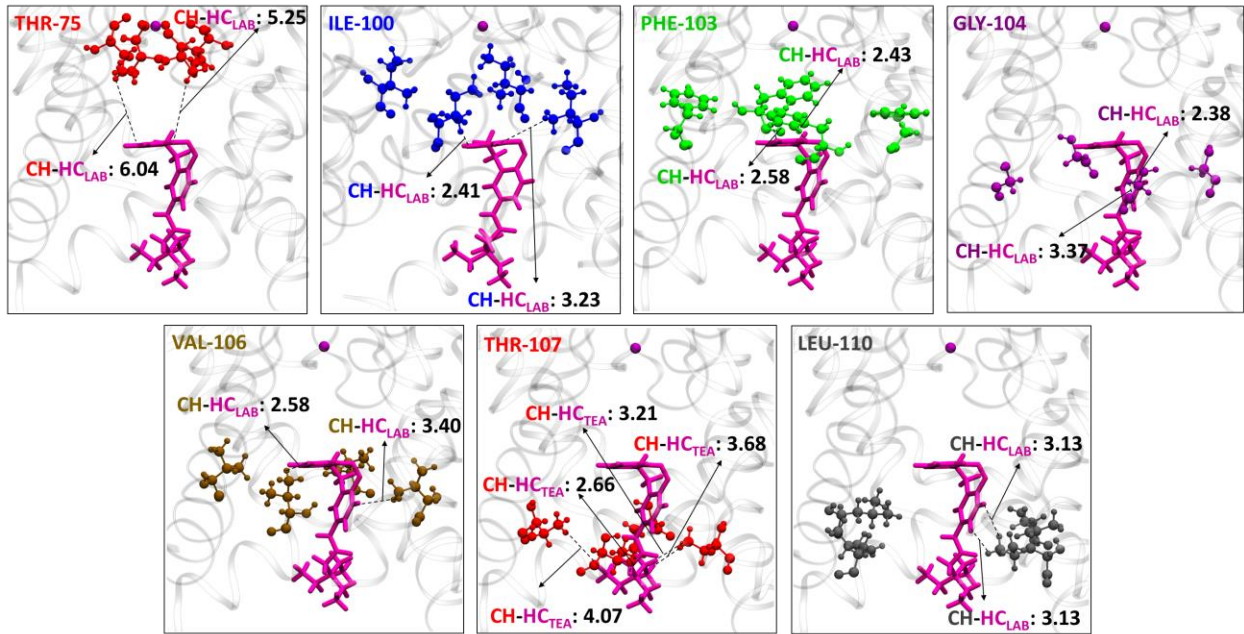

**Figure S15.** Interaction of Z2 conformation with individual channel residues in the most probable conformation (C0), of the trajectory resulting in Z-entry to the KcsA channel cavity, when simulation performed with one K<sup>+</sup>-ion (purple ball model) inside the channel and Z-LAB-QA in the cytoplasmic region. The protein and Z2 represented as ribbon and stick (magenta) respectively, and the interacting residues THR-75 (red), ILE-100 (blue), PHE-103 (green), GLY-104 (purple), and THR-107 (red) from extracellular to intracellular region in ball and stick model. The distances are given in Angstrom. Residue numbers are given in the upper left corner of each box.

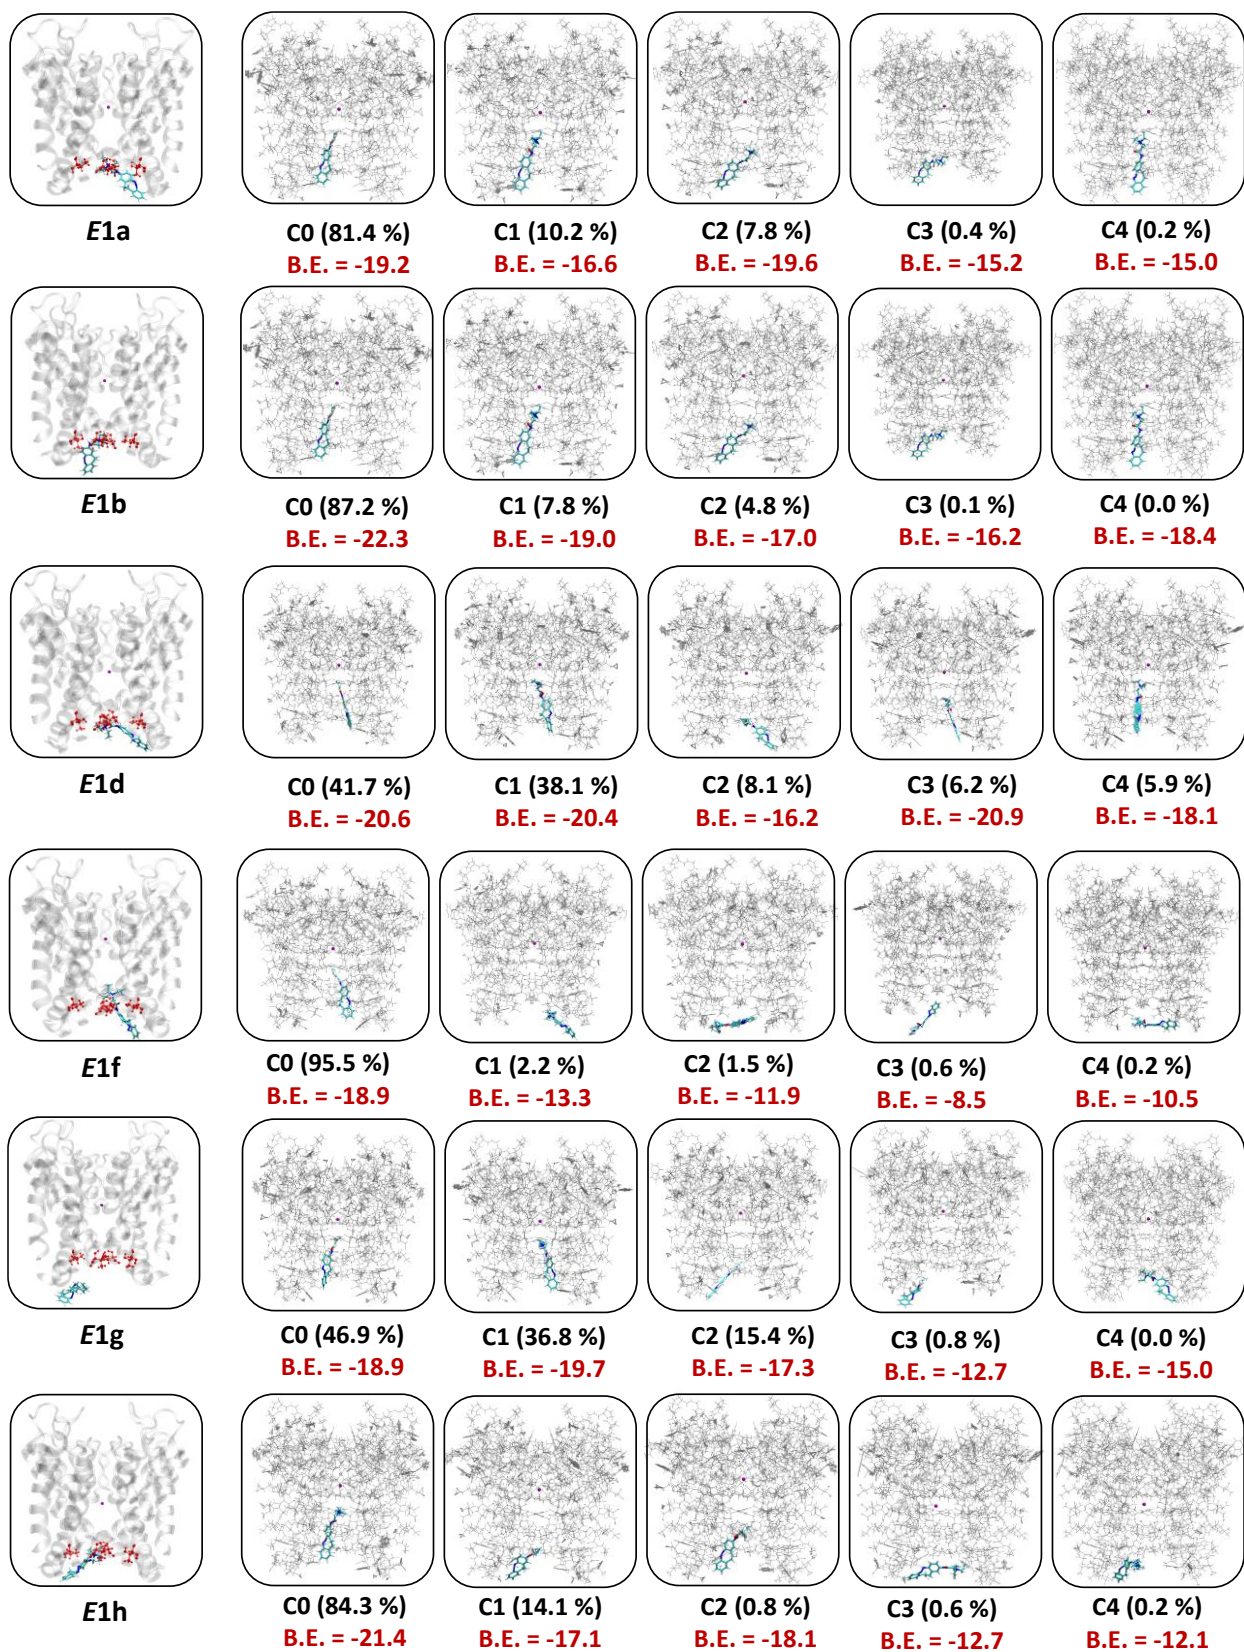



**Figure S16.** Summary of hierarchical average-linkage clustering performed on trajectories of *E*-LAB-TEA with one K<sup>+</sup>-ion (purple ball) showing entry of *E*-isomer into the channel cavity, when LAB-TEA placed in the cytoplasmic region, and resulting in *E1* conformation. Structures *E1a* to *E1h* are the starting structure for that particular trajectory. The average structure of each cluster is shown, indicating location of LAB-TEA relative to the ion channel. C<sub>n</sub> (n = 0 – 4) indicates different clusters. Percentage occurrence of each cluster is given in parenthesis. Corresponding binding energy (B.E.) is given in kcal/mol. Protein is represented as new cartoon in the starting structure and as lines in the average structures. LAB-TEA is shown as a stick model.

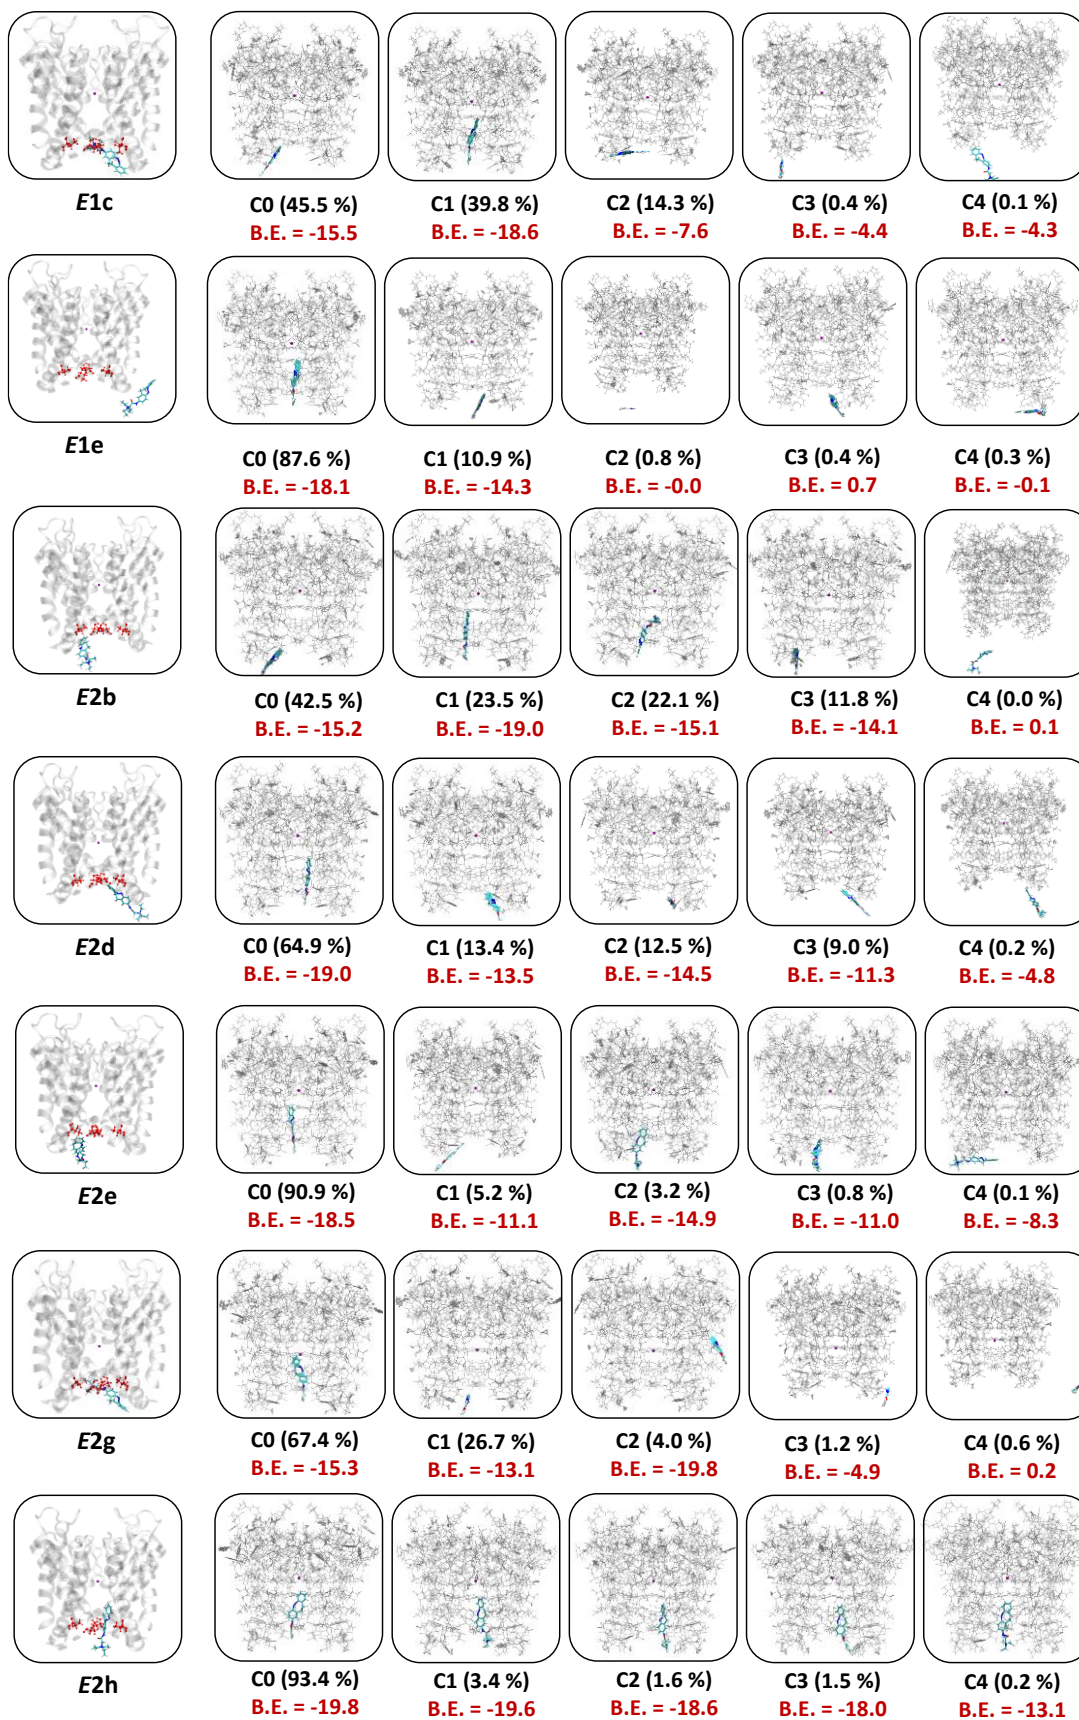

**Figure S17.** Summary of hierarchical average-linkage clustering performed on trajectories of *E*-LAB-TEA with one  $K^+$ -ion (purple ball) showing entry of *E*-isomer into the channel cavity, when LAB-TEA placed in the cytoplasmic region, resulting in *E2* conformation. *E1c* to *E2h* are the starting structure for that particular trajectory. The average structure of each cluster is shown, indicating the location of LAB-TEA relative to the ion channel. C<sub>n</sub> (n = 0 – 4) indicates different clusters. Percentage occurrence of each cluster is given in parenthesis. Corresponding binding energy (B.E.) is given in kcal/mol. Protein is represented as new cartoon in the starting structure and as lines in the average structures. LAB-TEA is shown as a stick model.

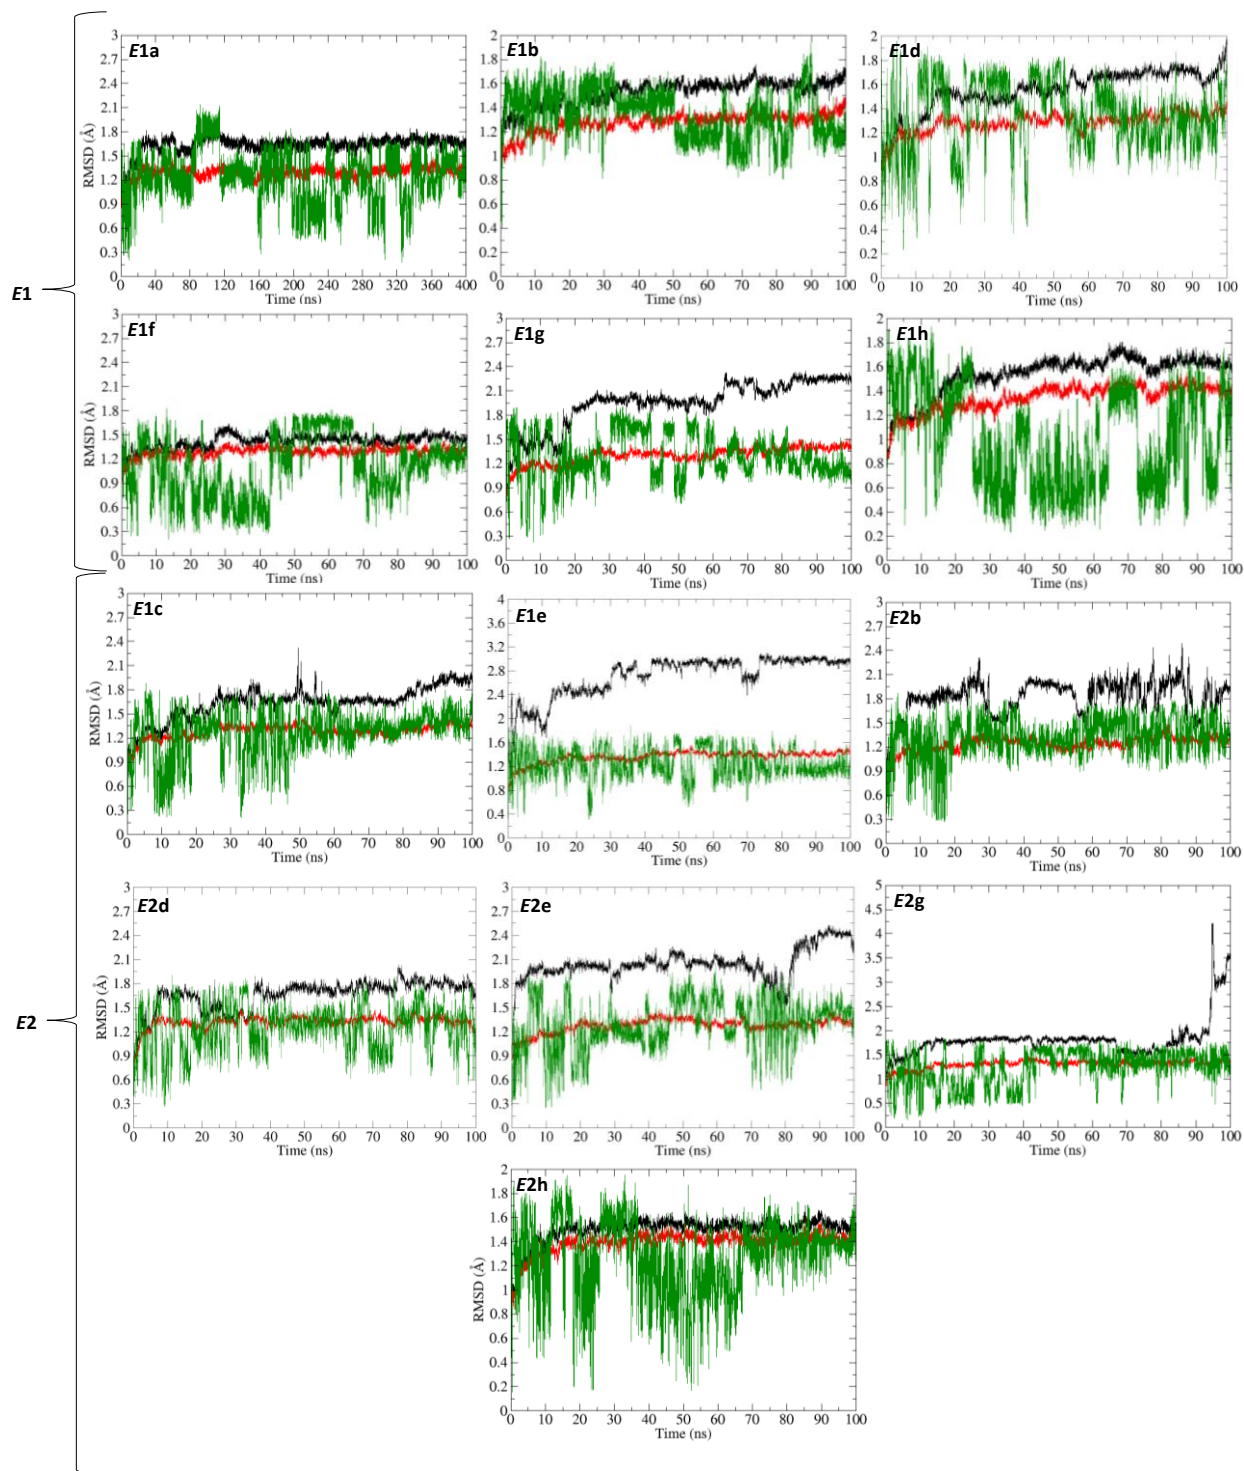

**Figure S18.** Root-mean-square deviation plot (Time (ns) vs. RMSD (Å)) for *E*-LAB-TEA with one  $K^+$ -ion resulting entry of *E*-isomer to the channel cavity, when LAB-TEA placed in the cytoplasmic region. *E1a* to *E2h* are the starting structure for that particular trajectory. Black, red, and green graphs show RMSD of KcsA with *E*-LAB-TEA, KcsA alone, and *E*-LAB-TEA alone respectively. The red line represents the average value in Angstrom.

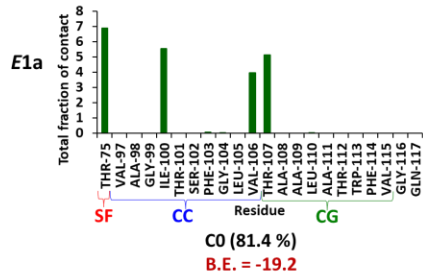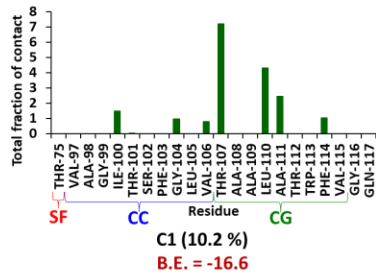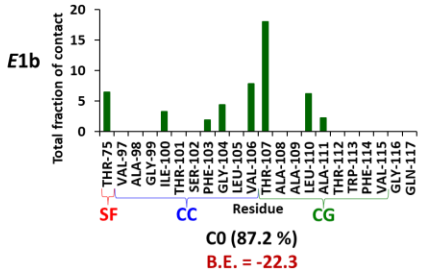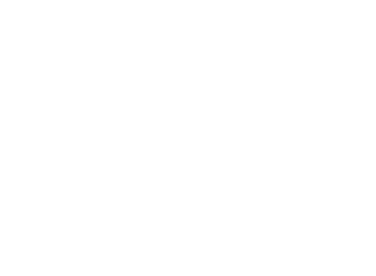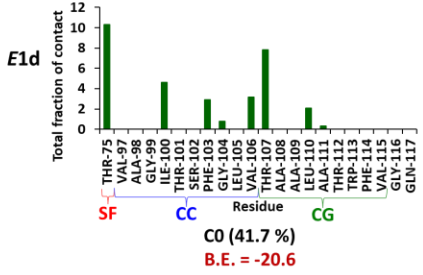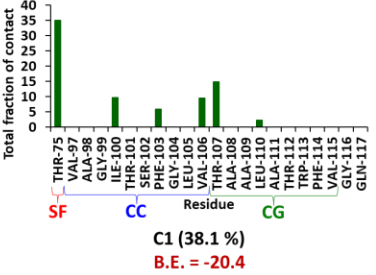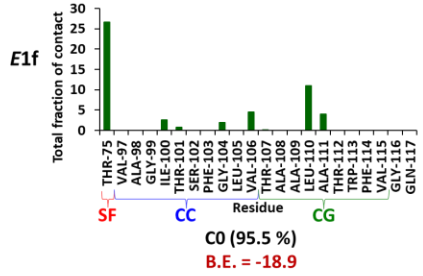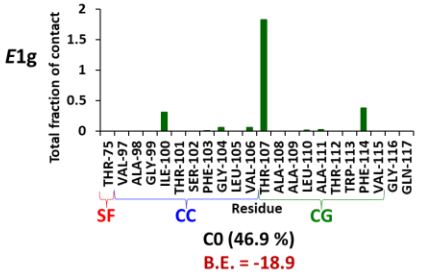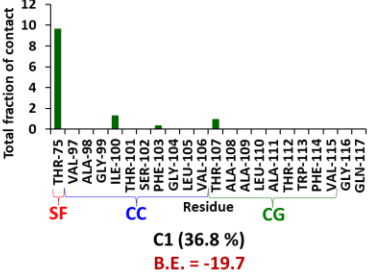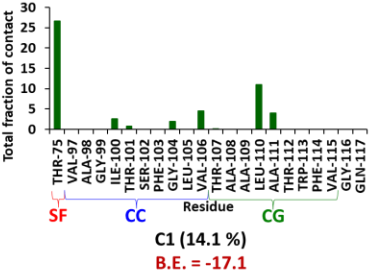

**Figure S19.** Contact plot per residue for the most probable cluster trajectories (Cn with percentage > 10) of KcsA–E-LAB-TEA with K<sup>+</sup>-ion resulting in E1 (E1a, E1b, E1d, E1f, E1g, and E1h) conformation, when LAB-TEA placed in the cytoplasmic region. Binding energy in kcal/mol is given in parenthesis. The SF, CC, and CG represent selectivity filter, channel cavity, and channel gate residues respectively.

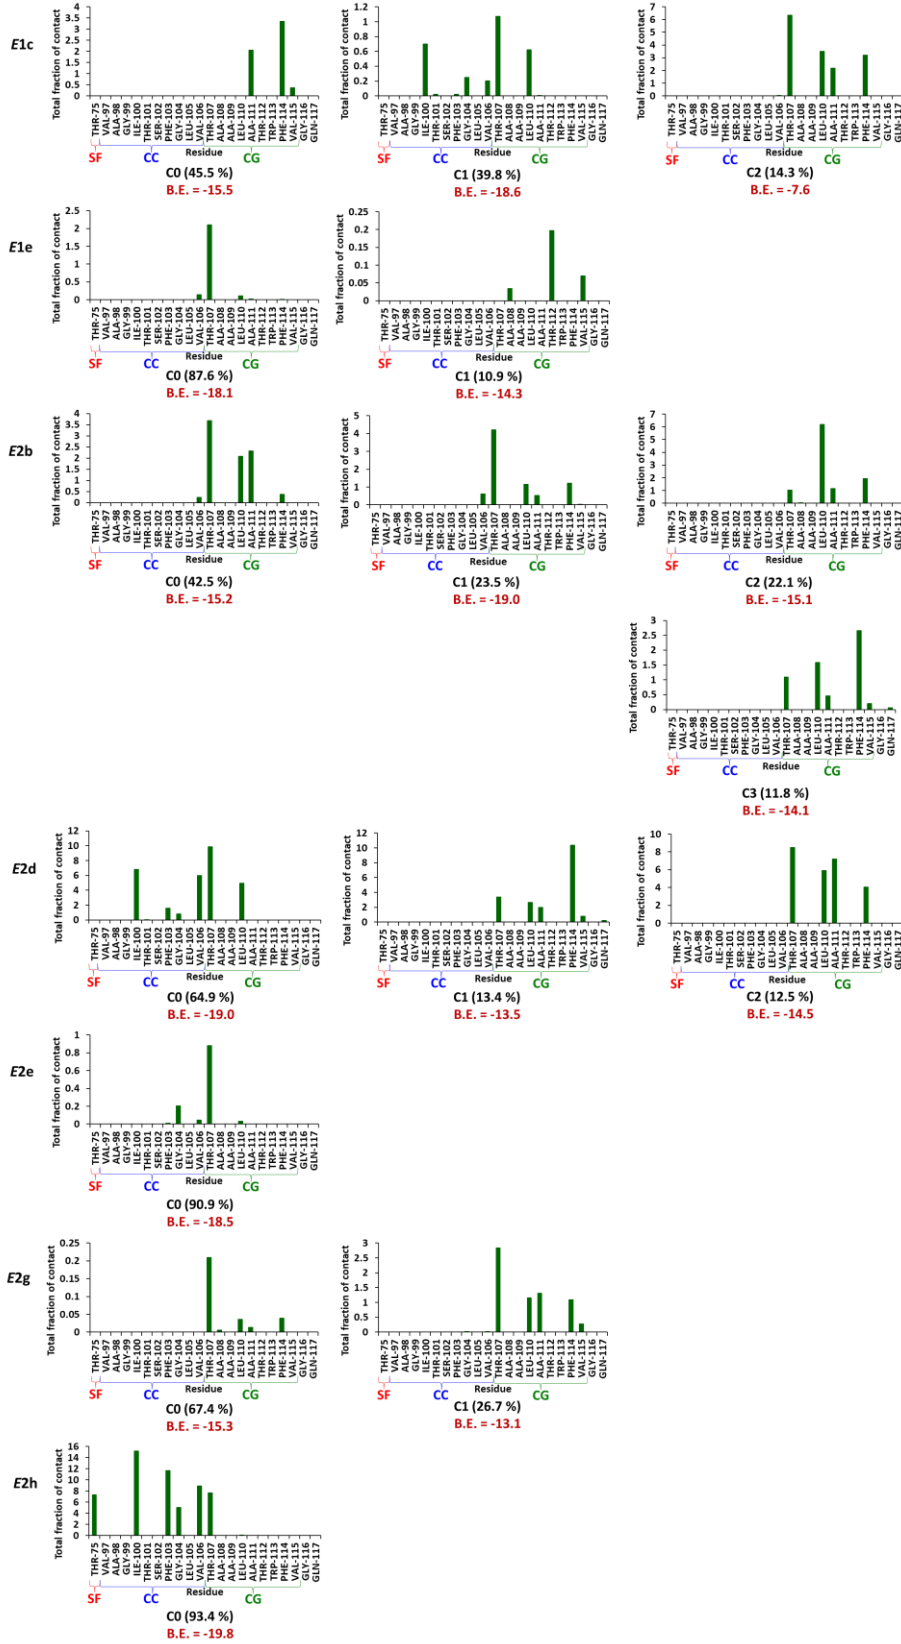

**Figure S20.** Contact plot per residue for the most probable cluster trajectories (Cn with percentage > 10) of KcsA–*E*-LAB-TEA with K<sup>+</sup>-ion resulting in *E2* conformation, when LAB-TEA placed in the cytoplasmic region. Binding energy in kcal/mol is given in parenthesis. The SF, CC, and CG represent selectivity filter, channel cavity, and channel gate residues respectively.

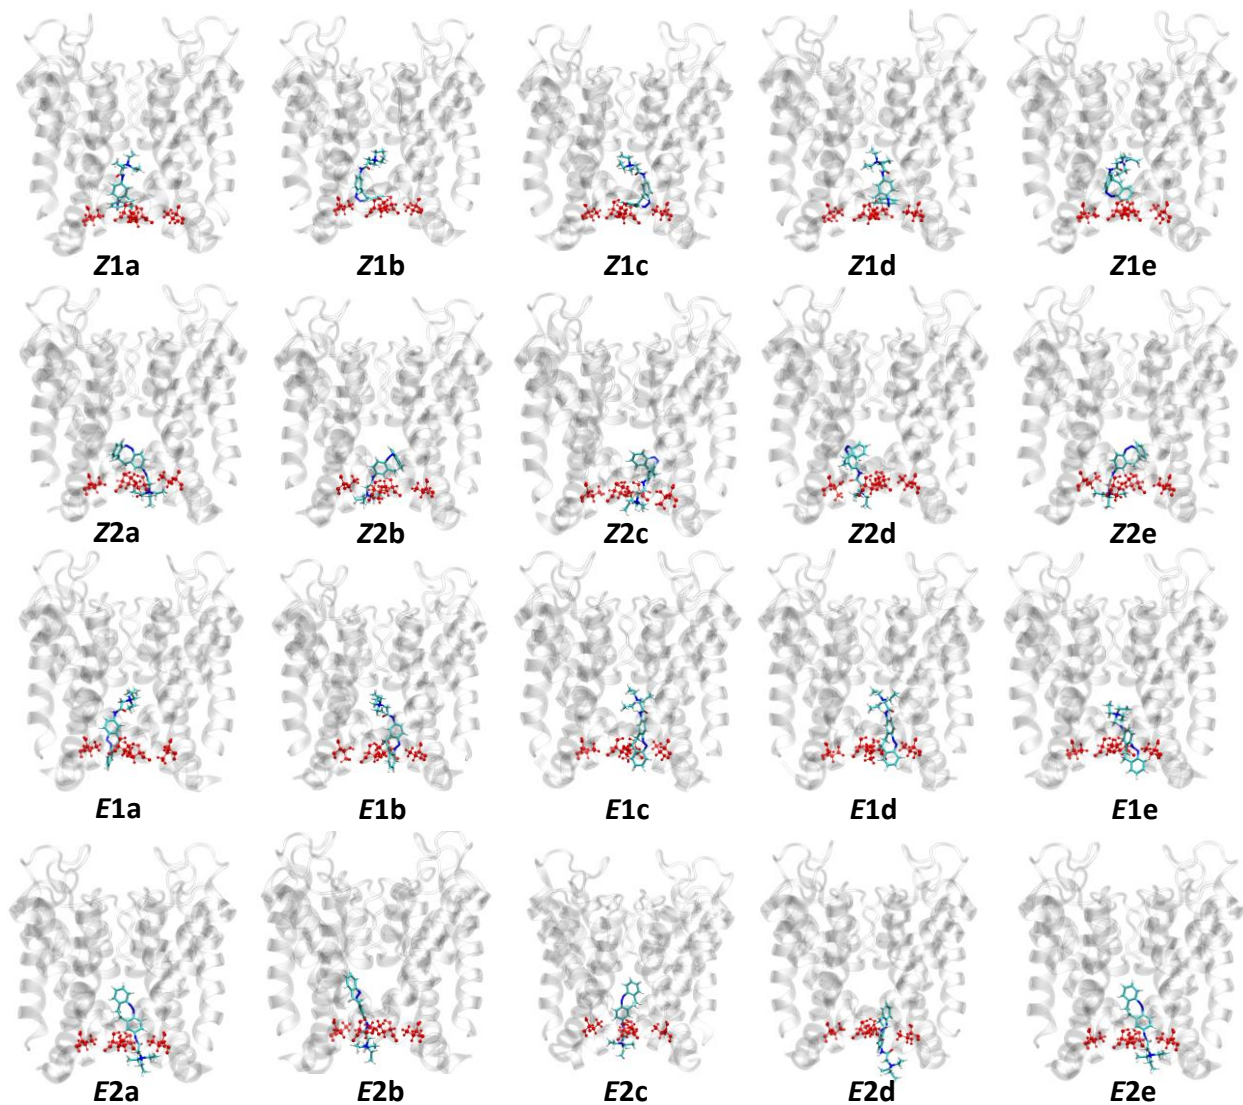

**Figure S21.** Starting structures for the molecular dynamics simulation of *Z*- and *E*-isomers of LAB-TEA (stick model) with KcsA-K<sup>+</sup>-ion channel (new cartoon representation in grey colour) in the absence of K<sup>+</sup>-ion. The LAB-TEA is inside the channel. The amino-acid residue THR-107 (red) shown in ball and stick model.



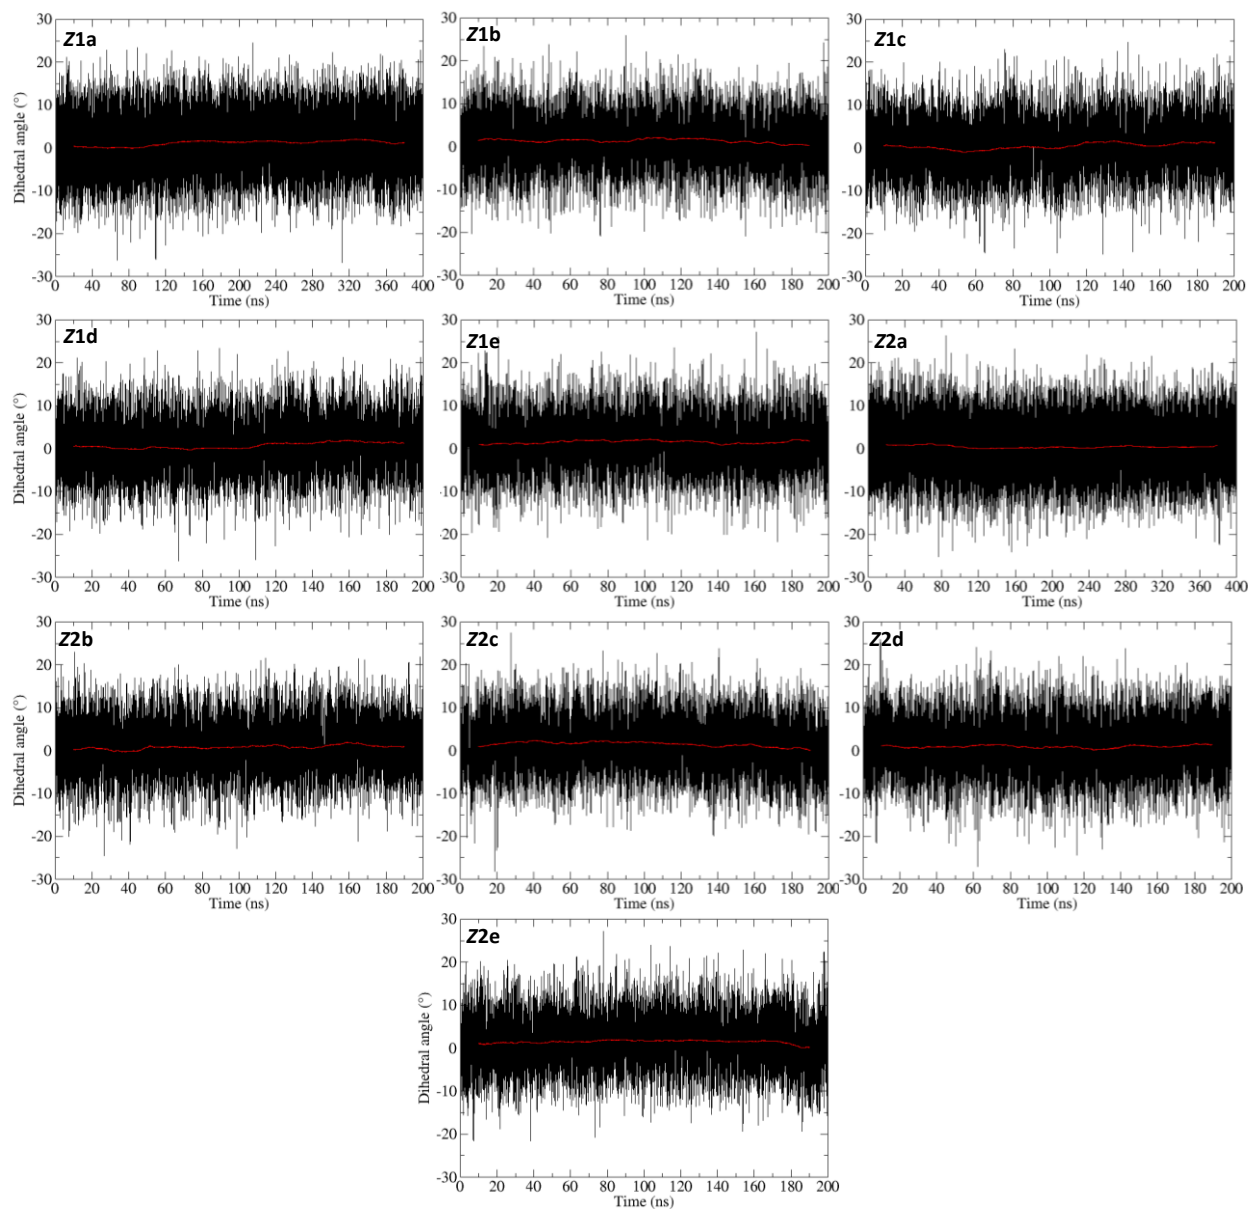

**Figure S22.** Dihedral angle plot (Time (ns) vs. Dihedral angle (degree)) for Z-LAB-TEA when placed inside the channel during simulation without  $K^+$ -ion. Z1a to Z2e represent the starting structure for that particular trajectory. The red line represents the average dihedral angle in degrees.

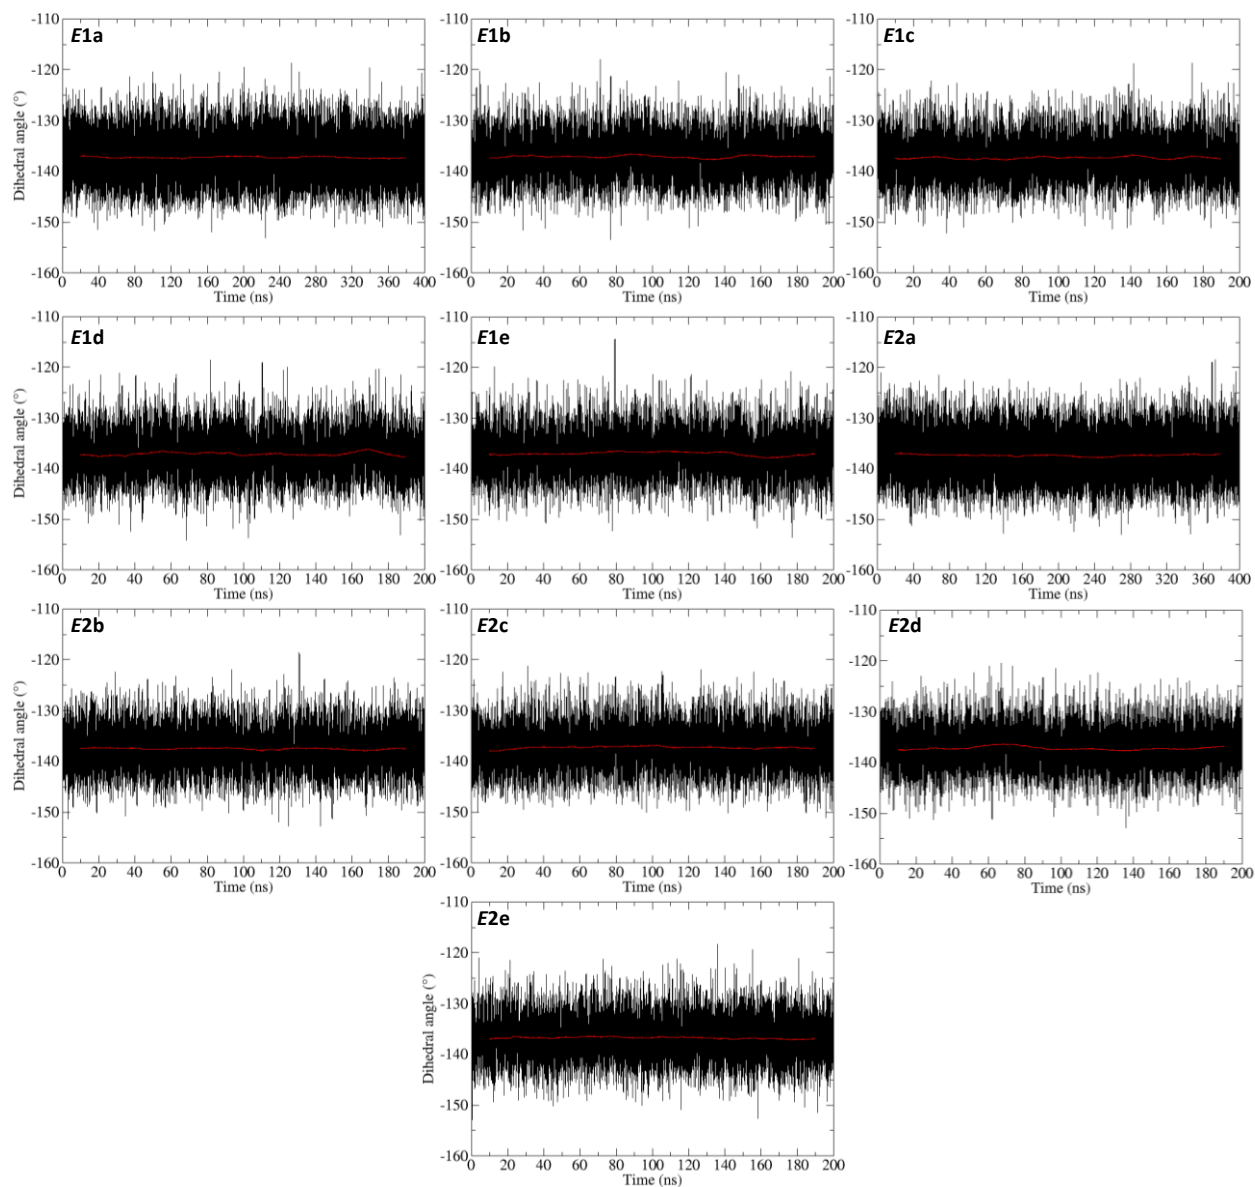

**Figure S23.** Dihedral angle plot (Time (ns) vs. Dihedral angle (degree)) for *E*-LAB-TEA when placed inside the channel during simulation without  $K^+$ -ion. *E*1a to *E*2e represent the starting structure for that particular trajectory. The red line represents the average dihedral angle in degrees.

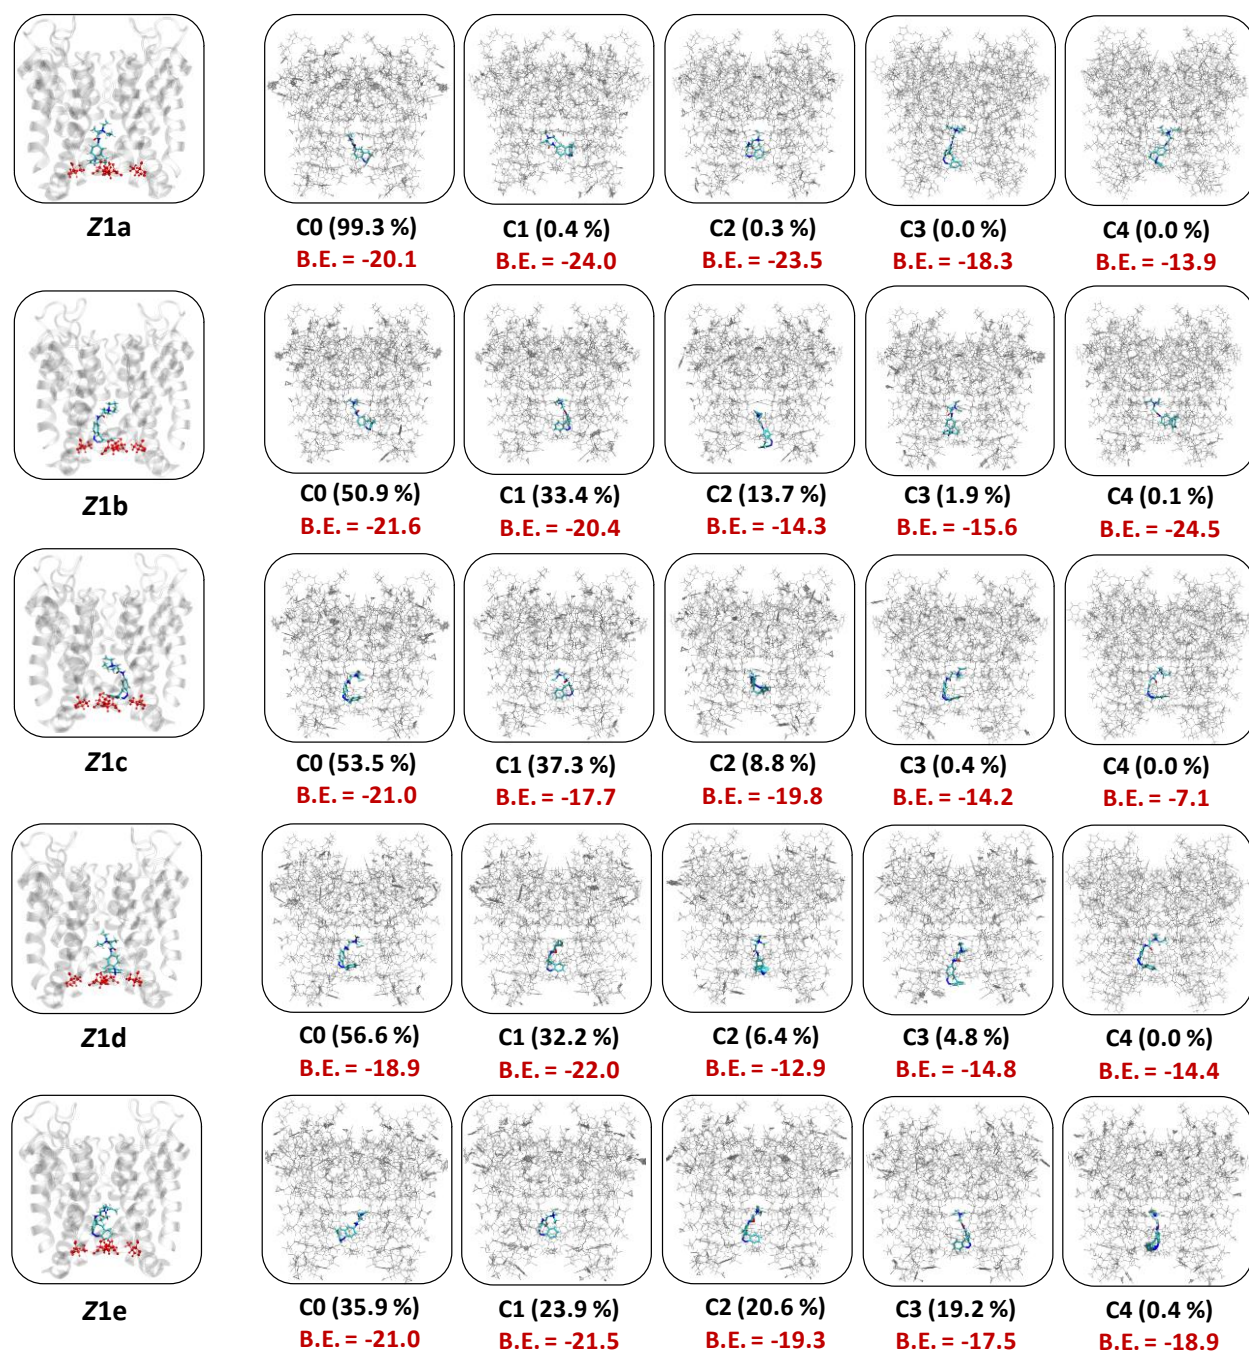

**Figure S24.** Summary of hierarchical average-linkage clustering performed on trajectories of Z-LAB-TEA without  $K^+$ -ion, when LAB-TEA placed inside the channel cavity. Z1a to Z1e are the starting structure for that particular trajectory. The average structure of each cluster is shown, indicating location of LAB-TEA relative to the ion channel. C<sub>n</sub> (n = 0 – 4) indicates different clusters. Percentage occurrence of each cluster is given in parenthesis. Corresponding binding energy (B.E.) is given in kcal/mol. Protein is represented as new cartoon in the starting structure and as lines in the average structures. LAB-TEA is shown as a stick model. All the simulations retained the Z1 binding poses as that in the starting structure.

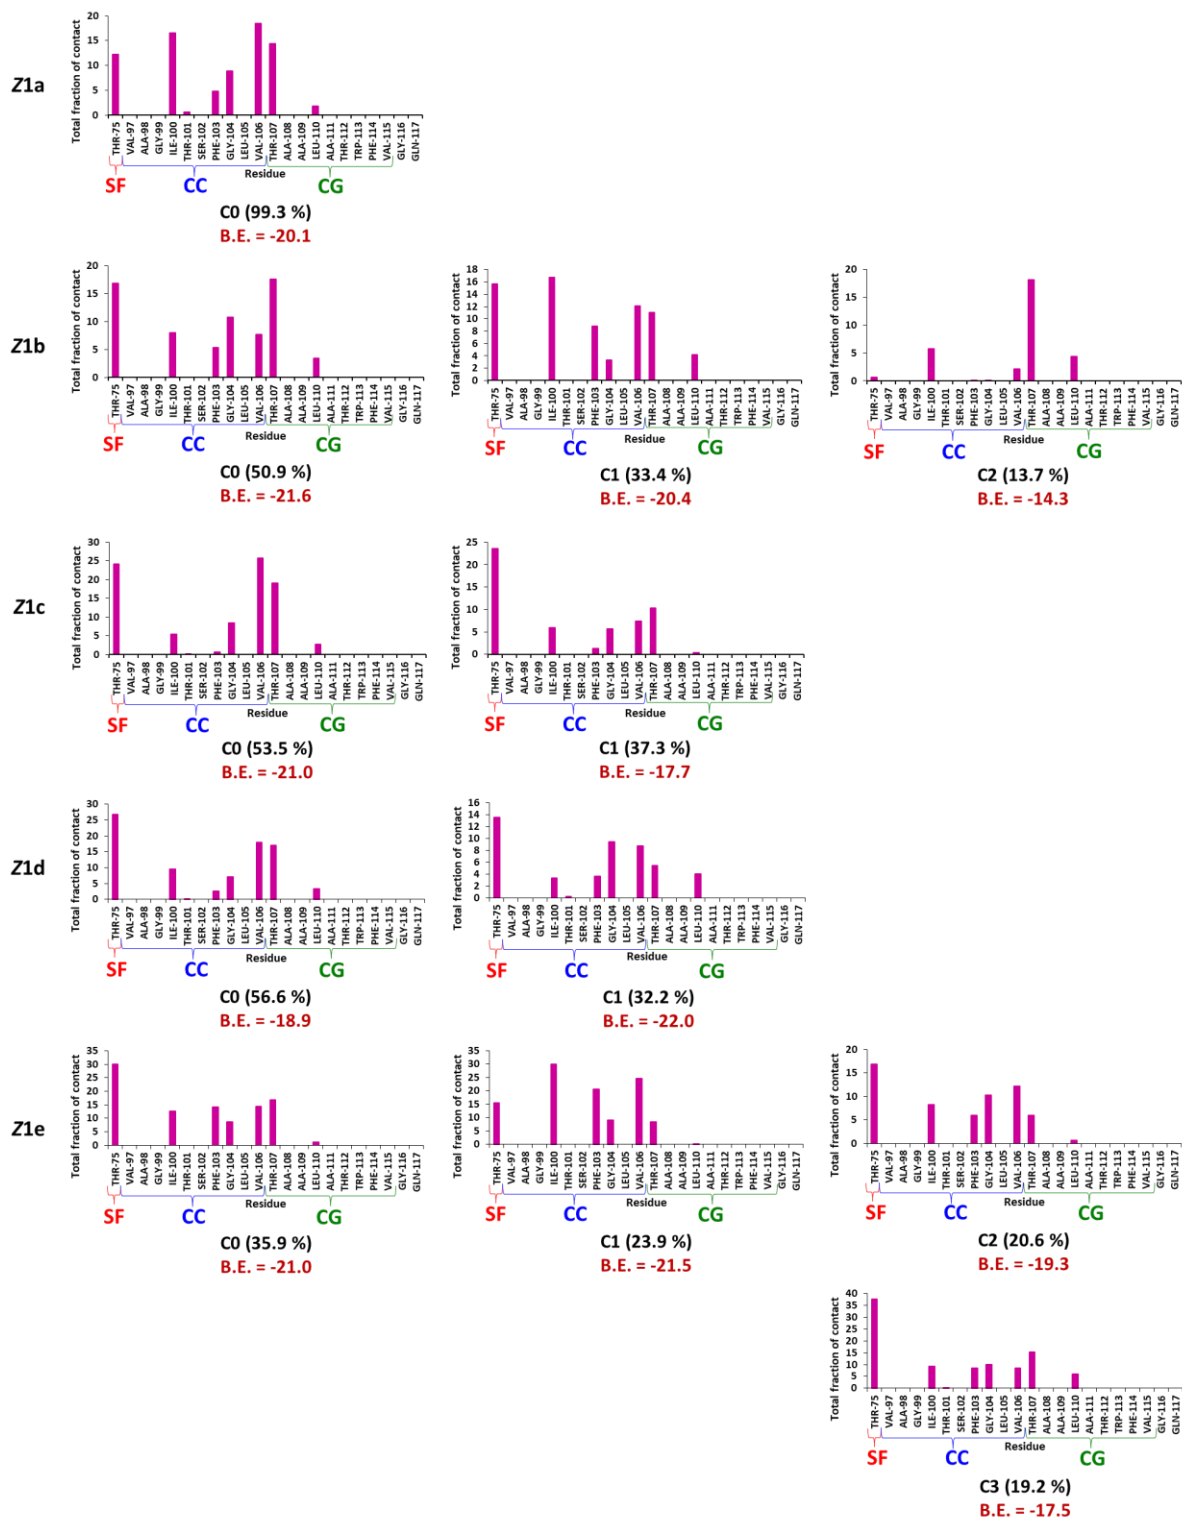

**Figure S25.** Contact plot per residue for the most probable cluster trajectories (Cn with percentage > 10) of KcsA-Z-LAB-QA without K<sup>+</sup>-ion resulting in Z1 conformation, when LAB-TEA placed inside the channel cavity. Binding energy in kcal/mol is given in parenthesis. The SF, CC, and CG represent selectivity filter, channel cavity, and channel gate residues respectively.

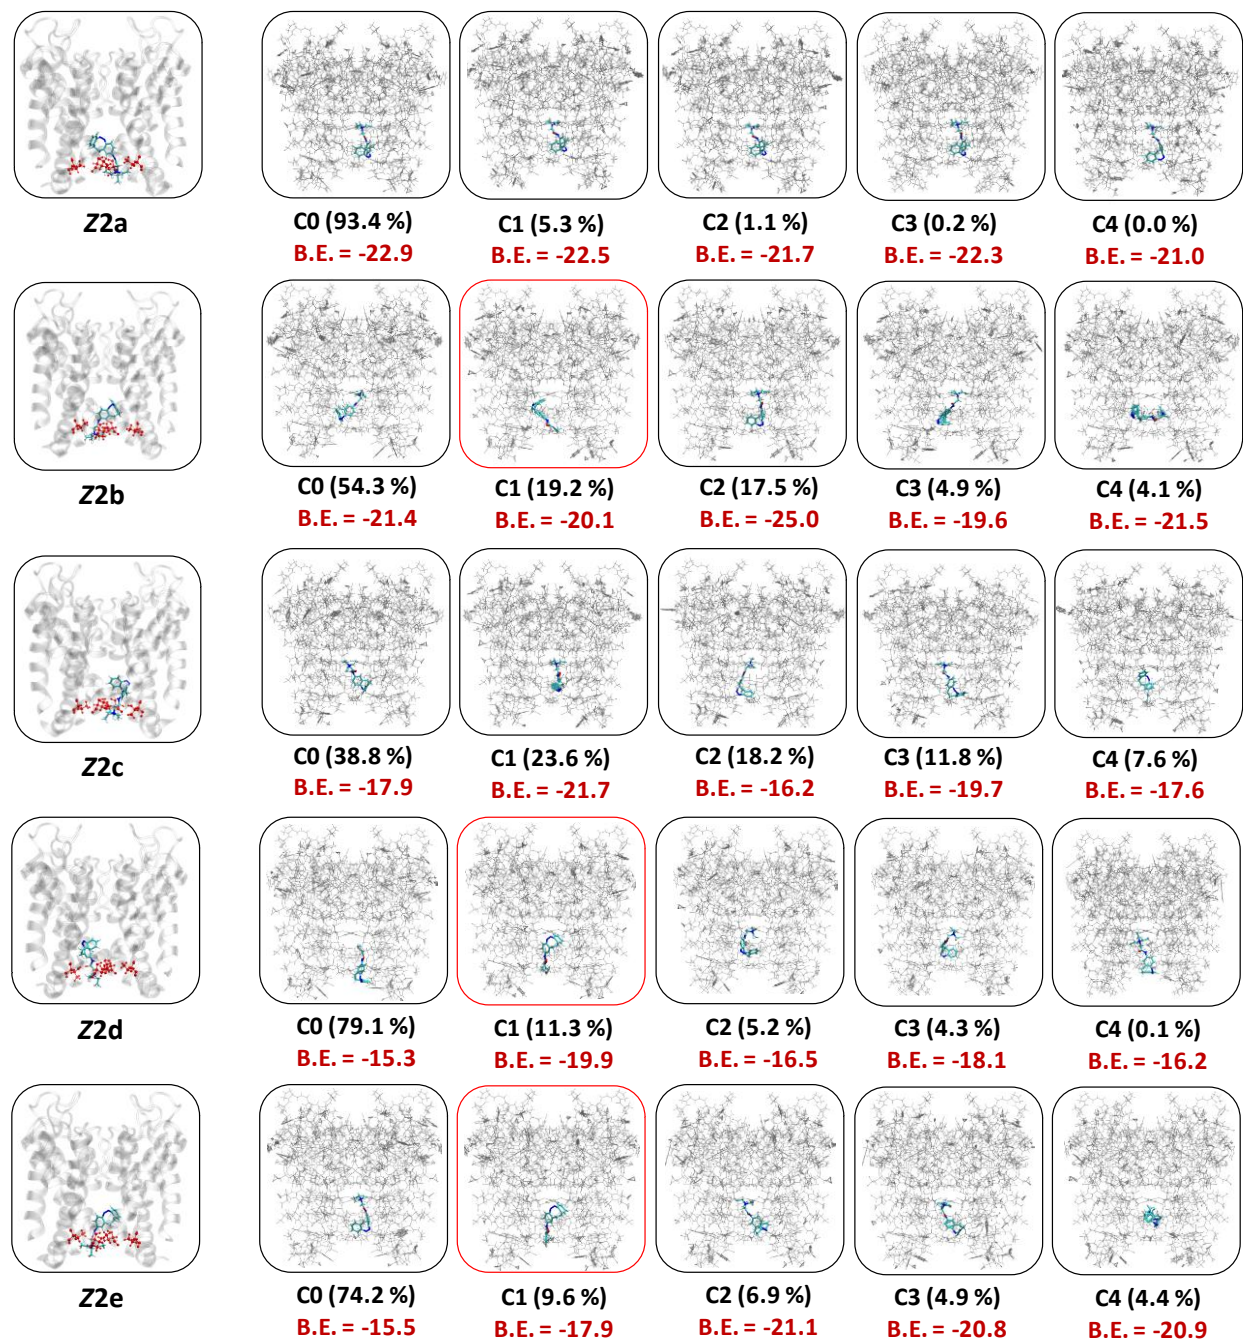

**Figure S26.** Summary of hierarchical average-linkage clustering performed on trajectories of Z-LAB-TEA without  $K^+$ -ion, when LAB-TEA placed inside the channel cavity in Z2 conformation. Z2a to Z2e are the starting structure for that particular trajectory. The average structure of each cluster is shown, indicating location of LAB-TEA relative to the ion channel. Cn ( $n = 0 - 4$ ) indicates different clusters. Percentage occurrence of each cluster is given in parenthesis. Corresponding binding energy (B.E.) is given in kcal/mol. Protein is represented as new cartoon in the starting structure and as lines in the average structures. LAB-TEA is shown as a stick model. All the simulations result in Z2 to Z1 conversion. The clusters showing Z2 conformation is highlighted in red (9.6 - 11.3%).

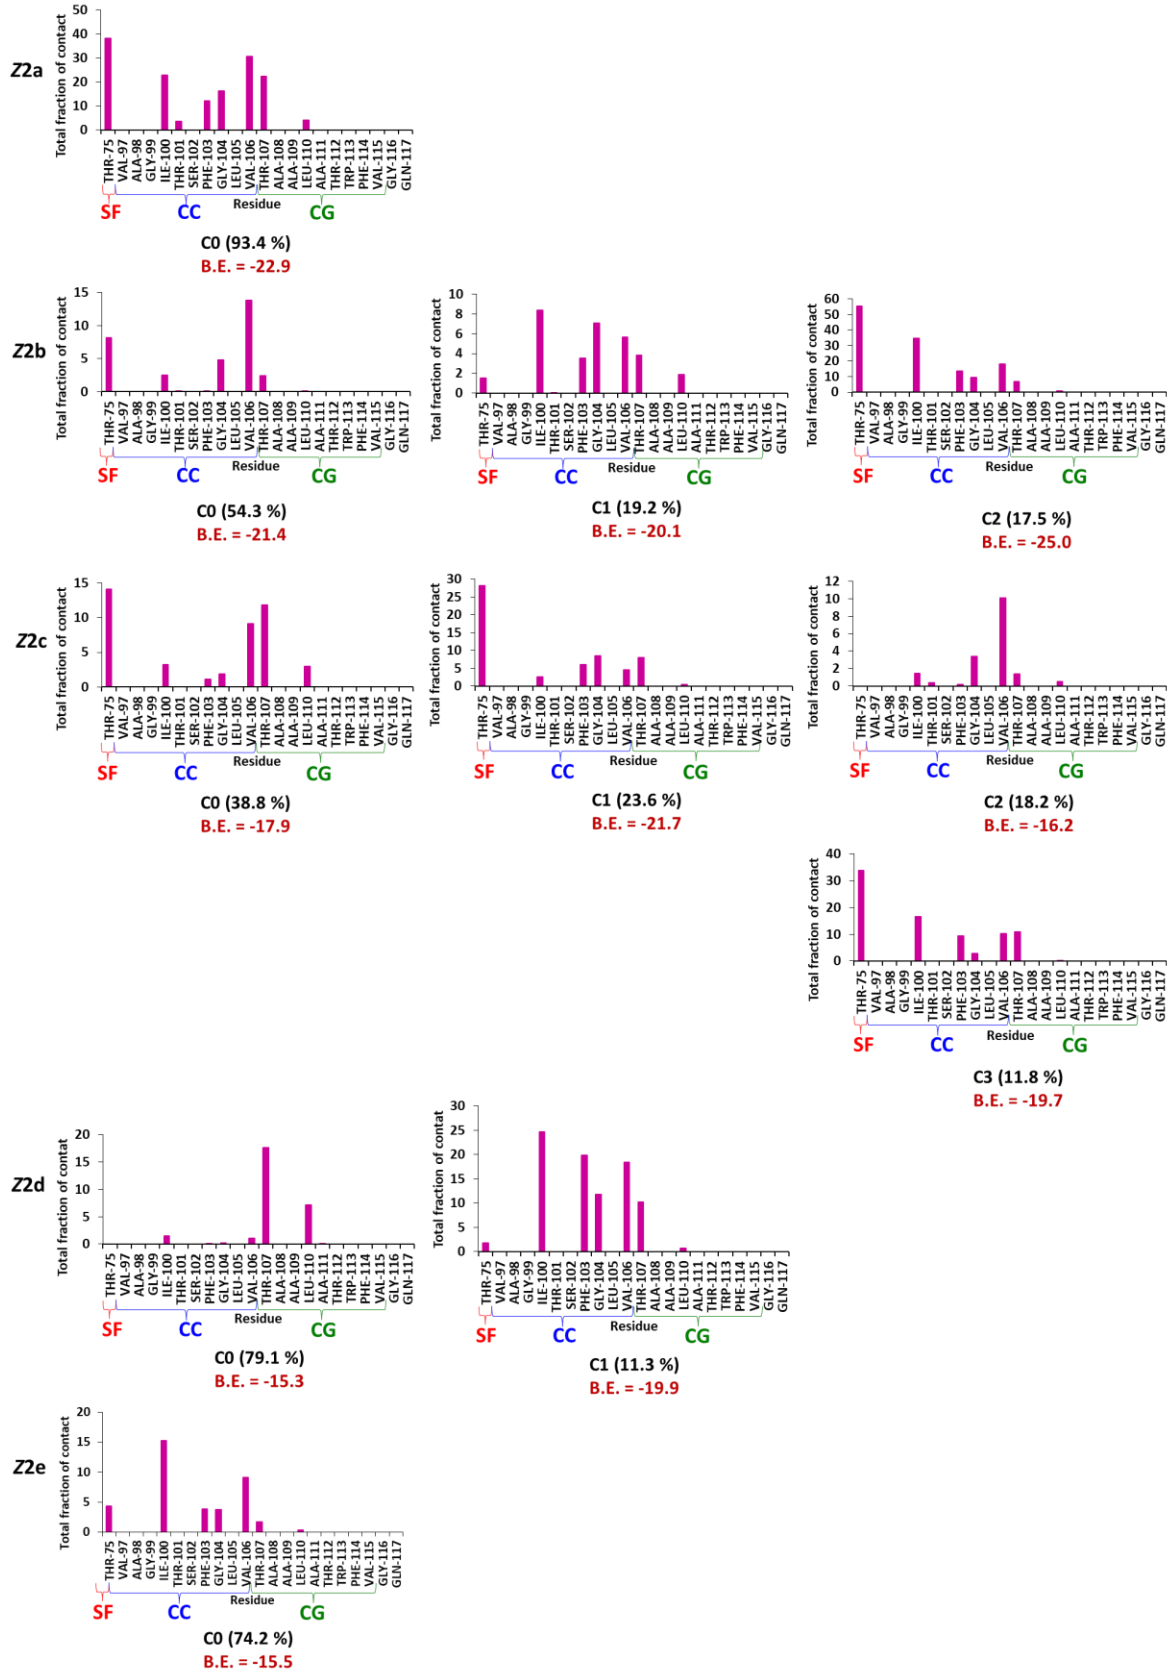

**Figure S27.** Contact plot per residue for the most probable cluster trajectories (Cn with percentage

> 10) of KcsA-Z-LAB-TEA without K<sup>+</sup>-ion resulting in Z1 and Z2 conformations, when LAB-TEA placed inside the channel cavity in Z2 conformation. Binding energy in kcal/mol is given in parenthesis. The SF, CC, and CG represent selectivity filter, channel cavity, and channel gate residues respectively.

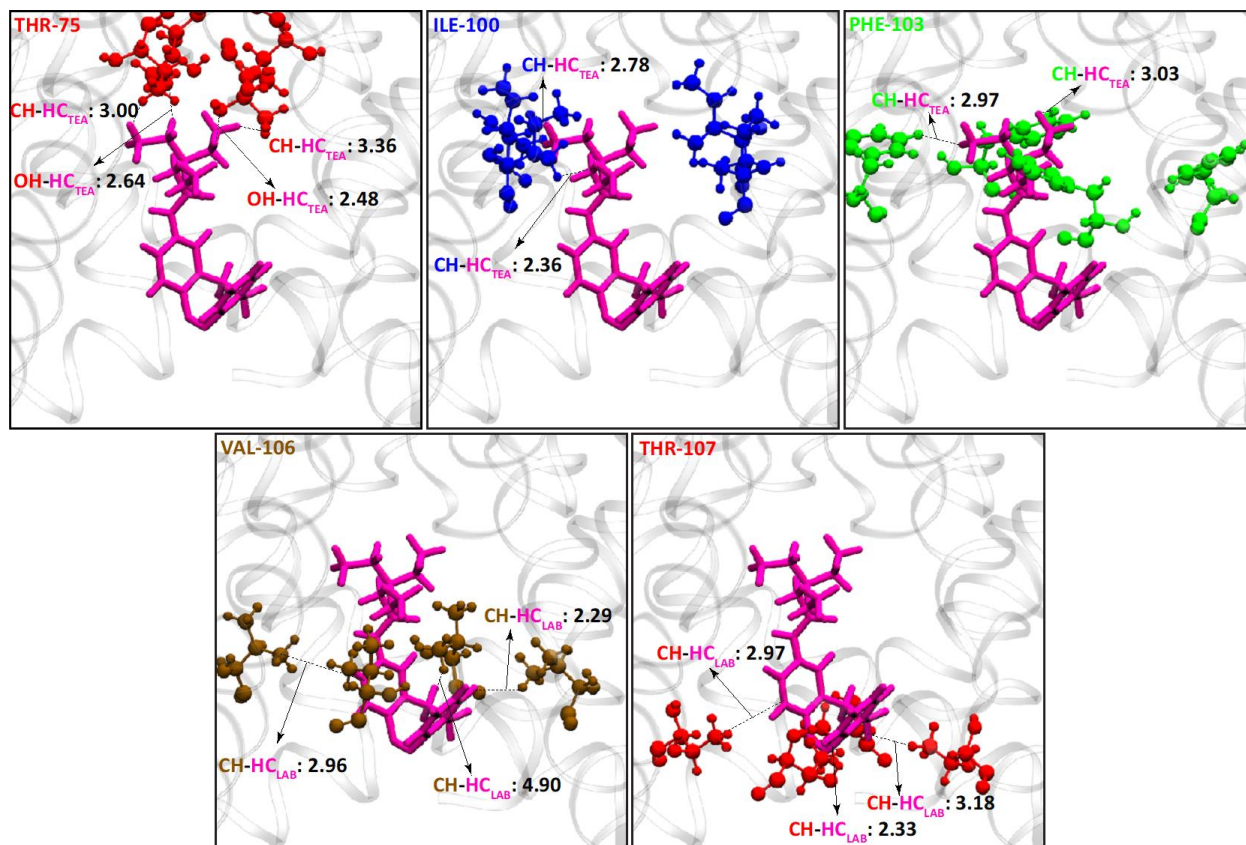

**Figure S28.** Interaction of Z1 conformation with individual channel residues in the most probable conformation (C0), of the trajectory resulting in Z1, when simulation performed with Z-LAB-QA inside the channel cavity, without K<sup>+</sup>-ion. The protein and Z1 represented as ribbon and stick (magenta) respectively, and the interacting residues THR-75 (red), ILE-100 (blue), PHE-103 (green), VAL-106 (ochre), and THR-107 (red) from extracellular to intracellular region in ball and stick model. The distances are given in Angstrom. Residue numbers are given in the upper left corner of each box.

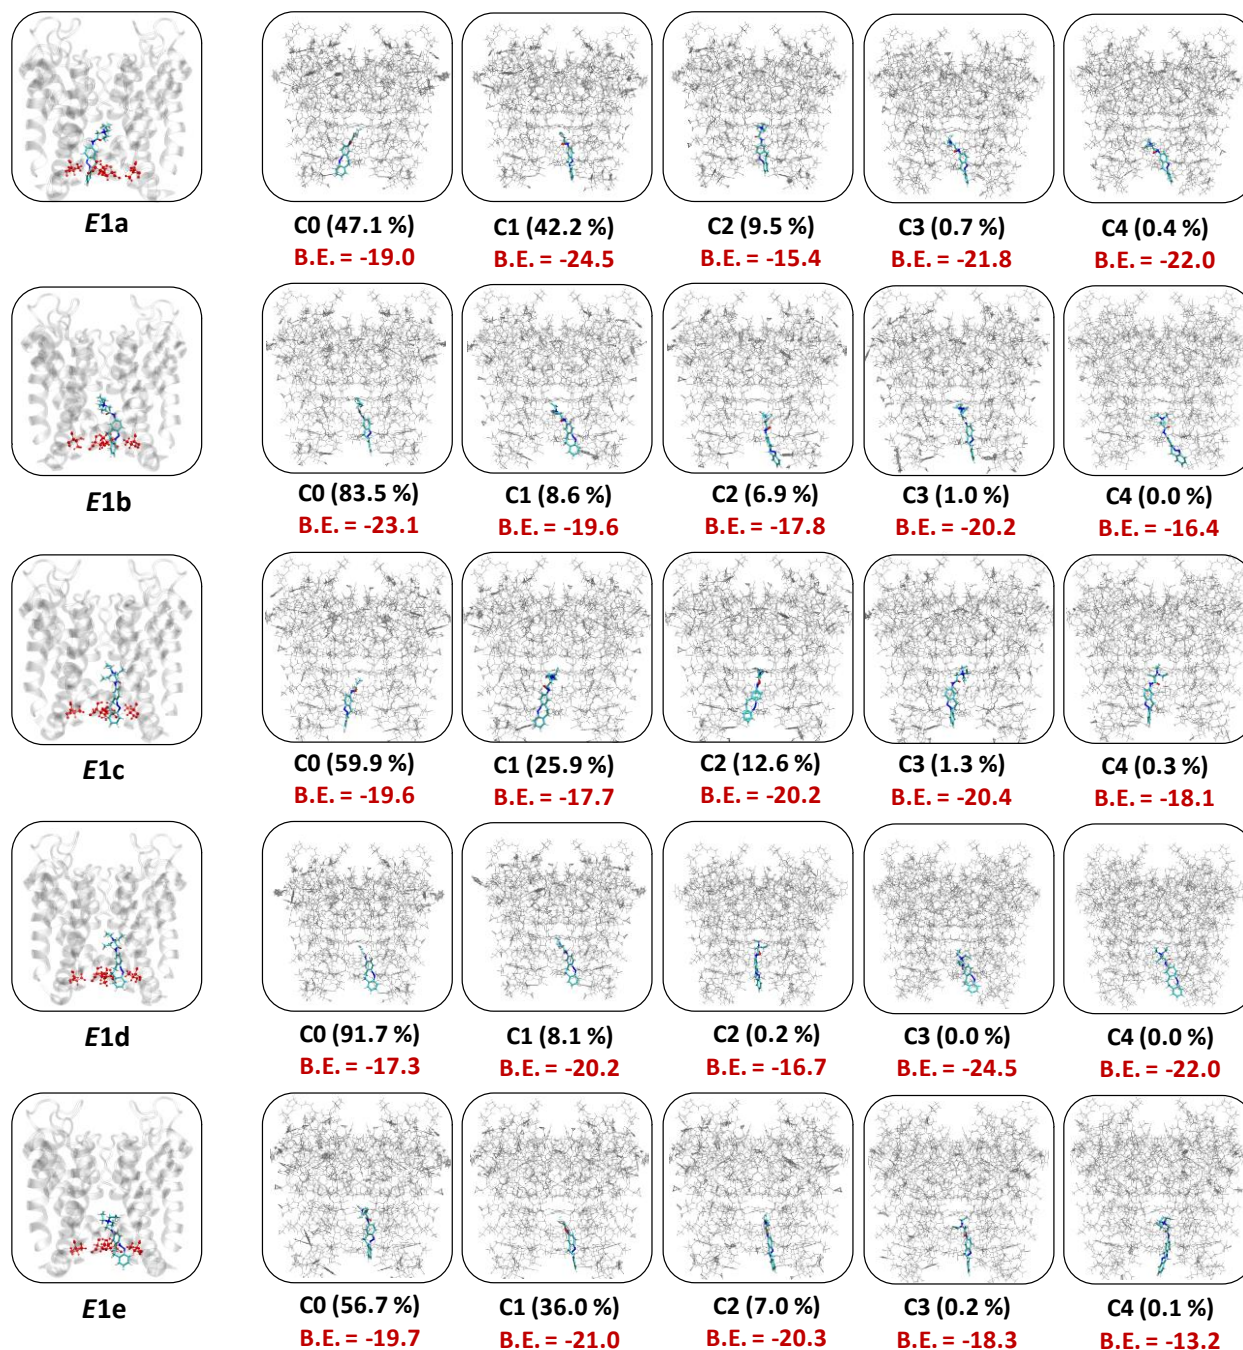

**Figure S29.** Summary of hierarchical average-linkage clustering performed on trajectories of *E*-LAB-TEA without  $K^+$ -ion, when LAB-TEA placed inside the channel cavity. *Ea* to *Ec* are the starting structure for that particular trajectory. The average structure of each cluster is shown, indicating location of LAB-TEA relative to the ion channel.  $C_n$  ( $n = 0 - 4$ ) indicates different clusters. Percentage occurrence of each cluster is given in parenthesis. Corresponding binding energy (B.E.) is given in kcal/mol. Protein is represented as new cartoon in the starting structure and as lines in the average structures. LAB-TEA is shown as a stick model. All the simulations retained the *E1* binding poses as that in the starting structure.



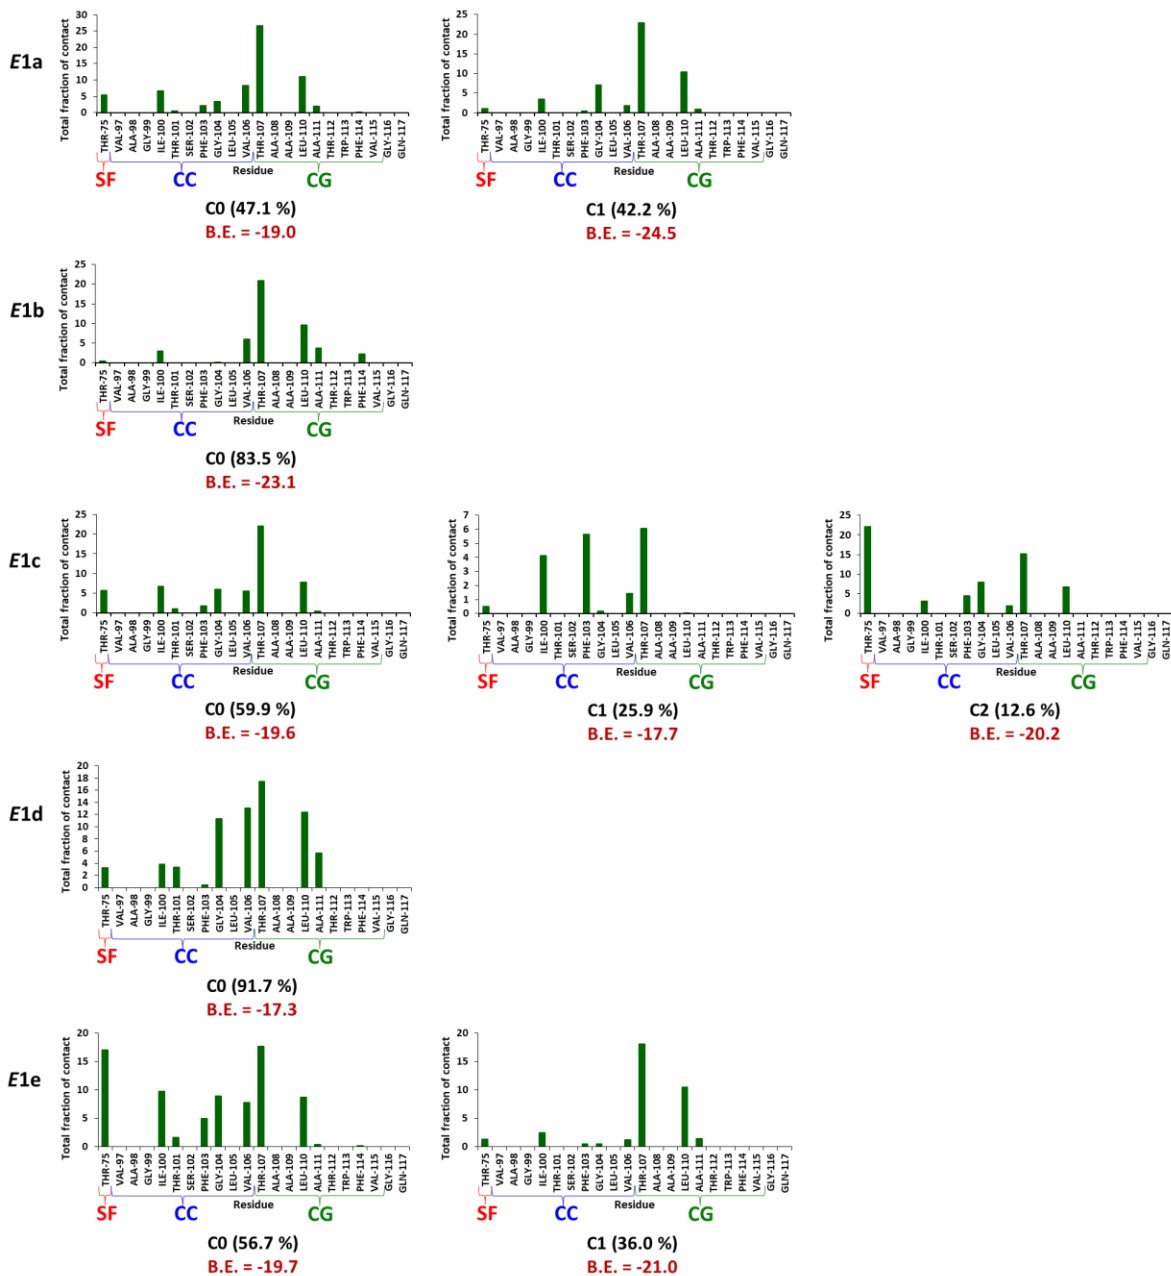

**Figure S30.** Contact plot per residue for the most probable cluster trajectories (Cn with percentage > 10) of KcsA-E-LAB-TEA without K<sup>+</sup>-ion resulting in E1 conformation, when LAB-TEA placed inside the channel cavity in E1 conformation. Binding energy in kcal/mol is given in parenthesis. The SF, CC, and CG represent selectivity filter, channel cavity, and channel gate residues respectively.

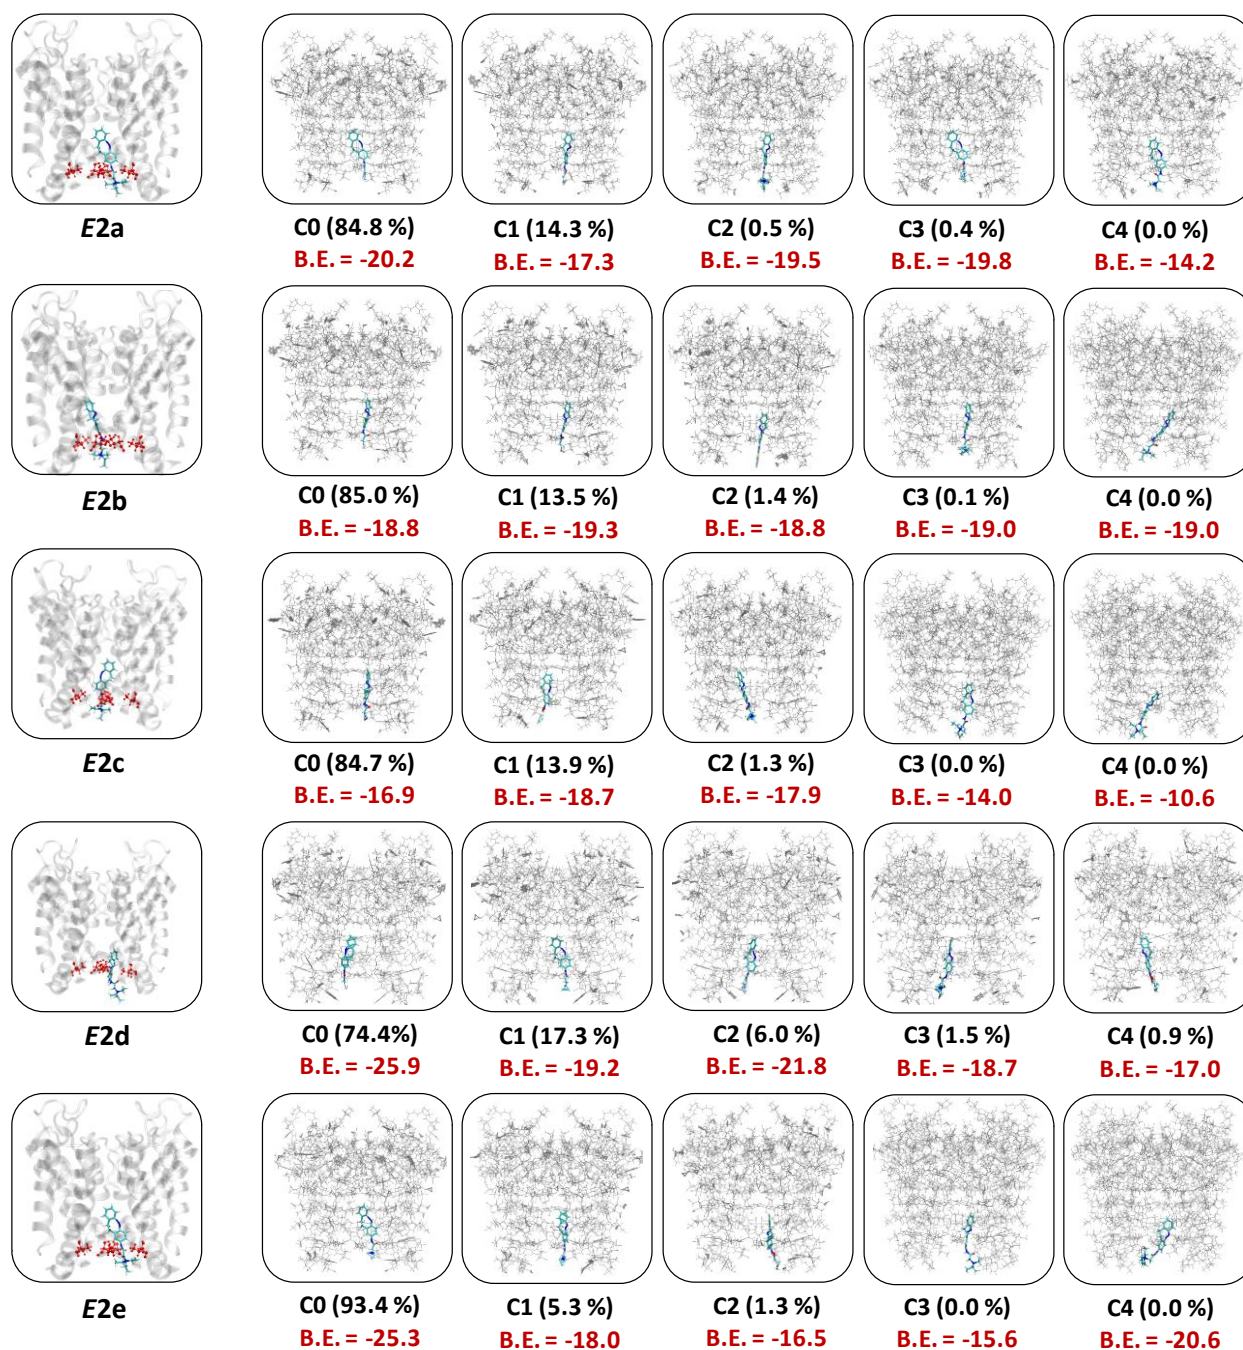

**Figure S31.** Summary of hierarchical average-linkage clustering performed on trajectories of *E*-LAB-TEA without  $K^+$ -ion, when LAB-TEA placed inside the channel cavity. *E2a* to *E2e* are the starting structure for that particular trajectory. The average structure of each cluster is shown, indicating location of LAB-TEA relative to the ion channel.  $C_n$  ( $n = 0-4$ ) indicates different clusters. Percentage occurrence of each cluster is given in parenthesis. Corresponding binding energy (B.E.) is given in kcal/mol. Protein is represented as new cartoon in the starting structure and as lines in the average structures. LAB-TEA is shown as a stick model. All the simulations retained the *E2* binding poses as that in the starting structure.

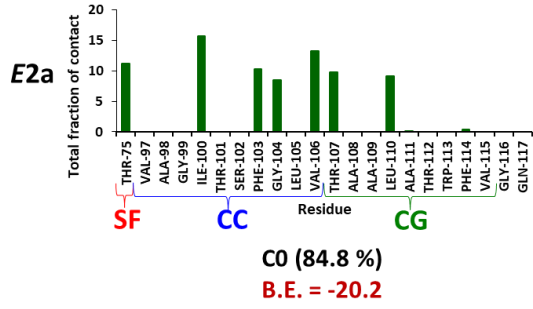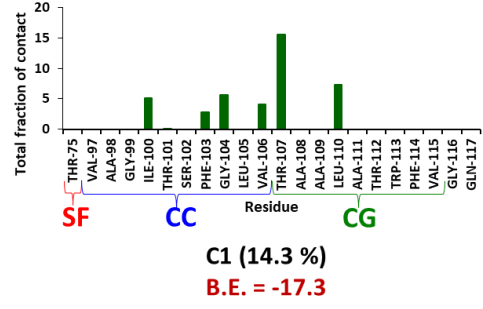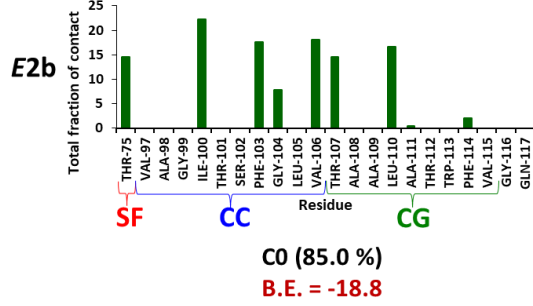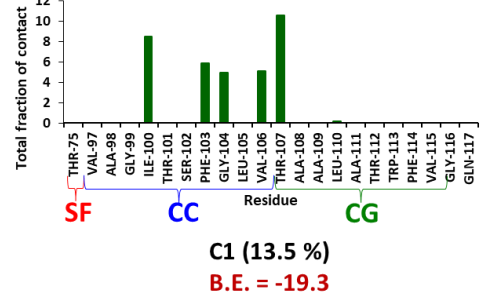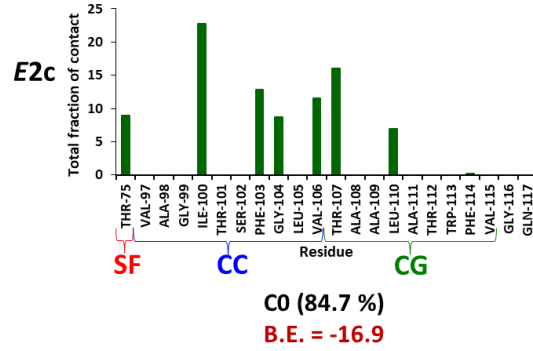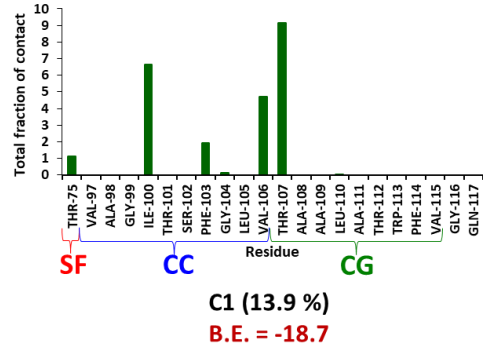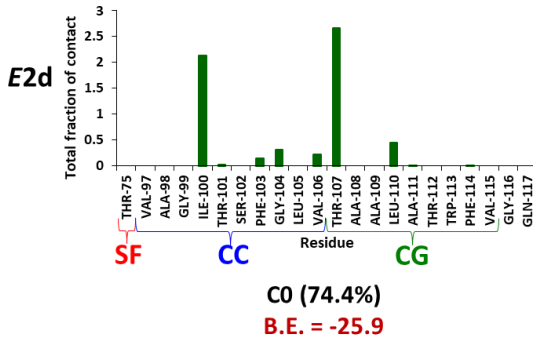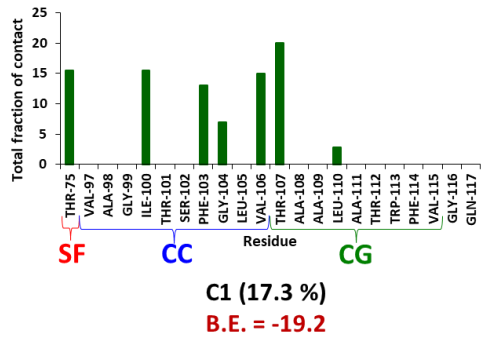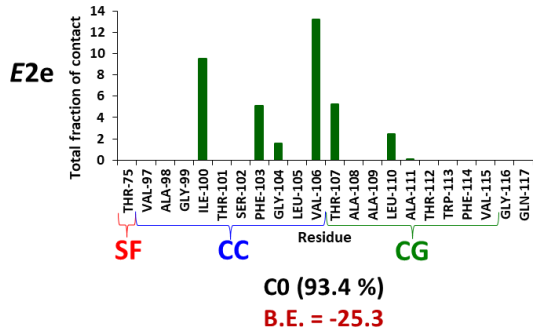

**Figure S32.** Contact plot per residue for the most probable cluster trajectories (Cn with percentage > 10) of KcsA–E-LAB-TEA without K<sup>+</sup>-ion resulting in E2 conformation, when LAB-TEA placed inside the channel cavity in E2 conformation. Binding energy in kcal/mol is given in parenthesis. The SF, CC, and CG represent selectivity filter, channel cavity, and channel gate residues respectively.

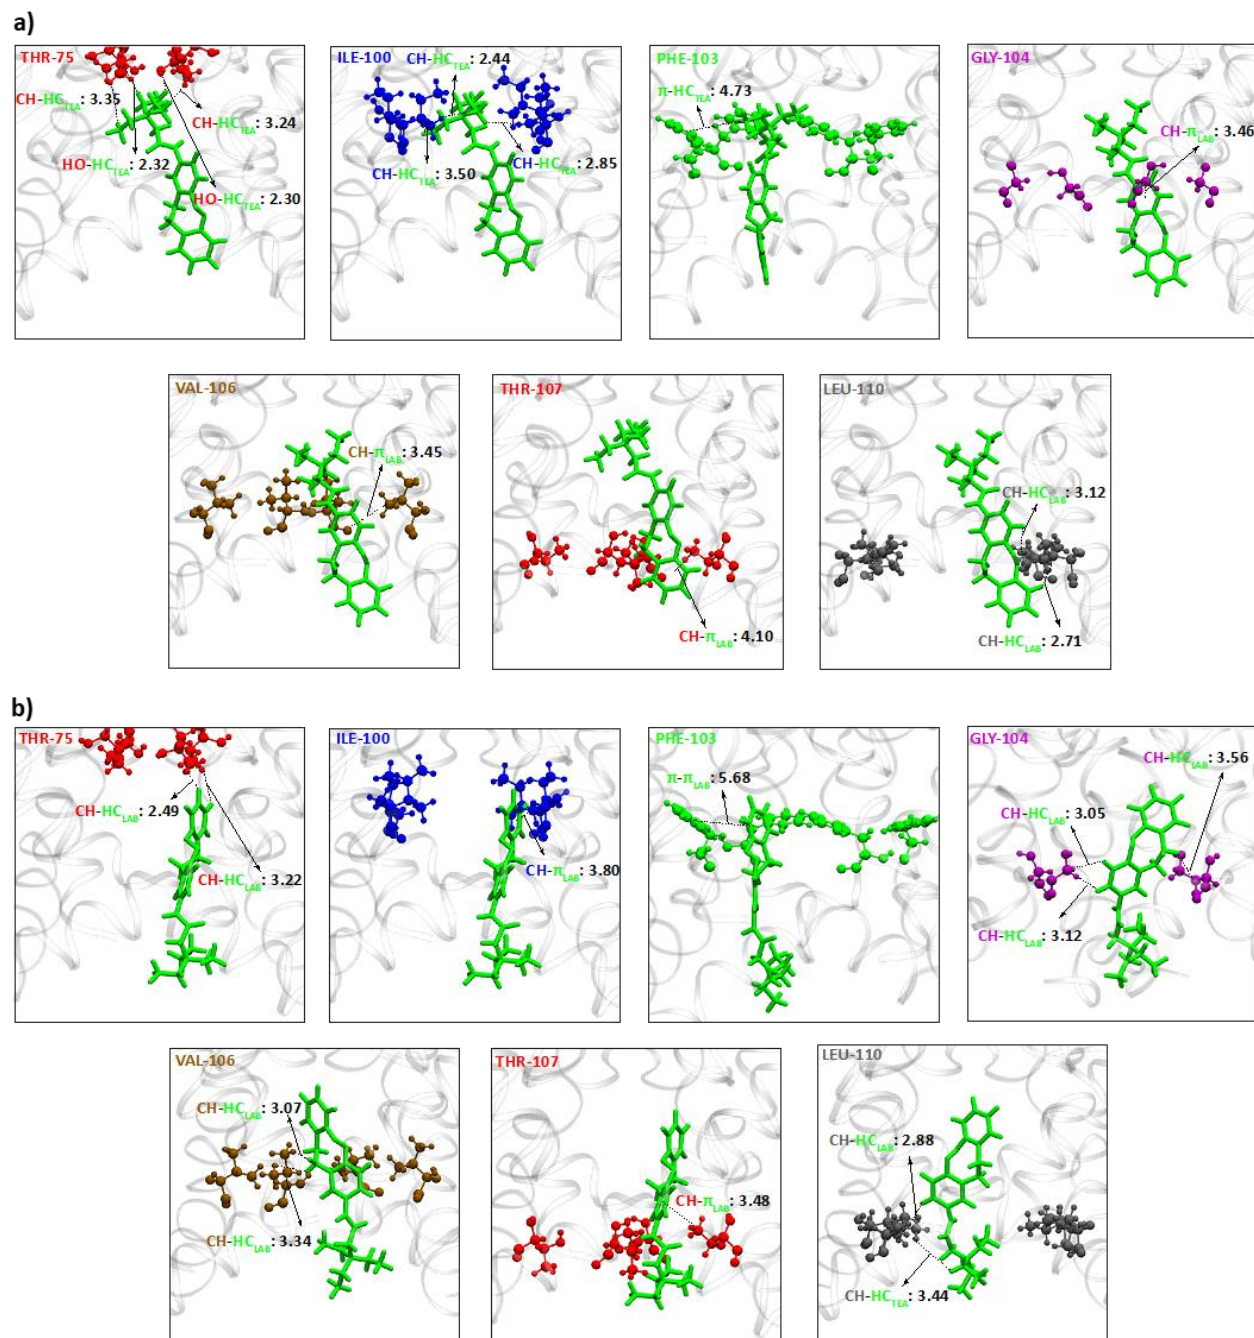

**Figure S33.** Interaction of (a) E1 and (b) E2 conformation with individual channel residues in the most probable conformation (C0), when simulation performed with E-LAB-TEA inside the channel cavity, without K<sup>+</sup>-ion. The protein and E-LAB-TEA are represented as ribbon and stick (green) respectively, and the interacting residues THR-75 (red), ILE-100 (blue), PHE-103 (green),

GLY-104 (purple), VAL-106 (ochre), THR-107 (red), and LEU-110 (grey) from extracellular to the intracellular region in the ball and stick model. The distances are given in Angstrom. Residue numbers are given in the upper left corner of each box.

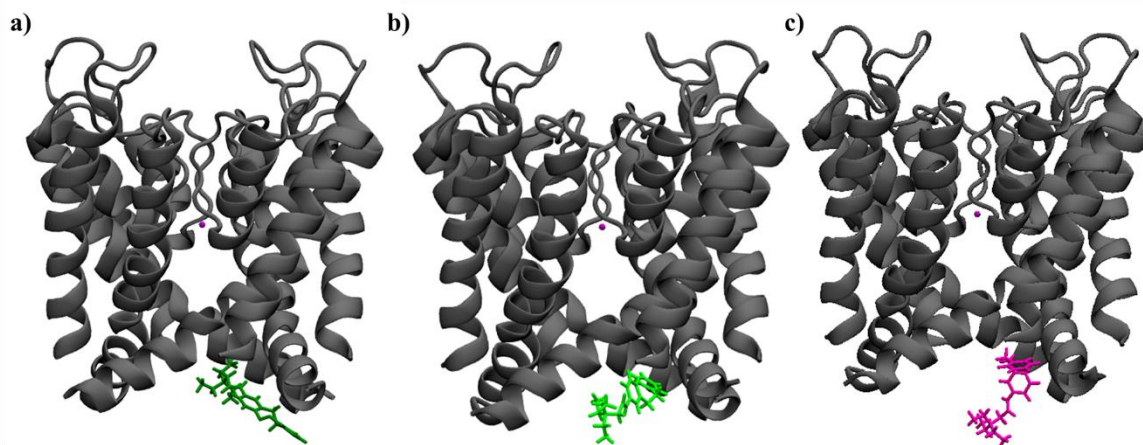

**Figure S34.** The structure of a) *E1*, b) *E2*, and c) *Z1* corresponds to the first energy barrier in Figure 10, where *E1* (dark green), *E2* (green), and *Z1* (magenta) encounter the channel gate residues for the first time during their transition from the intracellular region. The KcsA channel is shown in ribbon and  $K^+$ -ion is shown as the purple ball.

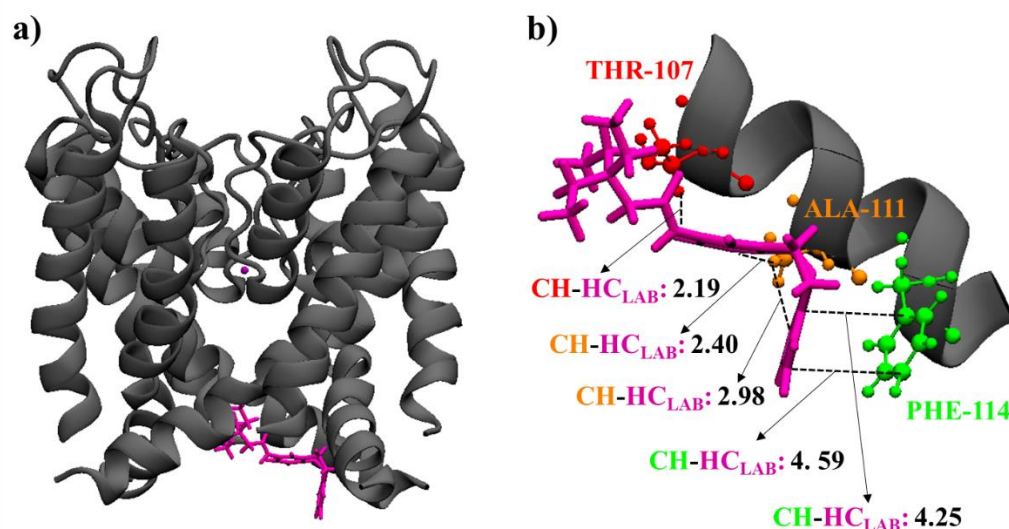

**Figure S35.** The structure of a) *Z1* corresponds to the energy ‘dip’ in the PMF plot, Figure 10. b) Possible interactions of LAB moiety of *Z1* with the channel gate residues. The KcsA channel is shown in ribbon and  $K^+$ -ion is shown as the purple ball.

### Supplementary Table S1

**Table S1.** The calculated binding energy ( $\Delta H$ ) and entropy contribution ( $T\Delta S$ ) using the molecular mechanics Poisson Boltzmann surface area (MMPBSA) and the Kongsted Ryde entropy methods respectively are given.

| Starting structure | Cluster (% Population) | Conformation | $\Delta H$ | $T\Delta S$<br>in kcal/mol | $\Delta H - T\Delta S$ |
|--------------------|------------------------|--------------|------------|----------------------------|------------------------|
| Z1a                | C0 (71.6)              | Z1           | -21.6      | -22.1                      | 0.5                    |
| Z1h                | C0 (32.3)              | Z2           | -17.0      | -20.3                      | 3.3                    |
| E1a                | C0 (81.4)              | E1           | -19.2      | -20.3                      | 1.1                    |
|                    | C1 (10.2)              | E1           | -16.6      | -23.2                      | 6.6                    |
| E1b                | C0 (87.2)              | E1           | -22.3      | -20.9                      | -1.4                   |
| E1d                | C0 (41.7)              | E1           | -20.6      | -21.6                      | 1.0                    |
|                    | C1 (38.1)              | E1           | -20.4      | -19.7                      | -0.7                   |
| E1f                | C0 (95.5)              | E1           | -18.9      | -20.2                      | 1.4                    |
| E1g                | C0 (46.9)              | E1           | -18.9      | -19.9                      | 1.1                    |
|                    | C1 (36.8)              | E1           | -19.7      | -20.8                      | 1.1                    |
| E1h                | C0 (84.3)              | E1           | -21.4      | -20.6                      | -0.8                   |
| E2b                | C1 (23.5)              | E2           | -19.0      | -19.5                      | 0.5                    |
|                    | C2 (22.1)              | E2           | -15.1      | -19.4                      | 4.3                    |
| E2d                | C0 (64.9)              | E2           | -19.0      | -18.3                      | -0.7                   |
| E2e                | C0 (90.9)              | E2           | -18.5      | -19.8                      | 1.4                    |
| E2g                | C0 (67.4)              | E2           | -15.3      | -25.2                      | 10.0                   |
| E2h                | C0 (93.4)              | E2           | -19.8      | -19.2                      | -0.6                   |
| E1c                | C1 (39.8)              | E2           | -18.6      | -20.0                      | 1.4                    |
| E1e                | C0 (87.6)              | E2           | -18.1      | -17.5                      | -0.6                   |

LAB-TEA binding accompanies high entropy contribution, as a free ligand bind inside the channel cavity.
